# Supplementary material for: A-to-I RNA editing contributes to the persistence of predicted damaging mutations in populations
Source: HighWire-hosted journal article supplement (doi:10.1101/gr.246033.118), 2019-09-12
Supplement: Supplemental_Figures_Tables.docx [file Supplemental_Figures_Tables.docx]

Supplemental Figures and Tables for

**A-to-I RNA editing contributes to the persistence of predicted damaging mutations in populations**

Te-Lun Mai and Trees-Juen Chuang

**The PDF file includes 14 supplemental figures (Supplemental Figures S1-S14) and three supplemental tables (Supplemental Tables S1-S3).**

**Supplemental Figure S1.** Measurements of the specificity of the identified RNA editing sites.

**Supplemental Figure S2.** The host gene expression of the examined nonsynonymous/synonymous editing events at sites with neutral and deleterious A-to-G/G-to-A genomic changes.

**Supplemental Figure S3.** Correlation between proportions of deleterious nonsynonymous genomic changes and minor allele frequency in the LCL population.

**Supplemental Figure S4.** Correlation between editing activities and allele frequency of A before and after controlling for GC content and the host gene expression of the examined nonsynonymous sites.

**Supplemental Figure S5.** Scatter plots representing the RNA editing-allele frequency correlations in different categories of evolutionary rates or functional importance of the target genes/loci.

**Supplemental Figure S6.** Functional and evolutionary analysis of the RNA editing-allele frequency correlations for synonymous editing sites.

**Supplemental Figure S7.** Scatter plots representing the RNA editing-allele frequency correlations for five Phylogenetic types of nonsynonymous editing sites.

**Supplemental Figure S8.** Relationship between the distributions of different types of rare missense variants and A-to-G RNA editing using another tool to assess the deleteriousness of the rare missense mutations.

**Supplemental Figure S9.** Relationship between the distributions of different types of rare missense variants and A-to-G RNA editing in different human subpopulations.

**Supplemental Figure S10.** Ratios of the number of RNA-DNA variant events at SNP sites with deleterious genomic changes to those at SNP sites with neutral/harmless ones for G-to-A/C-to-T RNA-DNA variant events at A-to-G/T-to-C SNP sites and A-to-G/T-to-C RNA-DNA variant events at G-to-A/C-to-T SNP sites.

**Supplemental Figure S11.** Effect of mutation rates on the relationship between the distribution of six SNP types and the corresponding CADD scores.

**Supplemental Figure S12.** Relationship between the distributions of different types of rare missense variants and A-to-G RNA editing in first and non-first coding exons.

**Supplemental Figure S13.** Median editing levels of different phylogenetic types of nonsynonymous A-to-G editing sites.

**Supplemental Figure S14.** Comparisons of synonymous editing level (median level) at A/G genomic variant sites with harmless and deleterious A-to-G/G-to-A reference-to-alternative allele changes in the LCL population.

**Supplemental Table S1.** Comparisons of median RNA editing levels for the A/G SNP sites with different allele frequency of A for each group of genes with stronger or weaker strength of selective constraints/functional importance.

**Supplemental Table S2.** Numbers of six types of rare missense mutations with different deleterious effects in the 1000 Genome project.

**Supplemental Table S3.** Individual mutational burden analysis of the two types of rare transition missense variants in the 1000 genome project.

**Other Supplementary Material in this manuscript:**

**Supplemental File S1** (Microsoft Excel format). Human A-to-G RNA editing sites and the related information analyzed in this study.

**Supplementary Figures**

**A B C**

**Supplemental Figure S1.** Measurements of the specificity of the identified RNA editing sites. (A) Distribution of different types of all the detected RNA-DNA variants for the LCL samples of 447 individuals. The RNA-DNA variants were classified into six groups rather than twelve because the variants could occur in both the sense and antisense transcripts. (B) and (C) Comparisons of (B) the median allelic ratio (the ratio of number of G reads to the sum of numbers of A and G reads) and (C) the *cis*-preference of the ADAR motif (measured by the observed-to-expected (*O/E*) ratio of the presence of “non-G” immediately upstream and “G” immediately downstream to the editing sites) for SNP and non-SNP editing sites. For known SNPs, to minimize the possibility that a known SNP was also an editing site, the known SNP sites located within a cluster of editing were excluded. The number of sites examined in each group was provided in parentheses. *P* values were determined using two-tailed Wilcoxon rank-sum test (B) and *Chi*-square test (C).

**A B**

**Supplemental Figure S2.** The host gene expression of the examined (A) nonsynonymous and (B) synonymous editing events at sites with neutral (CADD≤10) and deleterious (CADD>10) A-to-G/G-to-A genomic changes. *P* values were determined using two-tailed Wilcoxon rank-sum test. NS, not significant.

**Supplemental Figure S3.** Correlation between proportions of deleterious nonsynonymous genomic changes and minor allele frequency in the LCL population.

**A B**

**Supplemental Figure S4.** Spearman’s ρ between editing activities ((A) prevalence and (B) median editing level) and allele frequency of A before (white) and after (gray) controlling for GC content and the host gene expression of the examined nonsynonymous sites. Significance: ****P* value < 0.001.**A**

**B**

**Supplemental Figure S5.** Scatter plots representing the RNA editing-allele frequency correlations in different categories of evolutionary rates or functional importance of the target genes/loci. The scatter plots represented the correlations between nonsynonymous editing activities ((A) prevalence and (B) median editing level) and allele A frequency within the LCL population in four categories of evolutionary rates and four categories of functional importance (see the text) of the target genes/loci where the editing sites were located. For the four categories of evolutionary rates, nonsynonymous editing sites were divided into two equal groups based on the high and low scores of the target genes/loci. Significant differences between two independent correlations were estimated using two-tailed Z score test with the paired.r function within the *psych* R library. NS, not significant.

**A**

**B**

**Supplemental Figure S6.** Functional and evolutionary analysis of the RNA editing-allele frequency correlations for synonymous editing sites. Correlations between synonymous editing activities ((A) prevalence and (B) level) and allele A frequency within the LCL population in distinct categories of evolutionary rates and functional importance of the target genes/loci. For four categories of evolutionary rates, editing sites were divided into two equal groups according to the high and low scores of the target genes/loci where the editing sites were located. The statistical significances of Spearman’s rank correlation coefficients (*ρ*) were represented by black stars. Significant differences between two independent correlations (represented by red words) were estimated using two-tailed Z score test with the paired.r function within the *psych* R library. Significance: **P* value < 0.05, ***P* value < 0.01, and ****P* value < 0.001. NS, not significant.

**Supplemental Figure S7.** Scatter plots representing the RNA editing-allele frequency correlations for five Phylogenetic types of nonsynonymous editing sites. Scatter plots represented the correlations between median level of nonsynonymous editing and allele A frequency within the LCL population for five different phylogenetic types of A-to-G nonsynonymous editing sites: (A) A-conserved, (B) G-unfound, (C) hardwired, (D) G-conserved, and (E) diversified.

**Supplemental Figure S8.** Relationship between the distributions of different types of rare missense variants and A-to-G RNA editing using another tool (SIFT) to assess the deleteriousness of the rare missense mutations. For each panel, from left to right, the columns represented correlation between the distributions of different types of rare missense variants and deleteriousness of the corresponding genomic changes, the ƒ(G-to-A/C-to-T)/ƒ(A-to-G/T-to-C) ratios for different deleterious effects of the genomic changes, comparisons of the individual mutational burden of the two types of rare transition missense variants (A-to-G/T-to-C and G-to-A/C-to-T), and comparison between proportions of SNP sites with the ADAR motif for different deleterious effects of G-to-A/C-to-T and non-G-to-A/C-to-T rare missense variants, respectively. *P* values were determined using two-tailed Fisher’s exact test (the second and fourth columns of each panel) or two-tailed Wilcoxon signed ranked test (the third column of each panel). Significance: ****P* value < 0.001.

**Supplemental Figure S9.** Relationship between the distributions of different types of rare missense variants and A-to-G RNA editing in different human subpopulations: (A) Americas (AMR), (B) Southern Asians (SAS), (C) East Asians (EAS), (D) Europeans (EUR), and (E) Africans (AFR). For each panel, from left to right, the columns represented correlation between the distributions of different types of rare missense variants from the subpopulation and deleteriousness of the corresponding genomic changes, the ƒ(G-to-A/C-to-T)/ƒ(A-to-G/T-to-C) ratios for different deleterious effects of the genomic changes, Comparisons of the individual mutational burden of the two types of rare transition missense variants (A-to-G/T-to-C and G-to-A/C-to-T) in the subpopulation, and comparison between proportions of SNP sites with the ADAR motif for different deleterious effects of G-to-A/C-to-T and non-G-to-A/C-to-T rare missense variants, respectively. *P* values were determined using two-tailed Fisher’s exact test (the second and fourth columns of each panel) or two-tailed Wilcoxon signed ranked test (the third column of each panel). Significance: ****P* value < 0.001.

**Supplemental Figure S10.** Ratios of the number of RNA-DNA variant events at SNP sites with deleterious (CADD score > 10) genomic changes to those at SNP sites with neutral/harmless (CADD score ≤ 10) ones for G-to-A/C-to-T RNA-DNA variant events at A-to-G/T-to-C SNP sites and A-to-G/T-to-C RNA-DNA variant events at G-to-A/C-to-T SNP sites. *P* values were determined using *Chi*-square test.

**A B**

**C D**

**Supplemental Figure S11.** Effect of Mr. Eel mutation rates on the relationship between the distribution of six SNP types and the corresponding CADD scores. (A) Comparisons of mutation rates at sites with different SNP types. (B) Spearman’s ρ between mutation rates and CADD scores of the sites with rare missense mutations before and after controlling for SNP types. (C) Relationships between the distribution of six SNP types and the corresponding CADD scores (left) and between ƒ(G-to-A/C-to-T)/ƒ(A-to-G/T-to-C) ratios and the corresponding CADD scores (right) in sites with low and high mutation rates. (D) ƒ(G-to-A/C-to-T)/ƒ(A-to-G/T-to-C) ratios with excluding sites at CpG dinucleotides for different deleterious effects of the genomic changes. *P* values were determined using two-tailed Wilcoxon rank-sum test (A) or two-tailed Fisher’s exact test ((C) and (D)). Significance: ****P* value < 0.001.

**A**

**B**

**Supplemental Figure S12.** Relationship between the distributions of different types of rare missense variants and A-to-G RNA editing in first and non-first coding exons: (A) the first and (B) internal/last exons. For each panel, from left to right, the columns represented correlation between the distributions of different types of rare missense variants from the subpopulation and deleteriousness of the corresponding genomic changes, the ƒ(G-to-A/C-to-T)/ƒ(A-to-G/T-to-C) ratios for different deleterious effects of the genomic changes, comparisons of the individual mutational burden of the two types of rare transition missense variants (A-to-G/T-to-C and G-to-A/C-to-T) in the subpopulation, and comparison between proportions of SNP sites with the ADAR motif for different deleterious effects of G-to-A/C-to-T and non-G-to-A/C-to-T rare missense variants, respectively. *P* values were determined using two-tailed Fisher’s exact test (the second and fourth columns of each panel) or two-tailed Wilcoxon signed ranked test (the third column of each panel). Significance: ****P* value < 0.001.

**A B**

**Supplemental Figure S13.** Median editing levels of different phylogenetic types of nonsynonymous A-to-G editing sites extracted from (A) this study and (B) Xu and Zhang’s study (Xu and Zhang 2014). For (B), we downloaded the data from Xu and Zhang’s study (Xu and Zhang 2014) and evaluated the statistically significant difference between the hardwired and diversified sites. The number of nonsynonymous editing sites examined in each group were provided in parentheses. *P* values were determined using two-tailed Wilcoxon rank-sum test. **P* value < 0.05, ***P* value < 0.01, ****P* value < 0.001. NS, not significant.

**Supplemental Figure S14.** Comparisons of synonymous editing level (median level) at A/G genomic variant sites with harmless (CADD score≤10) and deleterious (CADD score >10) A-to-G/G-to-A reference-to-alternative allele changes in the LCL population. The number of synonymous editing sites examined in each group was provided in parentheses. *P* values were determined using two-tailed Wilcoxon rank-sum test. NS, not significant.

**Supplementary Tables**

**Supplemental Table S1.** Comparisons of median RNA editing levels for the A/G SNP sites with different allele frequency of A (0-0.33 (A<<G), 0.33-0.66 (A≈G), 0.66-1 (A>>G)) for each group of genes with stronger (highlighted with red color) or weaker strength of selective constraints/functional importance.

|  | | **Allele frequency of A** | | | | | |
| --- | --- | --- | --- | --- | --- | --- | --- |
| **0.00-0.33**  **(A<<G)** |  | **0.33-0.66**  **(A≈G)** |  | **0.66-1.00**  **(A>>G)** |  |
| **Evolutionary rate** | |  |  |  |  |  |  |
| *d*N*/d*S  (Human-Macaque) | **low** | **0.188** | ***** | **0.136** |  | **0.087** | ***** |
| high | 0.081 | 0.158 |  | 0.100 |
| *d*N*/d*S  (Human-Mouse) | **low** | **0.202** |  | **0.141** |  | **0.083** | ****** |
| high | 0.095 | 0.150 |  | 0.100 |
| PhyloP | **high** | **0.174** |  | **0.143** |  | **0.087** | ******* |
| low | 0.145 | 0.142 |  | 0.104 |
| phastCons | **high** | **0.174** |  | **0.153** |  | **0.088** | ****** |
| low | 0.145 | 0.136 |  | 0.100 |
|  | |  |  |  |  |  |  |
| **Functional importance** | |  |  |  |  |  |  |
| Essential genes? | **Yes** | **0.179** |  | **0.166** |  | **0.086** |  |
| No | 0.116 | 0.125 |  | 0.095 |  |
| Expression level | **high** | **0.188** | ***** | **0.160** | ******* | **0.092** | ****** |
| low | 0.079 | 0.100 | 0.080 |
| pLI | ≥**0.9** | **0.228** | ***** | **0.151** |  | **0.085** |  |
| < 0.9 | 0.123 | 0.139 |  | 0.086 |  |
| Pleiotropic? | **Yes** | **NA** |  | **0.341** |  | **0.088** |  |
| No | 0.228 |  | 0.100 |  | 0.087 |  |

Note. *P* values were determined using two-tailed Wilcoxon rank-sum test. Significance: **P* value ≤ 0.05, ***P* value ≤ 0.01, and ****P* value ≤ 0.001. “NA” denoted that the sites are unavailable.

**Supplemental Table S2.** Numbers of six types of rare missense mutations with different deleterious effects in the 1000 Genome project. The number of all possible nonsynonymous genomic changes in all human coding regions in each group is provided in parentheses.

| **Type of missense mutations** | **A→G/T→C** | **G→A/C→T** | **A→C/T→G** | **A→T/T→A** | **C→A/G→T** | **G→C/C→G** |
| --- | --- | --- | --- | --- | --- | --- |
| **All individuals**  (CADD score) | | | | | | |
| ≤10 | 25446 (303988) | 30112 (366956) | 5234 (278226) | 3889 (278709) | 6637 (410319) | 10441 (485998) |
| 10-15 | 11833 (473268) | 20506 (526675) | 3001 (538707) | 2265 (461096) | 4391 (579463) | 6145 (683555) |
| 15-20 | 9339 (803399) | 20105 (833101) | 2625 (973526) | 2114 (885063) | 4266 (1064366) | 5376 (1229312) |
| 20-25 | 22613 (3651357) | 60511 (3313560) | 7214 (4414669) | 5875 (4028867) | 11989 (4445687) | 14647 (5103229) |
| 25-30 | 12228 (2429091) | 39325 (1859470) | 4058 (2925705) | 3952 (2812671) | 7247 (2184435) | 7765 (2354888) |
| >30 | 778 (785182) | 30089 (431808) | 249 (828022) | 770  (749112) | 2894 (478421) | 1361 (478416) |
| (SIFT score) | | | | | | |
| Tolerated | 52402 (2454627) | 115389 (2169055) | 12458 (2650079) | 9887 (2257639) | 20542 (2443158) | 27448 (3053069) |
| Deleterious | 28375 (2147736) | 80985 (1858351) | 9512 (2802210) | 8623 (2766563) | 16012 (2583204) | 17282 (2639555) |
| **Americas (AMR)**  (CADD score) | | | | | | |
| ≤10 | 4732 (303988) | 5755 (366956) | 940 (278226) | 712 (278709) | 1156 (410319) | 1918 (485998) |
| 10-15 | 2079 (473268) | 3826 (526675) | 511 (538707) | 366 (461096) | 715 (579463) | 1076 (683555) |
| 15-20 | 1623 (803399) | 3730 (833101) | 441 (973526) | 380 (885063) | 761 (1064366) | 958 (1229312) |
| 20-25 | 3830 (3651357) | 10902 (3313560) | 1203 (4414669) | 927 (4028867) | 2010 (4445687) | 2462 (5103229) |
| 25-30 | 1930 (2429091) | 6732 (1859470) | 669 (2925705) | 603 (2812671) | 1192 (2184435) | 1220 (2354888) |
| >30 | 141 (785182) | 5089 (431808) | 28  (828022) | 116  (749112) | 459 (478421) | 204 (478416) |
| **Southern Asians (SAS)**  (CADD score) | | | | | | |
| ≤10 | 5550 (303988) | 6941 (366956) | 1115 (278226) | 835 (278709) | 1430 (410319) | 2164 (485998) |
| 10-15 | 2523 (473268) | 4681 (526675) | 669 (538707) | 476 (461096) | 944 (579463) | 1324 (683555) |
| 15-20 | 1989 (803399) | 4764 (833101) | 548 (973526) | 431 (885063) | 908 (1064366) | 1154 (1229312) |
| 20-25 | 5007 (3651357) | 14216 (3313560) | 1499 (4414669) | 1242 (4028867) | 2693 (4445687) | 3179 (5103229) |
| 25-30 | 2628 (2429091) | 9163 (1859470) | 860 (2925705) | 932 (2812671) | 1598 (2184435) | 1725 (2354888) |
| >30 | 147 (785182) | 6993 (431808) | 58  (828022) | 147  (749112) | 616 (478421) | 301 (478416) |
| **East Asians (EAS)**  (CADD score) | | | | | | |
| ≤10 | 5324 (303988) | 6235 (366956) | 1072 (278226) | 810 (278709) | 1335 (410319) | 2059 (485998) |
| 10-15 | 2491 (473268) | 4457 (526675) | 661 (538707) | 490 (461096) | 874 (579463) | 1217 (683555) |
| 15-20 | 1964 (803399) | 4325 (833101) | 573 (973526) | 441 (885063) | 861 (1064366) | 1080 (1229312) |
| 20-25 | 4886 (3651357) | 13370 (3313560) | 1551 (4414669) | 1317 (4028867) | 2514 (4445687) | 3034 (5103229) |
| 25-30 | 2748 (2429091) | 8837 (1859470) | 873 (2925705) | 873 (2812671) | 1528 (2184435) | 1628 (2354888) |
| >30 | 169 (785182) | 6888 (431808) | 62  (828022) | 187  (749112) | 616 (478421) | 306 (478416) |
| **Europeans (EUR)**  (CADD score) | | | | | | |
| ≤10 | 4454 (303988) | 5612 (366956) | 996 (278226) | 715 (278709) | 1187 (410319) | 1830 (485998) |
| 10-15 | 2172 (473268) | 3849 (526675) | 528 (538707) | 400 (461096) | 794 (579463) | 1079 (683555) |
| 15-20 | 1714 (803399) | 3770 (833101) | 490 (973526) | 404 (885063) | 747 (1064366) | 953 (1229312) |
| 20-25 | 4221 (3651357) | 11789 (3313560) | 1393 (4414669) | 1119 (4028867) | 2130 (4445687) | 2704 (5103229) |
| 25-30 | 2349 (2429091) | 8071 (1859470) | 827 (2925705) | 758 (2812671) | 1345 (2184435) | 1490 (2354888) |
| >30 | 147 (785182) | 6273 (431808) | 55  (828022) | 138  (749112) | 568 (478421) | 269 (478416) |
| **Africans (AFR)**  (CADD score) | | | | | | |
| ≤10 | 8253 (303988) | 10258 (366956) | 1703 (278226) | 1222 (278709) | 2179 (410319) | 3475 (485998) |
| 10-15 | 3743 (473268) | 6708 (526675) | 925 (538707) | 701 (461096) | 1423 (579463) | 2019 (683555) |
| 15-20 | 2916 (803399) | 6548 (833101) | 801 (973526) | 626 (885063) | 1391 (1064366) | 1702 (1229312) |
| 20-25 | 6675 (3651357) | 19016 (3313560) | 2154 (4414669) | 1702 (4028867) | 3637 (4445687) | 4433 (5103229) |
| 25-30 | 3453 (2429091) | 11881 (1859470) | 1172 (2925705) | 1072 (2812671) | 2159 (2184435) | 2268 (2354888) |
| >30 | 220 (785182) | 8796 (431808) | 61  (828022) | 220  (749112) | 805 (478421) | 375 (478416) |

**Supplemental Table S3.** Individual mutational burden analysis of the two types of rare transition missense variants (A-to-G/T-to-C and G-to-A/C-to-T) in the 1000 genome project.

| **Deleterious effect** | **Effect size*** | **Effect size 95% CI low** | **Effect size 95% CI high** | ***P* value** |
| --- | --- | --- | --- | --- |
| **All individuals**  (CADD score) | | | | |
| ≤10 | 0.971 | 0.912 | 1.029 | < 10-15 |
| 10-15 | 1.532 | 1.469 | 1.595 | < 10-15 |
| 15-20 | 1.890 | 1.823 | 1.956 | < 10-15 |
| 20-25 | 2.628 | 2.553 | 2.704 | < 10-15 |
| 25-30 | 2.853 | 2.774 | 2.932 | < 10-15 |
| >30 | 3.835 | 3.742 | 3.929 | < 10-15 |
| (SIFT score) | | | | |
| Tolerated | 0.971 | 0.912 | 1.029 | < 10-15 |
| Deleterious | 1.532 | 1.469 | 1.595 | < 10-15 |
| **Americas (AMR)**  (CADD score) | | | | |
| ≤10 | 1.164 | 1.030 | 1.297 | < 10-15 |
| 10-15 | 1.812 | 1.665 | 1.959 | < 10-15 |
| 15-20 | 2.367 | 2.206 | 2.529 | < 10-15 |
| 20-25 | 4.621 | 4.384 | 4.858 | < 10-15 |
| 25-30 | 3.899 | 3.689 | 4.110 | < 10-15 |
| >30 | 4.756 | 4.514 | 4.998 | < 10-15 |
| **Southern Asians (SAS)**  (CADD score) | | | | |
| ≤10 | 1.134 | 0.998 | 1.269 | < 10-15 |
| 10-15 | 2.174 | 2.016 | 2.333 | < 10-15 |
| 15-20 | 2.667 | 2.494 | 2.839 | < 10-15 |
| 20-25 | 4.757 | 4.512 | 5.003 | < 10-15 |
| 25-30 | 4.008 | 3.790 | 4.225 | < 10-15 |
| >30 | 5.009 | 4.754 | 5.265 | < 10-15 |
| **East Asians (EAS)**  (CADD score) | | | | |
| ≤10 | 0.605 | 0.479 | 0.732 | < 10-15 |
| 10-15 | 1.788 | 1.642 | 1.934 | < 10-15 |
| 15-20 | 2.159 | 2.003 | 2.314 | < 10-15 |
| 20-25 | 4.526 | 4.293 | 4.760 | < 10-15 |
| 25-30 | 3.988 | 3.774 | 4.202 | < 10-15 |
| >30 | 4.961 | 4.711 | 5.210 | < 10-15 |
| **Europeans (EUR)**  (CADD score) | | | | |
| ≤10 | 1.164 | 1.030 | 1.297 | < 10-15 |
| 10-15 | 1.812 | 1.665 | 1.959 | < 10-15 |
| 15-20 | 2.367 | 2.206 | 2.529 | < 10-15 |
| 20-25 | 4.621 | 4.384 | 4.858 | < 10-15 |
| 25-30 | 3.899 | 3.689 | 4.110 | < 10-15 |
| >30 | 4.756 | 4.514 | 4.998 | < 10-15 |
| **Africans (AFR)**  (CADD score) | | | | |
| ≤10 | 1.333 | 1.214 | 1.452 | < 10-15 |
| 10-15 | 3.123 | 2.962 | 3.284 | < 10-15 |
| 15-20 | 3.467 | 3.296 | 3.638 | < 10-15 |
| 20-25 | 6.085 | 5.829 | 6.341 | < 10-15 |
| 25-30 | 5.104 | 4.882 | 5.327 | < 10-15 |
| >30 | 5.483 | 5.247 | 5.718 | < 10-15 |

*Effect sizes were measured by Cohen’s *d*, which was defined as the difference between both mean numbers of these two types of rare missense variants (A-to-G/T-to-C and G-to-A/C-to-T) divided by the standard deviation (SD) of the paired differences. *P* values were determined using two-tailed Wilcoxon signed ranked test. 95% CI, 95% confidence interval.

**Reference**

Xu G, Zhang J. 2014. Human coding RNA editing is generally nonadaptive. *Proc Natl Acad Sci U S A* **111**: 3769-3774.
