# Supplementary material for: A-to-I RNA editing contributes to the persistence of predicted damaging mutations in populations
Source: HighWire-hosted journal article supplement (doi:10.1101/gr.246033.118), 2019-09-12
Supplement: Supplemental_File_S1_20190904.xlsx [file Supplemental_File_S1_20190904.xlsx]

## Sheet: All detected AtoG editing sites
	All Human A-to-G RNA editing sites identified in 447LCLs
	Chromosome	Position	Editing Type	Strand	Individual (ID) with the editing site	# of individual with the editing site	RADAR	DARNED	REDIportal
	1	961652	AtoG	+	HG00338,HG00349,NA19225	3	0	0	0
	1	1014228	AtoG	+	HG00178,HG00237,NA07000,NA19225,NA19235	5	0	0	0
	1	1203822	AtoG	-	NA19225,NA20799	2	0	0	0
	1	1221498	AtoG	-	NA19197,NA12340,NA18498,NA19159,NA20509,HG00117,NA12282,NA12283,NA18486,NA12761,NA19095,NA18934,NA20527,NA19213,HG00259,NA19223,NA18909,NA06986,HG00355,NA20765,NA12751	21	1	0	1
	1	1221502	AtoG	-	NA18909,NA19223,HG00259,HG00355,NA19197,NA12399,NA20765,NA18498,NA12283,NA20527,NA06986,HG00117,NA18934,NA19159,NA19213,NA19095,NA12751,NA12761	18	1	1	1
	1	1268802	AtoG	-	NA18486,NA19095,NA19159	3	1	1	1
	1	1316158	AtoG	-	HG00384,HG00338,HG00277,NA19143,NA18511,NA12283,HG00261,HG00306,NA19131,NA19141,HG00233	11	1	1	1
	1	1316160	AtoG	-	NA18511,HG00183,HG00338,HG00261,HG00313,HG00306,NA12283,NA19197,HG00373,HG00233,HG00384,NA19141	12	1	1	1
	1	1316199	AtoG	-	HG00313,HG00261,NA12283,HG00373,NA19131	5	1	1	1
	1	1316230	AtoG	-	NA20541,NA12761,NA07357,NA19129,NA20513,NA19131,HG00236,NA19141,NA19143,HG00143,NA12762,HG00384,HG00373,NA19200,HG00281,NA19223,HG00338,HG00306,HG00285,HG00313,HG00335,NA12273,NA20531,HG00233,NA12399,NA19197,NA19172,NA19175,NA06986,HG00277,HG00358,HG00252,NA20761,HG00183,NA18511,HG00180,NA20588,HG00100,HG00324,HG00328,NA19107	41	1	1	1
	1	1316251	AtoG	-	HG00306,NA19197,HG00373,NA19131,HG00261,HG00277,HG00233,HG00183	8	1	1	1
	1	1316397	AtoG	-	NA19149,HG00183,NA20534,NA18870	4	1	1	1
	1	1316461	AtoG	-	HG00131,NA11830,HG00268,NA20532,NA20514,NA19197,NA20809,NA18502,NA11930,HG00277,NA18873,NA12058,NA19131,HG00141,NA19198,NA06986,NA19143,NA19223	18	1	1	1
	1	1316464	AtoG	-	NA20514,NA18873,NA19223,HG00237,HG00117,NA12814,NA19189,HG00260,HG00189,NA20766,HG00262,NA12872,NA12058,NA18934,HG00309,HG00321,NA12815,HG00234,NA11843,NA20541,NA18511,NA11930,NA19197,NA12413,NA19141,NA20765,NA07048,HG00141,HG00097,NA19159,NA19117,NA11830,NA19131,NA19206,HG00361,NA19146,NA20532,HG00142,NA06994,NA12275,HG00325,HG00131,HG00369,NA20527,HG00324	45	1	1	1
	1	1316467	AtoG	-	NA19131,HG00309,NA12058,HG00321,HG00182,NA12815,NA11830,NA12413,HG00141,HG00142,NA20532,NA19206,NA19159,HG00189,NA19197,HG00325,HG00259,HG00375,NA11930,HG00131,NA19146,NA20766,NA18934,NA20527,HG00324,NA18873,NA19138,NA07037,HG00097,NA20765	30	0	1	1
	1	1316477	AtoG	-	NA20530,NA19153,NA20765,NA20532,NA12058,HG00114	6	1	1	1
	1	1316534	AtoG	-	HG00233,NA12058,HG00119,HG00183,HG00114,NA20527,HG00260,NA12761,NA19197,NA07048,HG00125,HG00285,HG00239,HG00339,NA20771,NA19189,NA20530,NA19108,NA18873,HG00177,NA19131,NA19223,NA18505,HG00379	24	1	1	1
	1	1316547	AtoG	-	NA20588,HG00260,NA19131,HG00239,HG00110,HG00183,NA18499,NA18486,HG00146,HG00234,NA12058	11	1	1	1
	1	1316800	AtoG	-	HG00117,NA20795,NA06986,NA19095,NA20527,HG00355,NA12283,HG00260,HG00105,NA20765,HG00328,NA12873	12	1	1	1
	1	1317061	AtoG	-	NA12763,NA19095,HG00111,NA06994,NA20532,NA19256,HG00142,HG00259,NA19197,NA18934,NA12842,HG00101,NA20527,NA18486,HG00137,NA18498,HG00321,NA19141,NA19248,HG00355,NA12156,NA20530,HG00157,NA19143,NA18870,HG00236,NA20509,HG00234,NA18916,NA19108,NA19131,NA20810,NA06986,NA19225,NA19130,NA20765,NA07048,HG00141,NA12286,HG00245,NA19107,HG00097,NA12716,NA19118,HG00263,NA20787,NA19159,NA18502,NA11893,HG00183…	57	1	1	1
	1	1317063	AtoG	-	NA18934,NA19141,NA12283,NA18498,NA12761,NA18502,NA20787,NA12156,HG00141,NA07048,HG00236,HG00245,HG00355,NA20532,NA20530,HG00101,NA19130,NA20765,NA18486,NA19143,NA20509,NA19131,NA19209,NA19159,NA07037,HG00097,NA06994,HG00263,NA18870,NA12286,HG00234,NA12716,NA18868,HG00157,NA20527,NA06986,NA11830,NA19118,NA12842,HG00321,HG00117,NA18916,NA19095,HG00361,HG00111,HG00137,NA19116,NA11893,NA20810,NA19256…	54	1	1	1
	1	1317088	AtoG	-	NA20765,NA19223,HG00361,NA06986,NA19116,NA12286,HG00355,NA11831,NA20787,HG00137,HG00117,HG00141,HG00309,NA19143,NA18498,HG00111,NA19095,HG00112,HG00236,NA18916,HG00315,NA19098,HG00157,NA19197,NA18934,NA06994,NA12058,NA19107,NA12761,NA20527	30	1	1	1
	1	1317133	AtoG	-	NA06994,NA20513,NA12761,NA20527,HG00355,NA20765,HG00114,NA20787,NA19206,NA19147	10	1	1	1
	1	1317207	AtoG	-	NA20812,NA19108,NA20527,NA06986,NA19095,HG00355,NA19197,HG00365,NA12286	9	1	1	1
	1	1317270	AtoG	-	HG00187,NA12399,HG00260	3	1	0	1
	1	1317272	AtoG	-	HG00187,HG00260,HG00344,NA19213	4	1	0	1
	1	1317282	AtoG	-	HG00183,NA19213,NA12399	3	1	0	1
	1	1317343	AtoG	-	NA12399,HG00183,HG00344,NA19213,HG00260	5	1	1	1
	1	1317369	AtoG	-	HG00344,HG00183,HG00187	3	1	1	1
	1	1317933	AtoG	-	HG00325,NA19131,NA18916,NA19143	4	1	1	1
	1	1317934	AtoG	-	HG00325,NA18916	2	0	1	1
	1	1317938	AtoG	-	HG00325,NA19143	2	1	1	1
	1	1317955	AtoG	-	NA18916,HG00183	2	1	1	1
	1	1317963	AtoG	-	HG00234,NA19143,HG00183	3	1	1	1
	1	1317977	AtoG	-	HG00183,HG00325,NA19143,HG00234,NA19131	5	1	1	1
	1	1318006	AtoG	-	HG00234,NA19131,NA19143	3	1	1	1
	1	1318142	AtoG	-	HG00355,NA19095,NA19144,HG00325	4	1	1	1
	1	1318143	AtoG	-	NA20527,NA19095,HG00355,HG00325	4	1	1	1
	1	1318401	AtoG	-	HG00260,HG00183,NA20588,HG00285,NA12749,HG00343,NA12399,HG00146,NA19138,NA18499,NA19222,NA19198,NA18486,NA19197,NA06986,NA19247,NA20765	17	1	1	1
	1	1318413	AtoG	-	HG00373,HG00344,HG00343,HG00146,NA19256	5	1	1	1
	1	1318423	AtoG	-	NA12762,NA19152,HG00375,HG00285,NA19095,NA19130,HG00117,HG00234,HG00325,NA12750,HG00315,NA12749,NA18934,NA19099,NA19117,HG00306,HG00332,NA11831,HG00344,NA20527,NA19247,NA19256,NA18502,NA12156,HG00373,HG00131,NA20814,NA20588,HG00233,NA20532,HG00183,NA20759,HG00358,HG00187,NA19171,NA19121,NA19159,HG00146,HG00328,HG00321	40	1	1	1
	1	1318489	AtoG	-	HG00183,NA20532,HG00358,HG00146,NA19121,HG00373,NA12399,HG00325,HG00355	9	1	0	1
	1	1318498	AtoG	-	NA19247,NA19143,HG00260	3	1	0	1
	1	1318511	AtoG	-	NA19256,NA18916,HG00373,NA11831,NA19095,NA06986,NA18868,HG00114,NA19131,HG00343	10	1	0	1
	1	1318534	AtoG	-	HG00119,HG00236,NA20800,HG00114,NA11831,HG00117,HG00358,NA12762,HG00277	9	1	0	1
	1	1318564	AtoG	-	NA19107,HG00100,NA20536,NA11893,HG00309,NA12815,NA19152,NA12399,HG00142,HG00131,NA20509,NA20531,HG00114,HG00325,HG00250,NA19146,NA19143,NA20530,NA20527,HG00369,NA12749,NA19256,NA20814,HG00234,NA18934,HG00355,HG00260,NA19223,HG00332,HG00111,HG00321,NA20519,NA20588,NA19095,NA12058,HG00342,NA19247,NA19159,NA19198,NA12761,NA19131,HG00379,NA20513,NA07347,NA12763,NA19130,NA20811,HG00365,NA07357,NA20765…	75	1	1	1
	1	1318576	AtoG	-	HG00325,HG00355,NA19159,NA20527,NA19256,HG00183,HG00234,NA12761,NA19143,NA20509,NA19121,NA11893,NA11831,NA20765	14	1	1	1
	1	1318596	AtoG	-	NA18934,NA12842	2	1	0	1
	1	1318636	AtoG	-	HG00137,NA19159,NA11893,NA19095,NA19131,NA18511,HG00245,NA20765,HG00259,NA12761,NA18486,HG00234,HG00355,NA06986,HG00343,HG00117,NA20527	17	1	1	1
	1	1402786	AtoG	-	NA18498,HG00146,HG00137,HG00138,NA06994,NA12058,NA07048,NA20772,HG00268,NA18511,HG00119,NA20527,HG00321,HG00133,HG00117,NA12717,HG00236,NA11930,NA20588,HG00244,NA12282,HG00111,NA18486,NA20532,HG00259,NA19159,HG00131,NA20509,HG00233,NA06986,HG00245,HG00142,NA18934,HG00338,NA19095,NA19223,NA19116,NA19118,HG00355,HG00309,NA07357,NA20765	42	1	1	1
	1	1402813	AtoG	-	HG00111,HG00355	2	1	1	1
	1	1402820	AtoG	-	HG00111,HG00355	2	1	1	1
	1	1403017	AtoG	-	HG00355,NA06986,NA20527	3	1	1	1
	1	1403091	AtoG	-	HG00355,NA06986	2	1	0	1
	1	1403304	AtoG	-	NA19159,NA06986,NA12058,NA19095,HG00117,HG00355,HG00111	7	1	1	1
	1	1403319	AtoG	-	NA20527,HG00355	2	1	1	1
	1	1403340	AtoG	-	HG00355,NA06986	2	1	0	1
	1	1403372	AtoG	-	NA06986,HG00117,HG00131,HG00355,NA20527	5	1	1	1
	1	1403376	AtoG	-	HG00131,HG00355	2	1	0	1
	1	1403382	AtoG	-	NA06986,HG00131,NA12058,HG00355,HG00117	5	1	1	1
	1	1403404	AtoG	-	HG00131,NA19147,NA20532,NA06986,NA19131,NA20771,NA20765,NA19095,NA18934,NA20527,NA12058,HG00259,HG00355,HG00238,HG00117,NA20588	16	1	1	1
	1	1403471	AtoG	-	NA20527,HG00355	2	1	1	1
	1	1404639	AtoG	-	NA19116,NA06986,HG00325,NA19200,HG00133,NA18912,NA12815	7	1	0	1
	1	1404675	AtoG	-	HG00325,NA12750	2	1	0	1
	1	1404702	AtoG	-	NA19095,NA19118,HG00117	3	1	1	1
	1	1404728	AtoG	-	HG00117,NA19095	2	1	1	1
	1	1404741	AtoG	-	HG00277,HG00373,NA19095,HG00117	4	1	0	1
	1	1404755	AtoG	-	NA18511,HG00117	2	1	1	1
	1	1404765	AtoG	-	HG00306,HG00137	2	1	0	1
	1	1405193	AtoG	-	NA12716,NA20527,NA19107	3	1	1	1
	1	1405316	AtoG	-	NA07357,NA19190	2	0	0	1
	1	1409102	AtoG	+	NA19256,NA19214,NA19236,NA19108,NA19107	5	0	0	0
	1	1409140	AtoG	+	NA12716,HG00373,NA20534,NA12283,HG00119,NA19236,HG00111,HG00117,HG00109,NA12815,NA20530,NA20828,HG00355,NA20527,HG00315,NA18934,NA11894,HG00244,HG00234,NA18508,NA20765,NA20787,NA12814,HG00313,HG00138,NA19256	26	1	0	1
	1	1409141	AtoG	+	NA12283,HG00233,HG00373,NA20765,NA20787,HG00138,NA12814,NA18508,HG00234,NA18934,HG00117,NA19108,HG00239,NA12716,NA18908,NA19131,NA20534,HG00109,NA19118	19	1	0	1
	1	1409142	AtoG	+	NA18934,NA20765	2	0	0	0
	1	1409143	AtoG	+	NA18934,HG00234,HG00244	3	1	0	1
	1	1409148	AtoG	+	HG00315,NA18934,NA11894,NA20527,HG00138,NA19131,NA12156,NA20534,NA12283	9	1	0	1
	1	1409159	AtoG	+	NA19256,NA19107,NA19236,NA19108,NA18508	5	0	0	0
	1	1409230	AtoG	+	NA20527,HG00117,NA10847,NA18934	4	0	0	0
	1	1409293	AtoG	+	NA12751,NA20527	2	1	0	1
	1	1409306	AtoG	+	NA12156,HG00355,NA18502	3	0	0	0
	1	1409362	AtoG	+	NA19256,NA19095	2	1	0	1
	1	1409369	AtoG	+	NA19095,NA20527,NA12814,HG00355	4	1	0	1
	1	1409377	AtoG	+	NA20527,NA12751,NA19095,NA18502,NA19256,NA12814,HG00355,NA12763	8	1	0	1
	1	1409385	AtoG	+	NA12814,NA19256,NA12763,HG00355,NA20527	5	1	0	1
	1	1409483	AtoG	+	NA20527,HG00355,NA12763	3	1	0	1
	1	1409513	AtoG	+	NA12763,HG00355,NA20527,HG00313	4	1	0	1
	1	1409556	AtoG	+	NA20530,HG00313	2	1	0	1
	1	1409618	AtoG	+	NA18868,NA20527,NA20588,NA12814,HG00378,NA12045,HG00119,NA20538,HG00111,HG00356,NA18486,HG00238,HG00131,NA12282,NA19198,NA20797,NA18934,HG00338,NA20828,NA20530,HG00237,NA12751,HG00234,HG01334,HG00239,NA20515,NA12044,NA07037,NA06994,HG00313,NA12156,NA11894,NA11832,NA19159,HG00262,HG00315,NA20756,NA19095,NA20771,HG00117,NA12762,NA19130,HG00325,NA07000,HG00328,HG00366,NA12889,NA12763,NA19117,NA18498…	54	1	0	1
	1	1409620	AtoG	+	NA20756,HG00378,NA19198,HG00239,NA11832,HG00119	6	1	0	1
	1	1409621	AtoG	+	HG00366,NA12889,NA06994,NA07000,NA18498,HG00111,NA20527,NA19117,NA11894,HG00262,NA18934,NA12045,HG00237,NA20530,NA12044,NA12751,NA20771,NA12763,NA18868,NA20515,NA12058,HG00328,NA19095,NA12156,HG00119,NA18486,NA07347,NA07037,NA20828,NA12762,NA19130,NA12282,HG00131,HG00238,NA20538,NA12814,NA20799,NA20756,HG00325,HG01334,HG00133,HG00338,NA19198,NA20797,HG00239,HG00356,HG00234,HG00313,NA19159,HG00315…	51	1	0	1
	1	1409622	AtoG	+	HG01334,HG00133,NA12156,NA19198,NA20797,NA18934,HG00356,NA20538,NA11894,NA20588,NA07037,NA18498,HG00262,NA12889,NA19095,HG00315,NA20799,NA20527,HG00328,HG00366,HG00117,HG00378,NA20530,NA18486,NA12058,NA07347,HG00131	27	1	0	1
	1	1409626	AtoG	+	NA12156,HG00131,HG00237,NA12044,NA12889,NA07000,NA20530,NA12814,HG00234,NA12058,HG00378,HG00117,NA12763,HG00133	14	1	0	1
	1	1409671	AtoG	+	NA12045,HG00234,NA06994,NA12763,NA18868,HG00325,HG00328,NA20771,NA12889,NA19159,NA11832,HG00117,NA07000,HG00237,HG00366,NA20588,NA07037,NA19130,NA18486,NA19117,NA11894,NA20515,NA18934,NA20828,HG00238,NA12762,NA20797,NA12282,HG00111,NA12058,HG00338,NA12751,HG00378	33	1	0	1
	1	1483031	AtoG	+	NA18488,HG00097,NA19214,NA19093,NA19095,NA12750,HG00117,NA20513,NA12814,HG01334,NA20536,NA19107,NA19121,HG00139,NA19197,HG00101,NA20812,HG00339,HG00369,HG00361,HG00315,HG00355,NA20527,HG00141,NA12058,HG00119,NA20765,NA18505,HG00244,NA12399,NA18502,NA20588,NA06986	33	1	0	1
	1	1483040	AtoG	+	HG00355,NA07347,HG00139	3	1	1	1
	1	1483075	AtoG	+	NA19131,HG00234,HG01334,NA20532,NA20527,HG00099,HG00309,HG00142,NA20509,NA07048,NA19159,NA18511,HG00097,HG00117,HG01789,NA19095,NA19114,NA19141,NA20796,NA12716,NA06986,NA12399,NA19222,HG00355	24	1	0	1
	1	1483078	AtoG	+	NA18934,NA19116,NA18868,NA19222,NA07048,HG00119,HG00355,HG00117,HG00101,NA20787,HG00097,HG00234,NA20527	13	1	1	1
	1	1483114	AtoG	+	NA19143,NA12873	2	1	1	1
	1	1483150	AtoG	+	NA12873,HG00361,NA19213,HG00366,NA19159	5	1	0	1
	1	1483152	AtoG	+	HG00376,HG00355,HG00384,HG00366,NA06986,HG00234,HG00117,NA11930,NA12716,NA19141,HG00325,NA19143,HG00309,NA12282,HG00361,NA12156,NA20765,NA19114,NA19213,NA18502,NA18934,NA19095,NA20532,NA19108	24	1	1	1
	1	1483153	AtoG	+	NA20532,NA12873	2	1	0	1
	1	1483156	AtoG	+	NA06986,HG00365,HG00366,HG00277,NA19223,HG00378,HG00376,NA20800,NA18934,NA20527,NA18909,NA18511,NA12399,HG00240,HG00339,HG00100,NA12716,HG00117,HG00234,NA19213,HG00355,NA19108,NA20532,NA18486,NA18502,HG00139,HG00315,NA19197,NA19172,NA19121,NA20513,NA19159,HG00325,HG00126,NA19141,NA19153,NA19116,NA20509,NA19143,HG00143,NA12282,NA12156,NA20765,HG00361,HG00099,HG00309,HG00111,NA20814,NA11930,NA07347	50	1	1	1
	1	1483183	AtoG	+	HG00096,NA20800,HG01791,NA06986,NA12058,HG00309,NA20765,NA12282,NA12716,HG00355,HG00183,NA19114,NA19116,NA19121,HG00139,NA19197,NA19222,HG00131	18	1	0	1
	1	1483291	AtoG	+	HG00117,NA20513,NA19095,HG00234,HG00355	5	1	0	1
	1	1483320	AtoG	+	NA19206,NA19095,HG00149	3	1	0	1
	1	1483346	AtoG	+	NA06986,NA20532,NA12762,NA12763,NA18498,NA19095,HG00117,NA19121,HG00365,NA20765,NA18916,NA12750,HG00234,HG00321,NA19223,NA12716,HG00355,NA12751	18	1	1	1
	1	1483347	AtoG	+	NA06986,NA20772,NA12716,HG00262,NA12761,HG00117,HG00355,NA12750,NA20765	9	1	0	1
	1	1483377	AtoG	+	NA20765,NA19095,NA19206,NA12763	4	1	1	1
	1	1483408	AtoG	+	NA06986,HG00384,HG00149,HG00355,NA19206,NA19095,NA12763,HG00139,NA20527	9	1	1	1
	1	1483516	AtoG	+	HG00355,HG00234,HG00280	3	0	0	0
	1	1483517	AtoG	+	HG00139,NA06994,NA20796,NA12872,HG00133,NA12761,NA12751,HG00117,HG00355,HG00141,NA20527,NA19099,HG00261,NA19190,NA19129	15	1	0	1
	1	1483533	AtoG	+	NA20527,NA12763,HG00141,NA12761,HG00263,NA06994,NA18934,HG00355,HG00117	9	1	1	1
	1	1483539	AtoG	+	NA19095,HG00117,NA18934,HG00280,HG00234,NA20527,NA06994	7	1	0	1
	1	1483552	AtoG	+	NA12156,NA18934,NA06986	3	1	0	1
	1	1483562	AtoG	+	NA12156,HG00236,NA19147,HG00355,HG00321	5	1	1	1
	1	1483586	AtoG	+	HG00355,NA19095,NA06986,HG01789,NA20536,HG00141,HG01791,NA20588,NA20532,NA12751,HG00117,NA20798,NA18934,HG00376,NA20795,NA19198,NA20527	17	1	1	1
	1	1483596	AtoG	+	NA12156,HG00244	2	1	1	1
	1	1483597	AtoG	+	HG00355,HG00234,NA19198,NA20795,HG00117,HG00321,NA20527,HG00141,NA06994,HG00365,NA18502,NA20765,HG00376,NA06986	14	1	1	1
	1	1483607	AtoG	+	NA19095,HG00355,NA18502,NA20588,HG01791,NA12761,NA12763,HG00321,HG00127,NA20527	10	1	1	1
	1	1483610	AtoG	+	HG00141,HG00355,HG00263,NA19095,HG00127	5	1	0	1
	1	1483611	AtoG	+	NA12761,NA19198,HG00376	3	1	0	1
	1	1483612	AtoG	+	NA20765,NA12751,NA18502	3	1	0	1
	1	1483613	AtoG	+	HG00117,HG00365	2	1	0	1
	1	1483654	AtoG	+	NA19198,HG00117,NA20765	3	1	0	1
	1	1483680	AtoG	+	NA18934,NA19200,HG00234,HG00180,NA20513,NA20795,HG00309,NA12716,NA19159,HG00355,NA19141,NA19214,HG00119,NA20532,NA19213,NA06986,NA19257,HG00141,HG00183,HG00321,NA20531,HG00131,NA20527,HG00263,NA19204,NA06994,HG00259,NA19095,NA12751,NA19152,NA18916,HG00149,NA11930,NA20765,NA19118,NA19197,HG01791,HG00127,HG00117,HG00384,NA20588,HG00376,NA18511,NA12763	44	1	1	1
	1	1483681	AtoG	+	HG00240,NA19095,NA19141,HG00183,NA06986,NA19197,NA19159,NA12283,HG01791,HG00127,NA12716,NA18502,NA20795,HG00117,HG00277,HG00234,NA18870,HG00180,HG00263,NA20513,NA20527,NA19204,HG00259,NA06994,HG00119,HG00239,HG00365,NA18511,NA12763,NA19214,HG00309,HG00280,HG00141,HG00376,NA20588,HG00384,NA11832,NA19200,NA19257,NA20532,HG00321,NA19099,NA18934,NA19213,HG00355,NA12751,HG00369,NA19152,NA18916,NA20531…	55	0	1	1
	1	1483686	AtoG	+	HG00183,NA19118	2	1	0	1
	1	1483750	AtoG	+	NA20765,NA20541,NA12058,HG00369,HG00321,NA20514,NA12156,NA19146,HG00139,NA19121,NA20527,HG00355,NA06986,NA20513,NA20509,HG00325,NA12283,NA19152,HG00149,NA19159,HG00365,NA20795,HG00338,HG00117,NA19198,NA19095,NA19116,NA19223,HG00234,NA07357,NA12399,HG00313,HG00183	33	0	1	1
	1	1484236	AtoG	+	HG00360,NA19256,NA19131,NA06986	4	1	1	1
	1	1484245	AtoG	+	HG00355,NA19131,HG00360,NA20513	4	1	1	1
	1	1484251	AtoG	+	NA20795,HG00360,NA20527,NA19095,NA19223	5	1	1	1
	1	1484261	AtoG	+	NA20532,HG00355	2	1	0	1
	1	1484285	AtoG	+	NA19095,NA19256,NA06986	3	1	0	1
	1	1484298	AtoG	+	NA19223,HG00259,HG00234,NA12058,NA19209,NA19130,NA20513,NA20509,NA19095,HG00355,HG02215,NA19256	12	1	0	1
	1	1484310	AtoG	+	HG00127,HG00259,NA20527,NA19131,HG00328,NA12272,HG00117,HG02215,NA19198,NA12751,NA06986,NA20508,HG00237,HG00097,NA20532,NA19095,NA19159,HG00236,NA19256,NA20795,NA20519,NA19223,NA19209,NA12842,HG00126,NA18511,HG00234,NA12873,NA12058,HG00355,NA20541,NA20513,HG00119,HG00244,HG00183,HG00321,NA19141,NA12399,NA19118,HG00141,NA18934,HG00378,NA12156,NA19236,NA19222	45	1	1	1
	1	1484320	AtoG	+	HG00355,HG00234,NA19159,NA12751,NA20795,NA19141,HG00182,NA20513,NA20527,HG00328,NA20765,HG00117,NA12272,NA12399,NA19236,HG02215,HG00259,NA20541,HG00378,NA19222,NA19209,HG00101,NA20532,NA19256,HG00236,NA19095,HG00244,NA12156,NA19223,NA06986,HG00237,NA20508,NA19130,NA18511,NA19118,NA19131,NA12058,NA12842,HG00143,NA18934,NA19248,NA20509,HG00127,NA12873	44	1	1	1
	1	1484322	AtoG	+	NA19095,NA12156,NA19118,HG00101,NA20541,NA20765,NA20513,HG00355,NA20795,NA20509,NA20527,HG00237,HG00236,NA19131,NA12058,NA12751,NA06986	17	1	0	1
	1	1484347	AtoG	+	HG00244,NA19131,NA06986	3	1	0	1
	1	1484363	AtoG	+	HG00355,NA20513,NA20509,NA18498,HG00117,HG00127,NA12872,HG00378,NA19130,NA12751,NA12399,NA19095,NA20527,HG00097,HG00237,HG01334,NA20531,HG00131,NA06986,HG00182,NA19248,NA19223,NA19131,NA19213,HG00259	25	1	1	1
	1	1484366	AtoG	+	NA06986,HG00244,NA12751,HG00131,HG00378,NA18498,NA19130,HG00234,NA19198,NA20532,NA20509,NA20513,HG00097,HG00355,HG00259,HG00101,NA19131,HG00309,NA19095,NA19223,NA20795,NA20527,NA19141	23	1	1	1
	1	1484388	AtoG	+	HG00361,HG00378,NA20513,NA18498,NA12272,HG00259,HG00355,HG00131,NA20588,NA12751,HG00234,NA06986,HG00117,NA20532,HG00309,HG00244,NA19198,NA19223,NA19095,NA20527,NA19159,NA20795,NA18511	23	1	1	1
	1	1484393	AtoG	+	NA12399,NA20795,HG00097,HG00244,HG00259,NA19159,NA19107,NA19223,NA20532,NA12751,NA19198,HG00309,NA20527,HG00355,NA18511,NA18498,HG00234,NA06986,NA20765,HG00131,NA19095,HG00361	22	1	1	1
	1	1484395	AtoG	+	HG00378,NA20513	2	1	0	1
	1	1484443	AtoG	+	NA12283,HG00355,NA06986,NA20527,HG00365,HG00111	6	1	0	1
	1	1484455	AtoG	+	HG00376,NA19159,HG00325,NA06986,HG00117,NA20812,NA19256,HG00150,HG00133,HG00355,NA06994,NA12156,NA12399,HG00111,NA20527,NA19095,NA20508,NA19131,HG00183,HG00259,NA18934,NA20513,HG00234,NA12272,HG00309,NA18511	26	1	1	1
	1	1484508	AtoG	+	NA11843,NA19159,NA06986,HG00321,HG00244,HG00141,NA19095,HG00111,HG00309,NA12283,NA12058,HG00285,NA19248,HG00328,NA19131,HG00183,NA19213,NA18498,NA20754,NA12763,NA19200,HG00338,NA12272,HG00259,NA19146,NA18934,HG00355,HG00234,HG00117,NA20513,HG00150,HG00127,HG00142,NA19130,NA12761,NA19118,NA12399	37	1	1	1
	1	1484511	AtoG	+	HG00355,HG00234,NA12006,NA19095,NA12761,HG00338	6	1	0	1
	1	1484518	AtoG	+	HG00321,NA06986,NA19116,NA12283,HG00355,NA19131,NA12272,NA12399,HG00338	9	1	0	1
	1	1484568	AtoG	+	HG00355,HG00131,HG00117	3	1	1	1
	1	1486574	AtoG	+	NA18505,NA18907,NA19152	3	0	0	0
	1	1486611	AtoG	+	NA18499,NA18505,NA18907,NA19098,NA19175	5	0	0	0
	1	1487887	AtoG	+	HG00262,NA12717,NA18486,NA18870,NA19225,NA19236,NA19247	7	0	0	0
	1	1512287	AtoG	+	HG00127,HG00188,HG00261,HG00375,NA11893,NA12776,NA18867,NA19185,NA19256,NA20769	10	0	0	0
	1	1520825	AtoG	+	NA20527,HG00117	2	1	1	1
	1	1520897	AtoG	+	HG00355,HG00117,NA20527	3	1	1	1
	1	1520898	AtoG	+	NA20527,HG00355,HG00117	3	1	1	1
	1	1520923	AtoG	+	NA20527,HG00117,HG00355	3	1	1	1
	1	1521756	AtoG	+	NA20527,HG00117	2	1	1	1
	1	1521799	AtoG	+	HG00117,NA20527	2	1	1	1
	1	1521800	AtoG	+	HG00117,HG00355,NA20527,NA19095	4	1	1	1
	1	1521825	AtoG	+	NA20527,HG00117	2	1	0	1
	1	1521912	AtoG	+	NA20527,NA19095,HG00117	3	1	1	1
	1	1521929	AtoG	+	NA20527,NA19095	2	1	1	1
	1	1521990	AtoG	+	HG00117,NA20527	2	1	1	1
	1	1521991	AtoG	+	NA19095,NA20527,HG00117	3	1	1	1
	1	1522139	AtoG	+	NA19095,NA20765,NA20527,HG00117	4	1	1	1
	1	1522140	AtoG	+	NA19159,NA20527,HG00117,NA19095,HG00355,NA20765	6	1	1	1
	1	1522142	AtoG	+	NA20765,NA19095	2	1	1	1
	1	1522165	AtoG	+	NA19095,HG00117,NA20765	3	1	1	1
	1	1522221	AtoG	+	HG00117,NA19095,NA06986,NA20527,HG00355	5	1	1	1
	1	1522224	AtoG	+	NA06986,NA19095,HG00117,NA20527	4	1	0	1
	1	1522241	AtoG	+	NA20527,NA06986,NA20765,HG00117,NA19095	5	1	1	1
	1	1563339	AtoG	-	NA18508,NA06994,NA19171,NA19114,NA18912,NA12778	6	1	1	1
	1	1563367	AtoG	-	HG00319,HG00276,NA18508,NA12778	4	1	0	1
	1	1563385	AtoG	-	NA19114,NA06994,HG00276,NA20534	4	1	0	1
	1	1563433	AtoG	-	NA19171,NA18912,NA19114,NA19093	4	1	0	1
	1	1563455	AtoG	-	NA20534,NA06994,NA19171,NA20790,NA20513,NA18923,NA19093,NA06985,NA18508,NA18912,NA12778	11	1	1	1
	1	1563480	AtoG	-	NA18912,NA06985,NA19093	3	1	0	1
	1	1563505	AtoG	-	NA20513,NA20534,NA19093,HG00338,NA06985,NA19131	6	1	0	1
	1	1563595	AtoG	-	HG00338,NA19131	2	0	0	0
	1	1663506	AtoG	-	HG00115,HG00110,NA12275,NA12718	4	1	0	1
	1	1663523	AtoG	-	HG00099,HG00271,NA11843,HG00097,HG00141,HG00356,HG00262,NA19200,HG00364,HG00139,HG00137,HG00261,HG00264,HG00342,HG02215,NA20508,HG00384,NA12718,NA20810,NA20525,HG00273,NA20509,HG00306,NA20792,HG00338,NA11830,HG00266,NA19222,HG00186,NA20787,NA11832,HG01334,NA20543,NA20507,NA11840,NA20796,NA20812,NA10847,NA12761,NA20528,HG00145,NA12872,NA07357,NA20785,HG00380,HG00259,NA12889,HG00383,HG00176,HG00236…	140	1	0	1
	1	1663536	AtoG	-	HG00379,HG00235,NA12718,NA12749,NA20586,HG00097,NA20790,NA07048,NA12413,NA20800,NA19149,HG00242,HG00345,HG00351,NA20520,NA20517,HG00141,HG00139,NA12813,NA20528,HG00324,NA18861,HG00186,HG00125,NA19175,NA12762,HG00258,NA20541,NA20798,HG00330	30	1	0	1
	1	1663538	AtoG	-	NA12717,HG00331,HG00328,HG00379,HG00383,HG00120,NA11995,HG00160,HG00127,HG00143,HG00380,NA12006,NA12546,NA20531,NA19093,HG00126,HG00145,NA20524,NA20588,NA11830,HG00266,HG00176,HG00343,NA20581,HG00258,NA12044,HG00324,NA12830,NA12829,NA20809,HG00111,HG00346,NA12004,HG00308,NA12413,NA20586,HG00232,NA12400,NA20806,NA11930,HG00260,HG00369,NA12890,NA20828,NA20769,NA18933,HG00341,HG00171,NA12750,NA20508…	310	1	1	1
	1	1663539	AtoG	-	NA12873,HG00379,NA20530,NA20513,NA12045,NA06989,HG00321,NA06985,NA18489,HG00378,NA20514,HG00106,HG00255,HG00351,NA12827,NA20792,HG00149,HG00350,NA20761,NA20778,HG00137,HG00189,HG00122,NA20797,NA20785,NA19197,NA12286,HG00269,HG00246,NA20800,NA20538,NA20504,HG00319,NA10847,HG01790,NA20819,HG00380,HG00346,HG00272,NA19141,NA20512,NA20586,HG00240,NA12399,NA12400,HG00369,HG00366,HG00330,NA20806,NA18908…	76	1	0	1
	1	1663543	AtoG	-	HG00331,NA12155,NA07051,NA20581,NA12287,HG00364,HG00346,NA20503,NA19129,HG00159,HG00306,NA19236,HG00262,HG00115,NA20505,NA10851,NA11840,NA12814,HG00143	19	1	0	1
	1	1663547	AtoG	-	HG00110,NA18870,NA18917,NA19201	4	1	0	1
	1	1663560	AtoG	-	NA20819,HG00242,HG00250,NA20760,HG00325,NA11831,NA12889,HG00234,HG00384,HG00326,NA20509,NA18907,HG00338,HG00308,NA07037,HG00266,NA20510,NA12812,NA20535,HG00280,HG00269,NA20512,HG00108,HG00331,NA20756,HG00154,NA20792,NA20759,HG00330,NA20536,NA20800,HG00334,NA12348,NA19102,NA19113,NA20517,NA12287,HG00158,HG00182,HG00319,HG00351,NA20519,NA20518,HG00106,NA19236,HG00313,HG00372,NA18868,HG00349,NA18489…	92	1	0	1
	1	1663567	AtoG	-	HG00335,NA12234,NA19129,HG00125,NA06984,NA19117,NA18489,HG00251,NA20516,HG00321,HG00158,NA20828,HG00273,NA12827,NA20799,HG00349,HG00100,NA06985,NA06989,NA19201,NA20513,HG00330,NA19130,NA18868,HG00336,HG00378,HG00256,HG00339,NA20530,HG00338,HG00328,NA12873,HG00148,HG00242,HG00379,NA12156,NA19209,NA20760,HG00306,NA20521,NA20536,HG00346,NA20752,NA12413,NA20759,HG00183,NA20514,NA20809,NA12829,HG00324…	309	1	1	1
	1	1663568	AtoG	-	HG00139,HG00157,HG00376,NA19114,NA18916,NA20773,HG00109,NA19175,HG00174,HG00264,NA18917,HG00263,HG01334,NA20811,NA20507,NA11840,HG00099,NA11843,NA11892,HG00189,NA11893,NA20803,NA20756,NA12286,NA20518,NA12340,HG00155,NA20538,NA20521,NA19117,HG00158,NA20516,HG00121,NA12234,HG00183,HG00334,HG00313,NA20519,HG00339,HG00250,HG00243,HG00233,NA19116,NA12341,HG00308,HG00332,NA20525,HG00097,HG00369,HG00326…	187	1	0	1
	1	1663582	AtoG	-	HG00346,HG00315,NA12044,NA20524,NA18870,NA12716,HG00356,NA20806,HG02215,NA20543,HG00119,NA20527,NA07037,HG00120,NA12762,HG00160,NA12717,NA12761,HG00278,NA20810,HG00384,HG00099,NA20761,NA11881,NA11892,NA12154,HG00255,HG00125,HG00335,HG00262,HG00321,NA20513,NA20771,HG00338,HG00379,HG00261,HG00174,HG00115,NA12760,HG00319,NA07051,NA20787,HG00100,HG00332,HG00240,NA12750,HG00328,NA12400,HG00306,HG00180…	144	1	0	1
	1	1663586	AtoG	-	NA19200,NA19093,NA20510,NA20524,NA12889,HG00143,HG00159,HG00345,HG00128,HG00342,HG00343,HG00360,HG00148,NA19129,HG00125,NA20521,NA18861,HG00138,HG00344,NA19113,HG00325,HG00137,NA20517,NA19114,HG00122,HG00356,NA20518,HG00150,NA19116,HG00123,HG00179,HG00126,HG00145,HG00119,NA20512,NA19141,HG00324,NA12155,NA12156,HG00378,HG00320,HG00251,NA20760,HG00334,NA12234,NA20536,NA20759,NA12249,HG00250,HG00376…	297	1	0	1
	1	1663592	AtoG	-	NA20528,HG00109,NA19172,HG01334,HG00139,HG00182,HG00127,NA11831,NA12872,NA20508,HG00110,HG00261,NA12775,HG00341,NA20771,HG00188,NA20797,NA11893,NA11892,NA20819,NA20761,NA07347,HG00282,NA12272,NA20796,HG00366,HG00128,HG00280,NA10851,HG00189,NA12005,NA20510,HG00258,NA12004,HG00143,NA20774,HG00383,HG00345,HG00361,HG00262,HG00141,NA11843,HG00099,HG00275,NA11840,NA12873,NA19222,NA20507,NA20811,NA20792…	213	1	0	1
	1	1663595	AtoG	-	NA18499,HG00119,HG00332,NA20525,NA12718,HG00233,NA11918,HG00378,HG00344,HG00366,NA12273,NA11881,NA20504,NA07048,NA20809,NA12400,NA20588,HG00324,NA19209,NA11830,NA12341	21	1	0	1
	1	1663608	AtoG	-	NA20588,HG00136,NA20581,HG00174,NA18917,NA12750,HG00171,NA20806,HG00369,HG02215,NA20525,HG00332,HG00120,HG00159,NA12546,HG00177,NA18489,NA12873,NA12889,HG00364,NA12813,NA18499,HG00189,NA12776,HG00269,NA07051,HG00121,NA20521,NA12400,NA12413,HG00342,HG00255,NA20514,HG00350,NA20517,NA20504,NA12275,NA12282,HG00137,HG00339,NA18907,HG00366,NA06984,HG00331,NA18870,NA12762,HG00236,NA19093,HG00148,HG00335…	63	1	0	1
	1	1663609	AtoG	-	NA12762,HG00234,HG00125,HG00321,NA18489,HG00266,HG00342,HG00327,NA12273,HG00138,NA12872,HG00345,NA12413,NA12282,HG00326,NA11918,HG00375,NA07048,NA11831,NA11843,HG00380,HG00177,NA20514,NA12006,HG00101,NA18870,HG01790,NA12873,HG00273,NA20507,HG00179,HG00106,NA20543,NA12842,HG00275,HG00126,NA19209,NA11840,HG00149,NA20504,HG00271,HG00383,NA12546,NA20524,NA12275,NA19093,NA07056,HG00246,NA20538,NA20769…	311	1	0	1
	1	1663635	AtoG	-	NA20806,NA20787,HG00119,HG00321,NA19114,HG00315,NA19200,HG00126,NA20785,NA12717,HG00332,NA06989,HG00335,NA12750,NA12890,HG00376,NA20514,HG00118,HG00369,NA12005,HG00177,HG00313,HG00188,HG00186,NA19197,HG00272,HG00380,HG00334,HG00109,NA11843,HG00097,NA20790,NA20518,HG00382,NA20798,NA20589,HG00306,NA20792,HG00308,NA18499,HG00253,NA12829,NA18907,NA19201,NA19129,HG00365,NA20539,HG00120,NA18933,NA20535…	261	1	1	1
	1	1663638	AtoG	-	HG00324,HG00180,NA12776,HG00115,HG00275,NA18868,HG00240,HG00356,HG00328,NA20811,NA12813,HG00188,HG00369,NA18933,HG00118,NA20771,NA12750,NA20819,NA11893,NA06994,NA12812,NA20538,NA20769,NA19093,HG00235,NA12873,NA20507,NA19209,NA20524,HG00110,NA12716,NA19222,NA11840,NA07037,HG00371,HG00311,NA12814,NA06984,NA20589,HG00372,NA11930,HG00106,NA12749,NA20770,HG00099,NA19175,HG00237,HG00097,NA20792,NA20503…	169	1	0	1
	1	1663639	AtoG	-	NA12776,NA20787,NA06984,NA12399,NA20785,HG00118,NA12778,NA12775,NA12156,HG00177,NA20796,HG00319,HG00369,HG00313,HG00272,NA20535,HG00331,NA18933,NA20516,HG00130,HG00255,HG00123,NA12234,HG00145,HG00379,HG00231,HG00097,NA20790,NA19172,HG00308,HG00275,HG00366,NA20773,NA12400,NA18861,HG00345,HG00127,HG00122,NA06985,HG00137,HG00330,NA20800,HG00364,HG00311,NA12287,NA18489,NA12282,NA20798,HG00158,NA07048…	122	0	0	1
	1	1663640	AtoG	-	HG00326,HG00343,HG00361,HG00149,NA10851,HG00258,HG01791,HG00260,HG00245,NA19197,NA18499,NA12282,NA18933,NA20792,NA20509,NA20819,NA12275,HG00115	18	1	1	1
	1	1663698	AtoG	-	HG00233,HG00269,HG00154,HG00327,NA12750	5	1	0	1
	1	1663741	AtoG	-	HG00236,HG00269,HG00327,HG00115,HG00233,NA20772,NA12750	7	1	0	1
	1	1664023	AtoG	-	HG00315,NA19095,NA12842,NA18868	4	1	0	1
	1	1664059	AtoG	-	HG00331,NA12005,NA20787	3	1	0	1
	1	1664061	AtoG	-	NA19143,NA11831,NA07056,NA12006,NA12275,NA20538,NA20769,HG01334,HG00235,NA11992,NA19213,NA18870,HG00326,HG00138,NA19247,NA18873,HG00154,NA19131,HG00365,HG00364,HG00343,HG00105,NA12872,HG00327,NA19189,NA12762,HG00344,NA19113,HG00257,NA07037,HG00129,NA20801,HG00239,NA12287,NA20588,HG00345,NA19248,HG00269,HG00342,HG00246,HG00349,NA19214,NA12889,NA12004,NA11840,NA19102,HG00159,NA20517,NA19190,NA20542…	168	1	0	1
	1	1664075	AtoG	-	HG00369,HG00188,NA07056,NA12275,NA20769,HG00154,HG00332,HG00268,HG00261,HG00233,HG00306,NA20800,NA20768,NA20532,HG00158,NA12383,HG00284,HG00105,HG00131,NA11830,HG00373,HG00178,NA11881,NA11840,NA20792,NA20761,NA12762,NA18510,NA06989,HG00257,HG00380,HG00343,NA11918,HG00177,NA19137,HG00236,HG00346,NA20536,HG00339,HG00272,NA19117,HG00185,HG00122	43	1	0	1
	1	1664083	AtoG	-	NA20756,NA20795,HG00158,NA20504,HG00176,NA20540,HG00313,HG00334,NA12156,NA19204,NA20515,HG00280,NA11881,NA12154,NA19256,NA19117,NA20525,HG00378,HG00350,HG00262,HG00118,HG00174,HG02215,NA20808,NA20787,HG00157,NA20783,HG00384,HG00332,HG00344,HG00238,NA20801,NA12872,NA20539,NA11832,HG00276,HG00349,HG00131,HG00257,HG00311,NA12413,NA18858,HG00327,NA19175,HG00100,NA20798,NA12045,NA11992	48	1	0	1
	1	1664088	AtoG	-	HG00384,NA20770,HG00187,NA07037,NA20517,HG00233,HG00373,NA12749,HG00276,NA20754,HG00344,NA12718,HG00183,HG00266,NA12815,NA20535,NA20759,NA20504,NA20769,HG00236,HG00188,HG00246,NA12489,NA11931,NA12282,NA18499,NA20514,NA20773,NA20756,NA18510	30	1	0	1
	1	1664100	AtoG	-	NA12829,NA20535,HG00250,HG00143,NA12249,HG00246,NA07056,NA12275,NA20531,NA12234,NA19114,NA20808,NA20530,HG00258,HG00123,NA10851,NA18858,NA12004,NA20517,NA12399,NA19113,NA20510,HG00282,NA11995,NA20758,NA20504,NA12827,NA18488,NA12273,HG00266,HG00313,HG00326,HG00275,HG00325,NA12815,HG01334,HG00383,NA19108,NA20800,HG00339,NA20536,HG00149,NA20518,HG00351,HG00251,NA19143,NA19198,HG00345,NA20757,NA20528…	307	1	0	1
	1	1664101	AtoG	-	NA20528,NA18933,NA12749,HG00237,NA20806,HG00369,NA18923,NA12750,NA18917,NA20582,HG00174,NA18916,NA12760,HG00176,HG00331,NA12761,NA18488,NA12827,NA20530,NA18873,NA18870,HG00366,NA18868,HG00180,NA18861,HG00306,NA18858,NA20542,NA12775,NA20541,HG00182,NA12776,NA20801,NA18934,NA12717,NA12718,HG00097,NA20525,HG00110,HG00234,NA18510,NA18508,NA12778,NA20540,HG00358,HG00118,HG00365,NA20539,NA20538,NA18499…	307	1	0	1
	1	1664114	AtoG	-	NA12413,HG00281	2	1	0	1
	1	1664121	AtoG	-	NA20518,HG00101,HG00256,NA12287,NA20811,HG00155,NA19102,HG00258,NA12272,NA12873,NA07347,NA19113,HG00126,NA20534,HG00282,HG00380,NA12273,NA11832,NA19108,HG00361,NA12006,HG00123,NA12275,NA20527,HG00182,NA20515,NA11893,NA20541,NA10847,NA19206,HG01334,HG00325,HG00137,HG00245,NA20785,HG00362,HG00122,NA19236,NA12842,NA19129,NA20756,NA20510,NA20828,NA12889,HG00143,NA20800,NA18489,HG00268,HG00158,NA20530…	184	1	0	1
	1	1664126	AtoG	-	NA20811,NA20758,HG00245,NA19197,NA18933,NA20517,HG00105,NA20756,HG00237,HG00136,NA20806,HG00143,HG00137,HG00258,NA20510,HG00379,NA19149,NA07037,NA18916,NA07051,HG00266,NA20801,HG00260,NA19107,NA19198,NA19206,HG00121,NA19184,NA20785,NA07048,HG00331,NA19108,NA19200,HG00384,HG00342,HG00242,NA20761,HG00326,NA20543,NA19113,NA18502,HG00364,NA19172,HG00118,HG00264,HG00358,NA10847,NA20536,NA20534,HG00235…	81	1	0	1
	1	1664136	AtoG	-	NA20505,NA20799,NA20819,HG00109,NA18933,NA19223,NA20525,HG00188,NA07347,NA18502,NA07056,HG00361,NA11831,HG00384,NA20514,NA19141,NA19200,NA20518,HG00233,NA11995,HG00259,HG00321,NA19117,NA11881,HG00338,NA12399,NA20530,HG00309,NA19131,NA19149,NA12750,NA19175,HG00182	33	1	0	1
	1	1664145	AtoG	-	NA20819,NA12718,NA19160,NA06994,HG00309,HG00375,NA19095,NA19198	8	1	0	1
	1	1664147	AtoG	-	NA12777,NA19201,NA20513,NA19172,NA07357,NA19200,NA18934,NA12716,HG00338,NA20504,NA19093,NA12399,HG00383,NA19095,NA07048,HG00259,NA07347,HG00375,NA19198,NA20518,NA12842,NA20799,NA19236,NA20819,NA19108,HG00126,NA19131,NA19209,NA18868,NA19152,NA18908,NA18910,NA11893,NA20527,NA19175	35	1	1	1
	1	1704126	AtoG	-	NA18907,NA19198,NA19200,NA19257	4	0	0	0
	1	1707486	AtoG	-	HG00139,NA18907,NA19095,NA19222,NA19225	5	0	0	0
	1	1707555	AtoG	-	HG00139,HG00366,NA18489,NA18498,NA18502,NA18511,NA18517,NA18858,NA18873,NA18909,NA18912,NA18916,NA18934,NA19093,NA19095,NA19096,NA19099,NA19107,NA19108,NA19114,NA19117,NA19121,NA19129,NA19130,NA19131,NA19138,NA19141,NA19143,NA19147,NA19152,NA19159,NA19160,NA19171,NA19189,NA19190,NA19197,NA19198,NA19204,NA19206,NA19209,NA19213,NA19214,NA19222,NA19223,NA19225,NA19248,NA19256,NA19257,NA20815	49	0	0	0
	1	1729411	AtoG	-	NA20527,NA20524,NA12814,NA12275,HG00369,NA06985,NA12413	7	1	1	1
	1	1729416	AtoG	-	HG00245,NA12340,NA12413,NA11830,NA12058,HG00142,NA20524,NA20771,HG00131,HG00285,HG00100,NA20527,HG00177,NA12275,NA20765,NA12045,HG00130,NA19095,HG00325,NA11930,NA12814,NA12874	22	1	1	1
	1	1729419	AtoG	-	NA12348,NA20517,HG00256,HG00133,NA12814,HG00146	6	1	0	1
	1	1729433	AtoG	-	NA11829,NA20512,HG00325,NA12043,NA20761,NA11832,HG00157,HG00106,NA20802,NA12413,NA20766,HG00237,NA20797,HG00245,HG00360,HG00267,NA20519,NA12814,HG00285,HG00100,NA11840,HG00131,NA12045,HG00332,HG00160,NA12843,HG00154,HG00146,NA12347,NA12283,HG00246,HG00141,NA20524,HG00133,HG00331,HG00121,HG00234,NA20760,NA12874,HG00112,HG00369,NA12751,HG00346	43	1	0	1
	1	1729446	AtoG	-	HG00145,HG00105,HG00256,HG00234,HG00142,HG00263,NA20761,NA20524	8	1	0	1
	1	1729448	AtoG	-	HG00313,NA20802,NA20519,HG00246,NA06994,NA20773,HG00096,NA12762,NA20589,NA12154,NA12873,NA20783,HG00323,NA12340,HG00274,NA11831,NA12546,NA20800,HG00105,NA20815,NA11930,HG00244,NA19116,HG00285,HG00187,HG00331,NA12058,NA12283,NA20770,NA12272,NA20758,HG00106,NA12045,HG00120,NA12775,NA12763,HG00139,HG00102,HG00177,NA20809,HG01789,HG00145,NA12275,HG00268,NA20759,NA11881,HG00132,NA20524,NA20768,NA12004…	125	1	1	1
	1	1729449	AtoG	-	HG01789,NA20519,NA12045,HG00157,HG00268,HG00145,HG00187,HG00101,NA12775,NA12873,HG00132,HG00138,NA06986,HG00119,NA12004,NA20524,NA12340,HG00260,NA11831,HG00360,NA20800,HG00244,HG00105,HG00325,HG00356,NA12751,NA20790,HG00160,HG00234,HG00141,HG00102,NA12272,HG00131,HG00106,NA12058,HG00120,HG00154,HG00129,NA12347,HG00117,HG00238,NA20527,NA20771,NA20589,HG00361,NA11830,HG00130,HG00331,NA12283,NA11829…	57	1	1	1
	1	1729453	AtoG	-	NA12275,NA20797,NA12814,NA07056,HG00131,HG00102,NA11832,NA20790,NA12843,HG00331,HG00142,HG00133,HG00325,HG00245,HG00332,NA11829,NA12348,HG00244,HG00146,NA20524,HG00256,NA12283,NA12340,NA10847	24	1	0	1
	1	1729470	AtoG	-	NA20809,HG00369,HG00100	3	0	0	1
	1	1729472	AtoG	-	NA12889,HG00145,HG01791,NA11832,NA12812	5	0	1	0
	1	1729477	AtoG	-	HG00141,NA20771,HG00257,NA10847,NA12413,NA12751,NA11840,HG00157,HG00138,HG00344,NA19159,NA06986,HG00154,NA20813,NA12814,HG00263,HG00146,NA20581,HG00355,HG00361,NA12272,HG00110,HG00102,HG00131,NA20800,HG00123,NA12283,NA12004,NA20783,NA06994,NA12873,HG00268,HG00149,NA20808,NA20804,NA20790,HG00369,HG00139,NA11881,HG00132,NA11832,HG00177,NA12154,HG00346,NA06989,NA20516,HG00237,NA11830,HG00142,NA11831…	151	1	1	1
	1	1729478	AtoG	-	NA20519,NA11930,NA12154,NA19130,HG00246,HG00367,HG00260,HG00256,NA20766,HG00118,HG00265,NA12347,HG00355,NA12889,NA11994,HG00257,HG00244,NA12812,HG00311,NA10847,NA19095,NA11832,NA12272,HG00131,HG00110,NA20771,HG00187,NA07347,HG00245,NA19159,NA12045,NA18511,NA19141,HG00309,HG00141,NA12873,NA06994,HG00234,NA20765,HG00105,NA11829,NA20772,HG00268,HG00332,NA20759,HG01789,HG00138,NA06986,NA18934,NA19108…	66	1	1	1
	1	1729492	AtoG	-	NA12154,HG00256	2	1	0	1
	1	1729502	AtoG	-	HG00360,HG00131,HG00137	3	1	0	1
	1	1729505	AtoG	-	NA11831,HG00267,HG00268,HG00129,NA06985,NA12814,HG00236,NA06986,HG00355,NA12812,NA20808,HG00257,NA12058,NA20516,NA20828,NA12874,HG00179,HG00234,HG00138,NA12144,HG00309,HG00117,HG00131,HG00120,HG00244,NA06989,HG00105,HG00331,NA20532,NA12763,NA20527,HG00132,HG00137,NA11930,HG00245,NA11830,NA12843,NA19141,NA19095,NA12348,HG00313,HG00142	42	1	1	1
	1	1729509	AtoG	-	NA20828,HG00246,HG00117,NA12058,HG00355,HG00341,NA12546,NA20527,HG00132,NA20532,NA11832,HG00139,HG00236,NA11830,NA20813,NA06985,HG00138,NA19095,NA11831	19	1	0	1
	1	1729513	AtoG	-	NA12340,HG00137,NA12762,HG00250,HG00234,NA10847,HG00244,HG00129,NA20790,NA12812,NA12283,NA11832,NA12272	13	1	0	1
	1	1729518	AtoG	-	HG00157,NA06986,NA19159,HG00263,NA12814,NA12874,NA20758,NA12347,HG00101,NA12272,HG00245,HG00309,NA20532,NA11832,HG00137,NA19141,HG00234,HG00325,NA20540,HG00121,HG00119,NA12812,NA06985,NA12045,NA20760,HG00141,NA20808,HG00341,NA10847,NA20771,NA12413,NA11840,HG00120,HG00149,NA20524,NA12340,NA11930,NA12843,NA12763,NA20805,NA11881,HG00096,NA20531,NA20802,HG00355,HG00232,NA18486,HG00246,HG00179,HG00267…	139	1	1	1
	1	1729519	AtoG	-	HG00251,HG00360,NA20813,NA20797,NA20540,HG00179,NA07051,HG00234,HG00142,HG00236,HG00133,NA12843,NA20512,NA20513,HG01791,HG00129,NA20803,NA20531,NA20761,HG00149,HG00100,NA20539,HG00268,HG00325,HG00118,NA11831,HG00112,NA20772,NA20760,HG00158,NA20808,NA12004,HG00244,HG00246,NA12283,HG00265,HG00105,HG00117,HG00356,HG00323,NA12383,HG00331,NA20773,HG01789,NA20766,NA12058,HG00101,NA18511,HG00120,HG00245…	123	1	1	1
	1	1729534	AtoG	-	NA12812,NA20802,NA12043	3	1	0	1
	1	1729549	AtoG	-	NA20797,NA12874	2	1	0	1
	1	1729550	AtoG	-	NA12814,HG00137,HG00105,HG00133,NA12751	5	1	0	1
	1	1729551	AtoG	-	NA20527,HG00146	2	1	1	1
	1	1729557	AtoG	-	NA12814,HG00137	2	1	0	1
	1	1729584	AtoG	-	HG00112,HG00146,HG00105,HG00325,NA12272,HG00142,HG00245,NA20527,NA12814,NA12874,HG00285,NA18486	12	1	1	1
	1	1729585	AtoG	-	HG00325,HG00285	2	1	1	1
	1	1729597	AtoG	-	NA11893,HG00234,NA12275,HG00263,NA12814,NA12874,NA20828,HG00131,NA20527,HG00142,NA12155,HG00137,HG00141,HG01791,NA12843,HG00346,HG00244,HG00109,NA20790,HG00232,HG00106,NA12004,NA20517,HG00246	24	1	0	1
	1	1729599	AtoG	-	HG00137,HG00361,NA20527,NA20534,NA12763,NA12272,NA20528,HG00260,NA20772,NA18486,HG00246,HG00328,HG00105,HG00142	14	1	0	1
	1	1729608	AtoG	-	HG00263,NA12814,HG00131,HG00110,HG00361,NA12058,HG00146,HG00138,HG00259,HG01791,NA20790,NA20808,NA12043,HG00260,NA20773,HG00187,HG00346,HG00142,HG00118,NA11831,NA20512,NA20519,NA20768,NA20527,HG00127,NA12763,NA12546,NA18486,NA12275,HG00132,NA12340,NA19107,NA11830,HG00106,NA11829,NA18870,NA10847,HG00369,HG00130,NA20765,NA12413,HG00313	42	1	1	1
	1	1729613	AtoG	-	HG00236,HG00183,NA20532,HG00110,HG00137,NA12058,HG00109,HG00251,HG00256,NA12815,NA12282,NA20509,HG00260,NA06986,NA19121,HG00100,HG00313,HG00255,NA18486,HG00246,NA11840,HG00106,NA11893,NA20528,HG00309,NA11930,NA20527,NA19131,NA12761,NA19141,HG00120	31	1	0	1
	1	1729614	AtoG	-	NA06986,HG01789,HG00138,NA11840,HG00127,NA20828,NA20790,NA10847,HG00109,NA19121,HG00285,NA20527,HG00268,NA20509,NA20532,HG00332,HG00255,HG00183,NA11830,NA12874,HG00274,NA12761,HG00139,NA12814,HG00118,NA12347,NA20758,HG00232,NA18934,NA20540,NA12275,NA19098,NA12156,NA20783,HG00313,NA12546,HG00117,NA19141,NA12155,NA18870,HG00328,HG00265,NA12873,NA19131,NA12763,NA12272,NA20808,HG00100,NA19107,HG00106…	58	1	1	1
	1	1729616	AtoG	-	HG00257,HG00232,HG00255,NA20790,NA12058	5	1	0	1
	1	1729646	AtoG	-	HG00127,HG00154,NA12751,HG00369,NA20800,NA20760,NA12283,HG00129,NA20531,NA20813,NA20771,HG00158,NA20803,NA20524,NA12762,NA12546,NA12275,NA20802,NA20768,HG00097,NA18912,NA11840,HG00243,HG01789,NA12413,HG00157,HG00250,HG00344,NA12814,HG00360,HG00332,NA20790,HG00371,NA12843,HG00236,HG00146,NA20797,NA12761,HG00118,NA20761,NA11881,HG00273,NA07056	43	1	0	1
	1	1729651	AtoG	-	HG00325,HG00143,NA20770,HG00261,NA20758,HG00263,HG01789,NA11893,NA11840,NA06986,NA07347,NA12144,NA12004,HG00285,NA11829,HG00132,HG00139,NA19189,NA12154,NA20813,HG00138,NA19130,HG00268,NA11831,HG00346,NA20796,NA20803,NA12843,NA20519,HG00232,HG00096,NA11881,HG00127,HG00355,NA12830,HG00260,NA19098,NA12889,NA12272,HG00101,NA20819,HG00309,NA11832,HG00267,NA19141,HG00131,NA20532,HG00110,HG00137,NA12874…	202	1	1	1
	1	1729652	AtoG	-	HG00265,NA20543,NA20766,HG00262,NA12890,NA20807,HG00142,NA18923,NA12889,NA20805,NA12717,NA20768,NA12144,NA19175,HG00250,HG00243,HG00129,NA20517,HG00257,NA12272	20	1	0	1
	1	1729660	AtoG	-	NA11930,HG00371,NA19121,NA19171,NA19131,HG00285,NA19223,NA20543,NA12762,NA20809,NA20815,HG00132,NA18868,HG00139,NA20530,NA20798,HG00259,NA20513,HG00183,NA20771,NA18916,NA20805,NA06986,NA11840,NA19146,NA11893,NA11831,NA20544,HG00346,NA12717,HG00236,NA06994,NA20766,NA12761,HG00146,NA19256,HG00118,HG00102,NA20528,HG00182,NA20790,NA18511,NA11994,HG00369,NA20804,NA12751,NA20828,NA20581,HG00356,NA12716…	210	1	1	1
	1	1729665	AtoG	-	HG00246,NA20524,NA12004,HG00285,HG00256,NA20787,NA12286,NA11829,NA20527,HG00120,HG00133,NA18916,HG01791,NA07051,NA20800,HG00346,HG00109,NA12155,NA19107,HG00106,HG00141,NA10847,NA20771,HG00321,HG00185,NA18486,NA11840,NA20774,HG00129,NA20531,NA11893,NA20758,NA20797,NA20512,HG00371,HG00369,HG00243,NA18923,NA20765,NA12347,HG00160,NA18934,HG00102,NA12751,NA19256,NA19175,NA20581,NA12340,NA20808,NA12348…	138	1	1	1
	1	1729969	AtoG	-	NA12154,HG00267	2	1	0	1
	1	1729971	AtoG	-	NA11829,HG00325,HG00285,NA12144,NA12004,NA19131,NA12763,HG00311,NA11930,HG00371,NA20514,NA20802,NA12155,HG00328,NA20768,HG00106,NA20581,NA06989,HG00274,NA19159,NA20803,HG00263,HG00130,NA19116,NA20796,NA20527,NA20758,HG00120,HG00138,NA20530,HG00356,HG00132,NA20815,NA20809,NA11931,NA12275,HG00139,HG00259,NA18498,HG00323,NA20588,HG00179,NA20813,HG00119,HG00145,NA12890,NA18486,NA20772,HG00185,HG00245…	144	1	1	1
	1	1729974	AtoG	-	HG00139,HG00137,NA10847,HG00260	4	0	0	0
	1	1729975	AtoG	-	NA12275,NA20771	2	0	0	0
	1	1729985	AtoG	-	HG00154,NA20797,HG00110,HG00237,NA11830,HG00332,NA20771,NA06994,NA12843,HG00344,NA12546,HG00131,HG00256,HG00139	14	1	0	1
	1	1729993	AtoG	-	NA20771,NA12873,NA20589,NA20512,HG00119,HG00234,HG00118,HG01791,NA11830,HG00361,NA12347,NA12154,HG00313,HG00267,NA12890,HG00369,NA10847,HG00112,NA20800	19	0	0	0
	1	1730006	AtoG	-	HG00265,NA19138	2	0	0	0
	1	1730007	AtoG	-	NA20532,HG00265,NA19138	3	0	0	0
	1	1730027	AtoG	-	HG00110,NA11830,NA12751,NA20581,HG00267,HG00234,NA11832,HG00355,NA12812,HG00323,HG00133,NA06986,HG00139,NA20524,HG00132,HG00325,HG00185,HG00187,NA12275,NA20790,HG00313,NA20802,HG00328,NA20512,HG00118,HG00138,NA10847,NA12347,HG00119,HG00361,NA11831,NA12873,HG00158,HG00142,HG00157,HG00250,HG00146,NA20797,HG00265,HG00105,HG00369,HG00344,HG00136,NA12283,NA20800,NA12814,HG01789,HG00332,HG00131,NA20768…	53	1	0	1
	1	1730032	AtoG	-	NA06985,NA12812,NA20519,HG00112,NA12347,NA12889,HG00356,NA12873,HG00361,HG00158,HG00136,NA12815,NA12275,HG00311,HG00121,HG00131,NA12872,NA12843,HG00237,HG00369,HG00232,NA12751,NA20581,NA20790,HG00129,HG00118,HG00185,HG00100,HG00137,HG01789,NA20532,NA07056,HG00177,NA10847,NA20524,NA20800,HG00325,NA12762,NA12890,HG00244,NA20802,HG00250,HG00117,NA20589,NA12763,HG00243,NA20805,NA06986,HG01791,NA07051…	123	1	0	1
	1	1730042	AtoG	-	HG00137,NA11832,HG00250,NA12275,NA11830,HG00158,HG00244,NA20800,HG00344,HG00133,HG00138,HG00187,HG00118,NA12004,NA06986	15	1	0	1
	1	1730045	AtoG	-	HG00133,NA20802	2	1	0	1
	1	1730053	AtoG	-	NA11831,NA12874,HG00133,HG00355,NA12283,HG00119,NA20527,NA20772,NA12058,NA10847,HG00117,HG00325,HG00237,HG00131,HG00105,HG00146	16	1	1	1
	1	1731034	AtoG	-	NA11893,NA06986	2	1	0	1
	1	1731108	AtoG	-	NA20527,NA20765,NA11893,NA06986	4	1	1	1
	1	1731165	AtoG	-	NA20527,NA19159,HG00355,HG00117,NA06986,HG00099,HG00111,NA07347,NA19095	9	1	1	1
	1	1731171	AtoG	-	NA06986,NA11893,NA19159,NA20527	4	1	1	1
	1	1731188	AtoG	-	HG00117,NA06986,NA20527,HG00355,NA19159,NA19095	6	1	1	1
	1	1731213	AtoG	-	NA12399,HG00285,NA12761,NA19159,NA06986,NA19141,NA20765,HG00234,NA20527	9	1	1	1
	1	1731249	AtoG	-	NA12761,NA20527	2	1	1	1
	1	1731255	AtoG	-	NA19116,HG00117,NA12761,NA06986,NA18912,NA19141,NA19159,NA20527,NA19095,HG00355,HG00285,HG00234	12	1	1	1
	1	1731265	AtoG	-	NA19095,HG00234,NA19141,NA12761,HG00355,NA19159,NA12399,HG00285,NA18912,HG00117,NA20527,NA06986	12	1	1	1
	1	1731268	AtoG	-	NA19095,HG00117,NA20527	3	1	1	1
	1	1731269	AtoG	-	HG00355,NA20527,NA06986,HG00285,NA18912,NA19095,NA12399,NA19159	8	1	1	1
	1	1731290	AtoG	-	NA06994,NA20527,NA12761,NA12814,NA19223,HG00309,HG00142,HG00117,NA19095,NA19159,NA06986	11	1	1	1
	1	1731294	AtoG	-	NA20513,NA12399,HG00309,HG00131,NA19223,NA18486,NA18511,NA12761,NA19116,NA11831,HG00321,NA06994,HG00117,NA20527,HG00142,NA19159,NA20765,NA19095,NA18912,NA12763,NA12814,NA06986,HG00355	23	1	1	1
	1	1731295	AtoG	-	HG00309,NA19095,HG00142,NA12761,NA06994,NA20513,HG00117,NA19116,HG00131	9	1	0	1
	1	1731315	AtoG	-	NA11893,NA18486,NA12842,HG00126,HG00309,NA11831,NA18502,NA12873,NA12156,HG00117,NA12399,NA20765,NA06986,NA19159,NA07357,NA12275,HG00355,NA12814,HG00119,NA20527,HG00097,NA12716,NA20772,NA12763,NA18912,HG00114,NA19095,NA12749,HG00111,NA06994,HG00142,HG00146,HG00234,NA12761,NA12058,HG00240,HG00325,HG00133,HG00361,NA20532,NA19223,NA07048,NA19092,HG00321,HG00131	45	1	1	1
	1	1731325	AtoG	-	NA18486,NA19172,NA11893,NA20513,HG00131,NA12873,NA07357,HG00139,HG00361,NA19095,HG00234,NA19116,NA19141,HG00277,HG00146,HG00239,HG00355,NA07056,HG00325,NA18908,NA20530,HG00097,HG00119,NA19206,HG00137,NA12058,NA20772,NA12717,NA18912,NA06994,NA07048,NA19236,NA12763,NA20532,NA20519,NA12399,HG00232,NA18511,NA20528,HG00142,NA19137,NA12842,NA19223,NA20527,HG00111,HG00143,NA12751,NA11831,NA20765,NA12814…	62	1	1	1
	1	1731354	AtoG	-	HG00321,HG00119,NA12873,NA07048	4	1	1	1
	1	1731742	AtoG	-	NA06986,NA20513	2	0	0	1
	1	1731748	AtoG	-	NA18486,NA20513	2	0	0	1
	1	1731756	AtoG	-	NA20513,NA06986	2	0	0	1
	1	1731783	AtoG	-	NA20513,HG00127,NA06986,NA18486	4	1	0	1
	1	1732190	AtoG	-	NA06986,NA19256	2	1	0	1
	1	1732955	AtoG	-	NA20527,HG00117	2	1	0	1
	1	1732995	AtoG	-	HG00355,HG00119,HG00117,NA20527	4	1	1	1
	1	1733036	AtoG	-	HG00355,NA20527,HG00119,HG00117	4	1	0	1
	1	1733042	AtoG	-	HG00117,HG00355,NA20527	3	1	0	1
	1	1733139	AtoG	-	NA20765,NA20527	2	1	0	1
	1	2366739	AtoG	-	NA19095,NA20527,HG00117	3	1	0	1
	1	2366763	AtoG	-	NA18511,NA20527,NA19095,NA06986,HG00117	5	1	0	1
	1	2366767	AtoG	-	NA06986,NA19095,NA20527	3	1	0	1
	1	2366773	AtoG	-	NA06986,HG00355,NA18511	3	1	0	1
	1	2366815	AtoG	-	NA20527,HG00355,NA06986,NA12058	4	1	1	1
	1	2367372	AtoG	-	HG00355,NA19095,NA06986	3	1	0	1
	1	2367402	AtoG	-	NA06986,NA12058	2	1	0	1
	1	2367403	AtoG	-	NA12058,HG00355	2	1	0	1
	1	2367409	AtoG	-	HG00355,NA12058	2	1	0	1
	1	2367448	AtoG	-	NA19095,NA06986,HG00117	3	1	0	1
	1	2368799	AtoG	-	NA18912,HG00117,NA06986	3	1	0	1
	1	2368802	AtoG	-	NA19095,HG00117	2	1	0	1
	1	2371845	AtoG	-	HG00355,NA20527	2	1	0	1
	1	2371846	AtoG	-	NA20527,NA06986,HG00355	3	1	1	1
	1	2371862	AtoG	-	NA06986,NA20527,HG00355	3	1	0	1
	1	3785930	AtoG	-	NA11831,NA18511,NA06986,NA20765,NA19159,NA18934,NA19095,NA18486,NA19197,NA20527	10	1	1	1
	1	3785972	AtoG	-	NA19197,NA19146,NA19131,HG00117,HG00355,NA19099	6	1	0	1
	1	3785975	AtoG	-	NA19159,NA18486	2	1	0	1
	1	3785981	AtoG	-	HG00384,NA19146	2	1	0	1
	1	3785991	AtoG	-	NA19159,NA19099,NA19206,NA20765	4	1	0	1
	1	3785998	AtoG	-	NA19236,NA20807,NA19131,NA19146,HG00376,HG00259,NA12815,NA06986,NA19200,NA12283,NA20765,NA19206,NA20538,HG00117,NA19152,HG00384,NA19198,NA19130,NA19141,HG00313,NA19147,HG00355,NA20527,NA19095,NA11893,NA18486,HG00097,HG00365,NA18923,NA18934,NA19099,HG00321,NA12763	33	1	1	1
	1	3786017	AtoG	-	NA19146,HG00355,NA19223,NA19197,NA12399,HG00097,NA19206,HG00117,NA18923,HG00259,NA19159	11	1	0	1
	1	3786034	AtoG	-	NA19159,NA19146,NA18486,HG00355,NA18934,HG00097	6	1	0	1
	1	3786086	AtoG	-	NA19223,NA12283,NA19209,NA19141,NA12286,HG00355	6	1	1	1
	1	3786129	AtoG	-	NA18934,NA19141,NA12761,NA19159,NA20527,HG00355,NA06986,NA19131,HG00117,NA12283	10	1	1	1
	1	3786142	AtoG	-	HG00117,NA12761,NA20527	3	1	1	1
	1	3786143	AtoG	-	NA18934,NA19131,HG00117	3	1	0	1
	1	3786241	AtoG	-	NA19095,NA20527,NA19223,HG00355,NA19131	5	1	0	1
	1	3786255	AtoG	-	HG00117,NA19131,HG00355,NA20527	4	1	0	1
	1	3786306	AtoG	-	NA06986,NA20527,HG00355,NA12761,NA19095,NA20765,NA20509,NA12751,NA19197,NA12763,NA19116,HG00117,NA19131,NA19159	14	1	1	1
	1	3786368	AtoG	-	HG00259,NA19131	2	1	0	1
	1	3786376	AtoG	-	HG00355,NA18912,NA06986,HG00117,NA19131,NA20527,HG00119,NA19095	8	1	1	1
	1	3786388	AtoG	-	NA18912,NA19131,HG00117,NA19095,NA18486,NA19116,NA06986,NA19197,NA20527,HG00355,NA20765,HG00259	12	1	1	1
	1	3786400	AtoG	-	NA18486,NA20527,HG00355,NA19121,NA20765,NA06986,HG00117,NA18912,NA19116,NA18934,HG00119,NA18916,HG00259,NA19159,NA19095,NA19131	16	1	1	1
	1	3786417	AtoG	-	HG00117,HG00355,NA19247,NA19130,NA20527,NA18486,HG00259,NA19095,NA19116,NA19118,NA18934,NA19146	12	0	0	1
	1	3786418	AtoG	-	HG00355,NA06986,HG00117,NA18486,NA19116,NA19131,NA20527,NA19146	8	1	1	1
	1	3812675	AtoG	-	NA12777,NA20518,HG00137	3	1	0	1
	1	3812728	AtoG	-	HG00138,HG00142	2	1	0	1
	1	3812753	AtoG	-	HG00188,NA19095,NA20527,HG00338,HG00126,NA18912,HG00131,HG00137,NA20772,NA20512,NA20518,HG00138,NA20519,HG00142,NA07347	15	1	1	1
	1	3812777	AtoG	-	NA19095,NA20772,NA20518,HG00188,NA18912,NA20527,HG00126	7	1	0	1
	1	3812778	AtoG	-	NA07347,NA20519	2	1	0	1
	1	3812793	AtoG	-	HG00137,HG00338	2	0	0	0
	1	3812814	AtoG	-	NA18912,NA20512,HG00138,NA20519,HG00142,HG00188,NA20527,NA12777,HG00137,HG00338,NA20772,NA20518	12	1	1	1
	1	3813232	AtoG	-	NA12829,NA20527	2	0	0	0
	1	3813267	AtoG	-	NA20509,NA20772	2	1	0	1
	1	3813286	AtoG	-	HG00117,NA12829,NA20772,NA06986,NA20543	5	1	0	1
	1	3813293	AtoG	-	NA11830,NA20527,NA20828,NA06985,NA06986,NA18486,NA20515,NA20543,NA19108,HG00355,HG00259,NA12716,NA18511,NA18916,NA19159,HG00117,NA20772,NA19200,NA18912,NA12829	20	1	1	1
	1	3813303	AtoG	-	NA18916,HG00355,NA19159,NA20527,HG00117,NA20828,NA11830,NA12829	8	1	0	1
	1	3813308	AtoG	-	NA19200,NA18916,HG00117,NA11830	4	1	0	1
	1	3813313	AtoG	-	NA06986,NA20772,HG00355,HG00259,NA18934	5	1	0	1
	1	3813347	AtoG	-	NA18511,HG00259,NA20543,NA19159,NA20828,NA06986,NA20519,NA12829,NA06985,NA19200,NA19108,HG00355,NA18934,HG00117,NA20515,NA12716,NA20527,NA20509,NA18486	19	1	0	1
	1	3813348	AtoG	-	NA06986,NA18486,NA12829,HG00355,NA18912,NA20527	6	1	0	1
	1	3813356	AtoG	-	NA20527,NA20509,NA18511,NA12716,NA19159,NA06986,HG00117,HG00259,NA18934,HG00355,NA12829,NA06985	12	1	1	1
	1	3813357	AtoG	-	NA06986,NA20509,HG00117	3	1	1	1
	1	3813358	AtoG	-	NA18511,NA18486,NA12716,NA19108,NA20515,NA18912,HG00259,NA06986,HG00355,NA06985,NA12829,NA20519,HG00117,NA20527,NA20509,NA19159,NA18934	17	1	1	1
	1	3813362	AtoG	-	NA06986,NA20515,NA18511,HG00117,NA20527,NA12716,NA20509,NA19108,NA20519,HG00259,NA19159,HG00355,NA18486	13	1	0	1
	1	3813366	AtoG	-	HG00355,NA18486,NA18511,HG00117	4	1	1	1
	1	3813379	AtoG	-	NA19159,NA12716,NA19108,NA18912,NA06986,HG00117,NA20527	7	1	1	1
	1	3813389	AtoG	-	NA20527,NA06986,HG00117,HG00355	4	1	1	1
	1	3813594	AtoG	-	HG00117,NA20527,HG00355,NA06986	4	1	1	1
	1	3813607	AtoG	-	HG00355,HG00117	2	1	0	1
	1	3813666	AtoG	-	HG00355,HG00117	2	1	1	1
	1	3813683	AtoG	-	HG00117,HG00355	2	1	1	1
	1	3813686	AtoG	-	HG00117,HG00355	2	1	1	1
	1	3813738	AtoG	-	HG00117,NA06986,HG00355	3	1	1	1
	1	3813741	AtoG	-	HG00117,HG00114,HG00355,NA06986	4	1	1	1
	1	3813750	AtoG	-	NA19159,NA06986,HG00117,HG00355	4	1	0	1
	1	3813763	AtoG	-	NA06986,HG00181,NA20772,HG00116,HG00130,NA12234,NA19223,NA07051,NA18486,HG00355,NA19190,NA12156,HG00096,NA12058,NA19159,HG00114,NA12716,HG00117	18	1	1	1
	1	3813764	AtoG	-	NA12058,NA19159,NA06986,NA20772,HG00130,HG00117	6	1	0	1
	1	3813767	AtoG	-	HG00181,HG00138,NA19159,NA12156,NA12058,HG00116,NA07051,HG00117,NA18486,NA12234,NA19223,NA12716,NA06986,HG00328,NA20772,HG00130,HG00355,NA19190,HG00114,HG00096,NA20771	21	1	1	1
	1	3813768	AtoG	-	HG00328,NA19190,HG00114,NA07051,NA19223,NA19159,NA12156,NA12829,NA18486,NA12234,NA20771,NA06986,HG00096,HG00355,HG00117,HG00138,NA12058,HG00116	18	1	0	1
	1	3813787	AtoG	-	HG00116,HG00138,HG00117,HG00355,HG00181,NA20772,NA18498,NA19190,HG00111,NA19107,NA19099,NA19159,NA18486,NA12829,NA12156,NA06986,NA20771,HG00132,NA11830,HG00328,NA12399,HG00114,NA07051,NA12716	24	1	1	1
	1	3813788	AtoG	-	HG00328,NA19107,NA18498,NA19099,NA11830	5	1	0	1
	1	3813791	AtoG	-	HG00119,HG00136	2	1	0	1
	1	3813803	AtoG	-	NA19190,NA12399,NA18489	3	1	0	1
	1	3813811	AtoG	-	HG00185,NA19248,NA18489,HG00325,NA11840,NA19119,HG00271,NA20534,NA18909,HG00149,HG01791,HG00137,HG00376,NA19207,NA07037,NA19175,NA12156,NA12413,NA20803,NA20783,HG00309,NA19118,NA20519,NA18868,NA19152,HG00306,NA20785,NA20527,HG00313,HG01334,NA20504,NA20786,NA12286,NA19095,HG00335,NA18934,HG00119,NA19223,NA18486,HG00239,NA19093,HG00131,NA12058,HG00097,NA20807,HG00133,NA20814,NA19222,HG00117,NA12763…	53	1	0	1
	1	3813836	AtoG	-	HG00337,NA19236,NA19206,NA19222,NA11994,NA18934,HG00150,NA20754,HG00244,NA19092,HG00116,NA12058,NA12717,HG00237,HG00369,NA20801,HG00117,NA12873,NA20528,HG00331,HG00367,NA12282,NA12154,NA18498,NA19223,NA11830,HG00274,NA20505,NA19235,NA06986,HG00343,NA19225,NA20504,NA19185,NA20796,HG00341,NA19207,HG00325,NA20772,NA19160,HG00132,HG00136,HG00106,HG00141,NA20785,NA11832,NA19190,NA19247,NA19189,NA20803…	98	1	1	1
	1	3813871	AtoG	-	HG00355,NA20771,NA20504,HG00119,NA19099,NA20803,NA12234,NA11830,HG00131,HG00114,NA19107,NA12829,NA12399,HG00138,NA20785,HG00309,NA12058,HG00132,NA18489,HG00136,HG00111	21	0	0	0
	1	3827076	AtoG	-	HG00117,NA20527	2	1	1	1
	1	3844915	AtoG	-	HG00235,NA07000	2	0	0	0
	1	3883678	AtoG	+	HG00178,HG00320,NA07000,NA20792	4	0	0	0
	1	5866447	AtoG	-	NA12156,NA19160	2	0	0	0
	1	6098502	AtoG	+	HG00237,NA07000	2	0	1	0
	1	6188169	AtoG	-	HG00131,HG00117	2	1	1	1
	1	6191826	AtoG	-	NA19095,HG00117	2	1	1	1
	1	6192125	AtoG	-	HG00355,HG00117,NA06986,NA19095	4	1	1	1
	1	6192142	AtoG	-	HG00117,HG00355	2	1	0	1
	1	6192164	AtoG	-	NA19256,HG00117,HG00355,HG00309,NA19095,NA06986	6	1	1	1
	1	6192187	AtoG	-	HG00117,HG00355,NA19095	3	1	1	1
	1	6192246	AtoG	-	NA19095,HG00117,NA06986,NA20765,HG00355,NA20527,NA20509,NA19159	8	1	1	1
	1	6192652	AtoG	-	HG00355,HG00131	2	1	0	1
	1	6217104	AtoG	+	NA20527,HG00117	2	1	1	1
	1	6217108	AtoG	+	NA20527,HG00117	2	1	1	1
	1	6218354	AtoG	+	HG00237,NA20785	2	0	1	0
	1	6219746	AtoG	+	NA07048,NA06986	2	1	0	1
	1	6219812	AtoG	+	HG00355,NA18511,NA19159,HG00131,HG00142,HG00141,NA19197,HG00117,NA07048,NA20772,NA12156	11	1	1	1
	1	6219813	AtoG	+	NA12156,NA07048,NA12716,NA12842,NA12829,HG00127,HG00117,NA11831,NA20758,HG00355,HG00309,NA19108,NA06986,NA12761,NA19197,HG00142,NA20531,HG00139,HG00259,HG00131,HG00183	21	1	1	1
	1	6219852	AtoG	+	NA07048,HG00127,NA19108,HG00183,HG00325	5	1	0	1
	1	6219876	AtoG	+	HG00141,NA12762	2	0	0	1
	1	6219890	AtoG	+	NA19190,NA07048,NA18511,NA12829,HG00259,HG00127,HG00141,NA19108,HG00183,NA12156,HG00117,NA20758,HG00335,NA06986,HG00309,HG00325,HG00321,NA19197,NA12762,HG00355	20	1	1	1
	1	6219897	AtoG	+	HG00309,NA18511,NA20531,NA12156	4	1	1	1
	1	6219909	AtoG	+	NA18511,NA19190,HG00131,NA19159,HG00321,NA12842,NA20531,HG00325,HG00335,HG00127,NA20772,NA12156,NA12762,HG00355,HG00259,NA06986,NA12761,HG00137,HG00309,HG00142,HG00117,HG00139,NA19108,NA07048,NA12058,HG00141,NA12716,NA12829	28	1	1	1
	1	6219914	AtoG	+	HG00309,NA20531	2	1	1	1
	1	6219926	AtoG	+	NA20531,NA19159,NA12058,NA12156	4	1	1	1
	1	6219936	AtoG	+	NA19197,NA12058	2	1	1	1
	1	6219962	AtoG	+	HG00335,NA12275	2	0	0	1
	1	6219972	AtoG	+	NA12842,HG00137	2	1	1	1
	1	6219977	AtoG	+	NA19197,NA11831,HG00117,HG00111,NA12275,HG00141,NA12058,HG00309,NA12829,NA12716,NA12156,HG00325,HG00321,NA20531,HG00259,NA19190,NA12761,NA19108,NA20758,HG00263,HG00355,NA18511,NA06986	23	1	1	1
	1	6219981	AtoG	+	HG00263,NA12761,HG00139,NA12275,HG00111,NA20772,NA11831,NA19197,NA12156,HG00137,HG00127	11	1	1	1
	1	6220032	AtoG	+	NA11831,HG00111,NA12058,NA12761	4	1	0	1
	1	6222148	AtoG	-	HG00266,NA20543,NA12874,NA19114,NA19113,HG00105	6	0	0	1
	1	6222155	AtoG	-	NA19098,NA20786,HG00328,HG00185,NA20527,HG00349	6	1	0	1
	1	6222164	AtoG	-	NA11894,NA19146,NA19116,NA19108,NA12842,NA18916,NA20516,NA11994,NA20804,NA20771,NA12155,NA20532,HG00114,NA11829,NA11843,NA18912,HG00111,NA19257,NA20586,NA11832,NA18486,NA20758,HG00185,HG00149,NA12058,NA20796,NA12144,HG00251,NA20812,NA19114,NA06986,NA12873,NA12874,HG00349,NA19113,NA07037,NA19236,NA12814,HG00274,HG00253,NA07051,HG00337,HG00105,HG00328,HG00099,NA12413,HG00141,NA11831,NA19223,HG00356…	97	1	1	1
	1	6222176	AtoG	-	NA12058,NA20532,HG00253,NA12751,HG00378,NA20796,HG00231,NA19093,NA12006,HG00309,HG00251,NA12144,NA20507,NA19222,NA12156,NA20527,NA19257,HG00145,NA18912,NA11843,HG00117,NA19116,NA19098,NA19146,HG00108,HG00367,NA20512,NA18934,NA20812,HG00328,NA20516,NA19108,HG00114,NA11832,NA19143,HG00158,NA07037,NA07347,NA19223,NA20803,HG00355,NA12718,HG00282,NA20771,NA19114,NA12716,NA20765,NA20543,NA12814,HG00338…	86	1	1	1
	1	6222177	AtoG	-	HG00105,NA18916,HG00099,NA12155,NA20771,NA12814,NA07051,HG00111,NA19113,NA20509,HG00274,NA18486,HG00185,HG00338,NA20752,NA12776,NA19223,NA11894,NA20532,NA20507,HG00309,NA19257,HG00251,NA12156,HG00117,NA11994,NA19098,HG00108,NA19146,NA07037,NA20803,NA06986,NA11843,NA18912,NA18934,NA20527,NA12006,NA12751,HG00253,NA19160,NA12873,NA20515,NA20812,NA19095,HG00116,NA20796,NA19114,HG00145,NA20814,NA20798…	64	1	0	1
	1	6222178	AtoG	-	NA07051,NA12814,HG00355	3	1	1	1
	1	6222195	AtoG	-	NA19095,NA19222	2	1	0	1
	1	6222238	AtoG	-	NA20527,HG00251	2	1	1	1
	1	6222241	AtoG	-	NA20527,NA19095	2	1	1	1
	1	6222255	AtoG	-	HG00259,HG00117,NA12889,NA12156,NA19236,NA12144,NA19222,NA20527,NA07347,NA11829,NA12413,NA20586,NA20796,HG00274,NA20786,NA20765,HG00378,NA12751,HG00251,HG00141,NA19143,NA20512,NA20752,HG00105,HG00338,HG00099,NA19146,NA20516,NA19095,HG00355,HG00349,NA12716,NA12155,NA11832,HG00114,HG00328,NA19116	37	1	1	1
	1	6222258	AtoG	-	NA19146,HG00114,HG00328,NA19143,NA12058,HG00236,HG00111,NA11829,NA12751,HG00355,NA20527,NA12874,NA19095,NA12006,HG00105,HG00099,NA19114,NA10847,NA12043,NA12144,NA18912,NA11843,NA19093,HG00117,NA11832,NA12155,NA20786,NA06986	28	1	1	1
	1	6222264	AtoG	-	NA12155,NA19095,NA20804,NA12776,NA18502,HG00244,NA12842,NA11832,HG00251,HG00112,NA18486,NA06986,HG00236,NA20515,HG00117,NA11843,NA07347,HG00328,NA12058,NA12413,NA20758,NA12716,HG00349,NA19200,HG00355,NA12874,NA20786,NA20796,HG00105,NA20752,HG00149,NA12043,HG00378,NA19222,NA20512,NA12761,NA20543,HG00099,NA19143,HG00111,NA12718,NA12006,NA19146,HG00114,HG00367,NA12751,HG00253,NA20527,NA10847,HG00338…	67	1	1	1
	1	6222275	AtoG	-	HG00111,NA12776,NA19222,NA18934,NA20512,NA20543	6	1	0	1
	1	6222301	AtoG	-	HG00114,NA18912,NA18909,NA12156,NA19222,HG00123,NA12889,NA18870,HG00117,NA12287,NA19146,HG00355,HG00138,NA12155,NA12842,NA20589,NA20786,NA11843,NA19256,NA12814,NA20803,HG00328,HG00251,NA20813,NA20535,HG00112,NA12413,NA12006,NA06986,NA19143,NA07347,NA20807,NA18908,HG00259,NA18486,HG00099,NA12718,HG00105,NA19214,NA20758,NA20516,HG00338,HG00325,NA20543,NA20515,HG00143,NA12761,NA20527,NA20796,NA12751…	53	1	0	1
	1	6222311	AtoG	-	NA20529,NA19108,NA12058,NA12761,NA19214,NA07347,NA19256,NA18486,NA20758,NA20509,HG00367,NA20810,HG00111,NA12413,HG00328,NA12776,NA06986,NA20803,NA19146,NA18870,HG00349,NA19200,NA18502,NA12043,NA20502,NA12340,NA12716,NA18498,HG00105,HG00236,NA12751,NA20589,NA12006,NA18511,NA12144,NA12827,NA19222,NA19093,NA11843,HG00114,HG00274,NA20813,NA18912,NA20786,NA20765,NA12842,NA19185,NA18916,HG00259,NA20527…	81	1	0	1
	1	6222314	AtoG	-	HG00105,NA07347,NA20535,HG00117,NA18934,NA20796,NA18486	7	1	0	1
	1	6222323	AtoG	-	NA11994,NA19222,NA20795,NA19116,NA12043,NA19146,NA11832,NA19093,NA20516,NA18502,NA20809,HG00138,HG00111,NA06986,NA20765,HG00244,NA12234,NA20543,NA20813,NA20758,HG00141,NA18486,NA19095,NA20786,NA19113,NA20534,HG00112,NA12718,NA18511,HG00355,NA19256,HG00259,NA20586,HG00114,NA12413,HG00328,NA18912,HG00116,NA12716,NA18870,NA18934,NA20796,HG00251,NA20506,NA20527,NA12144,HG00337,NA20512,HG00367,NA19108…	57	1	1	1
	1	6222340	AtoG	-	NA12058,NA18511,NA19222,NA20798,NA20529,HG00159,NA19093,NA19214,NA12761,NA07347,HG00143,NA20785,NA11832,NA12043,NA12340,NA19141,HG00345,HG00328,HG00115,NA12400,NA20516,NA07051,NA20795,NA20807,NA18909,NA19114,NA12873,NA12155,NA20796,NA12814,NA11829,HG00105,NA20535,NA20804,HG00325,NA12751,HG00263,NA11920,NA12006,NA12283,HG00112,NA20543,NA12716,NA19171,NA20790,HG00183,NA19131,NA07357,HG00131,NA19095…	138	1	1	1
	1	6222341	AtoG	-	NA12413,HG00149,HG00251,NA19131,HG00117,NA18870,NA20502,NA19143,NA20507,HG00137,NA18933,HG00360,HG00338,HG00378,HG00349,HG00262,HG00143,NA20810,NA12234,NA20785,NA06986,HG00183,NA18502,HG00138,NA19146,NA11832,NA19141,NA12043,NA11992,NA12776,NA12340,HG00259,NA07347,NA20752,NA18908,NA20529,NA20809,NA18511,HG00159,NA20758,HG00111,NA20807,HG00274,NA20795,NA12761,NA19093,NA19214,NA12874,NA07357,NA20543…	134	1	1	1
	1	6222360	AtoG	-	HG00271,NA20771,NA07048,NA19223,NA18486,NA20509,HG00115,NA12827,HG00360,NA11894,NA20790,HG00117,NA19141,NA11829,NA19210,HG00141,NA12842,NA20803,NA20810,NA12889,NA20512,NA20507,HG00131,HG00105,NA19131,NA19171,NA20586,HG00114,NA20758,HG00123,NA10847,NA12058,HG00111,NA20807,NA20786,NA20502,NA12340,NA12006,NA20516,NA20796,HG01334,NA20543,NA20589,NA20798,HG00122,HG00328,NA20765,HG00378,NA19190,HG00112…	55	1	1	1
	1	6222361	AtoG	-	NA12283,NA19185,HG00159,NA20543,HG00122,NA20786,NA11843,NA20758,HG00338,HG00117,NA07357	11	1	0	1
	1	6222366	AtoG	-	NA12058,NA11894,NA20810,NA12829,NA18502,NA20543,NA18867,NA19143,NA19171	9	1	0	1
	1	6222385	AtoG	-	NA11832,NA19210,HG00114,NA20813,HG00369,HG00265,HG00349,NA19131,HG00328,NA11920,NA18933,NA19223,NA12889,NA20582,NA20785	15	1	0	1
	1	6222426	AtoG	-	HG00137,NA07048	2	0	0	1
	1	6222427	AtoG	-	NA07048,HG01334,NA19131,HG00262,HG00345,HG00313,HG00137,NA20800,HG00183,HG00265,NA19143	11	1	0	1
	1	6222527	AtoG	-	HG00265,HG00345,NA20765,HG00262,HG01334,NA20800,NA07048,NA11831,HG00313,HG00183,NA19143,NA19214,NA19131,HG00137	14	1	1	1
	1	6223184	AtoG	-	NA20534,NA19197,HG00242,NA19108,NA12762,NA19129,NA11843,NA11894,HG00320,HG00108,NA18923,NA20515,HG00117,NA18912,NA12776,NA18916,HG00185,NA20758,HG00346,NA07048,HG00284,NA19210,HG00262,HG00379,NA20581,HG00122,NA20516,NA19118,NA20507,NA18519,HG00375,HG00253,NA19175,NA11830,NA12829,HG00258,HG00231,NA20799,NA12890,NA12763,NA20792,NA12347,HG00360,NA11992,NA11831,NA12144,NA19257,HG00112,NA20826,NA20811…	213	1	1	1
	1	6223197	AtoG	-	NA12761,NA18910	2	1	0	1
	1	6223200	AtoG	-	HG00328,NA19113,HG00315,NA11994,NA20811,NA20826,NA12144,NA19257,NA11831,NA11992,NA12347,HG00337,HG00231,NA12489,HG00258,NA12829,NA12413,HG00253,NA18917,NA07051,HG00239,NA19213,NA18909,NA20517,NA18910,NA12383,NA18519,NA20535,HG00159,NA20508,HG00356,NA20585,NA12340,NA19149,NA19171,HG00355,NA12058,NA19256,NA20588,HG00122,NA20804,HG00141,NA19236,NA19210,HG00284,NA07048,HG00099,NA18916,NA20534,NA18912…	231	1	1	1
	1	6223204	AtoG	-	NA20581,NA19257,HG00260,NA20801,NA12413,NA20512,NA20814,NA18502,NA07347,NA19092,NA19213,HG00282,NA19172,NA18486,NA12763,NA20813,NA20799,NA18934,NA11830,NA20542,NA11930,NA19214,NA19121,NA20509,HG01334,HG00346,HG02215,NA18488,HG00342,HG00139,NA12273,NA20588,NA18923,NA18511,NA19222,NA12283,NA12006,NA19137,NA12489,NA11992,NA18510,NA20528,HG00133,NA12751,NA07051,NA20521,NA19093,HG00244,NA20756,HG00258…	209	1	1	1
	1	6223205	AtoG	-	NA20758,HG00128,NA18933,NA20581,NA19257,NA12283,NA18867,NA12751	8	1	0	1
	1	6223213	AtoG	-	NA12413,NA12761,NA07051,NA20529,HG00258,NA20812,NA20815,HG00141,NA19213,NA20809,NA19092,NA07347,HG00143,HG00253,NA12814,NA18916,NA18933,NA20515,NA07048,NA18934,NA20813,HG00311,NA20581,HG00255,NA12286,HG00108,HG00180,NA19129,NA20532,NA20765,NA18520,NA12043,NA20811,NA19257,HG00251,NA18511,HG00231,NA12489,NA19146,NA12874,NA12751,HG00133,NA06986,NA20797,HG02215,NA12045,NA12273,NA19198,NA11893,NA12383…	88	1	0	1
	1	6223216	AtoG	-	NA20517,HG00329,NA20826,HG00111,NA19175,HG00325,NA12872,NA12873	8	1	0	1
	1	6223219	AtoG	-	NA18486,HG00141,HG00244,NA12347,NA18909,HG00133,NA19171,NA11992,NA20798,HG00309,NA19118,HG00122	12	1	0	1
	1	6223223	AtoG	-	NA19143,NA18934,NA12762,NA20516,NA18486,HG00242,NA19108,NA12760,NA19257	9	1	0	1
	1	6223229	AtoG	-	HG00315,HG00379	2	1	0	1
	1	6223232	AtoG	-	NA18502,HG00105,HG00379,HG00149,NA19222,NA19197,NA19118,NA18934,NA12873,NA20786,HG00108,NA18867,HG00099,NA18909	14	1	0	1
	1	6223236	AtoG	-	HG00379,NA20509,HG00105,NA19197,NA20813,HG00311,NA20534,NA12287,NA12814,NA19119,NA20527,HG00117,NA11894,NA19098,NA20804,NA20807,NA11893,NA20757,NA20795,NA19108,NA20532,NA19143,NA12873,HG00367,NA18502,NA19114,NA11831,NA20765,NA12489,NA12144,HG00309,NA20815,HG02215,NA18511,NA20518,HG00356,HG00149,HG00159	38	1	1	1
	1	6223240	AtoG	-	NA12872,NA19206,HG00105,NA12489,NA19108,NA20509,NA19143	7	1	0	1
	1	6223245	AtoG	-	NA12154,NA19198,NA19200,HG00369,NA18909,HG00242,HG00099,HG00105,NA12873,NA20814,HG00253,NA19204,NA19108,NA12282,NA20812,NA19102,NA12889,NA19118,NA20509,NA11930,HG00255,NA19171,HG00313,NA19114,HG00258,NA19121,NA20765,NA19146,NA20512,NA11893,HG00143,NA12058,NA20527,NA18910,NA18912,NA12814,NA20813,NA07000,HG00311,NA18486,NA18934,HG00117,NA20786,NA18916,NA20754,NA20543,NA19210,NA20804,NA20807,NA19098…	69	1	1	1
	1	6223246	AtoG	-	NA12874,HG00383,NA20812,NA19114,HG00119,HG00355,NA20529,HG00143,NA12154,HG00149,NA18916,NA20752,NA20543,NA20807,HG00138,NA19146,NA19222,NA06986,NA20535,NA18912,NA19200,HG00105,NA20795,NA18502,HG00242,NA20509,NA12814,NA12347,NA18486,NA19171,NA11930,NA20527,HG00099,NA18909,NA19204,NA19121,NA19098,NA18934,NA20512,NA19108,NA12872,NA20786,HG00337,NA20815,NA20803,HG00244,NA20814,NA19102,NA20765,NA19093…	59	1	1	1
	1	6223272	AtoG	-	NA20527,NA18934	2	1	0	1
	1	6223276	AtoG	-	NA20527,NA18502	2	1	0	1
	1	6223279	AtoG	-	NA06986,NA20509,NA18502	3	1	0	1
	1	6223282	AtoG	-	NA20527,NA18502	2	1	1	1
	1	6223288	AtoG	-	NA20527,HG00355,NA18502	3	1	1	1
	1	6223304	AtoG	-	HG00355,NA18909,HG00117,NA20527	4	1	0	1
	1	6223305	AtoG	-	NA20527,HG00117,NA18909,NA18912,HG00355	5	1	1	1
	1	6223336	AtoG	-	HG00355,NA19108,HG00117,NA20527	4	1	0	1
	1	6223374	AtoG	-	NA20516,HG00355,HG00117	3	1	0	1
	1	6223379	AtoG	-	HG00355,NA18934,NA20527,NA20516,NA18912,NA20765,NA20509,NA18502,NA06986,NA12814,HG00139,NA20581,NA12058,HG00117,NA18486,NA18909	16	1	1	1
	1	6223380	AtoG	-	HG00355,NA20527,NA18912,NA20509,NA20765,NA18502,HG00139,NA12814,NA18486,NA12058,NA18909,NA06986,HG00117,NA20581,NA20516,NA18934	16	1	1	1
	1	6223388	AtoG	-	HG00139,NA20509,NA20765,NA12058,NA20527,NA18934,NA20516,HG00355,NA18912,NA12814,NA18502,HG00117	12	1	0	1
	1	6251893	AtoG	-	NA06986,HG00343	2	1	0	1
	1	6251894	AtoG	-	NA06986,HG00343	2	1	0	1
	1	6251933	AtoG	-	NA06986,HG00343	2	1	0	1
	1	6251934	AtoG	-	NA19257,HG00117	2	1	0	1
	1	6522087	AtoG	-	NA20529,NA20518,NA18873,HG00101,HG00342,NA07347	6	1	0	1
	1	6522089	AtoG	-	HG00321,HG00235,NA20799,NA11830,NA18486,NA06984,NA12763,NA20509,HG01334,NA19223,NA20541,HG00259,NA12718,NA12749,HG00276,HG00158,HG00139,NA07048,HG00125,HG00315,NA19210,HG00383,NA12340,NA18910,HG00284,NA20772,NA19198,NA12761,NA20529,HG00260,NA20515,NA19095,NA18499,HG00112,HG00131,NA18489,NA20543,NA11843,NA19108,HG00253,NA12815,NA12144,NA20508,NA19184,NA12814,NA07347,NA12830,NA20534,HG00189,HG00105…	148	1	1	1
	1	6522101	AtoG	-	HG00122,NA20506,NA19184,NA18910,HG00383,NA19210,HG00315,HG00125,NA12760,NA20508,NA12275,NA12751,HG00263,HG00325,NA20785,NA11931,NA20772,HG00099,HG00284,HG00239,NA12400,NA12413,NA12489,HG00148,HG00309,NA20771,NA11843,NA20813,HG00313,NA20765,NA12546,NA12286,NA20534,HG00120,NA12815,HG00119,HG00253,NA19214,HG00356,NA12716,NA11994,HG00274,HG00233,NA19114,NA20812,NA20810,HG00111,NA20532,NA06986,HG00251…	134	1	1	1
	1	6522102	AtoG	-	NA12717,HG00150,NA20766,NA12286,NA12546,HG00239,NA20772,NA18910,HG00315,NA20771,HG00251,NA12889,NA20512,HG00342,NA19222,HG00143,NA20543,NA06984,HG00234,NA20803,HG00128,HG00121,NA20507,NA12873	24	1	0	1
	1	6522124	AtoG	-	NA20515,HG01334,NA19257	3	1	0	1
	1	6522132	AtoG	-	HG00128,HG00137,NA12383,NA12340	4	0	0	0
	1	6522161	AtoG	-	NA12347,HG00251,HG00378,NA18923,HG00349,NA19129,NA12286,NA12546,NA12874,NA20765,NA20525,HG00189,NA20800,NA12383,NA18916,NA20504,NA20771,NA10851,NA12873,HG00119,NA18910,HG00122,NA20772,HG00137,HG00284,HG00099,HG00239,HG00365,NA12400,HG00233,NA12413,HG00338,NA11831,NA12489,HG00309,NA20813,HG00148,NA18873,NA11843,HG00108,HG00150,HG00138,HG00120,NA12717,NA20527,HG00259,NA12718,HG00276,HG00274,NA12749…	162	1	1	1
	1	6522178	AtoG	-	HG00187,HG00121,NA19214,NA18867,NA20543,NA12340,NA11831,HG00376,NA12717,NA11931	10	1	0	1
	1	6522181	AtoG	-	HG00263,HG00112,HG00378,HG00131,HG00309,NA18867,NA20773,HG00185,NA19118,NA11881,NA12814,NA19200,NA20800,NA11831,HG00138,NA20785,HG00108,HG00233,NA20828	19	1	1	1
	1	6522199	AtoG	-	HG00252,NA19114	2	1	1	1
	1	6522284	AtoG	-	HG00378,NA20828,NA20771	3	0	0	0
	1	6522285	AtoG	-	NA20785,NA10851,NA11994,NA19114,HG00119,NA12718,NA12874,NA20771,HG00250,HG00378,HG00138,NA12234,NA20803,HG00105,HG00353,NA12777,NA20828,NA20505,NA12889,NA18917,NA20582,NA18870,NA12750,HG00097,NA19153,HG02215,NA18923,NA12400,HG00099,NA12716,HG00159,NA20786,HG00243,HG00150,HG00123,NA12760,HG00336,NA11831,NA12814,HG00183,NA12341	41	1	1	1
	1	6522287	AtoG	-	NA20828,NA12043,NA20772,NA20543,NA11994,NA11831,NA20771,HG00122,NA12776,HG00353,HG00119,NA12716,NA11931,HG00105,HG00150,NA20761,NA12814,HG00328,NA19131,NA19129,HG00371,NA20800,NA18870,NA12341,NA18907,NA18917,NA19153,NA10847,NA11829,NA20541,HG00096,NA12750,HG00139,HG00097,HG00378,HG00250,NA20512,NA10851,HG00313,NA12287,HG00336,NA12777,NA18502,NA19114,HG00243,HG00099	46	1	0	1
	1	6522291	AtoG	-	NA20785,HG00150	2	0	0	0
	1	6522293	AtoG	-	NA12776,NA11843,HG00097,HG00233,NA12282,NA18907,NA20786,NA20512,HG00139,NA19119,NA06986,NA20785,NA12287,NA12777,HG00313,NA19114,NA12760,HG00365,NA12400,NA19200,NA20828,NA12043,HG00239,NA19131,HG00105,NA10847,NA20803,HG00099,NA20519,HG00378,NA20541,HG00252,NA19129,NA20800,NA18923,NA12347,NA12763,NA20505,NA06984,NA12889,HG00234,NA19116,NA20525,NA18917,NA19153,NA19223,HG00262,NA12750,NA20765,HG00108…	101	1	1	1
	1	6522306	AtoG	-	NA10851,HG00239,HG00108,NA12340,NA20765,NA19116,NA06985	7	1	0	1
	1	6522338	AtoG	-	HG00183,HG00139,NA20828,NA12282,NA20797,NA20814,HG00353,NA20519,HG00099	9	1	0	1
	1	6522339	AtoG	-	NA20786,HG00328,HG00353,NA19114,NA20512,NA10851,HG00262,NA19130,NA18923,NA12347,NA12763,HG02215,NA06984,NA20797,NA12286	15	1	0	1
	1	6522365	AtoG	-	NA19223,HG00371,NA12043,NA12874,NA19200,NA20790,NA12763,HG02215,HG00122,NA12400,NA12760,NA19114,HG00138,NA11831,NA12347,HG00234,HG00123,NA20527,HG00183,HG01334,NA20772,NA20814,NA20519,NA20515,NA12776,HG00158,NA06984,HG00119,NA20800,HG00099,NA12718,NA11931,NA20525,NA06985,NA20761,NA20828,NA19131,NA19130,NA12716,HG00262,HG00239,HG00159,HG00315,HG00097,HG00149,NA18502,NA12341,NA10847,HG00353,HG00096…	87	1	1	1
	1	6522370	AtoG	-	NA11843,NA11832,NA18910,HG00108,NA12234,NA20515,HG00234,HG00378,NA12341,HG00315,NA20765	11	1	1	1
	1	6522384	AtoG	-	NA20527,NA20803,NA11831,HG01334,NA11829,NA18910,NA19114,NA12340,HG00131,NA19204,NA11843,NA19223,HG00250,NA12842,HG00365,HG00328,NA20761,NA20505,HG00159	19	1	0	1
	1	6522387	AtoG	-	NA19116,HG00149,NA10851,HG00252,HG02215,NA20812,NA20803,NA20512,HG00328,NA18910,HG00108,HG00345,NA11829,HG00158,HG00239,NA12287,NA19222,NA19129,NA11832,HG00119,NA19119,HG00378,HG00234,NA12874,NA12842	25	1	0	1
	1	6522401	AtoG	-	NA12874,NA20761,NA12287,HG00108,NA20772,NA20790	6	1	0	1
	1	6522402	AtoG	-	NA18502,NA12286,NA19114,NA20807,HG00378,NA19222	6	1	0	1
	1	6522410	AtoG	-	NA18502,NA20807,HG00108,NA19129	4	1	0	1
	1	6522463	AtoG	-	NA19223,NA20812	2	1	0	1
	1	6522467	AtoG	-	HG00149,NA19200,NA11831,NA20512,NA06986,NA20765,NA19204,HG00328,HG00313,NA12234,NA20772,NA19223,NA12286	13	1	0	1
	1	6522498	AtoG	-	NA20765,NA20812,NA19222,NA19095,NA20512,NA18502,NA20761,NA19204,NA12234,NA19114,HG00328,NA20807,NA19129,NA06986,NA12874,NA11831,NA20772,NA19200,NA12286,HG00378	20	1	1	1
	1	6522808	AtoG	-	NA12275,NA11894	2	1	1	1
	1	6522871	AtoG	-	HG00378,NA11894,HG00138,HG00133,NA20527,HG00313	6	0	0	0
	1	6522878	AtoG	-	NA12275,NA20527,NA11894,HG00137	4	1	0	1
	1	6522941	AtoG	-	NA07347,HG00338,HG00309,HG00378,NA12778,NA12889,HG00137,NA18916,HG00336,HG00114,NA20803,NA20519,NA12341,NA12716,NA20766,NA20757,HG00133,HG00356,HG00187,NA12400,HG00138,NA20527,NA07000,NA12275,HG00281,NA12413,HG00320,HG00349,NA12750	29	1	0	1
	1	6522949	AtoG	-	NA11829,HG00338,HG00097	3	1	0	1
	1	6522976	AtoG	-	NA20519,NA12400,HG00356,HG01334,NA12775,HG00328,HG00114,NA12843,HG00137,NA20766,NA12155,HG00138,HG00262,NA12234,NA11840,NA12873,NA20518,HG00117,NA12275,NA18916,NA20524,NA12815,NA20802,HG00315,NA19107,NA20828,NA12283,NA12043,NA12006,HG00097,NA11831,NA11829,NA12763,NA12716,NA12760,HG00271,HG00281,HG00309,NA12413,NA20752,HG00336,NA20527,NA20771,HG00101,NA12383,NA07000,HG00234,NA19098,NA20801,HG00378…	75	1	1	1
	1	6522995	AtoG	-	NA12889,HG00262,NA19190,NA20828,NA20766,NA19098,HG00349,NA11829,HG00330,NA19107,NA20524,NA11830,NA12045,NA12043,HG00375,NA12778,NA12006,HG00097,NA11894,NA12763,NA12872,NA20752	22	1	0	1
	1	6522998	AtoG	-	NA12815,HG00101,NA20524,NA12275,NA12872,NA12234,HG00271	7	1	0	1
	1	6523006	AtoG	-	NA20826,NA12760,NA12716,NA20802,NA12413,NA12275,NA11894,NA12043,NA19107,HG00101,HG00137,NA07000,NA20803,NA12341,NA11829,NA12400,NA20828,NA12006	18	1	0	1
	1	6523012	AtoG	-	NA20802,NA20828,NA19149,NA12043,NA12760,HG00375,NA12872,NA20524,HG00281,NA20797,NA11894,NA12815,HG00315,HG00262,NA07347,HG00234,NA20826,NA20518,NA11832,NA12750,NA12006,HG00133,NA12234	23	1	0	1
	1	6523013	AtoG	-	NA11995,HG00309	2	1	0	1
	1	6523037	AtoG	-	HG00187,HG00309,HG00276,NA07000,HG00271,HG00281,HG00356,HG00234,NA12872,NA11894	10	1	0	1
	1	6523039	AtoG	-	HG00378,NA20801,NA19149,HG00252,HG00262,NA12283,HG01334,NA19147,HG00234,NA11840,NA11832,NA12383,NA12749,NA07347,NA20757,NA20797,NA20756,NA12763,NA12249,HG00131,HG00356,HG00328,HG00114,NA20766,HG00246,NA12778,HG00349,NA12843,HG00097,HG00338,HG00117,HG00320,NA20802,NA11893,NA20541	35	1	0	1
	1	6523049	AtoG	-	NA12283,HG00272,NA11829,NA12750,NA20519,HG00114,NA12778,NA12489,HG00281,NA11995,HG00338,NA11893,NA12413,NA11894,NA12872,HG00138,NA12155,NA18916,NA19147,NA12234,NA12249,HG00187,HG00145,NA20527,HG00097	25	1	0	1
	1	6523052	AtoG	-	HG00252,HG00183,NA12815,NA18517,NA20757,HG00320,HG00158,HG00138,NA12778,NA12775,NA20801,NA12283,NA20504,NA12889,NA11995,NA20802,NA11831,HG00324,NA20771,NA12144	20	1	0	1
	1	6523053	AtoG	-	NA12716,NA11830,NA11893,HG00375,NA11995,NA12144,NA12889,HG00187,HG00281,HG00131,NA12872,HG00138,HG00133,HG00309,HG00246,NA07000,HG00097,NA12383,NA12283,HG00276,HG00328,NA12873,NA12815,HG00336,NA12045,NA20756,NA12413,NA20504,NA11829,HG00272,NA12043,NA12775,NA12155,HG00145,NA18916,HG00349,NA11894	37	1	0	1
	1	6523061	AtoG	-	NA12749,HG00349,NA20752,NA11893	4	1	0	1
	1	6523078	AtoG	-	HG00234,NA19147,NA20797,HG00183,NA20771,NA11893,NA12413,NA20803,NA20756,NA19098,HG00328,NA12749,NA12889,HG00281,NA20828,NA19190,HG00158,HG00097,NA20801,NA12716,NA11995,NA12249,NA12155,NA12275,HG00330,NA20504,NA12815,HG00246,NA18916,NA12843,NA12778,NA12045,HG00114,NA12234,NA11840,NA11829,NA12872,HG00331,NA18508,NA20527,NA11831,HG00187,HG00138,NA07347,NA12383,NA12763,NA18517,HG00133,NA07048,HG00349…	83	1	0	1
	1	6523079	AtoG	-	HG00183,HG00235,NA20766,NA20502,NA12155,NA12872	6	1	0	1
	1	6523102	AtoG	-	NA20801,NA18508,HG00117,HG00187,HG00138,NA12156,HG00345,NA12750,HG00133,HG00183,NA12778,NA11894,NA12763,NA11829,NA19147,HG00338,NA12749,NA12873,NA20756,NA20519,HG00235,NA20541,NA12775,NA12234,NA20518,HG00101,NA20802,HG00137,HG00114,HG00271,NA20766,NA12413,HG00324,HG00309,NA18916,NA12489,HG00262,NA20771,HG00328,NA12045,NA12889,NA12341,NA12400,NA19190,NA12275,HG01334,NA20502,NA12043	48	1	0	1
	1	6523140	AtoG	-	NA12889,NA11832,HG00345,HG00117,HG00187,NA20518,NA11830,HG00331,NA18508,NA12043,HG01334,NA20757,NA20766,NA12156,NA20756,NA11831,HG00309,NA12413,HG00328,HG00281,HG00137,HG00133,HG00324,HG00158,NA12778,HG00276,NA12775,NA20541,NA12763,HG00338,NA20802,HG00114,NA11894,NA20771,HG00097	35	1	0	1
	1	6523156	AtoG	-	NA07048,NA11832,HG00309,HG00345,NA07347,HG00138,HG00187,NA11893,HG00097,NA20756,NA12775,NA12234,HG00281,NA12872,NA20527,NA20541,NA12156,HG00234,HG00101,NA20828,NA20757,HG00158,NA19098,NA12873,NA12760,NA12400,NA12249,NA20519,NA18916,NA18517,NA20771,HG00262,HG00133,NA20803,HG00331,HG00328	36	1	0	1
	1	6523160	AtoG	-	NA07048,NA12413	2	1	0	1
	1	6523305	AtoG	-	NA11832,NA20800	2	0	0	1
	1	6523317	AtoG	-	HG00234,NA12286,HG00246,NA07347	4	1	0	1
	1	6523321	AtoG	-	HG00139,HG00099,NA07037,NA12718,HG00338,HG00324,NA20771,NA19108,NA20795,HG00121,NA11840	11	1	0	1
	1	6523323	AtoG	-	NA20771,HG00235,NA18916,NA19130,NA20589,HG00180,NA19256,NA12717,NA19225,NA12546,NA20581,NA19149,HG00325,NA19204,NA19119,NA11992,NA11843,HG00353,NA12341,HG00117,NA12272,NA20534,NA07048,HG00246,NA18912,NA19248,NA19207,NA12814,HG00119,NA11832,NA11994,NA20543,HG00106,NA20769,NA20773,NA11894,NA12750,HG00179,HG00356,HG00365,NA11893,NA20756,NA20527,HG00116,NA12413,NA12156,HG00259,NA19098,HG00158,HG00141…	155	1	1	1
	1	6523335	AtoG	-	NA12043,NA20581,HG00272,HG00180,NA19236,NA18909,NA12890,HG00262,NA20811,HG00138,NA19137,NA11930,NA18505,HG00361,NA19198,HG00250,HG00183,HG00179,NA19256,NA12004,NA11894,NA07000,NA12156,HG00356,NA20771,NA19152,HG00235,NA18923,HG00128,NA20589,NA20757,HG00141,NA11831,HG00244,HG00365,HG01334,NA12777,HG00101,NA19144,NA12815,NA19210,NA20797,HG00309,HG00187,HG00383,NA12144,NA07347,NA20795,NA18910,NA12489…	140	1	0	1
	1	6523336	AtoG	-	NA12043,NA12489,NA12341,NA12873,NA20795,NA18912,NA11893,HG00158,NA20507,HG00234,HG00262,HG00108,NA20543,HG00361,NA19225,NA12286,NA19096,NA07000,NA19118,HG00383,NA19210,HG00235,NA12275,NA19098	24	1	0	1
	1	6523358	AtoG	-	NA11843,NA12750,HG00315,HG00383,HG00097,HG00143,NA20801,HG00106,NA20519,HG00258,HG00325	11	1	0	1
	1	6523397	AtoG	-	NA18486,HG00365,NA11831,HG00105,NA19114,HG00138,NA19096,NA19118,HG00133,NA12144,HG00251,HG00349,HG00378,HG00111,NA12341,NA20786,HG00099,NA19092,NA20505,NA19107,HG00187,NA18858,NA12777,NA20800,NA20771,NA19225,NA11931,HG00101,NA12716,HG00262,HG00235,NA19171,NA12717,NA18916,NA19130,NA12489,NA20795,NA12546,HG00239,NA20589,NA07056,NA12814,NA20757,NA12286,HG00159,NA19116,NA12156,HG00376,NA12282,NA07347…	171	1	1	1
	1	6523409	AtoG	-	NA20771,NA20543,NA20525,NA20828,HG00328,NA12776,HG01334,NA20803,NA12716,HG00097,HG00158,NA07347,NA12873,NA18858	14	1	0	1
	1	6523414	AtoG	-	HG00158,NA12718,NA20765,NA12830,HG00116,HG00128,NA19119,HG00321,NA20525,NA12341,NA18907,NA12287,NA18934,NA19149,NA18912,NA19107,NA20527,HG00159,HG00338,NA12814,NA12872,HG00105,NA20507,HG01334,NA19204,HG00180,NA12489,HG00349,NA18916,HG00187,NA19092,HG00117,HG00383,NA12286,NA20800,NA11881,HG00272,NA20534,NA06986,NA20532,HG00101,NA12399,NA20795,NA20758,NA11994,NA19116,NA12004,NA19236,NA20811,HG00179…	65	1	0	1
	1	6523417	AtoG	-	HG00139,NA12287,NA20799,HG00250,NA12815,NA20801,HG00315,NA19131,NA18912,NA12776,NA12144,HG00235,HG00325,NA20828,HG00183,NA07051,NA12341,NA12234,NA19225,NA20532,NA12890,NA20771,HG00309,NA20795,NA12814,HG00259,HG00361,NA12760,NA19118,HG01334,NA11930,NA20507,NA12272,NA11931,HG00365,NA19116,NA19144,NA07347,HG00180,HG00383,HG00371,NA19092,NA19214,HG00130,NA20800,HG00349,NA19248,NA12400,NA12889,NA12873…	62	1	0	1
	1	6523423	AtoG	-	NA19096,HG00105	2	0	0	0
	1	6523455	AtoG	-	NA20541,NA20771,HG00315,NA12282,NA19137,HG00139,HG00369,NA12815,NA12043,NA12777,NA20769,NA20803,NA19213,NA19143,HG00325,HG00375,NA12829,NA19204,NA20828,NA12775,HG00138,NA20507,NA11930,HG00262,HG00239,NA11894,HG00365,HG00141,NA20800,NA19121,NA18933,NA12399,HG00383,NA07000,HG00158,HG00309,NA07051,NA19114,HG00356,HG00159,NA20765,HG00251,NA19116,HG00180,HG00105,NA12763,HG00097,NA19118,NA19207,NA20581…	70	1	0	1
	1	6523457	AtoG	-	NA12814,NA18909,NA19143,NA19107,HG00097,NA19152,HG00187,HG00272,NA20586,NA19129,NA11931,NA20527,NA20758,NA07000,NA07347,NA19225,NA11893,NA11995,NA20541,NA12775,NA12777,HG00119,NA19207,NA12400,HG00096,NA20581,HG00271,HG00131,NA12399,NA19092,NA12286,HG00321,HG00138,HG00183,HG00105	35	1	0	1
	1	6523467	AtoG	-	NA20786,NA20765,HG00251,NA12763,HG00128,NA11829,HG00099,NA18909,NA19107,HG00187,NA20802,HG00328,NA18517,HG00244,HG00371,NA18910,HG00096,NA12830,NA18934,NA19119,NA07051,NA18923,NA11992,NA19116,NA07037,NA20756,NA12872,HG00139,NA20527,NA12275,HG00258,NA12413,HG00361,HG00375,NA12286,HG00157,HG00234,HG00383,HG00369,HG00158,NA20541,HG00138,NA20534,HG00262,NA19108,HG00143,HG00365,NA19121,NA20507,HG00239…	136	1	1	1
	1	6523479	AtoG	-	NA12777,HG00325,NA20799,NA19214,HG00234,NA12830,NA12775,HG00141,HG00365,NA12718,HG00119,NA20758,NA12776,HG00105,HG00262,HG00096,NA19131,HG00376,NA20581,HG00383,NA19204,NA07037,NA20543,NA12286,HG00111,NA12751,NA12814,HG00309,NA19210,HG00375,NA12043,NA18909,NA19171,NA12413,NA12275,NA20802,HG00155,NA19147	38	1	1	1
	1	6523496	AtoG	-	NA06985,HG00121,HG00155,HG00353,NA12777,NA18858,NA12716,NA19213,NA18934,HG00383,NA19256,NA11829,HG00378,NA19144,HG00331,HG00315,NA20786,HG01334,NA11994,NA19130,NA20541,NA19137,NA19214,NA18923,NA12814,NA11931,NA11992,NA20543,HG00138,NA12283,NA07000,HG00158,NA19171,HG00361,NA20754,NA19223,NA20795,HG00325,NA11995,NA20505,NA18912,HG00141,NA19118,NA20803,NA20507,NA11894,NA12043,HG00117,NA12815,NA12275…	82	1	0	1
	1	6523522	AtoG	-	NA19223,NA19137,NA20541,NA20786,NA12775,HG00353,NA12716	7	0	0	1
	1	6523532	AtoG	-	NA12814,NA20765,NA12815,NA11992,NA18502,NA20786,HG00353,NA11829,NA20507,NA20795,NA12249,HG00096,NA19118,NA12043	14	1	1	1
	1	6523533	AtoG	-	NA12249,HG00131,NA19118,NA18912,HG00361,NA20799,NA20505,NA11994,NA19144,NA12814,NA18923,HG00133,NA20765,HG00096,NA20527,NA12489,NA20507,NA20754,HG00353,NA12283,NA12716,NA19143,NA20786,NA18517,HG00108,HG00117,NA19248,NA11894,NA19210,NA11893,NA12775,HG00158,NA18502,HG00159,HG01334,HG00143,NA11992,NA20802,NA19121,HG00383,NA19223,NA19096,HG00099,NA12043,NA19107,NA19147,NA19131,NA20541,NA19213,HG00325…	60	1	1	1
	1	6524768	AtoG	-	NA06986,HG00117,NA20527,NA19152,NA11831,NA12814,NA12249	7	1	0	1
	1	6524769	AtoG	-	NA12249,NA11831,NA19152,NA06986,NA20527,NA12716,HG00360,NA12889,HG00117,NA12814,NA12829	11	1	0	1
	1	6524774	AtoG	-	HG00360,NA12814,NA11831,NA19152,NA06986,NA12889,NA12716,NA12829,NA12249	9	1	0	1
	1	6524775	AtoG	-	NA12889,NA12249,HG00360	3	1	0	1
	1	6524807	AtoG	-	HG00378,HG00117,NA12716	3	1	0	1
	1	6525011	AtoG	-	NA19118,NA19095	2	1	1	1
	1	6525012	AtoG	-	NA19118,NA19095	2	1	1	1
	1	6525028	AtoG	-	NA19095,NA19118	2	1	1	1
	1	6525151	AtoG	-	NA11831,NA12283	2	1	0	1
	1	6525168	AtoG	-	HG00306,NA20802,NA20783,NA20519,HG00381,NA19197,NA18520,HG00114,NA12340,NA12399,NA12716,NA18910,HG00234,NA19225,NA11994,NA12006,HG00155,NA18916,NA19130,HG00378,NA19209,NA07048,NA20804,NA12154,NA12283,NA19204,NA20589,NA20806,NA12156,NA19171,HG00284,HG00349,NA12155,NA20809,NA12814,HG00102,NA19210,NA12842,NA12829,NA19190,NA19152,NA12749,NA11893,HG00239,NA07056,HG00365,NA11881,NA11894,NA20534,NA12777…	133	1	0	1
	1	6525175	AtoG	-	HG00378,NA12546,HG00309,HG00242,NA07037,NA12761,HG02215,NA20761,NA19198,HG01334,NA20505,HG00315,HG00102,NA12347,NA12249,NA12812,NA20803,NA07051,NA12399,NA19213,HG00185,NA12749,NA12283,NA18933,NA20508	25	1	0	1
	1	6525249	AtoG	-	HG00187,NA11831,NA11931,NA20806	4	1	0	1
	1	6525271	AtoG	-	NA12890,NA12413,NA12815,NA12399,HG00099,NA12249,NA11831,HG00187,NA11931,HG00117,NA20761,NA20803,NA20505,NA12283,HG00343,NA12045,HG00233,HG00309,HG00313,NA19223,NA12749	21	1	1	1
	1	6525272	AtoG	-	NA12156,NA12347,HG00149,NA19116,NA12830,HG00250,HG00330,NA12890,HG00142,NA20826,NA12249,NA12842,HG00119,NA11994,HG00336,HG00096,NA19184,NA06984,NA19130,NA20509,NA20513,NA18916,NA19197,HG00128,HG00114,HG00355,HG00338,HG00131,NA19257,HG00349,HG00326,NA12812,NA19210,HG00112,NA20800,HG00325,HG00138,NA12234,NA20796,NA12775,NA12004,HG00185,HG00280,NA19129,NA20792,HG00258,NA18917,NA20540,NA12776,HG00117…	217	1	0	1
	1	6525278	AtoG	-	NA12413,NA12399,HG00099,HG00343,HG00233,HG00117,NA19223,NA12815	8	1	0	1
	1	6582860	AtoG	+	NA19206,NA19095,HG00355,NA20513,HG00119,NA19121,HG00245	7	1	1	1
	1	6584113	AtoG	+	NA12829,NA19256,HG00117,HG00259	4	1	0	1
	1	6584118	AtoG	+	HG00117,NA20527,NA18498,NA19256,NA12829,HG00234	6	1	1	1
	1	6632109	AtoG	+	HG00117,NA20527,NA06986	3	1	0	1
	1	6635184	AtoG	+	NA19206,NA19131	2	0	0	0
	1	6646911	AtoG	-	NA19131,NA12272,NA12761,HG00343,NA18870,HG00365,HG00183,NA06986,NA19121,NA18934,HG00117,NA20528,HG00236,HG00277,NA19095,NA20534,NA19143,NA20588,HG00234	19	1	1	1
	1	6646912	AtoG	-	NA20528,HG00237,HG00325,HG00277,HG00236,NA19131,HG00234,HG00365,NA19095,NA12750,HG00117,NA12272,NA19121	13	1	1	1
	1	6646913	AtoG	-	HG00237,HG00343,NA19131,NA12750,HG00365,HG00277	6	1	0	1
	1	6646921	AtoG	-	HG00183,NA20528,NA06986,HG00236,NA19121,NA20534,NA19131,NA18934,NA12272,HG00117,NA19095,HG00277,HG00234,HG00343,HG00365	15	1	1	1
	1	6646934	AtoG	-	HG00117,NA20534,HG00237,HG00277,NA12761	5	1	1	1
	1	6646963	AtoG	-	NA20588,NA12761,HG00117,NA06986,NA12750,NA19095,NA18498,HG00183,HG00365,NA19131,HG00234,NA20534	12	1	1	1
	1	6646972	AtoG	-	HG00234,HG00365,HG00183,HG00117,NA20588	5	1	1	1
	1	6646988	AtoG	-	HG00183,NA19095	2	1	0	1
	1	6646990	AtoG	-	HG00234,NA19143,NA12761,HG00117,HG00183	5	1	1	1
	1	6647008	AtoG	-	NA19131,NA06986,NA12750,NA19095,HG00325,HG00157,NA20519,NA18498,NA18511,NA12761,HG00183,NA19143	12	1	0	1
	1	6647009	AtoG	-	HG00157,NA20534,NA19121,NA12750,NA12761,NA19143,HG00325,NA18934,HG00117,NA18870,NA18498,HG00183,NA06986,NA18511,NA19095,HG00234	16	1	1	1
	1	6647034	AtoG	-	NA18498,NA18934,HG00183,NA20519,HG00325,NA19143,NA18870,HG00234,HG00157,NA19095,NA12761,NA18511,HG00117,NA06986	14	1	0	1
	1	6647039	AtoG	-	HG00325,NA18870,NA20519,HG00234,NA19095,HG00117,NA18511,NA18498,NA06986,HG00157,NA19121	11	1	1	1
	1	6647174	AtoG	-	NA19223,NA06986,HG00119,HG00117	4	1	1	1
	1	6647210	AtoG	-	NA19223,HG00119,HG00117	3	1	1	1
	1	6647220	AtoG	-	HG00117,HG00119,NA19223,HG00137	4	1	1	1
	1	6647245	AtoG	-	NA20588,NA06986,HG00119,NA19223,HG00117,NA19213,HG00137	7	1	1	1
	1	6647246	AtoG	-	NA20588,NA06986,HG00119,HG00137,NA19213,HG00117,NA19223	7	1	1	1
	1	6647276	AtoG	-	NA19213,HG00119,NA20588	3	0	0	1
	1	6647355	AtoG	-	NA19108,NA06986	2	1	1	1
	1	6647358	AtoG	-	NA19108,NA06986,HG00117	3	1	1	1
	1	6648428	AtoG	-	HG00183,HG00355,NA19095	3	1	1	1
	1	6648499	AtoG	-	NA19095,HG00183,HG00355,NA19131	4	1	1	1
	1	6648549	AtoG	-	HG00236,HG00183	2	0	0	0
	1	6648595	AtoG	-	NA19095,HG00321	2	1	1	1
	1	6648608	AtoG	-	HG00117,HG00355,NA20513,HG00234,NA19095,NA19131,HG00321,NA19108,NA20527,HG00365,HG00238,NA20765,HG00183,NA06986,NA19146,NA12751,HG00373,NA19159,HG00142	19	1	1	1
	1	6648620	AtoG	-	NA20513,NA19131,HG00183,NA19223,NA18486,HG00321,NA19095,NA19146,HG00234,HG00142	10	1	1	1
	1	6648621	AtoG	-	NA20513,NA19223,NA19146,NA19095,NA18486,HG00234,HG00321,NA19131,HG00183	9	1	1	1
	1	6648639	AtoG	-	HG00321,HG00325	2	1	0	1
	1	6648660	AtoG	-	NA19223,NA18511	2	1	1	1
	1	6648665	AtoG	-	NA18511,NA19095,NA19223,HG00325,NA19131,HG00234,NA18486,NA19146,NA18934,HG00236	10	1	1	1
	1	6648715	AtoG	-	HG00382,NA19107,NA06986,HG00325,NA19197,NA19131,NA18916,NA20509,NA19159,NA20532,NA12763,NA19108,NA19172,NA20527,NA12872,NA18511,NA19095,HG00321,NA12814,HG00255,NA11930,NA19143,HG00238,NA19247,HG00117,HG00376,NA19223,NA19146,NA18934,HG00234,NA18498,NA20534,NA20796,NA18486,NA20765,HG00365,NA12761,HG00355,NA12751,HG00259,HG01791	41	1	1	1
	1	6649035	AtoG	-	NA12750,NA19095,NA19141,NA18486,NA06986,HG00355,NA19256	7	1	1	1
	1	6649065	AtoG	-	NA19223,NA19095,HG00234	3	1	0	1
	1	6649068	AtoG	-	HG00325,NA19141,NA06986,HG00234,HG00355,NA19095,NA19223	7	1	1	1
	1	6649109	AtoG	-	HG00234,HG00325,NA19223,NA12750,HG00355,NA19095,HG00309,NA06986	8	1	1	1
	1	6649130	AtoG	-	NA06986,HG00325,HG00355,NA19141,NA19256,HG00309,NA19118,NA18486,NA19095	9	1	1	1
	1	6649137	AtoG	-	HG00325,NA18486,HG00309,NA19256,NA19095,NA19141,NA06986,HG00355,NA19118	9	1	1	1
	1	6649308	AtoG	-	NA20527,NA19095	2	1	1	1
	1	6649346	AtoG	-	NA19095,NA20527	2	1	0	1
	1	6649433	AtoG	-	NA20527,NA19095	2	0	0	1
	1	6649441	AtoG	-	NA19095,NA19131	2	1	1	1
	1	6649770	AtoG	-	NA18934,NA19223,HG00119	3	1	1	1
	1	6649783	AtoG	-	NA18934,NA18486,NA19223	3	1	1	1
	1	6649804	AtoG	-	NA19223,NA18486	2	1	1	1
	1	6649840	AtoG	-	NA18486,HG00119,HG00142	3	1	0	1
	1	6649846	AtoG	-	NA18486,HG00119	2	1	1	1
	1	6649868	AtoG	-	HG00309,HG00119	2	1	0	1
	1	6649872	AtoG	-	HG00119,HG00309,HG00142	3	1	1	1
	1	6650119	AtoG	-	HG00355,NA20588	2	1	0	1
	1	6650144	AtoG	-	NA20765,NA20588,HG00234,NA20527,HG00355	5	1	1	1
	1	6650152	AtoG	-	NA20527,NA06986,HG00355,NA20765,NA20588	5	1	1	1
	1	6650154	AtoG	-	HG00234,NA20588,NA18934,NA20527,NA20765	5	1	1	1
	1	6650164	AtoG	-	NA20527,NA06986	2	1	0	1
	1	6650187	AtoG	-	NA12058,HG00119,NA19095,NA19108,NA18870,NA18934	6	1	1	1
	1	6650206	AtoG	-	NA20527,NA20765,HG00234	3	1	0	1
	1	6650216	AtoG	-	HG00309,HG00119,NA20513,HG00234,NA19108,NA19141,NA06986	7	1	0	1
	1	6650217	AtoG	-	HG00355,HG00119,NA20765,NA18934,NA06986,HG00234,NA20527	7	1	1	1
	1	6650241	AtoG	-	HG00355,NA18934	2	1	0	1
	1	6650306	AtoG	-	HG00234,HG00119,NA06986,NA20527	4	1	0	1
	1	6650309	AtoG	-	HG00119,NA18916,HG00372,NA19108,NA06986,HG00355,HG00234	7	1	1	1
	1	6650318	AtoG	-	NA20527,NA18934,HG00355,NA20765,NA20513,NA12156,HG00372,NA06986,NA18486,HG00119,HG00234,NA18916	12	1	1	1
	1	6650321	AtoG	-	NA19107,NA20513,NA06986,HG00355,NA20527,NA18916,NA18486,HG00234,HG00372,NA19108	10	1	1	1
	1	6650322	AtoG	-	HG00372,NA06986,NA20527,NA20765,NA19107,NA18486,HG00234,HG00119,NA12156,NA19108,HG00355,NA18916	12	1	1	1
	1	6650323	AtoG	-	HG00119,NA12156,NA19107,HG00372,NA20527,NA18916	6	1	1	1
	1	6650348	AtoG	-	HG00365,NA20513,NA06986,NA18916	4	1	0	1
	1	6650363	AtoG	-	HG00355,NA18916,NA06986,HG00365	4	1	1	1
	1	6650400	AtoG	-	HG00355,NA06986,HG00234,NA20527,NA18511	5	1	1	1
	1	6650444	AtoG	-	HG00355,NA20527,NA19223	3	1	1	1
	1	6650450	AtoG	-	HG00355,HG00234,HG00365,NA20527,NA19223	5	1	1	1
	1	6650466	AtoG	-	HG00355,HG00234,NA06986,NA19256,HG00365,NA20796,NA19223,NA20527	8	1	1	1
	1	6650480	AtoG	-	NA18511,HG00355	2	1	0	1
	1	6650483	AtoG	-	NA18486,NA20527,HG00234,HG00355,NA20513,NA20796,HG00259,NA19223,NA06986	9	1	1	1
	1	6650514	AtoG	-	NA18934,NA19256,HG00234,NA18486,NA19118,HG00355,NA18511,NA19131,NA20513,NA20796,HG00259,NA20527,NA19223	13	1	1	1
	1	6650525	AtoG	-	NA18934,NA19256,NA18486,HG00355,NA19223,NA19131,NA20527,NA19118,HG00259,NA20513	10	1	1	1
	1	6650527	AtoG	-	HG00355,NA19256,NA20527	3	1	1	1
	1	6650535	AtoG	-	NA18486,NA20513,NA18934,NA18511,NA19118,NA19256,NA20527,HG00355,HG00259	9	1	1	1
	1	6650566	AtoG	-	HG00355,NA18486,NA20527	3	1	0	1
	1	7916990	AtoG	-	HG00117,NA20527	2	1	1	1
	1	7917026	AtoG	-	NA12842,NA20527	2	1	0	1
	1	7917067	AtoG	-	NA12842,HG00117,NA20527,NA11894,HG00378,HG00355	6	1	1	1
	1	7917068	AtoG	-	HG00355,HG00117	2	1	1	1
	1	7917106	AtoG	-	NA11894,HG00117	2	1	0	1
	1	7917107	AtoG	-	HG00378,NA12842,NA11894,HG00117	4	1	1	1
	1	7917113	AtoG	-	NA18511,HG00117,NA11894,HG00378	4	1	0	1
	1	7917124	AtoG	-	HG00378,NA12842	2	1	0	1
	1	7917158	AtoG	-	HG00355,HG00117,NA18511	3	1	0	1
	1	7917203	AtoG	-	NA19095,HG00342,HG00117,HG00330,HG00105,HG00355,NA12718,NA12842	8	1	1	1
	1	7917204	AtoG	-	HG00342,HG00330,NA20527,NA12718,NA12842,HG00355,HG00105,NA19095,HG00117	9	1	1	1
	1	7917212	AtoG	-	NA12718,NA12842,HG00105,NA20527,HG00330,HG00117,HG00342	7	1	0	1
	1	7917222	AtoG	-	NA18511,HG00117,NA19095	3	1	0	1
	1	7917226	AtoG	-	HG00117,NA12842,NA18511,NA20756	4	1	0	1
	1	7917801	AtoG	-	NA20527,HG00355,NA12716,NA18511,NA12842,HG00117,HG00131,NA19225	8	1	1	1
	1	7917802	AtoG	-	NA18511,HG00131,HG00142,HG00355,NA12716,HG00117	6	1	0	1
	1	7917811	AtoG	-	HG00117,NA12716,NA12842,HG00131,NA19225	5	1	0	1
	1	7917816	AtoG	-	NA12842,NA18511,HG00117,NA12716,HG00355	5	1	0	1
	1	7917828	AtoG	-	NA20527,NA19095,NA12842,NA19225,NA12716,HG00131,HG00117,HG00142,HG00355,NA18511	10	1	1	1
	1	7917829	AtoG	-	NA12716,HG00117,NA19095,HG00131,NA19225,HG00142,NA18511,NA12842,HG00355,NA20527	10	1	1	1
	1	7917834	AtoG	-	NA19095,NA18511,HG00131,NA12842,HG00117,NA12716	6	1	0	1
	1	7917841	AtoG	-	HG00142,NA18511,NA12842,NA20527,HG00117,HG00131,NA12716	7	1	0	1
	1	7917854	AtoG	-	NA20527,NA12842,HG00117,NA18511,HG00131,NA12716	6	1	0	1
	1	7917863	AtoG	-	NA20527,NA18511,HG00355,NA19095,NA12842,HG00117,NA12716,HG00131	8	1	1	1
	1	7917887	AtoG	-	HG00117,NA12716	2	0	0	0
	1	7917892	AtoG	-	NA18511,HG00117	2	1	0	1
	1	7918051	AtoG	-	HG00142,NA19257,HG00325,NA12348,NA19095,NA18916,NA12842,HG01334,HG00378,HG00139,HG00109,NA20756,NA18511,HG00330	14	1	0	1
	1	7918060	AtoG	-	HG00109,NA20756,HG00142,HG01334,NA18511,HG00131	6	0	0	0
	1	7918092	AtoG	-	NA12400,NA12842	2	1	0	1
	1	7918095	AtoG	-	NA18511,NA19257,HG00378,NA12842,NA12751,NA12348,NA19095,HG00246,HG01334,HG00277	10	1	0	1
	1	7918107	AtoG	-	NA18511,HG00109,NA19257,HG00326,HG00246,NA12400,HG00119,NA19096,HG00131,NA18912,HG01334,HG00242	12	1	0	1
	1	7918121	AtoG	-	NA19257,NA18511	2	1	0	1
	1	7918122	AtoG	-	NA19113,NA19096	2	1	0	1
	1	7918140	AtoG	-	NA18912,HG00119,NA19257,NA19096,NA12763,HG00338,NA20582,HG00142,NA19095,HG00325,HG00343,HG00315	12	0	0	0
	1	7918148	AtoG	-	HG00330,HG00315	2	0	0	0
	1	7918163	AtoG	-	NA12045,HG00338,NA12058,HG00355,HG00343	5	1	0	1
	1	7918168	AtoG	-	HG00246,NA12716,HG00117,NA12400,NA20505,HG00133,HG00131,NA20582,NA19131,HG00242,HG00139,HG00378,HG00330,HG00315,NA20786,NA18511,NA20756,NA20519,NA18916,HG00105,NA19095,NA19113,NA12058,HG00355,HG00343,HG00326,HG00313,HG00187,NA11893,NA19257,NA19235,NA18912,HG01334,NA12814,HG00277,NA12842,HG00384	37	1	0	1
	1	7918179	AtoG	-	HG00277,NA18511,NA19141,NA19257,NA11893,HG00142,HG00117,HG00355,HG00139,NA18912,HG00131,HG00343,NA12058,HG00242,NA19235,HG00141,NA12842,NA07037,NA20582,NA18908	20	1	0	1
	1	7918185	AtoG	-	HG00315,NA19256,NA20786,HG00355,NA12814,NA12045,HG00338,HG00325,NA07037,NA12348,NA19235,NA19257,HG00119,NA18908,HG00326,HG00378,NA19141,HG00313,NA11893,NA19113,NA06985,NA20519,NA12044,HG00251,HG00277,NA20757,HG00187,HG00139,NA20505,HG00246,NA19095,HG00142,HG00105,HG00330,NA12058,NA19131,NA18916,NA20756,NA12716,HG00117,NA18511,NA18912,HG00133,HG00141,HG00384,HG00131,NA12842,NA12751,HG01334,NA12400	50	1	1	1
	1	7918189	AtoG	-	NA18908,NA19257,HG00265	3	1	0	1
	1	7918204	AtoG	-	NA12348,HG00131,HG01334,NA12842,HG00142,NA19257,NA12751,HG00378,NA12400,HG00251,HG00355,NA19256,HG00246,HG00117,NA19141,NA12716,HG00242,NA18912,NA12286,NA19095,HG00133,HG00141,HG00326,HG00384,NA20756,HG00139,NA18511	27	1	0	1
	1	7918205	AtoG	-	HG00355,HG00139,NA18511,HG00242,NA18912	5	1	1	1
	1	7918212	AtoG	-	NA18908,NA19095,NA19113,NA18511,HG00251,HG00355,HG00139,HG00325,NA12348,NA12716,NA12751,HG00117,NA18912,HG00142,NA12045,HG00384,HG00338,HG00187,NA07037,HG00326,HG00277,HG00141,NA11893,HG00315,HG00133,HG01334,NA20786,NA12058,NA12044,HG00378,NA20505,NA12763,HG00330,NA20756,NA12814,HG00131,NA12842,NA12286,NA12400,NA18916,HG00105	41	1	1	1
	1	7918213	AtoG	-	HG00133,NA12058,HG01334,HG00105,NA12400,HG00142,HG00330,HG00131,NA12763,NA12842,HG00315,HG00117,NA12716,HG00326,HG00355,NA12044,NA12751,NA12814,NA20786,NA18511	20	1	1	1
	1	7918218	AtoG	-	NA18916,NA12400,NA12763,HG01334,HG00105,HG00355,NA20756,NA18511,HG00315,HG00131,NA07037,NA12814,HG00117,NA20786,HG00142,HG00251,HG00139,NA12286,HG00326,HG00277,NA20505,NA19256,NA12842,HG00384,HG00330,NA18912,HG00141,HG00187,HG00338,NA12716	30	1	1	1
	1	7918250	AtoG	-	HG00355,NA20786,HG00313,HG00325,HG00141,NA12842,HG00131	7	1	0	1
	1	7918253	AtoG	-	NA12400,NA19113,NA19095,HG00141,HG00338,NA12058,NA12716,NA20757,HG01334,NA19131,NA11893,HG00117,HG00277,NA18912,NA12763,HG00142,NA07037,NA12842,NA18511,HG00313,NA20786,HG00131,HG00105,HG00315,NA18908,HG00251,HG00355,NA20519	28	1	1	1
	1	7918258	AtoG	-	HG00338,HG00265,NA18908	3	1	1	1
	1	7918259	AtoG	-	HG00141,HG00117	2	1	0	1
	1	7918265	AtoG	-	NA11893,HG00246,NA12763,NA12842,NA20519,NA12400,NA18912,NA06985	8	0	0	0
	1	7918272	AtoG	-	NA18511,HG00117,HG00131,NA18912,HG00378,HG00251,HG00277,NA07037,NA20757,NA11893,HG00142,HG00355,NA12400,NA06985,HG00141,NA19095,NA12751,NA19113,HG00246,NA18908,HG00338,HG00315,HG00265,NA20519,NA12058,NA20786,HG00133,NA12716,HG00139,HG00105,NA12842	31	1	1	1
	1	7918277	AtoG	-	HG00141,NA19095,NA20519,HG00133,NA19113,NA19131,HG00338,NA20786,NA12751,NA12842,NA18908,HG00251,NA12400,NA20757,NA07037,HG00246,HG00131,NA18511,HG00105,NA12716,NA20756,HG00142,HG00265,HG00139,NA11893,NA12058,HG00378,HG00117,NA18912,HG01334,HG00330,HG00277,NA20505,HG00315,HG00355,NA06985	36	1	1	1
	1	7918281	AtoG	-	HG00139,HG00246,HG00105,NA12400,HG00330,NA12842,HG00355,HG00117,NA18511	9	1	0	1
	1	7918389	AtoG	-	HG00326,NA12751	2	0	0	0
	1	7918417	AtoG	-	HG00117,NA12716	2	1	0	1
	1	7918455	AtoG	-	NA12399,HG00330,HG01334	3	1	0	1
	1	7918464	AtoG	-	HG00097,HG00131,NA20527,HG00326,NA07037,NA12814	6	1	0	1
	1	7918491	AtoG	-	HG00326,HG01334,NA20796,HG00097,HG00105,NA19257,HG00342,NA12751	8	1	0	1
	1	7918495	AtoG	-	NA06985,NA20786,HG00187,HG00326,NA19095	5	1	1	1
	1	7918506	AtoG	-	NA12058,HG00330,HG00143,NA20527,HG00355,NA19118,NA12399,NA20796,HG00097,NA12814,NA18916,HG00378,NA12842,HG00342,NA12348,HG00117,NA20786,NA19257,NA18511,HG00187,NA12716	21	1	0	1
	1	7918531	AtoG	-	HG00131,HG00342,HG00117	3	0	0	0
	1	7918534	AtoG	-	HG00131,NA19095,NA12399,HG00341,HG00117,NA07037,HG00342,HG00315,NA12716,HG00187,NA12348,HG00284,NA11992,NA20527,HG00143,NA12842,HG00378,NA18908	18	1	0	1
	1	7918535	AtoG	-	NA12399,NA18511,HG00117,NA19095,HG00315,NA18908,NA20527,HG00187,HG00341,NA06985,NA11992,NA19118,NA12842,NA20786,NA12716,HG00284	16	1	0	1
	1	7918536	AtoG	-	HG00117,NA18511,HG00355	3	0	0	0
	1	7918537	AtoG	-	HG00342,HG00315,NA19095,NA18511,NA07037,NA12716,NA11992,HG00355,HG00143,HG00117,NA19118,NA12842,NA20786,HG00341,NA12399	15	1	0	1
	1	7918538	AtoG	-	HG00117,NA12716	2	1	0	1
	1	7918542	AtoG	-	HG00117,NA20786	2	1	0	1
	1	7918543	AtoG	-	HG00143,NA18908,HG00378,NA18511,NA19095,NA19113,HG00117,NA12058,HG00246,NA12716,NA12842,NA20527,NA12413	13	1	0	1
	1	7918544	AtoG	-	HG00143,NA18908,HG00246,NA20786,HG00117,NA20527,NA07037,NA12413,NA12842,NA12716	10	1	0	1
	1	7918545	AtoG	-	NA12842,HG00378,HG00341,HG00117,HG00355,HG00143,HG00246,NA12058,HG00284,NA12716,NA18908,NA20527,NA20786,NA07037	14	1	0	1
	1	7918546	AtoG	-	NA12716,HG00117,NA07037,NA12842,NA19095,NA06985	6	1	1	1
	1	7918549	AtoG	-	NA12716,HG00315,NA20527,HG00117,HG00355	5	1	1	1
	1	7918560	AtoG	-	HG00117,NA19113,NA19118	3	0	0	0
	1	7918568	AtoG	-	HG00355,NA19118,HG00341,NA12716	4	1	0	1
	1	7918583	AtoG	-	NA12751,HG00342	2	0	0	0
	1	7918585	AtoG	-	NA19118,NA20527,HG00341,HG00315,NA12399,HG00284,NA12842,NA18916,NA12058,NA07037,HG00246,NA19131,NA12716,HG00131,NA11992,HG00330,HG00158,HG00342,HG00349,HG00105,NA12829,NA12751,NA19095,HG00378,HG00336,HG00117,NA12413,HG00321,HG00355,HG00326,NA20786,HG00325,NA19113,NA12400,NA18511	35	1	1	1
	1	7918594	AtoG	-	NA19235,NA12829,HG00131,NA18511,NA07037,NA12842,HG00342,HG00105,HG00117	9	1	0	1
	1	7918599	AtoG	-	NA07037,HG00179	2	0	0	0
	1	7918609	AtoG	-	HG00246,HG00158,HG00315,HG00131,NA12058,NA18916,HG00105,HG00325,HG00355,HG00336,NA12044,HG00349,NA12400,NA12842,NA19235,HG01334,NA19095,NA12829,NA12751,HG00342,NA19131,HG00117,NA07037,NA12413,NA12716,NA19118,NA18511,HG00321,NA20786,HG00326,NA19113,HG00142,HG00378,NA20527,NA12399,HG00338,HG00119,HG00330	38	1	1	1
	1	7918617	AtoG	-	NA12400,NA07037,NA19095,HG01334,HG00349,HG00342,NA12058,HG00355,NA18511,NA12829,NA12044,NA19235,NA12399,HG00119,HG00315,HG00117,HG00246,HG00139,HG00378,HG00321,NA19190,NA20527,NA19118,NA12718,HG00179,HG00338,HG00105,HG00330,HG00158,NA12413,HG00341,HG00326,NA19113,HG00131,NA20786,HG00142,NA18916,NA19257,HG00325,NA12716	40	1	1	1
	1	7918618	AtoG	-	NA12718,NA12399,HG00119,HG00158,HG00246,NA19235,NA20527,NA20786,NA12751,HG00341,NA12044,HG00349,NA12400,NA19095,HG00117,NA18916,NA07037,NA12716,NA19257,HG00142,HG00326,NA12829	22	1	1	1
	1	7918634	AtoG	-	NA19257,NA18916,HG00246	3	0	0	0
	1	7918640	AtoG	-	HG00142,NA06985,NA18511,NA12716,HG00342,NA07037,HG01334,NA19131,HG00355,HG00117,NA20786,NA19190,NA19257,HG00284,NA12842,NA12058,NA19095,HG00315,HG00179,NA12044,NA18916,HG00336,NA12751,HG00131,NA19235,NA19113,HG00326,NA12413,HG00139,HG00378,HG00246,HG00338,NA12399,NA12718,NA20527	35	1	1	1
	1	7918648	AtoG	-	HG01334,NA07037,NA18511,NA12718,HG00342,NA12716,NA20527,HG00326,NA19257,HG00142,HG00117,NA12044,HG00355,HG00139,HG00336,HG00179,NA12751,NA20786,NA06985,NA19190,NA12400,HG00246,NA12842,NA12058,HG00378,HG00325,HG00131,NA19113,NA18916,HG00315,NA19095,NA19131,HG00284,NA12399	34	1	1	1
	1	7919245	AtoG	-	HG00117,NA12058,NA19131,NA12842	4	1	1	1
	1	7919251	AtoG	-	NA12058,NA19131,NA12842,HG00117	4	1	0	1
	1	7919263	AtoG	-	NA12842,NA12058,NA20527,HG00117	4	1	0	1
	1	7919264	AtoG	-	NA20527,NA12058,HG00117	3	1	0	1
	1	7919380	AtoG	-	NA12842,HG00117,NA18511	3	1	0	1
	1	7919386	AtoG	-	NA12399,HG00105,NA19113,NA20796,HG01334,NA18511,HG00117,NA18912,HG00378	9	1	0	1
	1	7919399	AtoG	-	NA07347,NA12399	2	1	0	1
	1	7919400	AtoG	-	HG00355,NA20527,NA19113,NA07347,NA20796,HG01334,HG00117,NA18511,NA12399	9	1	0	1
	1	7919408	AtoG	-	NA20527,NA07347,HG00378,NA18912	4	0	0	0
	1	7919432	AtoG	-	NA18912,HG00378,NA19113,HG00131,NA18511	5	1	0	1
	1	7919452	AtoG	-	NA12842,NA20527,NA20796,HG00179,HG00355	5	1	1	1
	1	7919463	AtoG	-	HG00131,HG00105,HG00096,HG00179,NA20527,HG00355,NA18511,NA20796	8	1	0	1
	1	7919485	AtoG	-	NA12399,HG00179,NA12842,NA19113,NA20796,HG00105,HG00096,HG00131,HG01334,HG00378	10	1	1	1
	1	7919583	AtoG	-	NA07347,HG00131,HG00336,HG00179,NA20796,NA12716	6	0	0	0
	1	7919596	AtoG	-	NA19118,NA19098,HG00141,HG00336,HG00342,HG00325,NA12348,HG00242,NA12399,HG00365,HG00355,NA20812,NA20796,NA12751,HG00235,HG00097,HG00246,NA19257,NA07347,HG00117,NA12716,NA20756,HG00105	23	1	0	1
	1	7919597	AtoG	-	HG00325,NA19257,HG00139,HG00105	4	1	0	1
	1	7919605	AtoG	-	HG00096,NA18511,NA12842,HG00131,NA12348,HG00355,NA12716,HG00179,HG00342,HG00159,NA20812,HG00234,NA20527,HG00105,HG00235,HG00309,HG00325,HG00378,HG00158,HG00336,NA12751,NA20796,NA19257,NA12341,HG00246,NA07347,HG00117,HG00242,HG00141,NA20756,NA12399,NA19118	32	1	0	1
	1	7919614	AtoG	-	NA12399,NA12716,HG00179,HG00139,HG00342,HG00234,NA20796,NA12751,HG00131,HG00158,HG00378,NA12842,NA07347,HG00141	14	0	0	0
	1	7919622	AtoG	-	HG00355,HG00309,NA12341,NA12045,HG00139,HG00179,HG00159,NA19098,HG00105,NA20796,HG00141,NA12716,HG00158,HG00246,HG00371,HG00234,HG00097,NA18511,NA12400,NA20527	20	1	1	1
	1	7919623	AtoG	-	HG00159,HG00309,NA12348,HG00158,HG00365,HG00105,HG00371,NA12045,HG00336	9	1	0	1
	1	7919637	AtoG	-	HG00096,NA19118,HG00246,HG00309,NA19257,HG00355,HG00097,HG00371,NA20756,NA12399,HG00234,NA12716,NA18511,NA12842,HG00342,HG00179,HG00242,HG00365,HG00364,NA20527,NA19098,HG00139,NA12348	23	1	0	1
	1	7919648	AtoG	-	NA12400,HG00141,HG00309,HG00131,NA12348,HG00117,NA07347,NA19184,NA12341,HG00242,NA20504	11	1	0	1
	1	7919653	AtoG	-	NA12348,HG00179,HG00365,HG00235,NA20812,HG00378,HG00309,HG00364,NA12400,HG00342,HG00242,HG00371,NA18511,HG00117,NA20504,NA12341,NA12842,HG00246,NA12716,HG00158,NA19184,HG00141	22	1	1	1
	1	7919682	AtoG	-	NA20504,NA19184,HG00364,NA12751,NA12045,HG00234,HG00342,HG00242	8	1	1	1
	1	7920395	AtoG	-	NA07347,NA12716,HG00342,HG00235,NA12275,NA12399,NA07357,NA20530,HG00284,NA20796,NA11830,NA12778,NA12842,HG00378,NA11893,NA19113,HG00364,HG00338,NA20531,HG00096,NA19257	21	1	1	1
	1	7920399	AtoG	-	NA19147,HG00131	2	0	0	0
	1	7920401	AtoG	-	NA11881,NA11893,NA12716,NA12778,HG01334,NA07347,HG00131,HG00096,NA12400,NA12842,NA19146,NA12275,HG00364,NA12383,NA20792,NA19113,NA20505,NA07357,HG00105,NA12399,HG00378,HG00343,NA19235,NA20519,HG00139,HG00342,HG00326,HG00235,NA20513,HG00338,NA20756,NA19147,NA19257,NA20796,NA19207,HG00371	36	1	1	1
	1	7920413	AtoG	-	NA06986,NA18511,NA12778,HG00179,NA12058,NA19113,HG01791,NA19235,HG00131,NA19147,HG00117,NA19131,HG00365,NA11893,HG00378,NA12716,NA20527,NA20771,HG00371,NA18912	20	1	0	1
	1	7920414	AtoG	-	NA19257,NA19113,NA12778,NA12275,HG00131,HG00133	6	1	0	1
	1	7920434	AtoG	-	NA19214,HG00384,HG00343,NA20756,HG00309,NA20530,NA18912,NA12383,NA19113,HG00365,NA12399,HG00378,NA20508,NA12058,NA19095,NA06986,HG01791,NA20792,NA18910,HG00355,HG00284,HG00117,NA12778,NA20796,NA12400,HG00325,HG00142,HG00371,NA20786,NA12842,HG00364,HG01334,HG00096,HG00342,HG00137,NA20505,NA11893,NA20509,NA12716,NA07056,HG00131,NA11881,HG00179,NA19257,NA19207,NA19118,HG00158,NA11830,NA19147,NA19235…	65	1	1	1
	1	7920442	AtoG	-	NA19235,NA20527,HG00105,HG00284,NA19113,NA12716,HG00096,NA19257,NA20801,HG01791,NA12751,HG00117,HG00189,NA20509,NA19146,HG00179,HG00142,NA12778,NA06986,HG00338,HG00342,HG00309,NA18511,NA20519,NA20756,NA12058,HG00133,NA19095,HG00378,HG00384,NA20508,NA12399	32	1	0	1
	1	7920462	AtoG	-	NA12399,HG01334,HG00342,NA18934,NA20530,NA20771,NA19257,NA20796,HG00284,HG00139,NA20527,NA20531,NA12763,NA19118,NA12716,NA18486,NA18912,HG00364,NA18910,HG00142,NA12842,HG00183,NA07347,NA18511,NA20801,HG00355,HG00131,HG00378,NA06986,NA11830,HG00330,NA12829,NA12383,NA12751,NA12058	35	1	1	1
	1	7920465	AtoG	-	HG00365,HG00105,NA18910,NA19118,NA19235,NA20771,NA18912,HG00235,HG00242,HG00378,HG00325,NA20505,NA18511,HG00183,NA20513,NA19095,HG00142,HG00309,NA12058,HG00384,HG00326,HG01334,NA11830,NA19257,NA12399,HG00355,NA12400,NA12829,NA06986,NA18486,NA20527,NA19131,NA07347,NA20509,NA18934,HG00139,NA18916,NA20530,NA19146,HG00189,HG00143,NA20796,HG00364,HG00117,HG00237,NA20531,NA11893,NA19214,NA11894,NA19207…	67	1	1	1
	1	7920470	AtoG	-	NA06986,NA20796,HG00365,NA12399,NA19095,NA20786,HG01791	7	1	0	1
	1	7920477	AtoG	-	NA12399,NA19214,NA11881,HG00284,NA12716,NA07347,NA18916,HG00117,HG00365,HG00183,HG00139,NA20530,NA06986,NA11830,NA20519,HG00131,NA20796,NA19118,NA20527,HG00105,NA19235,NA18912,HG00378,NA20505,HG00309,NA12058,HG00355,NA19257,NA12829,NA19147	30	1	0	1
	1	7920478	AtoG	-	NA06986,NA11881,HG00131,NA07357,NA11830,NA18511,NA20519,HG01791,HG00237,HG00309,HG01334,NA20530,HG00139,NA12829,NA18916,NA20513,HG00242,HG00325,HG00384,NA19147,HG00343,NA19257,NA12763,NA07347,NA07056,HG00342,HG00365,NA19207,NA20792,NA18910,NA20786,HG00183,NA20527,NA20509,NA20505,HG00330,NA18912,NA12842,HG00235,NA20801,HG00179,NA11893,NA19235,HG00284,NA12058,HG00378,NA20531,HG00142,NA20796,NA12400…	60	1	1	1
	1	7920479	AtoG	-	NA12716,NA20786,NA19257,NA07347,HG00342,NA19095,NA07357,HG00284,NA12842,NA06986,HG00343,HG00235,HG00330,NA20527,HG00242,NA18912,NA11881,NA11830,HG01334,NA18486,NA18511,HG00142,NA18934,NA20796,NA19118,NA19147,HG00117,HG01791,HG00139,NA11893,HG00309,NA20792,NA12399,HG00378,NA19235,HG00326,NA20530,HG00237,NA18910,NA20509,HG00131,HG00384,HG00365	43	1	1	1
	1	7920510	AtoG	-	NA19118,NA19257,HG00139,HG00235	4	1	0	1
	1	7920515	AtoG	-	HG00117,NA12399,HG00355,NA19257,HG00384,HG00326	6	0	0	0
	1	7920525	AtoG	-	NA11893,NA20513,NA11830,HG00189,HG00378,HG00284,NA12275,HG00355,NA19146,NA07357,NA12842,HG00330,NA06986,NA12348,NA12751,HG01334,HG00242,HG00137,NA18511,NA07347,NA19113,NA19213,NA20508,NA19256,NA19095,HG00187,HG00325,HG00371,NA19235,NA12778,NA19098,NA18486,HG00117,NA12716,HG00235,HG00179,NA20756,NA19093,HG00158,NA07056,HG00096,HG00133,HG00326,NA20519	44	1	1	1
	1	7920528	AtoG	-	HG01334,NA12716,NA18511,HG00326,NA11893,HG00309,NA07347,NA11830,NA19095,HG00142,HG00235,HG00143,HG00179,HG00330,NA12778,HG00117,NA20509,NA19235,NA18486,NA12275,NA19213,NA19256,NA12348	23	1	1	1
	1	7920531	AtoG	-	NA20756,HG00371	2	0	0	0
	1	7920538	AtoG	-	NA18912,NA18511,NA12751,NA18910,NA19095,HG00179,HG00117,HG00158,HG00355,NA19131	10	1	0	1
	1	7920550	AtoG	-	HG00117,HG00141,NA12044,NA18916,NA19118,NA07056,NA12716,NA20527,NA19093	9	1	1	1
	1	7920567	AtoG	-	HG00187,HG00142,HG00137,NA20508,HG00330,NA20505,NA19213,NA19256,NA18511,HG00242,NA19257,NA12716,NA19131,HG00378,NA12275,HG00355,HG00105,NA12778,NA19098,HG01334,NA06986,NA18908,NA20530,HG00143,NA20531,HG00131,NA12399,NA20756,NA20801,NA18910,NA12842,NA20527,NA12044,NA11893,NA07347,HG00237,NA19093,NA19207,HG00117,HG00342,NA19113,HG00235,HG00096,NA18486,HG00141,NA20513,NA19118,HG00384,HG00371,NA19095…	54	1	1	1
	1	7920568	AtoG	-	NA12716,NA19207,HG00342,NA20801,NA18912,NA19113,NA12044,HG00133,NA20527,HG00131,NA12751,NA18486,NA18511,NA20509,HG00235,NA19131,NA07347,HG00143,NA18916,NA11881,HG00117,HG00141,NA20513,NA19256,NA19213,HG00142,HG00139,NA19095,NA19118,HG00378,NA06986,NA12778,NA18908,NA20531,HG00330,HG00242,NA12399,NA12842	38	1	1	1
	1	7920589	AtoG	-	NA06986,HG01334,HG00117,HG00137,NA18910,HG00187,HG00326,HG00158,NA20756,NA19256,NA20530,HG00142,NA19235,NA19093,NA20505,HG00119,HG00234,NA11893,HG00096,HG00342,HG00242,NA12348,HG00355,NA18912,NA12399,NA12778,NA19095,NA12751,HG00105,NA19098,NA19131,NA12058	32	1	0	1
	1	7920607	AtoG	-	HG01334,HG00234,NA20527,NA19257,NA19118,HG00342,NA20756,HG00131,NA12399,HG00117,NA12778,NA20513,HG00119,NA12058,HG00096,NA18511,HG00139	17	1	0	1
	1	7920613	AtoG	-	HG00234,NA20756,NA18912,HG00187	4	1	0	1
	1	7920629	AtoG	-	HG00141,HG00117,NA12751,HG00342,NA07347,NA19257,NA19095,HG00378,HG01334,NA20508	10	1	1	1
	1	7920637	AtoG	-	HG00096,HG00105,HG00330,NA06986,NA19095,NA12751,NA20505,NA12842,NA12348,NA19257,HG00378,NA12399,NA19207,NA20527,HG00342,HG00355,HG00234,NA19118,NA18912,NA11893,NA20756,NA07347,HG00131,HG00141,HG01334,NA19098,HG00158,HG00137,HG00117,NA12058,NA18908,HG00119,NA20530,NA20513,NA18916,HG00242,HG00139,NA18511,NA18910	39	1	1	1
	1	7920645	AtoG	-	NA19095,NA19257	2	0	0	0
	1	8358590	AtoG	-	HG00103,HG00133,HG00237,NA11843	4	0	0	0
	1	8359794	AtoG	-	HG00251,HG00369,NA11992,NA18502,NA18505,NA18868,NA18917,NA19113,NA19114,NA19141,NA19143,NA19152,NA19198,NA19200,NA19201,NA19247,NA20528,NA20803	18	0	0	0
	1	8359813	AtoG	-	HG00232,NA18868	2	0	0	0
	1	8365840	AtoG	-	HG00178,NA07000,NA12272	3	0	0	0
	1	8868834	AtoG	-	NA19147,NA19210	2	1	0	1
	1	8868919	AtoG	-	NA19147,NA19210	2	0	0	0
	1	8868977	AtoG	-	NA19147,NA18870,NA19210	3	1	0	1
	1	8869645	AtoG	-	NA19207,NA19171,NA18870	3	0	0	0
	1	8869656	AtoG	-	NA19146,NA19207,NA19171	3	0	0	0
	1	8869736	AtoG	-	NA19207,NA19171,NA18870,NA19257	4	1	0	1
	1	8869742	AtoG	-	NA19207,NA19257,NA19171	3	1	0	1
	1	8869763	AtoG	-	NA18870,NA19171	2	0	0	0
	1	8869768	AtoG	-	NA19257,NA18870,NA19207,NA19146,NA19171	5	1	0	1
	1	8869839	AtoG	-	NA19257,NA18870,NA19146,NA19207,NA19171	5	0	0	1
	1	9036401	AtoG	-	NA19093,HG00119,NA20519,HG00137,HG00109,HG00355,HG00315,HG00130,HG00117,HG00257,NA18934,NA11994,HG00378,HG00367,NA19131,HG00150,NA19108,NA19095,HG00157,HG00244,HG00131,NA19130,HG00324,HG00263,NA20543,NA20527,HG00112,NA19225,HG00276,NA19257,HG00127,NA12751,NA19096,HG00111,NA07347	35	1	1	1
	1	9036420	AtoG	-	NA19257,HG00117,HG00137,NA19130,HG00115,HG00367,HG00259,NA19095,HG00315,HG00112,HG00111,NA20519,HG00131,NA20527,NA20512,HG00355	16	1	1	1
	1	9036423	AtoG	-	NA20512,HG00117,HG00263,NA19130,HG00244,NA20519,HG00115,HG00137,NA19131,HG00131,NA20527,HG00259,NA19095,HG00355,HG00367,NA19257	16	1	1	1
	1	9036432	AtoG	-	HG00131,HG00324,HG00367,NA19131	4	1	0	1
	1	9036433	AtoG	-	NA19257,HG00324,HG00367,HG00117,NA19131,HG00263,HG00111,HG00131,NA19130,NA20527,NA20519,HG00115	12	1	1	1
	1	9100841	AtoG	-	HG00187,NA19206,NA12546,NA12286,NA19147,NA20795,NA18870,HG00238,HG00332,NA18873,NA20535,NA19172,HG00371,NA19118,NA20813,HG00337,NA19121,NA18909,HG00380,HG00119,HG00159,NA12842,HG00336,NA20761,HG00379,NA20515,NA20803,NA11832,NA20543,NA20519,NA20518,HG00327,NA19143,HG00321,NA20509,HG00285,NA19098,HG00130,HG00117,NA18486,HG00261,NA12762,NA20539,NA12144,NA20516,HG00326,NA19119,NA12287,HG00123,NA20765…	206	1	1	1
	1	9100842	AtoG	-	NA20802,NA20530,HG00120	3	0	0	1
	1	9100848	AtoG	-	HG00123,NA12286,NA20535,HG01334,HG00261,HG00365,NA20766,NA20787,HG00262,HG00255,NA12282,NA20581,HG00120,NA19197,NA12843,HG00353,HG00187,NA20512,NA19152,NA19198,NA20589	21	1	0	1
	1	9100863	AtoG	-	NA20530,NA18873,NA20766,HG00371,HG00179,HG00278,NA19129,NA20828,HG00255,NA20589,NA20756,HG00128,HG00281,NA19117,NA20535,HG00244,HG00336,NA20505,HG00240,NA06986	20	1	0	1
	1	9100864	AtoG	-	NA20530,NA20787,NA20757,NA20582,NA20505,HG00367,HG00273,NA19197	8	0	0	0
	1	9100877	AtoG	-	HG00128,HG00343,NA20761,HG00187,NA11894	5	1	0	1
	1	9100890	AtoG	-	HG00108,HG00358,HG00157,NA12762,NA20801,NA20516,NA19117,NA12282,HG00332,HG00237,HG00138,NA20783,HG00244,NA20761	14	1	0	1
	1	9100899	AtoG	-	NA19147,NA20529,NA12874,HG00238,NA20512,HG00278,HG00273,NA20801,HG00118,NA20766,NA11893,HG00261,HG00180,NA06986,NA20544,HG00367,HG00125,HG00110,HG00358,HG00356,NA11994,HG00117,NA12873,HG00182,NA12813,HG00325,HG00157,NA19190,HG01334,NA19130,HG00146,NA20768,HG00276,NA20532,NA20802,HG00233,HG00331,HG00384,NA20534,HG00142,HG00315,HG00116,NA12829,NA19129,NA19131,HG00237,NA18502,HG00328,NA12761,HG00371…	200	1	1	1
	1	9100904	AtoG	-	NA20543,HG00358,HG00182,HG00105,NA20795,HG00331,HG00315,NA18502,NA12761,NA20803,HG00320,HG00337,NA18488,HG00366,HG00364,HG00285,NA20787,HG00238,NA18870,HG00371,HG00237,HG00328,HG00116,NA20534,NA12829,NA20813,HG00271,NA20828,HG00373,NA20752,NA20502,NA19200,NA12341,NA18933,NA19201,NA20525,NA18923,NA19204,NA12342,NA20805,NA20800,NA18916,NA12842,NA20589,HG00268,NA12763,HG00234,NA20796,NA19223,NA20801…	212	1	1	1
	1	9100916	AtoG	-	NA10847,HG00342,NA19172,HG01334,NA20773,HG00138,NA11829,HG00265,NA20811,HG00108,HG00137,NA20504,NA19197,NA11893,HG00261,NA20536,NA19143,HG00277,HG00384,NA19147,HG00109,HG00141,NA11840,HG00179,HG00344,HG00328,NA19129,HG00176,NA20588,NA19118,HG00244,NA18909,HG00185,NA20539,HG00123,NA12400,NA12154,NA19119,NA20538,HG00178,NA12155,HG00380,NA20530,NA20806,NA18873,NA19121,NA19171,HG00325,HG00343,NA20774…	205	1	1	1
	1	9100917	AtoG	-	HG00138,NA20801,NA20773,NA12813,HG00384,NA19223,HG00146,HG00118,HG00180,NA20807,NA20792,NA19129,NA20581,NA11829,NA06986,NA20768,NA20803,HG01334,NA12286,NA19204,NA07357,NA12347,NA12873,NA20828,NA20800,NA20783,NA20589,NA20806,HG00285,NA11995,HG00109,NA11894,HG00131,HG00328,HG00278,NA20811,NA20543,NA12144,NA19147,HG00117,NA12155,HG00110,HG00325,NA20582,HG00154,HG00364,NA19171,NA20518,NA18502,NA20795…	115	1	0	1
	1	9100923	AtoG	-	HG00178,NA19209,NA18908,NA12400,HG01791,NA20509,NA18909,HG00097,NA20588,NA20804,HG00176,NA07051,HG00240,HG00114,NA19206,NA12383,HG00143,HG00234,HG00268,HG00278,NA19114,NA11832,NA12874,NA19147,HG00339,NA11881,HG00378,NA12813,NA19129,NA20800,NA20828,NA12347,NA12342,NA19204,HG00171,NA20785,NA18923,NA20525,NA19201,NA19131,NA18933,NA20826,NA12341,NA19200,HG00336,NA20502,NA20752,HG00373,HG00119,HG00159…	234	1	0	1
	1	9100930	AtoG	-	HG00365,NA11831,HG00327,NA20803,HG00310,HG00180,NA20795,HG00358,HG00142,NA20792,NA12776,HG00263,NA20540,NA19129,NA19171,HG00108,NA12282,NA19138,HG00384,HG00325,HG00273,NA20504,NA19113,HG00157,NA20539,HG00379,NA19190,NA20505,NA18923,HG01334,NA12546,HG00143,NA12006,NA12763,NA20796,HG00344,HG00324,NA20589,HG00269,NA12842,HG00132,NA18916,HG00380,HG00332,NA20800,HG00285,NA11920,NA20828,NA19121,NA20518…	221	1	1	1
	1	9100937	AtoG	-	HG00271,NA19197,NA20512,NA20503,NA18488,HG00328,HG00369,HG00158,NA12286,NA06986,NA19114,NA12843,HG00142,NA20806,NA11832,NA12874,HG00117,HG00130,NA20527,NA19092,HG00320,NA12004,NA20534,HG00138,HG00119,HG00157,HG00371,NA20787,HG00325,HG00118,HG01334,NA20539,NA20810,NA19129,NA19138,HG00141,NA20752,HG00276,HG00349,NA20801,NA20785,HG00285,NA18923,NA20525,NA12546,HG00122,NA20515,HG00233,NA20518,NA18933…	100	1	1	1
	1	9100942	AtoG	-	HG00185,HG00325,NA20518,HG00353,NA20503,HG00187,NA07357,NA12843,NA12286,NA19117,HG00137,NA12275,NA19152,NA18909,HG00171,NA19197,NA20524,NA20810,NA20502,NA12234,HG01334,HG00142,NA20813,HG00255,HG00158,HG00251,HG00378,HG00157,NA20768,NA20756,NA12155,HG00123,HG00332,HG00320,HG00328,NA11893,HG00315,NA12762,NA20509,NA06986,NA20536,HG00261,HG00117,HG00349,NA20801,NA19119,HG00105,NA20787,HG00356,NA12546…	64	1	1	1
	1	9100949	AtoG	-	NA18916,NA12249,NA20530,HG00326,NA12889,NA20801,NA20527,HG00120,NA11830,HG00137,NA20582,HG00320,NA12842,NA18486	14	1	1	1
	1	9100952	AtoG	-	NA20783,NA11840,NA12006,HG01789,NA11832,NA20524,NA12287,HG00109,HG00353,NA20503,NA19114,HG00328,NA19147,HG00369,NA12286,HG00335,NA19092,HG00378,HG00130,NA06986,HG00339,NA20770,HG00244,NA20806,NA20527,HG00158,HG00128,NA19197,HG00367,NA18923,NA20525,NA19152,NA18909,HG00344,HG00123,NA19119,NA20588,HG01791,HG00326,HG00097,NA12400,NA18908,HG00176,NA20813,HG00332,NA07051,NA19206,NA20765,NA19209,HG00240…	246	1	1	1
	1	9100953	AtoG	-	NA19147,NA20543,HG00187,HG00310,NA20806,NA20516,HG00265,NA20528,NA20582,HG00262,HG00336,HG00157,HG00138,NA20819,NA12775,NA20761,HG00119,HG01334,HG00324,NA18498,NA20752,NA19119,HG00240,NA18923,HG00278,NA20768,HG00349,HG00384,NA11893	29	1	0	1
	1	9100957	AtoG	-	HG00380,HG00365,HG00335,HG00265,NA20752,HG01334,NA20761,HG00138,NA12043,NA20582,HG00179,HG00275,HG00271,NA19197,NA18502,NA10847,NA20813,NA19102,HG00315,HG00141,HG00097,HG00157,HG00238,HG00324,NA11894,NA19098,NA20814,NA20807,NA20516	29	1	0	1
	1	9100977	AtoG	-	NA19129,HG00232	2	0	0	1
	1	9101002	AtoG	-	NA12287,HG00281,NA11831,NA20504,HG00146,NA20516,NA20524,NA12749	8	1	0	1
	1	9101006	AtoG	-	NA11831,HG00103,HG00119	3	1	0	1
	1	9101015	AtoG	-	HG00278,NA20544,NA20813,NA19129,NA12760,HG00173,NA07051,NA19143,NA20530,HG00171,HG00277,NA20525,HG00261,NA12813,NA18933,NA11920,HG00130,HG00343,NA12341,NA19121,HG00380,HG00344,HG00273,HG00337,NA19147,NA20792,HG00321,HG00313,HG00276,HG00186,HG00187,NA19095,HG00137,HG01789,NA11832,HG00262,NA20761,NA12763,NA20589,HG00146,NA18916,NA20800,HG00234,NA18923,NA11831,HG00233,NA19118,HG00271,HG01334,NA18488…	179	1	1	1
	1	9101019	AtoG	-	HG00336,NA11832,HG00109,NA20517,NA12006,NA20524,NA20504,HG00232,NA20752,NA11893,HG00339,NA20828,NA12282,NA19129,NA18934,NA11831,NA11881,HG00349,NA20543,HG00335,HG00149,NA20589,HG00146,NA20806,HG00344,HG00231,NA20540,NA19117,NA12286,HG00131,HG00380,NA12813,NA19131,NA11920,NA12341,HG00138,NA19095,HG00187,HG00117,HG01789,HG00114,NA11930,NA20761,HG00141,NA11830,HG00171,HG00321,NA20792,NA12749,NA20787…	61	1	0	1
	1	9101024	AtoG	-	NA20766,HG00108	2	0	0	0
	1	9101057	AtoG	-	NA19197,HG00232,NA20543,HG00149,NA19099,NA20535,HG00265,HG00277	8	0	0	0
	1	9101058	AtoG	-	HG00149,HG00265,NA19117,NA20773,NA20761,HG01334,NA19118,HG00257,NA11830,HG00326,HG00325,HG00380,NA20504,NA12874,HG00146,HG00233,NA20807,NA11920,HG00315,NA11994,NA19130,HG00143,NA18488,HG00339,HG00336,NA20543,HG00342,NA20760,NA20795,HG00263,NA12813,NA20766,NA11831,HG00321,NA19147,NA12761,NA11894,NA12889,NA19114,HG00255,HG00234,HG00142,NA20787,NA20792,NA20589,NA20582,NA12763,NA18873,NA19099,HG00369…	80	1	1	1
	1	9101060	AtoG	-	HG00265,HG00237,NA20752,NA20768,HG00146,HG00178,HG00143	7	1	0	1
	1	9101061	AtoG	-	NA12275,HG00373	2	0	0	0
	1	9101077	AtoG	-	NA20819,NA18916,HG00178,NA12874,HG00278,NA12004,NA06989,NA11893,HG00159,HG00119,HG00356,NA19095,NA19102,HG00342,HG00331,NA20761,NA20518,NA20528,HG00255,NA20512,HG00265,HG00136,NA12761,HG00378,HG00365,HG00273,NA19147,HG00187,NA19131,NA19114,NA20756,HG00233,NA20787,NA20502,HG00364,NA11894,HG00108,HG00375,HG01791,NA20802,HG00320,HG00332,NA19171	43	1	0	1
	1	9101078	AtoG	-	HG00176,NA19130,NA18909,HG00141,NA20518,HG00332,HG00111,HG00178,HG00277,HG00238,HG00143,HG00342,NA06989,NA18873,HG00263,HG00358,NA20530,NA11831,HG00364,NA19102,NA20527,HG00117,HG00336,HG00187,HG00356,NA11832,NA12829,NA20531,HG00097,NA11920,HG00240,NA20802,HG00109,NA20800,HG00154,HG01791,NA12275,NA19095,NA12889,HG00375,NA11894,HG00365,NA20792,NA20801,HG00379,HG00313,NA19114,NA19113,NA12282,HG00331…	144	1	0	1
	1	9101083	AtoG	-	NA20756,HG00278,HG00158,HG00268,NA19119,HG00325,NA07357,NA19121,HG00262,HG00130,HG00261,NA19206,NA20525,HG00379,NA12286,HG01789,NA11840,NA19117,NA18934,HG00344,NA20819,NA20502,NA20787,NA19099,NA20512,HG00271,NA20516,NA19152,NA20757,HG00320,HG00149,NA19118,HG00255,NA11893,NA20752,NA12843,NA20806,HG00257,NA19147,NA11830,NA20538,NA12004,HG00343,NA19143,NA07051,NA12760,HG00233,NA06986,HG00173,NA20813…	173	1	1	1
	1	9101108	AtoG	-	NA11995,NA18488,NA12275,HG00384,NA20527,NA20773,NA12874,NA19143,HG01334,NA20756,HG00313,NA20813,NA20787,NA20504,HG00233	15	1	0	1
	1	9101115	AtoG	-	NA20527,HG00157,HG00138,HG00365,HG00375,NA06986,NA20530,HG00139,HG00146,HG00358,NA12275,HG00141,NA19131,NA20787,NA20813,NA20800,NA20543,NA20512,HG00117,NA19095	20	0	0	1
	1	9101120	AtoG	-	HG00233,NA20530,NA06986,NA20756,HG00117,NA20543	6	1	0	1
	1	9101140	AtoG	-	HG00117,NA20813,NA06986	3	1	0	1
	1	9101144	AtoG	-	HG00117,NA20761,NA19131,NA20509,NA06986	5	1	0	1
	1	9101159	AtoG	-	NA20761,NA06986,NA19114,NA19095,NA20787,NA20800,NA20813,NA07357,NA19131,NA19152,HG00356,NA20509,NA20530,HG00117,NA20527,HG00137,NA20801,NA12775,NA20756,HG00358,NA19129	21	1	0	1
	1	9101172	AtoG	-	NA19113,NA12775,NA20758,NA19200,NA12234,NA18870,NA19129,NA20800,NA20527,HG00138,HG00325,NA19114,HG00240,NA06986,NA20801,HG00130,NA12829,NA12761,NA20787,HG00117,HG00141,NA19204,NA20509,HG00137,HG00244,NA20773,NA20582,HG00356,NA20530,NA11832,HG00187,HG00108,NA20813,NA20761,HG00378,NA19095,NA19131,HG00276,HG00097	39	1	1	1
	1	9101176	AtoG	-	NA20582,NA20509,NA20761,NA20758,HG00378,NA19131,NA19147,HG00117	8	1	0	1
	1	9101180	AtoG	-	NA12282,NA19171	2	0	0	1
	1	9101186	AtoG	-	HG00141,NA12775,HG00137,NA19095,NA18870,HG00187,HG00130,HG00233,HG00375,HG00117,NA20813,NA20787,HG00108,HG00365,HG00378,NA20758,NA20756,NA06986,NA19200,NA20530,NA19171,NA19131,HG00157,HG00138,NA19114,NA20801,HG00325,NA19129,NA20800,NA20582,NA20773,NA19152,HG00358,NA20527,NA12234,HG00244,HG00276,NA07357,NA20761,NA20509,HG00097	41	1	1	1
	1	9101235	AtoG	-	NA20787,HG00325,NA19131,NA19206,NA20756,NA06986,HG00187,NA19095,HG00356,HG00097,HG00141,NA20813,HG00233,HG00117,NA20530,NA20527	16	1	1	1
	1	9101251	AtoG	-	NA20813,HG00097	2	1	0	1
	1	9101259	AtoG	-	HG00117,NA20761,NA20527	3	0	0	0
	1	9101274	AtoG	-	NA06986,NA19131	2	1	0	1
	1	9101306	AtoG	-	NA06986,NA20527	2	1	0	1
	1	9101307	AtoG	-	NA06986,NA20761,HG00117,NA19131,NA20527	5	1	0	1
	1	9101328	AtoG	-	NA20527,HG00233	2	0	0	0
	1	9101599	AtoG	-	NA19131,HG00114,NA11930,NA12045	4	1	0	1
	1	9102147	AtoG	-	NA19118,NA20527,HG00117,NA19131,NA20761,NA19095,HG00114,HG00097,NA20773,NA12716	10	1	1	1
	1	9102164	AtoG	-	NA12716,NA19131,NA20527,HG00117,NA20761,NA19095	6	1	1	1
	1	9102165	AtoG	-	NA20527,NA20761,NA12716,HG00117,NA19118,NA19131,NA19095	7	1	1	1
	1	9102166	AtoG	-	NA19118,NA20761	2	1	0	1
	1	9102175	AtoG	-	NA20761,NA12716,HG00117,NA19095,NA20527	5	1	1	1
	1	9102244	AtoG	-	NA20761,HG00117,NA20527,NA12716	4	1	1	1
	1	9102247	AtoG	-	NA20773,NA12718,NA20504,HG00097,HG00117,NA20527,NA20761,NA12716,NA19131	9	1	0	1
	1	9102253	AtoG	-	HG00117,NA19131,NA20801,NA12718	4	1	0	1
	1	9102262	AtoG	-	NA20761,NA20527,NA11893	3	1	0	1
	1	9102263	AtoG	-	NA20515,NA20800,HG00365	3	0	0	0
	1	9102273	AtoG	-	NA20503,HG00343	2	1	0	1
	1	9102283	AtoG	-	NA19225,NA19138,HG00180,HG00108,HG00343,NA18510,NA19171,NA19121,NA20800	9	0	0	1
	1	9102287	AtoG	-	HG00141,NA11830,HG00157,NA19118,HG00325,NA19119,HG00335,HG00358,HG00154,HG00332,HG00109,NA18912,HG00236,NA11831,HG00131,NA20806,HG00116,NA20774,NA12843,NA11893,HG00097,NA19225,NA19117,NA19200,HG00364,HG00138,NA12814,NA20801,HG00110,NA19147	30	1	1	1
	1	9102289	AtoG	-	NA20815,HG00187,NA12814,NA20828,HG00138,NA19143,HG00343,NA19147,HG00325,HG00125,NA20506,HG00253,NA19200,NA19129,NA11995,HG00346,NA12043,HG00157,NA20502,HG00285,HG00126,HG00139,NA12778,HG00131,NA20527,NA20518,NA12718,HG00255,NA19225,NA12342,HG00252,HG00142,HG00234,NA19235,NA19204,NA12154,HG00328,HG00146,HG00097,NA18486,HG00114,NA20540,NA19102,NA20802,HG00309,HG00276,NA18510,NA20801,NA12873,NA19160…	201	1	1	1
	1	9102302	AtoG	-	NA12383,NA19248,NA12763,NA19200,HG00278,NA20589,NA18488,HG00255,HG00179,NA20752,NA18861,NA20515,HG00320,NA20801,HG00285,HG00131,NA12045,NA12829,NA20581,HG00271,HG00142,NA20813,HG00246,NA12718,NA12282,HG00330,HG00284,HG00177,NA20518,NA19121,NA11831,HG00125,NA19129,HG00364,NA19138,HG00268,NA12286,HG00114,NA12275,NA07357,NA18909,HG00234,NA18923,HG00097,NA19225,HG00324,NA20524,NA12889,NA19107,NA20502…	200	1	1	1
	1	9102303	AtoG	-	HG00309,NA12342,HG00262,NA11994,NA11832,NA19107,HG00273,HG00255,NA19189,HG01334,NA19147,NA20811,NA20796,NA19143,NA20536,NA19197,HG00141,NA18870,HG00182,HG00323,NA19171,HG00178,NA20581,NA12874,HG00097,NA20795,NA20503,NA20524,NA19117,NA19102,NA20802,NA20588,HG00131,NA20815,NA19131,NA19095,HG00116,NA18933,NA20828,NA20515,NA11995,HG00336,HG00335,NA20542,NA18923,HG00282,HG00238,HG00371,NA18861,NA20760…	207	1	1	1
	1	9102328	AtoG	-	HG00133,NA12760,NA20802,NA20801,HG00142,NA20796,HG00154,NA12716,NA18933,NA20772,NA20588,NA12889,NA20543,NA12874,HG00131,HG00342,NA20541,HG00345,NA12286,NA12156,NA12829,HG00159,HG00313,HG00285,NA20530,HG01334,NA11831,NA19204,NA12006,HG00320,NA12342,NA12814,HG00326,NA20807,NA11832,NA12275,HG00232,HG00187,NA18870,HG00108,NA12043,NA11840,NA20538,HG00138,HG00365,NA19117,HG00139,NA20800,NA19116,NA20828…	95	1	1	1
	1	9102335	AtoG	-	NA20588,NA20803,NA19146,NA20802,NA19131,NA20516,NA11831,NA18870,NA12287,NA18502,HG00315,NA19138,NA20773,NA19117,NA20766,NA18933,NA20515,NA12716,HG00336,NA18488,NA19147,NA19095,NA18909,NA20806,NA12275,HG00285,HG00180,HG00187,NA20783,NA18861,NA20518,HG00234,NA19225,NA18923,HG00262,HG00320,HG00365,HG00268,HG00236,NA12843,HG00109,NA11930,HG00159,NA18908,HG00343,NA12813,HG00344,NA12341,NA12829,NA19129…	217	1	1	1
	1	9102345	AtoG	-	NA11930,HG00232	2	0	0	0
	1	9102348	AtoG	-	NA12399,HG00244,NA12762,NA18912,HG00117,HG00364,NA20806,NA20589,NA20582,HG00126,NA20828,HG00284,HG00157,HG00108,NA19149,NA18923,NA19098,HG00097,HG00331,HG00358,NA20815,HG00133,NA20538,NA19130,HG01334,HG00277,NA20761,NA19197,NA20800,NA19131,NA20773,NA07357,HG00335,HG00131,NA20588,NA20504,NA20756,HG00276,NA12763,NA12814,NA19225,HG00185,HG00234,NA20752,NA20813,NA19095,HG00236,NA19171,NA19092,HG00176…	104	1	1	1
	1	9102354	AtoG	-	HG00236,HG00097,HG00112	3	1	0	1
	1	9102358	AtoG	-	NA20801,HG00108,NA12873,NA11893,NA19095,HG00238,NA20813,NA20828	8	0	0	0
	1	9102364	AtoG	-	NA20806,NA19197,HG00125,NA20582,HG00326,NA18909,NA20530,NA20589,HG00131,NA12763,HG00336,NA11893,HG00364,NA20828,HG00285,HG00371,NA18923,HG00345,HG00117,NA18933,HG00342,NA18912,NA12275,HG00384,NA19189,NA20768,NA12873,NA12399,HG00176,NA19118,NA12716,HG00262,NA20760,NA19098,NA20786,HG00238,HG00271,NA20538,NA19099,HG00244,NA19092,NA18499,NA19248,NA20756,HG00097,HG00142,HG00187,HG00236,NA20515,NA20797…	114	1	1	1
	1	9102365	AtoG	-	NA20773,NA20524,NA19117,NA11830,HG00326,NA20806,NA11893,HG00246,NA19248,HG00142,NA19102,NA20538,HG00233,NA12399,NA20756,HG00138,HG00285,HG00242,NA12814,HG00276,HG00342,NA19118,NA19197,HG00117,NA20800,NA20589,NA12275	27	1	0	1
	1	9102392	AtoG	-	NA20527,NA11831,HG00309,NA12814,NA18499,NA20516,HG00346,HG00276,NA19225,HG00364,NA20761,NA12275,HG00117,NA12716,HG00110,HG00097,NA20756,HG00138,NA19095,NA20538,HG00328,NA19098,NA18502,NA18912,NA20800,NA11893,NA20828	27	1	1	1
	1	9102397	AtoG	-	HG00234,HG00364,HG00130,HG00108,NA20800,HG00309,NA19095,HG00313,NA19225,NA20761,NA20796,NA20527,HG00110,HG00097,HG00358,HG00242,NA12716,NA20813,HG00325,NA18502,NA20538,HG00117,HG00138,HG00276,HG00236,NA20828,NA11893,NA12814,NA11830,HG00285,HG00328,NA18912	32	1	0	1
	1	9102925	AtoG	-	HG00137,NA20803,HG00133,NA20773,NA19131	5	0	0	0
	1	9102929	AtoG	-	HG00137,HG00157	2	1	1	1
	1	9102944	AtoG	-	HG00233,NA20504,HG00133,NA12045,NA20768,NA19197,NA12718,HG00097,HG00240,HG00252,HG00187,NA12341,HG00364,NA19129,HG00117,HG00262,NA20828,NA20813,NA20783,NA20756,NA11894,NA20540,NA20806,HG00331,NA20803,HG00345,NA20773,HG00336,NA19108,NA20518,NA20582,NA20787,NA20514,HG00343,HG01791,NA19171,NA20796,HG00114,HG00375,NA19117,NA12889,NA19131,NA20790,HG00342,NA18873	45	1	0	1
	1	9102947	AtoG	-	HG00119,NA20802,NA18873,NA20790	4	1	0	1
	1	9102950	AtoG	-	HG00358,HG00233	2	0	0	0
	1	9102984	AtoG	-	NA19129,NA20504,HG00097,HG00110,HG00262,NA20796	6	1	0	1
	1	9103028	AtoG	-	NA19235,HG00137,NA20790,NA18916,NA12889,NA19197,HG00157	7	0	0	0
	1	9103034	AtoG	-	HG00133,NA20806	2	1	0	1
	1	9103037	AtoG	-	NA20828,NA20504,HG01791,NA11930,HG00240,NA19235,NA19096,NA12718,HG00345,NA20756,NA20582,NA19131,NA20787,NA20803,NA20514,HG00364,HG00331,HG00343,HG00157,NA20813,NA20768,NA19197,HG00336,NA18873,NA11894,HG00262,HG00119,HG00375,HG00252,NA20540,HG00110,NA20783,NA19129,NA12341,HG00097,NA20790,HG00342,HG00233,NA12889,HG00137,HG00117,NA20518,NA20802,NA19171,HG00187,NA20806,NA18916,NA19117,NA19108,NA20773	50	1	1	1
	1	9103041	AtoG	-	HG00342,NA19096,NA20828,HG00343	4	1	0	1
	1	9103044	AtoG	-	NA20768,HG00342	2	0	0	0
	1	9103051	AtoG	-	NA20582,NA19131,NA20787,HG00157,NA20803,HG00364,NA20514,NA20813,HG00343,NA20768,NA18916,NA19117,NA20773,NA20806,NA19108,NA20504,NA20828,HG00187,HG01791,NA20790,NA12341,NA20802,HG00240,NA20518,NA19171,HG00331,HG00133,HG00233,NA20796,HG00358,HG00119,HG00375,HG00252,NA20540,HG00336,HG00110,NA18873,NA19197,NA11894,NA12889,HG00137,HG00117,HG00097,HG00262,NA19129,NA19235,HG00342,NA19096,NA12718,HG00345…	52	1	1	1
	1	9103191	AtoG	-	HG00242,HG00358,NA20813	3	0	0	0
	1	9103196	AtoG	-	HG00278,NA20828	2	0	0	0
	1	9103226	AtoG	-	NA19129,HG00375,NA20815,HG00358,NA19147,HG00262,NA20813,HG00332,HG00321,NA20805,NA06989,NA19102,HG00108,HG00138,NA18933,HG00242,NA11894,HG00187,HG00097,HG00365,NA19197,NA18916,NA19119,HG00369,HG00109,HG00255,NA20525,HG00342,NA19152,NA19131,NA20504,HG00126,HG00180,NA18873,NA19257,NA20828,HG00128,NA12750,NA20534,HG00356,NA19099,NA19095,NA20518,NA20802,HG00278	45	1	0	1
	1	9103231	AtoG	-	NA20534,NA18933,HG00356,NA20801,NA12287,NA12282,HG00097,NA11832,HG00273,NA20752,HG00255,NA19152,HG00277,HG00240,NA19095,HG00358,NA11930,HG00109,HG00369,NA11881,NA20535,NA20792,NA19107,NA19131,HG00102,HG00138,HG00180,HG00242,NA20505,NA19197,HG00141,HG00182,HG00123,NA12718,NA12750,NA20525,HG00342,NA18916,NA11894,NA18870,NA20518,NA20517,HG00108,HG00365,NA20805,NA19147,NA19257,NA19121,HG00128,NA19099…	74	1	1	1
	1	9103232	AtoG	-	NA20505,NA20752,HG00358,HG00108,NA19099,HG00240,NA19257	7	1	0	1
	1	9103236	AtoG	-	NA19121,NA20525,HG00278,NA12750,HG00277	5	1	0	1
	1	9103260	AtoG	-	HG00278,HG00236,NA18908,NA20504,NA19171,HG00262,HG01791,NA20815,HG00109,HG00365,HG00097,HG00187,HG00240,HG00277,NA12750,NA20524,HG00332,NA19147,HG00238,NA20813,NA19108,NA06989,NA18916,NA11894,NA18870,NA20518,NA20517,HG00182,HG00252,HG00108,NA20805,HG00321,NA19152,NA19198,NA11832,NA19197,HG00141,HG00180,HG00242,HG00285,NA20792,NA19107,NA19131,NA19121,NA11881,NA19129,HG00235,HG00138,HG00369,NA20525…	67	1	1	1
	1	9103261	AtoG	-	NA20802,HG00278,HG00235,NA19099	4	1	0	1
	1	9103269	AtoG	-	HG00375,NA19152,HG00123,HG00141,NA18933,NA20801,HG00108,HG00342,NA11894,NA06989,NA20505,NA12750,HG00128,NA19095,HG00344,HG01791,HG00356,NA19099,NA19171,HG00097,HG00278,NA20524,NA19197,NA12287,HG00109,HG00236,HG00149,HG00321,NA20828,NA20813,NA20534,HG00252,NA20805,NA20815,NA19131,NA19107,HG00138	37	1	0	1
	1	9103270	AtoG	-	NA20813,HG00109,HG00252,NA18916,NA20805,NA19257,HG00097,NA19121,HG00342,NA19099,HG00141	11	1	0	1
	1	9103272	AtoG	-	NA11894,HG00109,NA19257,NA19197,HG00365,NA20813,HG00149,NA19147,NA19152,NA19095	10	1	0	1
	1	9103275	AtoG	-	HG00252,HG00149,HG00285,NA12282,NA20581,NA20792,HG00356,HG00180,HG00235,NA19257,NA20752,NA20813,NA19171,HG00123,NA19198,NA12287,NA11832,HG00332,HG00358,NA20524,HG00375,HG00344,HG00255,NA20534,NA19147,NA11894,HG00369,NA18933,NA12750,HG00108,NA20505,NA18870,NA19099,NA20801,NA12718,NA19131,NA19129,NA20535,NA20828,NA11881,NA19121,HG00141,NA19197,NA20525,HG00109,NA19095,HG00353,HG00238,NA18873,HG00342…	77	1	0	1
	1	9103301	AtoG	-	NA19107,HG00097,HG00123,HG00358,NA12287,NA19152,HG00375,HG00138,HG00332,HG00238,NA11894,NA20525,HG00353,NA18870,HG00102,NA20828,NA19257,NA12043,HG00365,HG00179,HG00262,NA19131,NA20813,NA20518,NA20504,NA12282,NA19129,HG00143,NA20581,HG00149,NA12718,NA19171,HG00252,NA20815,HG00141,HG00240,HG00187,HG00128,NA19147,NA19197,NA19099,HG00242,HG00278,HG00285	44	1	0	1
	1	9103302	AtoG	-	HG00356,HG00097,NA20581,NA19107,HG00242,NA20802,HG00141,NA19257,NA19152,NA19147,HG00128,HG00143,NA19099,HG00375,NA20813,NA20801,NA19129,NA20752,NA19095,HG00252,NA20524,NA20525,NA18916,HG00369,NA20792,HG00285,HG00187,HG00149,HG00108,HG00278,NA19197,NA20828,NA19108,NA12718,HG00332,HG00342,HG00240,NA12043,HG00236,NA11894,HG00365,NA20504,NA19198,NA11930,HG00109,NA19131	46	1	1	1
	1	9103324	AtoG	-	HG00238,NA19131,HG00138,NA19152,HG00277,HG00097,HG00235,HG00242,NA19095,NA12750,NA19197,HG00273,NA18916,HG00356,NA19108,HG00182,NA19099,NA20524,HG00252,NA12282,NA19257,NA20504,NA20813,HG00108,HG00375,NA18870,NA20801,HG00342,NA20752,HG00353,HG00179,HG00358,NA19102,HG00262	34	1	0	1
	1	9103328	AtoG	-	HG00273,HG00262,HG00108,NA18916,HG00358,HG00109,HG00375,HG00128,NA19108,HG00179,NA18870,HG00365,NA19131,NA20518,NA20813,NA20524,NA20828,NA20805,NA19147,HG00356,HG00187,HG00238,HG00141,NA12750,NA19102,HG00342,NA19099,HG00285,NA19257,HG00278,NA19197,HG00138,NA19119,HG00369,HG00182,NA20802,NA20752,NA20801,HG00353,HG00277,HG00126,HG00255,HG00097,NA19129,HG00252	45	1	1	1
	1	9103331	AtoG	-	HG00353,HG00187	2	1	0	1
	1	9103334	AtoG	-	HG00108,HG00342	2	0	0	0
	1	9103340	AtoG	-	HG00108,NA19095,HG00285,HG00187	4	1	0	1
	1	9103341	AtoG	-	HG00353,HG00238,HG00187	3	1	0	1
	1	9103342	AtoG	-	NA19257,NA20813,NA19095,HG00353	4	1	0	1
	1	9103343	AtoG	-	HG00128,HG00262,NA19197,NA19257,NA19131,HG00238,HG00182,NA19108,HG00138,NA20813,NA19095,HG00187,HG00097,HG00108	14	1	1	1
	1	9103346	AtoG	-	HG00187,NA19131,NA19257,HG00097,HG00128,NA19108	6	1	0	1
	1	9103415	AtoG	-	NA19108,NA20524,NA19131,HG00277	4	1	0	1
	1	9103443	AtoG	-	NA19197,NA19131,HG00358,NA19108,HG00138,HG00097,HG00108,HG00114,NA19095,HG00344,NA20813,NA19257,HG00187,NA20524,HG00262	15	1	1	1
	1	9103453	AtoG	-	HG00138,HG00114	2	1	0	1
	1	9103504	AtoG	-	HG00344,HG00097	2	0	0	0
	1	9103530	AtoG	-	NA19095,HG00114	2	1	0	1
	1	9148916	AtoG	-	NA11920,HG00346,HG00110,HG00306,HG00371,HG00240	6	1	0	1
	1	9148961	AtoG	-	HG00146,HG00155,HG00257,HG00154,HG00251,HG00097,HG00285,NA20585,NA12762,HG00278,NA19114,NA20540,HG00120,NA20539,NA12347,NA20772,HG00232,HG00276,NA12813,HG00131,HG00265,NA20828,HG00280,HG00320,NA20806,HG00366,NA20518,HG00266,HG00372	29	1	0	1
	1	9148979	AtoG	-	NA20582,HG00344,HG00276,NA19213,HG00257,HG00346	6	1	0	1
	1	9148988	AtoG	-	NA12814,HG00119,NA12829,NA20513,NA19114,HG00129,NA10847,NA20585,HG00335,HG00362,HG00276,NA20519,HG00177,HG00246,NA12874,NA19223,HG00112,HG01791,NA20530,NA20769,NA20588,NA12776,NA12156,NA20773,HG00344,HG00345,HG00236	27	1	1	1
	1	9148992	AtoG	-	NA19098,HG00103,HG00131,HG01791,NA11931,HG00235,HG00369,NA19118,NA20531,NA20773,HG00114,NA19131,NA19116,NA12156,NA11930,HG00372,NA12751,HG00121,HG00356,HG00315,HG00268,NA19149,NA06989,HG00263,HG00177,HG00256,HG00138,HG00233,NA11829,HG00154,NA20506,HG00362,NA19130,NA12812,NA12347,NA12814,HG00120,HG00265,HG00183,NA20513,HG00278,NA19114,NA20588,NA19147,HG00271,NA20530,NA12874,NA20518,NA12716,HG00133…	166	1	1	1
	1	9149019	AtoG	-	HG00103,NA12776,NA20771,NA19118,NA20531,HG00278,NA19098,NA07357,HG00097,HG00332,NA12275,NA20796,NA12814,NA06986,NA20806,HG00155,HG00331,NA20539,NA20814,HG00323,NA12347,NA12340,HG00129,NA10847,HG00346,NA20760,HG00251,HG00268,HG00315,NA12156,HG00142,NA06984,HG00245,HG00257,NA12282,HG00121,HG00325,HG00250,HG00313,HG00120,NA18498,NA20759,NA20769,NA20513,NA19130,HG00157,NA12829,NA20525,HG00362,NA20506…	179	1	1	1
	1	9149031	AtoG	-	NA20828,HG00262,HG00342,NA20512,HG00323,NA20588,NA12750,NA20814,HG00280,HG00112,HG00269	11	1	0	1
	1	9149070	AtoG	-	HG00236,HG00121	2	0	0	0
	1	9149087	AtoG	-	HG00309,NA20768,NA12383,HG00344,NA12716,NA12874,HG00324,NA20519,NA19204,HG00114,HG00133,NA06989,HG00119,NA12282,HG00280,HG00306,NA20765,HG01791,NA19129,NA12750,HG00346,HG00131,HG00146,HG00369,HG00328,HG00142,NA18909,NA20513,NA20828,HG00335,NA20528,HG00334,NA07357,HG00250,HG00313,NA11830,HG00265,HG00325,HG00257,NA11894,NA12058,NA19197,HG00111,HG00271,NA12347,NA19098,HG00266,HG00103,NA20524,HG00234…	59	1	1	1
	1	9149088	AtoG	-	NA10847,NA20543,NA06986,HG00346,NA19197,NA12275,NA11931,HG00133,NA12716,HG00232,HG00309,HG00111,NA18923,NA19204,HG00142,NA20530,HG00265,NA11894,NA20513,HG00109	20	1	1	1
	1	9149092	AtoG	-	HG00183,HG00114,NA20519,NA11931,HG00324,NA12383,NA12763,HG00262,NA18916,NA12812,NA11829,HG00372,NA20530,NA12889,HG00361,NA19149,HG00234,HG00265,NA19107,HG00364,HG00277,NA20801,HG00110,HG00321,NA12400,NA12347,HG00182,HG00256,NA11930,HG00263,NA20808,NA20814,HG00309,NA19198,HG00138,HG00285,NA12341,NA12058,HG00315,NA19113,NA20765,HG00157,NA12750,NA18923,HG00306,HG00280,NA20539,NA20512,HG00375,NA19256…	134	1	1	1
	1	9149098	AtoG	-	NA07347,NA12814,HG00271,NA19107,HG00364,HG00106,HG00109,NA12347,HG00119,HG00369,HG00266,NA20530,HG00343,HG00146,HG00361,NA20515,NA18917,NA20524,NA12286,HG00335,HG00325,HG00232,HG00250,NA19116,HG00277,NA20527,NA12156,HG00233,HG00245,HG00257,HG00313,HG00328,HG00265,NA07357,HG00280,NA12275,HG00375,NA11830,HG00142,HG00157,HG00309,NA11894,HG00373,NA11930,NA19197,HG00321,NA06986,NA12751,NA12399,NA20588…	83	1	1	1
	1	9149101	AtoG	-	HG00251,HG00183,NA06986,HG00117,NA12058,HG00323,NA12751,NA07347,NA12889,NA11930,HG00182,HG00142,HG00149,HG00234,HG00315,HG00365,HG00334,NA20524	18	1	0	1
	1	9149114	AtoG	-	HG00133,NA20582,HG00365,HG00362,NA19213,HG00285,NA12286,NA19256,HG00358,HG00131,HG00373,NA12058,NA06984,NA12400,NA19146,NA12751,HG00097,NA11894,HG00154,NA20530,HG00306,HG00324	22	1	0	1
	1	9149124	AtoG	-	NA20828,NA20528,NA07357	3	1	0	1
	1	9149136	AtoG	-	HG00158,HG00280,HG00266,NA20814,HG00178,NA12751,NA19197,NA06984,NA19116,NA07048,NA19131,HG00117,NA20785,NA20527,NA12156,NA20773,HG00306,HG00277,NA12340,HG00364,HG00265,NA12341,NA19107,HG00105,NA12716,HG00268,NA12275,HG00257,NA20512,HG00097,NA19098,HG00234,NA20765,HG00321,HG00332,HG00313,HG00325,NA20531,NA20588,NA12874,NA12813,NA12234,NA19204,HG00245,NA19213,NA11894,NA12282,HG00236,HG00365,NA18912…	151	1	1	1
	1	9149153	AtoG	-	HG00133,HG00117,NA12347,NA20530,NA18873,HG00119,NA20804,NA18912,HG00178,HG00384,NA12286,NA20539,NA12399,HG00157,HG00331,NA19256,HG00234,HG00183,HG00311,NA12889,HG00236,HG00321,NA19149,NA20772,NA20819,NA11930,NA20515,NA11894,HG00362,HG00343,NA12751,HG00112,NA12156,NA18498,NA20527,HG00106,HG00262,NA19129,HG00332,NA06986,HG00285,HG00361,HG00246,NA19206,HG00306,HG00097,HG00325,HG00187,NA11931,HG00280…	77	1	1	1
	1	9149184	AtoG	-	HG00097,NA12340,HG00369,HG00313,HG00119,NA12716,HG00332,HG00158,HG00250,HG00266,NA20531,HG00271,NA12275,NA19147,HG00187,NA19197,HG00373,NA12776,HG00344,HG00342,NA06984,HG00361,HG00142,NA11829,NA19118,NA20771,HG00328,HG00146,NA19131,NA18498,HG00117,NA20796,NA07357,HG00138,NA19146,HG00365,NA20515,HG00331,NA20760,NA07347,NA12874,NA19129,HG00358,NA12546,NA20524,HG00251,NA20785,NA11894,NA20518,NA20759…	143	1	1	1
	1	9149294	AtoG	-	NA19116,HG00245,HG00277,NA20828,HG00375,HG00328,HG00232,NA12829,HG00251,NA11831,NA20588,HG00309,NA20528,NA12763,NA12282,HG00115,HG00361,HG00275,NA19146,NA20507,HG00131,HG00146,NA19098,NA11830,HG00263,HG00373,NA07048,HG00183,HG00117,HG00362,HG00325,NA12813	32	0	0	1
	1	9149328	AtoG	-	NA19160,HG00268,NA12750,HG00306,HG00331,NA20772,NA20543,HG00332,NA19149,NA20761,NA12275,NA11881,NA19257,NA18873,NA12347,NA20771,HG00097,HG00330,NA20786,HG00106,NA19096,HG00344,NA20828,NA19213,HG00339,HG00146,NA20785,HG00255	28	1	0	1
	1	9149333	AtoG	-	HG00157,HG00130,HG00097	3	0	0	0
	1	9149349	AtoG	-	NA12347,NA19213,NA20588	3	0	0	0
	1	9149367	AtoG	-	HG00306,HG00233,NA20771	3	1	0	1
	1	9149376	AtoG	-	NA18870,NA20539,HG00257,HG00142,NA12400,NA19130,NA07056,NA11994,HG00157,HG00356,NA12546,HG00102,NA12829,NA20507,NA12812,HG00109,NA20517,HG00362,NA19160,HG02215,NA20532,NA06986,NA12762,NA20502,HG00245,NA19257,HG00100,NA20772,NA19149,NA12275,NA11920,HG00255,HG00181,NA06989,HG00251,HG00268,NA07347,HG00324,NA20528,HG00309,NA12763,HG00315,NA10847,NA11832,NA12341,HG00328,HG00154,HG00183,NA20828,NA18923…	215	1	1	1
	1	9149390	AtoG	-	HG00262,NA20524,NA20513,HG00365,NA20759,NA19099,HG00373,HG00146,NA19129,NA20800,NA20519,NA20507,NA20814,NA11930,HG00240,NA20502,NA07048,HG00112,NA12751,NA20808,NA19108,NA18510,NA20521,HG00133,NA19141,NA20796,NA19098,NA20531,HG00244,NA19147,HG00187,NA12889,NA20812,HG00117,HG00330,NA12340,NA19257,HG00313,HG00100,HG00344,HG00119,NA19118,NA12282,NA20543,HG00272,HG00366,HG00183,NA19160,NA20517,HG00142…	183	1	1	1
	1	9149398	AtoG	-	HG00272,NA20814,HG00240,NA07048,HG00238,NA19108,HG00325,HG00106,HG00150,NA12751,NA19257,HG00344,HG00119,NA20543,NA18489,NA20524,NA20539,HG00365,NA12829,NA18870,NA20772,NA12761,NA11829,HG00337,NA12400,HG00137,NA19256,HG00277,NA20512,HG01791,NA12058,HG00234,HG00139,NA12399,HG00321,NA19146,HG00262,HG00251,NA12763,HG00356,HG00154,NA19223,NA20752,NA06989,HG00315,HG00237,HG00268,HG00369,NA12889,NA12340…	149	1	1	1
	1	9149404	AtoG	-	NA12286,HG00306,NA20532,NA06986,HG00262,HG00373,HG00384,HG00365,NA19143,NA20530,NA07056,NA12760,NA12058,NA18923,NA12829,NA12763,NA12761,NA20519,NA20585,NA19095,HG00154,HG00369,HG00237,NA12762,NA20828,NA12843,HG00311,NA12156,NA20759,NA19116,NA20812,HG00131,NA19098,NA20810,NA12750,HG00133,HG00114,NA19129,NA20513,HG00330,NA20514,HG00315,HG00358,NA18489,HG00321,HG00256,HG00366,HG00183,NA20765,NA11829…	74	1	1	1
	1	9149406	AtoG	-	HG00369,NA12058,HG00324	3	1	1	1
	1	9149410	AtoG	-	HG00356,NA18486,HG02215,NA20530,NA20828,HG00384,HG00100,HG00182,HG00375,NA20785,NA19118,NA19198,NA20761,NA12156,HG00142,HG00250,NA20811,NA19225,NA11831,HG01791,NA12400,NA20515,NA18873,NA20810,NA19256,NA12761,HG00306,HG00265,NA19130,NA07048,NA12812,HG00369,NA19146,HG00263,NA12751,NA20527,HG00137,NA19141,NA12814,NA12058,NA20752,HG00112,NA12889,NA06986,HG00325,NA19129,HG00119,HG00365,NA12340,HG00109…	73	1	1	1
	1	9149414	AtoG	-	NA18489,HG00245,NA12874,NA20797,NA12275,NA19121,HG00234,HG00117,NA06984,HG01791,NA07347,NA20754,NA12286,NA18916,NA18510,HG00114,HG00133,NA19147,NA12751,HG00244,HG00158,NA11994,NA12763,HG00344,NA19149,NA18923,NA19130,NA19206,HG00356,NA12760,NA20752,HG00315,NA07056,NA20530,HG00346,HG00272,NA12282,NA20814,HG00139,HG00332,HG00277,HG00187,HG00382,NA12399,NA12287,HG00262,HG00251,NA19223,HG00324,NA20812…	180	1	1	1
	1	9149418	AtoG	-	NA20828,NA18489,NA20517	3	1	0	1
	1	9149419	AtoG	-	HG00375,HG00376,HG00133,NA20807,NA19223,NA19131,NA20521,NA12843	8	1	0	1
	1	9149420	AtoG	-	HG00119,NA20530,NA12340,HG00372,HG00306,NA12763	6	1	0	1
	1	9149423	AtoG	-	HG00137,HG00183,HG00257,HG00344,NA20512,NA19118,HG00369,NA12843,NA12058,NA20814,HG00127,NA20765,HG00339,NA20530,HG00306	15	1	0	1
	1	9149429	AtoG	-	HG00326,NA12829,NA20513,NA20512,HG00158,NA12156,HG00238,NA20519,HG00233,NA12814,HG00384,HG00122,HG00118,NA12749,NA19130,NA12400,NA19206,HG00119,HG01334,NA19129,HG00097,HG01791,HG00129,NA11830,HG00306,HG00325,NA12889,NA19108,NA06984,NA20800,HG00313,NA20531,NA12762,HG00277,NA12399,NA20530,NA19121,HG00373,HG00342,NA12058,NA07048,HG00332,HG00137,HG00344,NA19095,HG00154,NA19131,NA12286,HG00366,NA20772…	51	1	1	1
	1	9149430	AtoG	-	NA12282,NA12812,HG00137,HG00375,NA12751,NA18916,NA07048	7	1	0	1
	1	9149432	AtoG	-	NA19223,NA19131,HG00157,HG00133,NA20800,NA12282,NA18912,NA20768,HG00232,NA07048,NA12829,NA06984,HG00130,NA12763,HG00365,HG00313,NA20519,HG00183,NA20828,HG00096,HG00112,NA12275,NA19107,HG00256,NA06986,HG00110,NA20543,HG00171,HG00102,NA20515,HG01791	31	1	1	1
	1	9149461	AtoG	-	HG00263,HG00256,NA20808,HG00146,HG00344,HG00342,HG00365,NA12287,HG00382,HG00272,HG00102,HG00321,NA12399,NA20527,NA12829,NA12400,NA20538,NA20765,NA20521,NA20812,NA11831,HG00345,NA19096,HG00384,HG00361,HG00119,HG00366,NA12340,NA10847,NA12889,NA20507	31	1	1	1
	1	9149464	AtoG	-	NA19121,HG00233,HG00110,NA11920,NA12760,HG00171,NA20530,NA19206,NA12761,NA18923,HG00255,HG00250,NA10847,HG00232,HG00257,NA20517,HG00142,NA12829,NA19098,NA20539,HG01334,HG00182,HG00256,NA11994,NA12814,NA12763,NA18486,HG00356,NA20529,NA20752,HG00346,HG00129,NA19131,NA07056,HG00331,HG00343,NA12873,HG00369,NA19143,NA07051,HG00315,NA12347,HG00096,HG00323,HG00271,HG00150,NA19189,HG00237,NA20535,NA12843…	198	1	1	1
	1	9149501	AtoG	-	NA20828,NA19147,NA06989,NA20518,NA20768,NA12889,HG00187,NA19213,NA11920,NA19236,NA20806,NA11881,NA12287,NA12829,HG00119,HG00342,HG00362,HG00345,NA12751,NA12778,HG00133,HG00306,NA12874,HG00100,HG00097,HG00280,HG00361,HG00339,NA19099,NA12843,HG00233,HG00158,NA12762,NA19131,HG00332,NA20521,NA12546,HG00266,NA12282,NA20538,NA12341,NA06986,NA20502,NA18923,HG00268,HG00146,HG00324,NA19256,NA20515,NA12400…	80	1	1	1
	1	9149509	AtoG	-	HG00187,HG00280,NA19118,HG00345,HG00255,NA19204,NA19147,HG00157,HG00275,HG00115,NA19098	11	1	0	1
	1	9149510	AtoG	-	NA20515,HG00133,NA20754,HG00146,NA12749,NA20517,HG00309,HG00328,HG00373	9	1	0	1
	1	9149528	AtoG	-	NA20521,HG00356,HG00130,NA12282,NA19121,HG00331,NA12287,HG00100,NA19172,NA20761,HG00187,NA20796,NA20785,NA12763,NA19107,NA20524,HG00102,NA19093,HG00112,HG00345,NA19108,HG00328,NA12751,NA20539,HG00114,NA20528,HG00343,NA19095,HG00149,NA12546,HG00362,HG00240,HG00272,NA11930,NA12762,HG00342,HG00344,NA18870,HG00158,HG00346,NA20543,NA19225,HG00244,HG01334,HG00119,HG00268,HG00146,NA20532,NA12154,NA11830…	176	1	1	1
	1	9186197	AtoG	+	NA06986,HG00117	2	1	1	1
	1	9186211	AtoG	+	NA06986,HG00117	2	1	1	1
	1	9191810	AtoG	-	HG00157,NA11881,NA11832	3	0	0	0
	1	9264611	AtoG	+	HG00237,NA07000,NA11930,NA12144,NA18508,NA20503	6	0	0	0
	1	9265677	AtoG	+	HG00258,NA20807	2	1	0	1
	1	9265684	AtoG	+	HG00258,NA12234,NA18870,NA19197,NA18917,NA12761,NA19147,NA18909,NA19198,NA18499,NA19093,HG00343,NA19118,HG00110,NA12829	15	1	0	1
	1	9265694	AtoG	+	NA12829,NA19197	2	0	0	1
	1	9265715	AtoG	+	HG00338,NA12778,NA19210	3	1	0	1
	1	9265728	AtoG	+	NA18499,NA11892,HG00338,NA12383,NA19093,NA12778,NA19210,NA19118,NA18917,NA20800,NA19197,HG00323,NA19198,HG00373,HG00138,NA12275,NA18870,NA11930	18	1	0	1
	1	9265729	AtoG	+	HG00246,NA18933,NA20771,HG00375,NA12341,HG00336,NA19149,NA18923,NA20798,HG00325,NA20506,NA19225,HG00383,HG00356,NA12873,NA12761,NA19107,HG00096,HG00331,NA12763,HG00323,NA07051,HG00112,HG00313,NA19198,NA20752,HG00315,NA18912,HG00235,HG00343,NA19114,HG00114,NA20792,HG00365,HG00272,HG00126,NA12383,NA19257,NA12778,NA19222,NA20589,NA19146,NA18499,NA20509,NA19189,NA12154,HG00277,HG00137,HG00141,HG00349…	200	1	0	1
	1	9265733	AtoG	+	NA19118,HG00258,HG00343,NA20807	4	0	0	1
	1	9265746	AtoG	+	NA20800,NA18499,NA12275,NA12761,HG00138,HG00343,NA19118,HG00110,NA12383,NA18917,NA19147,HG00323,NA11892,NA18909	14	1	0	1
	1	9266895	AtoG	+	NA20796,HG00246,HG00378,HG00130,NA19107,NA12400,NA19256,HG00280,NA19114,NA12489,NA10847,HG00106,NA20766,HG00258,NA07000,NA12827,NA19129,NA12383,HG00146,NA19093,NA12813,HG00278,NA18933,NA20807,NA12058,HG02215,NA19108,NA18511,NA20761,NA20752,HG00182,NA12843,HG00255,HG00233,NA20541,NA18861,NA12775,HG00189,NA18508,NA19185,NA12287,NA18923,HG00180,HG00335,HG00332,NA12546,HG00274,NA19095,HG00343,NA12874…	177	1	0	1
	1	9266898	AtoG	+	HG00258,NA19130,NA18489,NA20814,HG00346,NA11994,NA07048,NA11832,HG00383,HG00110,NA20588,NA19137,HG00187,NA19143,NA12874,NA19121,NA18916,HG00274,HG00139,NA18498,NA20800,NA19171,NA20797,NA19147,NA12383,NA19114,HG00126,HG00379,NA11829,NA20508,NA18909,HG00326,HG00345,HG00138,NA20528,HG00242,NA18502,NA11930,NA20589,NA12006,HG00143,NA20538,NA20801,NA07051,NA20803,NA20513,NA19235,NA18917,HG00278,NA20543…	218	1	1	1
	1	9266900	AtoG	+	HG00332,HG00349,HG02215,NA20814,NA20773,NA19098,NA07000,HG00121,HG00128,HG00365,NA12890	11	1	0	1
	1	9266901	AtoG	+	NA11829,HG00379,NA20792,NA19184,HG00345,HG00271,HG00121,NA19096,NA20766,NA12778,NA20586,NA20503,HG00338,NA20819,NA12813,NA19095,NA20771,NA12234,NA20811,NA12762,HG00235,HG00278,NA12829,HG00187,NA11832,HG00105,NA12761,NA20765,NA19172,NA19225,HG00366,HG00146,NA20505,NA19118,NA12005,NA20801,NA20538,NA12006,NA18502,NA20528,HG00326,NA18489,HG01334,HG00339,NA11930,NA19152,NA10847,NA12155,NA20527,HG00131…	170	1	1	1
	1	9266924	AtoG	+	NA19206,HG00262,NA20589,NA12347,HG00096,HG00323,HG00097,NA20765,NA19172,HG00265,NA12776,NA07347,HG00128,HG00280,HG00142,NA20518,NA19095,HG00349,NA12006,HG00246,NA20771,NA19197,HG00138,HG00324,NA12249,NA19098,NA11829,HG00281,NA19107,NA19184,NA20517,HG00266,NA12341,NA20504,HG00258,NA19149,NA20541,HG00126,HG00242,HG00137,NA19130,NA19190,NA07051,HG00365,HG00309,HG00255,NA07048,NA12813,NA19108,HG00121…	118	1	0	1
	1	9266937	AtoG	+	NA12347,NA19102,NA19210,NA20541,NA19129,NA19096,NA18933,NA12400,NA20528,NA18912,NA20771,HG00343,HG00237,NA19153,HG00371,NA07048,NA19172,NA12843,NA18486	19	0	0	1
	1	9266938	AtoG	+	NA19207,NA20814,NA18917,NA19206,NA20800,NA20542,NA12347,NA18909,NA07051,NA20508,NA19149,NA12341,NA12399,HG00285,HG00309,NA11840,NA19093,HG00097,HG00320,NA07347,NA12890,HG00142,NA20540,HG00112,NA20519,NA20757,HG00246,HG00126,HG00114,HG00365,NA20589,NA12827,NA19190,NA18916,NA12750,HG00252,NA20769,NA20504,NA19213,NA18870,NA20796,HG00281,NA20811,NA12234,HG00324,NA12546,HG00250,NA12778,NA19095,NA12400…	139	1	1	1
	1	9266950	AtoG	+	NA12813,NA11994,NA20505,HG00278,NA19121,HG00320,HG00271	7	1	0	1
	1	9267000	AtoG	+	NA19137,NA07347,NA12760,NA19107,NA20504	5	1	0	1
	1	9267003	AtoG	+	HG02215,NA19117,HG00326,HG00185,NA12890,NA19114,NA12234,NA19096,NA19098,NA19113,NA20761,NA18502,HG00117,NA18873,NA12546,HG00237,HG00116,NA18861,NA18489,NA19129,HG00328,NA19130,NA18508,NA19137,NA20505,NA20504,HG00131,HG00105,NA20811,NA19207,HG00187,HG00138,NA19257,NA07347,NA20796,HG00309,NA12006,HG00349,NA19118,NA12399,NA20765,HG00238,NA19189,NA07051,HG00097,NA19213,NA19184,NA20773,NA20803	49	1	0	1
	1	9267020	AtoG	+	NA07051,NA20505,NA18486,NA20761	4	1	0	1
	1	9267029	AtoG	+	NA11894,NA19213,NA20504,HG00373,NA18912,NA20803,NA20797,NA19137	8	1	0	1
	1	9267049	AtoG	+	NA12234,NA19189,HG00252,NA19118,NA12399	5	1	0	1
	1	9267054	AtoG	+	NA18861,NA20504,NA12399,NA19189,HG00252,HG00378,NA19096	7	1	0	1
	1	9267072	AtoG	+	NA18909,NA12760,NA19114,NA20761,NA19113	5	1	0	1
	1	9267081	AtoG	+	NA19213,NA18502,HG00116,NA19096,HG00252,NA20504,NA18912,NA19114,NA11894,HG00373,NA20797,NA19184,NA19129,NA20761,NA12778	15	1	0	1
	1	9267082	AtoG	+	NA19117,NA11894,HG01334,NA12006,HG00252,NA19189	6	1	0	1
	1	9267094	AtoG	+	NA20757,NA18912,HG01334,HG00105,NA12399	5	1	0	1
	1	9267968	AtoG	+	HG00114,NA07347,NA19117,HG00127,NA20800,NA12761,HG00261,NA19118,HG00138,HG00148,NA19113,NA12058,NA20797,NA20502,NA18917,NA20515,NA06985,NA12383,HG00280,NA19143,NA19256,HG00379,NA12347,HG00326,NA20513,HG00364,NA12234,NA20773,HG00324,HG00356,NA18934,HG00110,NA19201,HG00330,NA18510,NA20524,HG01334,NA18508,NA12842,HG00373,HG00328,NA10847,NA12287,HG00154,HG00253,HG00343,HG00131,NA19141,NA12814,NA19131…	54	1	1	1
	1	9267987	AtoG	+	HG00131,NA19138,NA18873,NA12842,HG00100,HG00326,NA20513,HG00330,NA12762,NA20773,NA18934,NA07347,NA19113,HG00154,NA19171,NA12814,NA20515,NA12058,NA20812,HG00111,NA20503,NA18933,NA19256,NA12761,HG00110,NA19117,HG00261,NA19118,HG00343,NA19131,NA12044,NA19141,HG00379,HG00138,HG00277,HG00114,HG00384,HG00132,NA20502,NA19137,NA20524,HG00328,NA19143,HG00139,NA18508,HG01334,NA12347,NA18510,HG00280	49	1	1	1
	1	9267988	AtoG	+	HG00131,NA19141,HG00114,NA20773,NA19131,NA12762,HG00110,NA12383,NA12234,HG00343,NA19117,HG00261,NA20502,NA19201,NA07048,NA18917,HG00328,NA20505,NA19118,NA12814,NA20812,NA18934,HG00379,HG00138,HG00139,NA19138,NA18508,NA12761,NA19137,NA07347,NA20513,NA20797,NA19171,NA19113,NA12058,HG00324,NA19256	37	1	0	1
	1	9267999	AtoG	+	NA20812,NA20773,HG00373,NA18510	4	1	0	1
	1	9268010	AtoG	+	HG00328,NA12814,HG00114,NA12383,NA12761,HG00127	6	1	1	1
	1	9268015	AtoG	+	NA18933,NA19113,NA12058,HG00148,HG00384,HG00328,NA12234,HG00373,NA12761,NA19143,HG00261,NA19131,NA19118,NA18934,NA12814,HG00139,NA18873,NA12347,HG01334,NA18510,HG00280,HG00379	22	1	1	1
	1	9268023	AtoG	+	NA19141,HG00274,HG00131,HG00114,NA18933,NA19171,NA12761,NA12058,NA19113,NA19118,NA07048,NA12234	12	1	1	1
	1	9268033	AtoG	+	NA20800,NA07347,HG00261,HG00253,HG00379,NA12762,NA19131,HG00343,HG00127,NA12347,NA12761,HG00148,HG00139,HG00356,NA19117,HG00114,HG01334,NA18933,HG00373,NA12814,HG00111,HG00110,NA12058,HG00136,NA19143,NA19138,NA18873,NA19141,NA19113,HG00138,NA19118,HG00328,HG00326,NA20797,NA10847,NA19137,NA20515	37	1	1	1
	1	9268035	AtoG	+	HG00100,NA20513	2	1	0	1
	1	9268036	AtoG	+	NA19113,NA12347,NA12762,HG00364,NA12842,NA19137,HG00261,HG01334,NA19141,NA19171,NA07347,NA12044,HG00132,HG00373,NA19118,NA20531,HG00114,NA20515	18	1	0	1
	1	9268043	AtoG	+	NA19137,NA07048,HG00326,HG00138,NA19118,HG00324,NA20531,NA20812,NA12814,NA12778,HG00384,NA19113,NA20524,HG00111,NA20513,NA18917,NA19143,HG00344,NA20505,NA12842,HG00148,HG01334,HG00274,HG00154,NA12058,HG00122,NA18873,NA12347,NA18933,HG00114,HG00139,NA19171,NA18508,HG00364,NA12234,NA10847,NA20797,HG00356,NA20773,NA20515,HG00132,NA12761,HG00127,NA12340,HG00328,HG00136,NA19256,HG00261,NA18510,HG00131…	74	1	1	1
	1	9268044	AtoG	+	NA18508,HG00373,NA19138,HG00379,HG01334,HG00148,NA19131,HG00360,NA07347,NA18934,HG00114,NA19118,HG00364,HG00251,NA19149,NA12814,HG00328,NA20531,HG00110,NA06985,NA19141,NA19113,NA18933,NA19171,NA20773,NA20513,NA12347,HG00154,HG00132,NA19143,NA12234,NA19137	32	1	1	1
	1	9268047	AtoG	+	HG00110,HG00373,NA12814,HG00131,HG00100,NA19137,HG00138,NA19131,HG00277,HG00136,NA18873,HG00127,NA10847,HG00154,HG00139,HG00330,HG01334,HG00114,HG00280,NA12058,HG00122	21	1	1	1
	1	9268061	AtoG	+	NA12762,HG00138,HG00274,HG00384,HG00343,HG00277,NA19131,NA07347,NA19149,NA12044,HG00253,NA19117,NA19256,HG00373,HG00344,HG00131,HG00261,NA20503,HG01334,NA20515,NA20513,HG00114,NA18508,NA20524,NA19143,NA20531,NA19118,NA10847,NA20797,HG00111,NA12814,NA07048,NA12234,HG00326,NA12287,NA20812,HG00251,HG00110,NA19138,HG00100,HG00379,NA06985,NA19201,NA18934,HG00150,HG00364,NA12842,NA19113,NA18873,HG00330…	73	1	1	1
	1	9268072	AtoG	+	HG00277,NA12842,NA12287,NA18510,HG00139,HG02215,NA12761,HG00379,NA18873,HG00371,NA07048,HG00280	12	1	0	1
	1	9268128	AtoG	+	NA19171,NA20513,NA06985,HG00367,HG00343,NA07347,NA12778,NA12287,NA12814,HG00373,HG00132,NA18508,NA20819	13	1	1	1
	1	9268141	AtoG	+	NA07048,NA07347,NA19131,NA18508,NA06985,HG00343,NA20774,HG00138,NA12762,NA12761,NA18934,HG00122,NA12383,HG00371,NA19143,NA19118,HG00110,NA12273,NA12812,NA06984,NA12778,HG00324,HG00139,NA20505,HG00328,HG00131,HG00258,NA12058,NA12347,NA19113,HG00344,HG00373,NA19171,NA12842	34	1	1	1
	1	9268154	AtoG	+	NA18873,NA12282,NA12347,NA20772,HG00274,HG00323,HG00341,NA12762,HG00258,NA20521,NA11992,NA19235,NA18934,HG00138,NA07347,NA19131,NA19149,NA06984,NA20541,NA20797,HG00150,HG00115,NA12273,HG00324,NA20585,HG00179,NA18917,NA12778,NA20773,HG00371,NA20586,HG00122,HG00280,NA19113,HG00379,NA20524,HG00100,NA20800,NA18933,NA19141,NA18510,HG00127,NA19171,NA12058,NA20503,HG00131,NA12761,NA20532,HG00148,HG00367…	71	1	1	1
	1	9268159	AtoG	+	HG00277,HG00323,HG00179,HG00344,NA19118,HG00111,NA12234	7	1	0	1
	1	9268164	AtoG	+	NA07048,NA18933,NA12058,HG00277,NA20797,HG00284,NA19171,HG00326,NA19235,NA06984,NA07347,NA12347,HG00367,NA19149,NA19131,NA19141,NA06985,NA20765,NA18873,HG00373,NA19113,NA20800,NA20542,HG00280,NA20541,HG00328,NA12340,NA07056,NA12716,NA19117,NA20773,NA12273,NA20503,NA12761,NA20524,HG00189,HG00115,NA12842,NA20582,HG00179,NA20812,NA20802,NA20505,NA20585,HG00344,HG00258,HG00131,NA19256,NA20532,NA12044…	100	1	1	1
	1	9268180	AtoG	+	HG00343,NA12347	2	1	0	1
	1	9268183	AtoG	+	HG00179,NA12716,HG00274,NA19131,HG00131,NA20797,NA20582,NA20532,HG00328,NA19149,NA06984,HG00132,NA20505,NA12761,NA20765,HG00324,HG00189,HG00284,NA19256,NA19171,NA20513,NA06985,HG00115,NA19141,HG00277,NA19137,HG00356,NA19153,NA19138,NA18873,NA19143,NA19118,NA12814,NA20800,NA20542,HG00148,HG00127,HG00379,HG00371,HG00384,NA12762,NA20772,HG00110,HG00343,HG02215,HG00139,NA11992,NA20586,HG00125,NA20585…	100	1	1	1
	1	9268184	AtoG	+	NA19113,NA07347,NA20797,HG00132,NA12716,NA20505,HG00179,NA20585,HG00379,NA20773,HG00114,NA12282,NA18933,HG00125,NA12249,NA20582,NA19141,NA12762,HG00384,NA12812,HG00373,HG00277,NA19137,HG00371,NA19118,NA11992,HG00131,HG00324,HG00127,NA19201,NA12340,NA19149,NA20503,NA12761,HG00122,NA12058,NA20586,NA20765,HG00364,HG00328,NA20521,NA12273,NA20532,HG00360,NA19131,NA06984,NA12383,HG00274,NA20524,NA18873…	99	1	1	1
	1	9268196	AtoG	+	NA20765,NA11992,NA19138,NA10847,NA12340,NA12842,HG00127,HG00343,NA18873,NA12287,NA19113,NA19131,NA19143,NA06984,NA20812,HG00371,HG00379,HG00328,HG00131,NA19118,NA20521,HG00330,NA20524,NA12778	24	1	0	1
	1	9268227	AtoG	+	HG00138,HG00132	2	1	0	1
	1	9268234	AtoG	+	NA20800,NA19113,NA07347,NA12716,HG00343,NA19171,HG01334,NA19138,NA20765,NA19118	10	0	0	1
	1	9270965	AtoG	+	NA07048,NA12341,NA11831,HG00258,HG00159,NA12761,NA20527,HG00188,NA12347,NA20812,NA20524,HG00131,HG00326,HG00100,HG00183,HG00233,NA20757,HG00315,HG00350,HG00277,NA20796,NA19207,NA20539,HG00320,HG00378,NA12383,HG00181,NA12842,HG00331,NA10847,NA12813,NA20800,NA11881,NA20538,NA20772,HG00129,NA20543,HG00310,HG00110,NA12873,NA06989,NA20752,HG00324,HG00325	44	1	0	1
	1	9271016	AtoG	+	NA19129,HG00350,HG00255,NA12761,HG00371,HG00122,HG00125,HG00233,NA20804,HG00364,HG00346,NA12347,NA19118,HG00378,HG00171,HG00174,NA18908,NA19235,HG00325,NA20803,NA20589,HG00336,HG00244,NA12842,HG02215,NA10847,NA19141,NA20543,NA19095,HG00343,NA12155,HG01790,NA20785,HG00284,HG00383,NA12814,NA18870,NA20513,HG00132,HG00231,HG00372,HG00360,HG00351,HG00173,NA19185,HG00178,NA20797,HG00344,NA19236,NA19146…	176	1	1	1
	1	9271022	AtoG	+	HG00121,NA12843,NA12717,HG00171,HG00371,HG00310,NA20543,NA19210,NA12776,HG00346,NA20796,HG00233,HG00097,NA12341,NA12778,NA19138,HG00343,NA18519,HG00350,HG00280,HG00372	21	1	0	1
	1	9271035	AtoG	+	HG00384,HG00125,NA12775,NA20773,NA20585,NA06989,HG00231,NA07051,HG00139,NA18517,NA18519,NA12829,HG00180,HG00345,NA20525,NA12873,NA18870,HG01334,HG00272,NA12154,NA20541,HG00383,NA20517,HG02215,NA12751,HG00364,NA12776,HG00310,NA20528,NA12814,HG00376,HG00097,NA20544,HG00378,HG00118,HG00171,NA20527,NA19235,NA20785,NA12155,HG00330,HG00110,NA12760,NA07056,HG00160,HG00344,NA18520,NA19236,NA12762,NA20539…	200	1	1	1
	1	9271041	AtoG	+	NA12843,NA12413,HG00338,NA19129,HG00231,HG00342,NA20521,HG00264,HG00189,HG00335,NA20589,NA12775,HG00182,HG00262,HG00108,HG00121,NA19141,HG00331,NA07048,HG00125,NA20525,NA19172,HG00097,HG00367,NA20802,HG00349,NA12341,NA20826,NA20536,NA19210,NA20792,NA11930,HG00122,NA12778,NA20757,NA20543,HG00246,HG00350	38	1	0	1
	1	9271042	AtoG	+	HG00155,HG00138,NA19138,NA20769,HG00383,NA11930,NA20766,HG00378,NA19102,NA20503,HG00253,NA19129,HG00255,NA20773,HG00233,HG00137,HG00121,NA19131,HG00336,NA20535,NA20513,HG00139,HG00335,NA19185,NA19098,NA20521,HG00159,NA12873,NA19236,NA20505,NA12761,HG00110,NA20808,NA19149,NA20506,NA12843,NA20812,HG00342,NA20768,NA20772,HG00108,HG00330,NA19099,NA11831,NA12814,NA20532,NA19117,HG00188,NA19144,NA12006…	214	0	1	1
	1	9271059	AtoG	+	NA19137,NA19235,NA19118,NA11881,HG00326,HG00097,HG00315,HG00351,NA20503,NA18934,NA20796,NA20506,HG00384,NA18517,NA12155,HG00281,NA06989,NA18870,NA20505,HG00188,NA20768,NA19113,NA12154,HG00108,NA07048,NA20808,NA07056,HG00189,NA20797,HG00114,NA12762,HG00277,NA11894,HG00379,NA12006,HG01334,NA20752,NA19117,NA12775,HG00372	40	1	0	1
	1	9271071	AtoG	+	NA20796,NA20766,NA20504,NA20543,NA20826,NA12383,HG00097,NA19117,NA12814,NA12006,HG00136,NA20802,HG01790,NA19138,HG00328,NA20502,NA20532,HG00246,HG00346,HG00173,NA12763,NA12776,HG00188,NA12762,HG00125,NA20768,NA20538,HG00114,NA19149,HG00379,HG00331,HG00233,HG00121,NA20797,HG00284,HG00127,NA20544,NA20792,HG00131,HG00344,HG00281,NA20803,HG00325,NA12234,HG00176,NA12830,NA12413,HG00327,NA12347,HG00250…	117	1	1	1
	1	9271114	AtoG	+	NA19099,HG00326,NA19118,HG00233,NA12347,HG00122,HG00353,HG00264,HG00110,NA19117,NA20539,HG00280,HG00284,NA07347,NA20803,NA20540	16	1	0	1
	1	9271117	AtoG	+	NA20504,NA19095,NA20539,HG00344,HG00121,NA18486,HG00120,NA12842,NA20521,NA20535,NA12760,HG00373,NA12751,HG00244,HG00258,NA12005,NA19118,HG00180,NA18517,HG00178,HG00364,HG00110,NA20812,NA12843,HG00233,HG00325,NA20506,HG00171,NA20772,HG00138,HG00139,NA18934,HG00366,NA19146,NA11930,NA12341,NA12383,NA19144,HG01334,NA12006,HG00350,NA20585,NA12155,NA19225,NA12778,HG00351,HG00349,HG00246,HG00262,NA20797…	80	1	0	1
	1	9271119	AtoG	+	NA07051,HG00349,NA12814,NA20543,HG00243,HG01334,NA19118,NA20826,HG00325	9	1	0	1
	1	9271125	AtoG	+	HG00155,HG00373,NA12813	3	1	0	1
	1	9271131	AtoG	+	NA18908,NA19236,NA19143	3	0	0	0
	1	9271134	AtoG	+	HG00331,NA12751,NA20752,NA19143,NA12778,HG00233,NA20800,NA20527,HG01334,HG00262,HG00353,NA19144,NA20544	13	1	0	1
	1	9271143	AtoG	+	NA20800,NA07051,HG00315,NA19256,HG00277,NA20797,NA19131,NA12751,HG00384,NA20802,NA19095,HG00097,HG00139,NA11930,HG00328	15	1	0	1
	1	9271168	AtoG	+	HG00346,NA12843,NA19099,HG00277,NA19141,NA20812,HG00111,HG00325,NA20768,NA18486,HG00264,NA11831,NA20772,NA11893,NA12761,NA07347,NA19143,HG00338,NA12760,NA12763,NA20752,NA12006,HG00122,HG00233,HG00315,NA20535,NA12751,NA07048,NA20543,NA12813,NA12829,NA19144,HG00331,NA20792,NA20527,NA20539,HG00262,HG00100,NA12154,HG00343,NA11894,HG00326,NA20803,NA20800,NA12341	45	1	0	1
	1	9271173	AtoG	+	NA19099,NA12829	2	0	0	1
	1	9271195	AtoG	+	NA12778,NA20752,NA12763,NA12814,NA20768,NA18517,HG00120,NA18486,NA12842,NA19144,HG00258,NA11831,NA20792,NA12347,NA20585,HG00131,NA20543,NA20527,HG00364,NA20803,NA20539,NA18510,HG00159,HG00122,HG00325,NA18934,HG00326,NA12154,NA07051,NA11894,NA12760,NA20800,NA12341,HG00343,NA12751,HG00331,HG00233,HG00277,HG00114,NA19099,NA19143,NA20544,HG00264,NA19131,HG00315,NA20812,HG00244,HG00349,NA20521,NA07048…	70	1	0	1
	1	9271196	AtoG	+	NA19118,NA19143,HG00343,NA12006,NA20527,NA12778,NA20803,HG00364,NA19099,HG00338,NA12760,NA12813,HG00097,HG00138,HG00326,HG00351,NA20543,HG00131,HG00120,NA11831	20	1	0	1
	1	9271208	AtoG	+	NA12814,NA18510,NA20543,NA12763,NA20752,NA18486,HG00233	7	1	0	1
	1	9582969	AtoG	+	HG00117,NA06986	2	1	0	1
	1	9582970	AtoG	+	HG00117,NA19095,NA06986	3	1	0	1
	1	9582986	AtoG	+	NA06986,HG00117	2	1	0	1
	1	9582996	AtoG	+	NA20527,NA06986,HG00117,NA19095,NA12716	5	1	0	1
	1	9583047	AtoG	+	NA20527,NA19095	2	1	0	1
	1	9583048	AtoG	+	HG00117,NA20527,NA19095,NA12716	4	1	0	1
	1	9583049	AtoG	+	NA19095,NA06986,NA20527,NA12716,HG00117	5	1	0	1
	1	9583064	AtoG	+	NA19095,NA20527	2	1	0	1
	1	9583096	AtoG	+	NA19248,NA19095,NA12716,NA20527,NA19118,NA06986,HG00117,NA18502	8	1	0	1
	1	9583097	AtoG	+	HG00117,NA06986,NA18502,NA20527,NA19095,NA19118,NA19248	7	1	0	1
	1	9583137	AtoG	+	NA19118,NA19095,NA11893,NA19248,NA18502,HG00117,NA06986	7	1	0	1
	1	9583143	AtoG	+	HG00117,NA19095	2	1	0	1
	1	9583150	AtoG	+	NA19248,HG00117,NA19095,NA12716,NA06986	5	1	0	1
	1	9584461	AtoG	+	NA12716,HG00117,NA06986	3	0	0	1
	1	9584464	AtoG	+	NA12716,NA06986,HG00117	3	1	0	1
	1	9584477	AtoG	+	NA06986,NA12716	2	1	0	1
	1	9584529	AtoG	+	HG00117,NA06986	2	1	0	1
	1	9584541	AtoG	+	NA06986,HG00117	2	1	0	1
	1	9584633	AtoG	+	NA06986,NA20527	2	1	0	1
	1	9584642	AtoG	+	NA19095,NA20527,NA06986	3	1	0	1
	1	9584661	AtoG	+	NA06986,HG00117	2	1	0	1
	1	9584664	AtoG	+	NA19095,NA20527,NA06986	3	1	0	1
	1	9584740	AtoG	+	NA06986,NA20512,NA20527,NA12716,NA19095,HG00105,HG00117	7	1	0	1
	1	9584768	AtoG	+	NA12716,HG00117	2	1	0	1
	1	9584789	AtoG	+	NA20527,HG00117,NA10851,NA06986,NA20509,HG00127,NA11831,HG00105,NA19095,NA20512	10	1	0	1
	1	9584815	AtoG	+	HG00105,NA20509,NA11831,HG00127,NA06986,HG00364,NA19095,NA20527,NA12341	9	1	0	1
	1	9584832	AtoG	+	NA19095,NA10851,HG00117,NA12890,NA20509,NA12341,NA20527,NA06986,NA20538,HG00105,NA20512	11	1	0	1
	1	9584841	AtoG	+	HG00105,HG00117	2	1	0	1
	1	9584854	AtoG	+	NA12716,HG00105,NA19095,NA10851,HG00127	5	1	0	1
	1	9584876	AtoG	+	NA12890,NA12341,NA06986	3	1	0	1
	1	9584907	AtoG	+	HG00105,NA12341	2	1	0	1
	1	9584969	AtoG	+	HG00117,NA12341,NA12890,NA06986	4	1	0	1
	1	9672553	AtoG	-	NA12843,NA12761	2	0	0	0
	1	9680051	AtoG	-	NA20512,NA06986	2	0	0	1
	1	9680106	AtoG	-	NA06986,NA20512	2	0	0	0
	1	9680175	AtoG	-	HG00133,NA19095	2	0	0	0
	1	9680184	AtoG	-	HG00133,NA20512,NA11831,NA19095,NA12761,NA20527,NA06986,NA19116	8	1	1	1
	1	9680248	AtoG	-	NA19159,NA20527,NA19095,NA06986,NA19116	5	0	0	0
	1	9680249	AtoG	-	NA19095,NA20527,NA12761,NA06986,NA19116	5	0	1	0
	1	9680255	AtoG	-	NA06986,NA19095,NA19108,NA19159	4	0	0	0
	1	9680355	AtoG	-	NA20527,NA20797,NA19108,NA19159,NA11994,NA19095,NA06986,NA11893	8	1	0	1
	1	9680367	AtoG	-	NA19159,NA20797,NA20527,NA11994,NA06986	5	1	0	1
	1	9680377	AtoG	-	NA20803,HG00111,NA19108,NA20527,NA19116,NA06986,HG00142,NA19159,NA11893,NA11994,NA19095	11	1	1	1
	1	9680388	AtoG	-	NA19116,NA11893	2	0	0	0
	1	9680392	AtoG	-	NA19108,NA20797	2	1	0	1
	1	9680418	AtoG	-	NA11893,NA19095	2	0	0	0
	1	9680425	AtoG	-	HG00111,NA20527,NA20803,HG00142,NA19116,NA06986,NA19095	7	1	0	1
	1	9680438	AtoG	-	NA19095,HG00111,NA06986,NA20527,HG00142,NA20803	6	1	0	1
	1	9680446	AtoG	-	HG00142,NA11994	2	0	0	0
	1	9729068	AtoG	+	HG00344,NA12842	2	0	0	0
	1	9927325	AtoG	-	HG00237,HG00114,NA12827	3	1	0	1
	1	9927364	AtoG	-	NA11840,NA10851,NA18861,HG00330,HG01791,NA10847,NA18508,NA18498,NA19118,HG00097,HG00328,HG00183,HG00237,HG00236,NA18934,NA12400,NA12234,HG00259,NA19143,NA20543,NA19117,NA11893,HG00338,NA11881,NA12873,NA12827,HG00138	27	1	0	1
	1	9927373	AtoG	-	NA20796,HG00265,NA20772,NA12873,NA20513,NA20543,HG00237	7	1	0	1
	1	9927378	AtoG	-	NA19160,HG00338,NA19143,HG00313,NA20772,HG00133,HG00237,NA20799,NA18916,NA12043,NA12272,NA12763,NA12760,NA06986,NA19095,NA20503,NA11918,NA12827,HG00256,NA12761,NA11893,NA19190,NA12006,NA12383,HG00236,NA18511,NA10851,NA11994,NA19147,NA11992,HG00284,NA19198,NA12889,NA20756,NA12234,HG00131,NA20543,HG00099,NA19092,NA19130,NA19098,NA12873,NA12249,NA20531,NA20586,NA18486,HG00115,HG00142,NA11930,NA12004…	110	1	0	1
	1	9927385	AtoG	-	NA20796,HG00126,NA12340,NA12750,HG00237,NA20756,NA19131,NA12400,HG00328,NA11920,NA20768,HG00284,NA12155,NA20797,HG00234,HG00258,NA12829,NA12272,NA19118,NA18486,HG00097,HG00384,HG00132,NA12760,HG00345,NA12889,NA20513,NA12006	28	1	0	1
	1	9927387	AtoG	-	NA19147,NA07347,NA18520,NA20754,HG00284,NA12155,NA19102,NA19152,NA19131,NA20765,NA18934,NA18508,HG00343,NA18498,HG00234,HG00187,HG00251,NA20539,NA18861,HG00138,NA19099,HG00259,HG00328,NA20588,HG00267,NA20513,NA20802,NA20524,HG00126,HG00183,NA20799,HG00131,NA20756,NA20828,NA18511,NA12873,NA12383,NA20768,HG00378,NA20758,NA12814,NA19236,NA20541,NA11930,HG00157,NA20525,NA12716,NA18923,HG00111,NA12813…	76	1	0	1
	1	9927390	AtoG	-	NA20582,NA19130,HG00110,HG00131,NA19198,NA12762,NA20772,NA11994,HG00258,HG00186,HG00115,HG00284,NA20768,NA18861,NA20799,NA20505,NA11992,NA19214,NA19143,NA20543,HG00145,HG00237,NA11930,NA12716,HG00114,NA12383,HG00236,NA18511,NA20796,HG00365,NA20811,HG00132,NA12234,NA18858,NA20819,HG00378,HG00242,NA19149,NA20541,HG00157,NA19113,NA19248,NA12006,NA12813,NA11840,HG00349,NA20801,NA06986,NA18912,NA19206…	132	1	1	1
	1	9927398	AtoG	-	NA19118,NA12044,NA11994,HG00119,HG00362,NA19172,NA12778,HG00158	8	1	0	1
	1	9927404	AtoG	-	NA07048,NA18498,NA20772,NA12272,NA12234,HG00336	6	1	0	1
	1	9927410	AtoG	-	NA12778,NA18486,NA20771,NA20768,HG00242,NA12814,HG00378	7	1	1	1
	1	9927412	AtoG	-	NA19190,NA11894,HG00159,NA20524,NA19257,HG00336,NA10847,HG00119,HG00343,NA12287,HG00262,NA12155,NA20754,NA18508,NA20539,NA19138,HG00099,HG00361,HG00131,NA12873,NA20772,NA11994,HG00258,HG00115,NA12004,NA18861,NA20768,NA18858,HG00259,NA18520,NA20513,NA11830,NA19256,NA12874,NA19131,NA11920,HG00337,NA20771,NA19236,NA20819,HG00378,NA20541,NA19144,HG00242,NA20525,NA19113,NA19248,NA07051,NA18923,NA12814…	158	1	1	1
	1	9927417	AtoG	-	NA12043,NA12234	2	1	0	1
	1	9927422	AtoG	-	NA20503,HG00315,HG00111,HG00265,NA19099,HG00236,NA06984,NA19138,NA18486,HG00142,NA20543,NA19214,HG00313,HG00237,NA19147,HG00384,NA11918,NA19131,NA20512,HG00365,HG00240,HG00114,NA20772,NA12874,NA19092,NA19118,HG00373,NA12006,HG00349,NA12842,HG00375,NA12043,NA12234	33	1	1	1
	1	9927426	AtoG	-	HG00158,NA10851,HG00242,NA07051,NA18923,NA12340,NA12763,HG00159,NA12287,NA18934,HG00373,NA12775,NA12282,HG00332,NA12776,NA12842,NA12272,NA19198,NA07347,NA19248,HG00236,NA18520,NA18858,HG00131,NA19214,HG00267,HG00375,NA11881,NA12249,NA12234,NA19095,NA19096,HG00336,NA19098,HG00186,NA19099,HG00361,NA19102,HG00154,HG00251,NA10847,NA19190,NA19092,NA20796,NA20811,HG00097,HG00110,NA20518,NA20519,NA20765…	174	1	1	1
	1	9927430	AtoG	-	NA19214,NA12716,NA18912,NA18916,NA20765,NA20513,NA19131,HG00337,NA18934,NA11893,NA19092,HG00149,NA19207,NA18498,NA12282,NA18511,HG00236,NA11994,NA19102,NA18858,NA19118,HG00231	22	1	1	1
	1	9927462	AtoG	-	HG00242,NA19092,HG00262,NA19248,NA19149,HG00159,NA18858,NA18923,NA19099,NA19185,HG00099,NA18511,HG00378,NA20586,HG00133	15	1	0	1
	1	9927466	AtoG	-	HG00142,NA20765,NA18916,NA11894,NA19095,HG00132,NA19206,HG00099,NA12716,NA20799,HG00375,NA12155,HG00251,NA19138,HG00111,NA19207,NA20814,HG00280,HG00378,NA19160,NA11930,HG00117,NA12287,HG00281,NA18486,NA19223,HG00242,NA11830,NA19118,NA12234,HG00373,HG00342,NA18511,NA12340,HG00237,HG00328,NA19143,HG00114,NA20527,HG00338,HG00236,NA18858,NA19099,NA12750,NA19190,HG00240,NA12889,NA12272,NA18505,NA19152…	61	1	0	1
	1	9927476	AtoG	-	NA19248,HG00117	2	1	0	1
	1	9927477	AtoG	-	NA18916,NA18511,NA19095,HG00111	4	1	0	1
	1	9927478	AtoG	-	HG00117,HG00373	2	1	0	1
	1	9927479	AtoG	-	NA19141,NA06986,NA19223	3	1	0	1
	1	9927495	AtoG	-	NA18511,NA10847,HG00097,NA07048,NA19095,HG00237,NA12775,HG00259,HG00236,HG00343,NA20819,NA19131,NA11930,NA20796,HG00114,HG00251,NA19185,HG00133,NA11832,NA12234,NA12249,NA19096	22	1	0	1
	1	9927496	AtoG	-	NA12234,HG00285	2	0	0	1
	1	9927515	AtoG	-	NA19257,HG01791,NA11894,HG00132,NA12287,HG00373,NA11994,NA19206,NA20527,HG00262,HG00143,NA20589,HG00099,NA19143,HG00154,NA12340,NA12763,NA12249,NA20814,NA19185,HG00281,NA20541,HG00251,NA12234,NA12400,NA19223,NA19138,NA06986,NA11830,HG00138,HG00338,NA11920,NA19200,NA18916,NA18912,HG00267,NA20772	37	1	0	1
	1	9927518	AtoG	-	NA20814,NA12045,NA20505,NA11994,NA20524,HG00361,HG00119,HG00237,HG00315,NA19113,NA06986,NA12249,NA19185,NA12043,HG00187,HG00133,NA19118,HG00240,NA11920,NA19160,HG00130,NA19172,NA19131,NA20519,NA20513,NA11881,HG00117,NA12006,NA18916,HG00132,HG00251,NA20765,NA12058,NA19184,NA19206,NA20819,NA19141,NA19095,HG00373,HG00145,NA12762,HG00114,NA19147,HG00328	44	1	0	1
	1	9927528	AtoG	-	NA11994,NA12340	2	1	0	1
	1	9927532	AtoG	-	NA11920,NA19190,NA19099,NA12340,NA19257,HG00236,NA19160,NA11994,NA19149,HG00183,HG00138,NA12249	12	1	0	1
	1	9927533	AtoG	-	NA12763,HG00237,HG00338,HG00251,HG00119,NA12282,NA20756	7	1	0	1
	1	9927553	AtoG	-	HG00240,NA11994,NA12234,NA10851,NA19099,NA12043,NA20765,NA19147	8	1	0	1
	1	9927565	AtoG	-	NA19099,NA19206	2	1	0	1
	1	9927573	AtoG	-	NA20796,NA12282,NA20756,NA19248,HG00097,NA20505,NA19172,HG01791,NA18511,HG00237,HG00361,HG00267,NA12058,NA12814,NA18912,HG00183,NA20519,NA19184,NA19095,HG00132,NA12763,NA11830,NA20541,HG00117,HG00143,HG00236,NA12045,NA06986,NA19206,NA10851,NA12006,NA12043,HG00119,NA19131,HG00145,NA19185,NA19160,NA20765,HG00138,HG00240,HG00281,NA19118,HG00338,NA12234,HG00343,NA19223,NA19099,NA19147,HG00262,HG00328…	53	1	1	1
	1	9927582	AtoG	-	HG00099,NA19223,NA19131,NA12234,HG00267,HG00328,HG00236,NA20796,NA11994,HG00237,NA11930,NA10847,HG00097,NA19190,NA19099,NA19118,NA20519,HG00259,NA20765,NA10851,NA20513,NA12006,NA12763,HG00132,NA12043,NA19095,NA12400,NA11832,NA18912,NA12814,HG00119,HG00183,NA12058,NA12282,NA19248,NA19206,NA06986,HG00240,HG00117,NA20756,NA18511,NA19160,NA18916,HG00361,NA19184,NA12045,NA20589,HG00133,HG00262,NA11830…	52	1	1	1
	1	9927751	AtoG	-	NA20796,NA12814	2	1	1	1
	1	9927756	AtoG	-	NA19098,HG00259,NA19198,NA20796,NA12154,NA18912,NA19118,NA19116,NA12814,NA19185,NA19171,NA19141	12	1	1	1
	1	9927769	AtoG	-	NA12814,HG00259,NA19118,NA19141	4	1	1	1
	1	9927786	AtoG	-	NA19198,NA19118,NA19171,NA19116	4	1	0	1
	1	9927789	AtoG	-	NA19118,NA20796,NA12761,NA12154,NA19171,NA18486,NA12814,NA19198	8	1	1	1
	1	9927792	AtoG	-	NA19171,HG00259,NA12154,NA12761	4	1	0	1
	1	9927795	AtoG	-	NA12814,NA18486,NA18912,NA12761,NA19116,NA12154,NA19171	7	1	1	1
	1	9927799	AtoG	-	HG00315,NA12814,NA12761,NA19171	4	1	1	1
	1	9927812	AtoG	-	NA19185,NA12761,NA19116	3	1	1	1
	1	9927832	AtoG	-	NA18502,NA19116,NA18912	3	1	0	1
	1	9927838	AtoG	-	NA18912,NA19116,NA19098	3	1	1	1
	1	9927840	AtoG	-	NA18912,NA19116	2	1	1	1
	1	9927874	AtoG	-	NA19116,NA19200,NA19141,HG00338,NA18858,NA20758,NA19206,NA12234,NA12058,NA19214,NA19236,NA18486,NA20532,NA19098,NA19118,NA18511,NA18923,NA20796,NA12761,HG00378,NA18502,NA12399,NA19093,HG00337,NA19248,NA19225,HG00133,NA19223,HG00132,NA18912,NA12814,NA18498,NA12154,NA19131,HG00259,NA19114,HG00315,NA19171,NA19143,NA19185,NA19160,NA19198,HG00236,NA11994,HG00325,NA06985,HG00142,NA19130,HG00234,NA18934	50	1	1	1
	1	9927878	AtoG	-	NA20796,HG00133,NA19223,NA18486,NA19130,NA18912,NA19198,NA19131,NA06985,HG00315,NA19143,NA19225,NA19248,NA12763,NA19098,HG00127	16	1	0	1
	1	9927879	AtoG	-	NA18923,NA20796,NA18486	3	1	0	1
	1	9927891	AtoG	-	NA18498,HG00365,NA12234,NA06985,NA11994,HG00127,NA19185,NA18511,NA18923,HG00375,NA19131	11	1	0	1
	1	9927893	AtoG	-	HG00315,NA19131,HG00365,HG00142,NA12763,NA11840,NA19198,NA12058,HG00132,NA19236,NA20797,NA19214,HG00262,NA11994,HG00375,HG00259,HG01334,HG00234,NA19206,NA20796,NA12399,HG00337,NA12234,NA19248,NA19093,NA20512,NA12154,NA18511,NA19160,NA19116,NA19118,NA18498,NA19141,NA19225,NA19256,NA19130,NA20505,HG00338,NA06985,NA12842,NA18912,NA20758,NA19223,NA19200,HG00145,NA19099,NA20532,NA19185,NA19114,NA12813…	55	1	1	1
	1	9927894	AtoG	-	NA12813,NA20512,HG00236,NA19093,NA19118,NA12154,NA19189,NA19130,NA18873,NA19206,HG00127,NA19098,NA12156,NA20765,NA20797,NA20586,NA19200,NA18934,NA11840,HG00262,NA12399,NA19131,NA19141,NA12058,NA12814,NA18912,HG00234,NA20758,HG00365,NA19225,NA19256,HG00375,NA19214,HG00132,NA18923,HG01334,NA12763,HG00145,NA19185,NA20524,NA20796,NA07357,NA19207,HG00097,NA19236,NA20756,NA19171,HG00244,NA19116,NA19198…	80	1	1	1
	1	9927902	AtoG	-	NA12399,NA19248,NA19200,HG00244,NA19099,NA11994,HG00231,NA19098,NA12814,HG00315,NA18912,HG00338,NA19223,NA20765,NA19143,NA19130,NA18934,NA12156,NA19225,NA12154,HG01334,NA19213,NA19118,NA18498,NA18511,NA18486,HG00097,HG00142,NA19185,NA19236,NA18923,NA12761,NA12842,NA19256,NA19198,HG00099	36	1	1	1
	1	9927907	AtoG	-	NA20771,NA19248,NA19198,NA12829,NA19116,NA20758,HG00365,HG00142,NA11893,NA18858,NA20543,NA18502,HG00131,HG00139,NA19213,NA19141,HG00234,NA20539,NA12156,NA18520,NA19099,NA06985,NA18934,NA19138,NA19118,HG01334,NA12813,HG01791,NA20524,NA12873,NA19206,NA18511,HG00325,NA19130,HG00342,HG00251,NA20505,NA12761,HG00181,NA20532,NA18923,NA18505,NA20814,HG00099,NA12842,NA19185,NA18912,NA18498,NA19189,HG00315…	93	1	1	1
	1	9927910	AtoG	-	NA19248,NA19131,NA20586	3	1	1	1
	1	9927923	AtoG	-	NA19141,NA19248,NA12889	3	1	0	1
	1	9927924	AtoG	-	NA19206,NA18511,HG00262,NA20809,NA12156,NA20797,HG00131,NA19114,NA19131,NA19223,NA12829,HG00132,NA19138,NA12399,NA18508,NA19248,NA12761,HG00342,NA19213,HG00313,HG00325,NA12058,NA18912	23	1	0	1
	1	9927932	AtoG	-	NA12829,NA19185,HG00240,HG00138,NA11832,NA12154,NA12043,NA20530,HG00097,NA19256,NA20756,NA19214,NA20754,NA11930,HG00356,HG00132,NA18502,HG00099,NA20814,NA19257,NA18923,NA19248,NA19143,HG00251,NA20524,HG00133,NA18912,NA12842,NA12814,NA19198,NA12873,NA12399,HG00375,HG00187,NA19200,HG00238,NA12761,NA19236,NA12400,NA20539,NA12813,HG00328,HG00234,NA12762,HG00237,NA20505,NA12763,HG00114,NA19223,NA20586…	108	1	1	1
	1	9927937	AtoG	-	NA19143,NA12813,HG00111,NA19206,HG00127,HG00231,NA18858,HG00373,NA20765,HG00114,HG00262,HG00181,NA18510,NA19118,NA19248,HG00234,NA19099,NA12814,NA12058,NA12340,NA07357,NA18502,NA19107,NA19198,NA20530,NA18912,NA19131,NA11994,HG00338,NA19114,NA12842,NA19117,NA19152,NA12843,HG01791,HG00315,HG00342,NA19214,HG00143,NA12399,NA19130,HG00099,NA19200,NA18934,HG00132	45	1	0	1
	1	9927940	AtoG	-	NA18502,NA19256,NA12348,NA19107,NA20512,NA19098,NA20809	7	1	0	1
	1	9927945	AtoG	-	NA11994,HG00325,NA12889,HG00258,NA12762,NA19098,NA12814,NA19149,HG00097,NA19171,NA12813,NA19147,NA07347,NA19198,NA20543,NA19248,NA18912,HG00262,HG00187	19	1	0	1
	1	9927946	AtoG	-	NA11994,NA18912,HG00342,NA19147,HG01334,NA12348	6	1	0	1
	1	9927952	AtoG	-	HG00356,HG00145,NA20524,NA18486,NA18505,NA20797,NA19138,NA19116,NA20505,NA20543,NA11894,HG00274,NA19130,NA19117,NA20589,NA19137,NA18510,NA12058,NA19257,NA19184,NA18502,NA18909,NA20541,NA19189,HG00142,NA18498,NA19248,HG00132,NA19207,NA11994,HG00262,NA20814,HG00378,HG00251,NA19118,NA19198,NA19114,NA20582,NA19160,HG00137,HG00265,NA12348,NA20532,NA11893,NA19225,NA12399,NA20538,HG00181,NA20539,NA19200…	156	1	1	1
	1	9927962	AtoG	-	NA20754,HG00187,NA19107,NA12286,NA20796,HG00365,NA19098,NA18505,NA19131,NA20589,HG00132,NA11894,NA12750,NA19206,NA19198,HG00097,NA19236,NA07048,NA20518,NA20800,NA11893,NA20582,NA20512,NA20530,NA20797,NA10851,NA18934,NA19093,NA19147,NA18511,NA07347,NA11830,NA19117,NA19152,NA12829,NA12814,NA19118,NA12234,NA12155,NA20588,HG00378,HG00256,HG00343,NA19248,NA19116,NA18912,NA18510,NA19114,NA19189,NA18508…	93	1	0	1
	1	9928037	AtoG	-	NA12399,NA19257,NA20765,HG00338,NA20771,NA11994,HG00372,HG00139,HG00237,NA18858,NA12814,NA12813,NA18912,NA12006,HG00142,HG00343,NA18511,NA12154,NA19171,NA18923,HG00114,NA12762,NA12347,HG00240,NA19098,HG00127,HG00183,HG00111,NA19225,NA18873,NA18486,NA19118,NA19117,HG00378,NA19198,HG00099,HG00315,NA19137,NA19130,NA19214	40	1	0	1
	1	9928039	AtoG	-	NA12347,NA12762,HG00145,HG00338,NA19201,HG01334,HG00240,HG00099,NA19143,HG00343	10	1	0	1
	1	9928049	AtoG	-	HG00234,HG00097,NA19099,NA07357,HG00338,HG00236,HG00277,NA20771,NA12842,NA18502,NA11994,NA20756,NA10847,NA19102,NA19207,NA20582,NA07051,HG00237,HG00325,NA18505,NA20812,HG01791,HG00328,HG00343,NA19147,NA19171,HG00133,HG00342,NA12761,NA20512,HG00259,NA19257,NA12347,NA20518,NA19149,NA19236,NA19131,NA12400,NA12058,NA12889,NA20796,NA18510,NA19143,NA18508,HG00183,NA19225,HG00122,NA19107,NA20530,NA12814…	154	1	1	1
	1	9928055	AtoG	-	HG00256,NA20588,NA18909,HG00251,NA20807,NA12006,HG00143,NA20801,NA18519,HG00234,HG00372,NA20796,NA18502,NA19096,HG00137,NA12842,NA19143,NA20530,NA12399,HG00338,HG01791,NA18873,NA12058,NA19214,NA11994,NA20513,NA12155,NA19200,HG00345,NA07048,HG00240,NA18486,NA20812,NA20752	34	1	0	1
	1	9928072	AtoG	-	NA20765,NA11832,NA18519,NA18502,HG00142,NA18508,HG00183,NA20800,HG00139,NA19114,NA19225,HG00132,NA18873,HG00122,NA19213,NA18486,NA20588,NA19198,NA18934,NA12814,NA20530,NA19099,HG00345,NA10847,NA11840,HG00262,NA12750,NA20787,NA19107,HG00114,HG00145,HG00277,NA12762,NA12006,NA12829,NA18520,NA11994,NA20519,HG00338,NA18912,NA18858,HG00274,NA20812,NA12043,HG00159,NA20807,HG00131,NA19185,NA20512,NA19257…	86	1	1	1
	1	9928079	AtoG	-	HG00342,NA19248,NA19147,NA19184,NA20812	5	1	0	1
	1	9928080	AtoG	-	NA19225,NA19198,NA12058,NA20765,NA19184,NA19099,NA12154,NA19147,HG00142,NA19200,HG00277,NA12399,NA19214,NA19130,HG00338,NA12286,HG00131,NA19257,NA20797,HG00342,NA20513,NA18510,NA12889,HG01791,NA12234,NA18912,NA19143,NA19114,NA11840,HG00237,NA18486,NA20588,NA18502,HG00345,NA11994,NA12750,NA19189,HG00369,NA12873,NA18923,NA20787,HG00238,NA19137,NA19113,NA18511,HG00265,NA20800,HG00259,HG00111,HG00097…	58	1	0	1
	1	9928089	AtoG	-	NA19185,NA19223,NA12154,NA19149,NA18858,HG00234,NA12043,NA12763,NA20512,NA20807,HG00342,NA07357,HG00325,NA18923,NA19141,HG00138,NA18909,NA20801,NA18486,NA19093,NA12006,HG00365,HG00111,NA18912,NA18502,HG00259,HG00265,HG01791,NA19236,NA10847,HG00132,NA18498,HG00338,NA20797,NA19118,NA19200,NA20754,NA20765,NA12889,NA12750,NA19201,NA19138,HG00099,NA19096,NA19098,NA18511,NA20543,NA12399,NA18934,NA19113…	64	1	1	1
	1	9928098	AtoG	-	NA12889,NA12043	2	1	0	1
	1	9928110	AtoG	-	HG00251,NA19113,NA18486,NA19131,NA12750,NA19184,NA18934,NA19198,HG00111,NA18502,NA18511,NA20543,HG00325,NA20765,NA18909,NA20754,HG00132,NA19118,HG01791,HG00338,NA19141,NA18912,HG00099,NA18923,NA12154,NA12399,NA19185,NA19200,HG00315,NA12043,HG00259,NA19223,NA11881,NA19149,NA19248,NA19206,HG00234	37	1	0	1
	1	9928132	AtoG	-	NA19131,NA18912,HG00315,NA18486,NA19171,NA18923,HG00365,NA19185,NA20765,NA19141,NA19248	11	1	0	1
	1	9928174	AtoG	-	NA18858,NA19189,NA19213	3	1	0	1
	1	9928186	AtoG	-	NA12761,HG00183	2	1	0	1
	1	9928190	AtoG	-	NA19248,NA19098,NA19129,NA19143,NA19118,NA12763,NA18858,NA20765,NA20513,NA19189,NA20543,HG00326,NA19214,NA19206,HG00365,NA19092,HG00097,NA19116,NA18486,HG00315,HG00183,NA18934,NA19213,HG00099,NA19108,NA12154,HG00143,NA19131,NA19225,NA19200,NA18923,NA12058,NA18909,NA19130,NA12399,NA18912,NA19171,NA12761,NA19223,NA12043,NA19141,NA19185,NA18498,NA19093,NA19198,NA11994,NA18502,NA12347	48	1	1	1
	1	9928191	AtoG	-	NA12761,NA18912,HG00097,NA19108,NA19129,NA19185,NA19141,NA18909,NA12154,NA12043,HG00143,NA18934,NA20513,NA19214,NA18858,NA19213,NA19092,NA19130,NA19206,NA19093,HG00315,NA20765,NA19116,NA18923,NA19131,NA12058,NA19189,NA19143,NA19225,NA19098,NA19200,NA19248,HG00326,NA18502,NA11994,HG00183,NA18498,NA18486,NA19223,NA19171	40	1	1	1
	1	9928201	AtoG	-	NA18486,NA18934,HG00183,NA18858,NA19143,NA19116,NA19129,NA20513,NA19098,NA18923,NA19248,NA19200,NA19214,NA18909,NA19131,NA12763,HG00099,NA19130,NA18498,NA19225,NA18502,NA19093,NA12058,NA19171,NA19223,NA19141,NA18912,NA20543,NA19206,NA19108,NA19213,HG00097	32	1	1	1
	1	9928213	AtoG	-	NA18498,NA19129,NA19200,NA19130,NA12058,NA19214,NA18502,HG00183,NA18486,NA18934,NA18912,NA18909,HG00315,NA19108,NA19131,NA19141,NA19223,NA19143,NA19098	19	1	1	1
	1	9928230	AtoG	-	NA18912,NA18498,NA19214	3	1	0	1
	1	9928231	AtoG	-	NA19116,NA18858,NA19214	3	1	0	1
	1	9928250	AtoG	-	HG00375,NA19147,NA18511	3	1	0	1
	1	9928274	AtoG	-	NA12873,NA18912,NA12814,NA18511,NA19131,NA19141,NA19143,NA12347,NA18858,NA18502,HG00183,NA12154,HG00315,NA12058,NA18498,NA19171,HG00375,NA11832,NA19223,NA19147,NA19198,NA19214,HG00143,NA18486,NA12399,NA19113,NA20543,NA19114,NA19225,NA19116,NA20513,NA19189,NA18923,HG00373,NA20765,NA12763,NA19118,HG00097,NA18934,NA19096,NA19200,NA19129,NA19093,NA19098,NA19130,NA11994,NA19107,NA19185,NA12043,NA19206…	51	1	1	1
	1	9928287	AtoG	-	NA18909,NA19092,NA12154,NA19107,NA18912,NA18486,HG00326,NA19214,NA12347,NA12873,NA19113,NA19096,NA19114,NA18923,NA20543,HG00315,NA18511,NA12814,HG00262,NA19143,NA11920,NA19223	22	1	1	1
	1	9928299	AtoG	-	NA20800,HG00262,NA19189,NA19114	4	1	0	1
	1	9928311	AtoG	-	NA19189,HG00262,NA20765,NA18498,NA18912,NA19225,NA19129,HG00375,NA12763,NA11832,NA12873,NA19093,NA19223,NA19147,NA18511,NA19114,NA19131,NA20800,HG00236,NA19118,NA12814,NA19214,NA11994,NA12399,HG00326,NA18923,NA19096,NA20543,NA20513,NA11920,NA18486,NA12043,NA19108,HG00373,NA19116,HG00183,NA18502,NA19143,NA19098,NA19113,NA12347,NA19107	42	1	1	1
	1	9928366	AtoG	-	NA11920,HG00375	2	0	0	0
	1	9928632	AtoG	-	NA19117,HG00183,NA12045,HG00326,NA12813,NA18909,NA20811,NA19236,NA12399,NA18486,NA12058,NA19225,NA19116,NA20772,NA06986,NA18916,HG00272,NA20800,NA07056,NA18508,HG00137,NA20541,HG00271,NA20797,NA19114,NA19131,NA18923,HG00356,NA11831,NA12286,HG00187,HG00378,NA20790,NA20826,HG00150,HG00349,NA19113,NA12341,NA19130,NA11920,HG00099,HG02215,NA19213,HG01791,NA19147,NA19214,NA20812,NA19108,NA12342,NA18908…	156	1	1	1
	1	9928633	AtoG	-	NA12234,HG00109,HG00138,NA19092,NA20785,HG00111,NA12399,HG00108,HG00346,NA20536,NA18912,NA19093,NA12489,HG00127,NA18908,NA19129,NA19141,HG00236,NA20539,NA20799,NA19214,NA19147,HG00356,NA19201,NA20826,NA19096,NA20803,NA12272,NA11831,NA12286,NA20541,NA18508,NA10847,HG00187,HG00378,NA19108,NA18499,NA12342,NA19143,HG00150,HG00129,NA19248,NA18909,HG00240,NA11893,HG00336,NA12045,HG00337,HG00373,NA12006…	183	1	1	1
	1	9928634	AtoG	-	NA20536,NA20796,NA11930,NA12750,NA12716,NA19189,NA18511,NA19207,HG00132,NA19118,HG00240,NA19129,HG00137,NA12249,NA20815,NA12775,HG00157,NA19116,NA19225,NA11840,NA10847,NA12399,NA19210,HG00111,NA19147,NA20765,NA12340,NA18917,NA19119,NA19141,NA18912,NA12763,NA12234,NA19093,HG00262,NA12873,NA19198,NA19095,HG00106,HG00149,NA12348,NA12717,NA18861,NA20535,NA19096,NA07056,NA12272,NA20758,NA19200,NA07357…	171	1	1	1
	1	9928660	AtoG	-	HG00132,HG00240,NA19207,NA18511,NA19236,NA20796,NA12399,NA12716,HG00242,NA20582,NA18505,NA18870,NA11994,HG00106,NA11918,NA11831,NA18934,HG00378,NA20790,HG00097,NA19171,NA18908,HG00234,NA20826,NA12873,NA20771,NA19095,NA19143,NA12348,HG00325,HG00384,HG00277,NA18502,NA19129,NA19130,NA12045,NA19118,NA19190,NA19152,NA11920,NA19131,NA19119,NA18912,HG00328,NA19137,NA07056,NA12340,NA20765,NA19223,NA19248…	74	1	1	1
	1	9928670	AtoG	-	NA19214,NA19099,HG00127,NA12399,HG00365,NA12750,HG01334,NA18511,NA19206	9	1	0	1
	1	9928691	AtoG	-	NA11994,NA19098,NA12156,NA12275,NA20505,HG00234,HG00343,NA12842,NA19257,NA19092,NA18505,NA18870,NA19143,HG00258,NA18502,NA12762,NA19189,NA18511,NA12282,HG00240,HG00236,NA19118,NA19172,HG00361,NA20758,NA12348,NA11832,HG00127,NA19095,NA18873,NA12763,HG00126,HG01791,NA11894,NA12761,HG00373,NA20765,NA20815,HG00335,NA20513,NA11881,NA19107,HG00180,NA12829,NA18519,HG00114,HG00138,NA19223,NA20527,NA11992…	106	1	1	1
	1	9928694	AtoG	-	NA11994,NA18870,NA19257,NA12842	4	1	0	1
	1	9928702	AtoG	-	NA12043,HG00335,NA12347,NA19095,NA18923,NA19131,NA20772,NA19118,NA20505,NA19108,HG00127,NA19172,NA11920,NA11992,NA19117,NA19171,HG00342,NA11881,NA19107,HG00111,NA19213,NA19198,NA18498,NA19130,NA18505,NA20530,NA20796,HG00138,NA06986,HG00236,NA19143,NA18502,NA12546,NA18870,NA12340,NA20826,NA18511,NA12272,NA12873,NA18508,NA20758,NA19184,NA19114,NA20765,NA19093,HG00328,HG00179	47	1	0	1
	1	9928706	AtoG	-	HG00179,NA19143,NA06986,NA19171,NA12006,NA19257,HG00097,NA12043,NA12760,NA18508,NA19102,NA19116,NA18870,HG00338,NA20505	15	1	1	1
	1	9928708	AtoG	-	NA18498,NA19095,NA12717,NA19118,HG01791,NA19172,NA20796,NA19108,NA18923,NA11893,NA11831,HG00114,NA19131,NA12275,NA18909,NA12842,NA20814,HG00328,NA20797,NA12489,NA12043,HG00179,NA19098,NA18870,HG00183,NA19149,NA19143,NA19257,NA18505,HG00259,NA12399,NA19130,NA19236,NA19116,NA18508,NA20758,NA19096,NA19201,NA12889,NA11920,NA12348,NA07051,NA12347,HG01334,NA11918,HG00277,HG00119,NA19114,NA18934,NA19213…	66	1	1	1
	1	9928732	AtoG	-	NA12156,NA11992,HG00337,NA18934,NA19149,NA19190,NA18870,NA18923,NA19236,NA19098,NA18505,NA11920,HG00154,NA19223,NA19131,NA19143,NA19099,NA19213,NA19114,NA12399,NA20765,NA12340	22	1	0	1
	1	9928744	AtoG	-	NA12058,NA19114,NA20811,NA20530,HG00361	5	1	0	1
	1	9928751	AtoG	-	NA12842,NA12347,HG00342,NA19108,NA18917,HG00361,NA20527,NA20589,HG00189,NA12716,NA12044,NA20758,NA19092,NA20541,NA18499,HG00315,NA19093,HG00234,NA18508,NA12156,HG00378,NA12340,NA20797,NA18912,NA06986,NA12874,HG00110,HG00180,NA18519,HG00251,NA19107,NA12873,NA12058,NA18909,NA20803,NA18916,HG00325,HG00281,NA19223,NA11992,NA12286,NA20765,NA20530,NA20538,NA18498,NA19213,HG00238,NA12489,HG00365,NA18934…	172	0	1	1
	1	9928754	AtoG	-	NA20799,NA11840,HG00365,HG00315,NA20811,NA12873,NA12842,NA19108	8	1	0	1
	1	9928764	AtoG	-	NA12156,NA19190,NA12043,HG00237,NA19207,NA19129,NA18870,NA12760,NA19206,HG00236,NA18916,NA20803,NA19223,HG01334,NA20527,NA18858,NA20799,NA19153,HG00097,NA12399,HG00375,NA06986,NA18923,HG00277,NA12829,NA18912,HG00138,NA18917,NA12347,HG00342,NA19095,NA19147,HG00251,HG00117,NA12286,NA11881,NA19099,HG00180,NA19143,NA18909,NA11831,NA18486,NA18511,NA20771,NA18508,NA19131,NA18498,NA19225,NA19113,NA19213…	60	1	0	1
	1	9928767	AtoG	-	HG00375,NA19172,NA19223,NA18916,NA18912,NA11831,HG00258,NA11881,NA19119,NA20765,NA18908,NA19147,NA18505,HG00336,NA20527,NA18511,NA19096,NA19138,NA18858,NA19129,HG00237,NA19092,NA19189,HG00373,NA20811,HG00159	26	1	0	1
	1	9928768	AtoG	-	NA19160,NA20803,NA12873,HG00139,NA20814,NA06986,NA20507,NA19153,NA19152,NA12874,NA12286,NA11831,NA19149,HG00183,NA18486,NA18499,NA18870,NA20758,NA12234,HG00142,NA18858,NA20527,HG00180,HG00262,NA18511,NA12272,NA18508,NA12275,NA18505,NA18502,NA19257,NA19143,HG00111,NA19118,NA12006,NA20811,NA11894,NA20765,NA19119,HG00259,NA19114,NA20513,HG00315,NA07051,HG00338,NA19129,NA19116,NA19107,HG00154,NA11994…	134	1	1	1
	1	9928776	AtoG	-	HG00138,HG00240,NA07347,HG00180,NA20527,HG00231,NA11840,NA06986,HG00097,NA12340,NA19141,NA12234,NA19153,NA19095,NA19152,NA12889,NA19118,HG00179,HG00325,NA20771,NA11994,NA19223,NA19143,NA19257,NA19171,NA20505,NA18502,NA19129,NA18934,NA19207,NA19130,NA12762,NA12045,NA20582,NA20826,NA19092,HG00159,NA12043,HG00119,HG00237,HG00315,NA19190,NA20800,NA12006,NA19213,NA19093,NA11930,HG00276,NA12717,NA18923…	110	1	0	1
	1	9928789	AtoG	-	NA12716,HG00236	2	1	0	1
	1	9928791	AtoG	-	NA19153,NA19116,NA18912,NA19189,HG00234,HG00145,NA12763,NA20507,NA12340,NA20586,NA18498,NA18909,NA20801,NA12043,HG00276,NA19118,HG00237,HG00138,NA18870,NA19172,NA19236,HG00262,NA19149,HG00154,HG00277,NA18486,NA12282,HG00143,NA12762,NA12873,NA19131,HG00383,NA20765,NA19130,NA18917,NA20504,NA12716,NA11893,NA12286,NA18916,NA18923,NA20531,NA12058,NA19129,NA18858,HG00127,HG00375,NA11994,NA20506,NA19214…	91	1	1	1
	1	9928793	AtoG	-	NA12762,NA18870,HG00143,NA19185,NA19131,NA19200,NA19190,NA12045,NA20802,NA12813,NA19113,HG00251,NA18873,NA12155,NA20538,NA20536,HG00238,NA11894,NA11881,NA19225,NA19138,NA19171,NA19098,NA20826,NA19108,NA12044,NA18510,HG00099,HG00235,NA20799,HG00365,NA10847,NA19209,HG00373,HG00259,HG00237,NA19117,NA19214,NA20765,HG00111,HG00383,NA19130,HG00097,NA20519,NA18858,NA12399,NA19118,NA18908,NA20801,NA12156…	168	1	1	1
	1	9928794	AtoG	-	NA19108,NA20536,HG00097,NA19093,HG00142,NA18511,NA19129,NA19131,HG00235,NA19248,HG00373,NA19137,NA19114,NA11881,NA12716	15	1	0	1
	1	9928800	AtoG	-	HG00259,NA20765,HG00338,NA11918,NA19171,HG00133,NA12763,NA11831,NA12775,NA12399,NA19223,NA18912,NA18916,NA18908,NA19189	15	1	0	1
	1	9928819	AtoG	-	NA19129,HG00142,HG00183,NA11831,NA12155,NA20504,HG00117,NA18505,NA19189,NA11881,NA18912,HG00126,HG00378,NA07347,NA20588,NA19117,HG00099,NA18909,NA18511,NA12829,NA19143,NA19223,NA18499,NA19214,HG00262,NA20506,NA20771,NA18934,HG00236,HG00375,NA18858	31	1	0	1
	1	9928820	AtoG	-	NA19248,NA12347,HG00235,NA18511,NA19223,HG00099,NA10847,HG00277,NA19117,NA19189,NA20796,NA19160,HG00315,HG00119,NA12716	15	1	0	1
	1	9928827	AtoG	-	NA18923,HG00159,NA12889,NA19223,NA12546,NA18908,NA19143,NA12829,NA11832,NA19214,NA19185,NA19108,NA12399,NA19130,NA18909,NA20588,NA18498,HG00099,NA19116,HG00259,NA07347,HG01791,HG00378,HG00236,NA18511,NA18934,NA20771,NA11992,HG00119,NA19248,NA20758,NA19189,NA12347,NA19138,NA20531,NA12874,NA20527,NA19092,NA11881,NA19099,HG00126,NA19117,NA20506,NA19198,NA12006,NA20519,NA19096,NA11831,HG00343,HG00251…	57	1	0	1
	1	9928847	AtoG	-	HG00117,NA19092,NA18934,HG00119,HG00159,NA18923,NA18917,NA18908,NA07051,NA11881,NA18873,HG00111,NA18858,NA19096,NA20527,NA18511,NA19098,NA18499,NA19099,NA19143,NA19257,NA12043,HG00133,HG00154,NA18486,NA20506,NA19153,NA20582,NA19209,NA19198,NA19113,NA12874,NA12347,HG00097,HG00127,NA20505,NA11930,HG00361,NA12829,NA12286,HG00315,NA19225,NA19116,NA20536,NA19108,HG00259,NA19189,NA07347,NA11831,HG00236	50	1	0	1
	1	9928853	AtoG	-	NA18508,NA19093,HG00343,NA20588,NA19225,HG00364,NA11831	7	1	0	1
	1	9981442	AtoG	+	HG00355,NA19095	2	1	0	1
	1	9982834	AtoG	+	HG00262,NA12889,HG00237,HG00119,HG00188,HG00338,NA19108,NA20826,NA19248,HG00117,NA12156,HG00110,NA18873,NA11831,NA19130,NA12873,NA20527,NA20513,NA11893,HG01334,NA11894,NA19114,NA20538,NA12043,HG00109,NA19118	26	1	1	1
	1	9982836	AtoG	+	NA19130,NA12873,HG00237,NA20512,NA07347,HG00276,NA12872,NA19114,NA12546,HG00284,NA20528,HG00105,HG00338	13	0	0	0
	1	9982844	AtoG	+	NA11994,NA19108,NA11894,NA12044	4	0	0	0
	1	9982852	AtoG	+	HG00117,NA20826,NA12044,NA12889,HG00237,HG00313,NA11831,HG00344,NA20513,HG00236,HG00101,NA11894,NA06986,NA12813,NA18873,NA11881,HG00365,NA19114,NA11830,NA20528,NA11994,HG00109,NA19248,NA12043,NA19118,HG00262,NA12156,HG00188,HG01334,NA20527,HG00240,NA20771,NA19108,HG00158,HG00110,HG00105	36	1	1	1
	1	9982853	AtoG	+	HG00158,HG00240,NA12156,NA19130,NA20771,NA06986,NA11831,HG00365,NA20527,NA11881,HG00313,HG00101,NA11894,HG01334,HG00109,NA20513,NA19108,HG00237,NA19118,NA11830,NA11893,NA12889,HG00119,HG00188,NA12044,HG00262,HG00338,NA12813,HG00364,HG00117,NA18873,NA12043,HG00110,NA20528,NA11994	35	1	1	1
	1	9982879	AtoG	+	HG00240,HG00105,NA12889,HG00338,NA11832,NA11830,NA12873,NA20771,HG00117,NA06986,HG00110,HG00158,HG00237,NA20527,NA19108,HG00119,NA19248,NA20826,NA20513,NA12813,HG00101,NA19118,NA11893,NA11994,HG00365	25	1	0	1
	1	9982929	AtoG	+	NA20527,HG00365,HG00117	3	1	1	1
	1	9982930	AtoG	+	NA19095,NA12751,HG00355,NA12716,NA20527,HG00365,NA19108,HG00117	8	1	1	1
	1	9982985	AtoG	+	HG00117,NA20527	2	1	1	1
	1	9983021	AtoG	+	HG00117,NA18486,NA19114,NA20518,HG00127	5	1	1	1
	1	9983031	AtoG	+	NA19114,NA19160,HG00127,HG00117,NA11832,NA20527,NA18486	7	1	1	1
	1	9983055	AtoG	+	NA19160,NA19114,NA18486	3	1	0	1
	1	9983056	AtoG	+	HG00127,NA19160	2	1	0	1
	1	9983092	AtoG	+	NA20518,HG00157,NA18486,NA20527,HG00117,NA19114,NA11992,NA07347,NA11894,NA12873	10	1	1	1
	1	9983189	AtoG	+	NA20803,NA20516,NA20543	3	1	0	1
	1	9983192	AtoG	+	NA20808,NA19172,HG00157,HG00188,NA19256,HG00325,NA20803,NA20543,NA20518,NA07347,NA20513,HG00109,NA20527,HG00379,NA12873,NA12341,NA20516,NA20512,NA20802,NA11894,HG00338,NA07357,NA20800,HG00373,NA11992,NA20528,NA11881,HG00108,NA10851	29	1	1	1
	1	9983193	AtoG	+	HG00378,NA10851,NA20543,NA20527,HG00109,HG00338,HG00154,NA12156,NA20800,NA11894,HG00117	11	1	0	1
	1	9983194	AtoG	+	HG00375,HG00342,NA11894,HG00365,NA12842	5	1	0	1
	1	9983208	AtoG	+	HG00342,NA11894,NA18873	3	1	0	1
	1	9983212	AtoG	+	NA12286,NA20516,NA12890,NA12813,NA18873,NA20756,HG00375,NA20513,HG00188,NA20528,NA19160,NA19153	12	1	0	1
	1	9983226	AtoG	+	NA19223,NA19248,NA18519	3	0	0	0
	1	9983232	AtoG	+	HG00384,NA12842,NA12750,NA20800,NA19172,NA20808,NA20756,HG00378	8	1	0	1
	1	9983235	AtoG	+	NA19153,HG00338,NA07357,HG00328	4	1	0	1
	1	9983240	AtoG	+	NA12341,NA19113,NA12890,HG00117	4	0	0	0
	1	9983244	AtoG	+	HG00378,HG00379,NA12873,HG00274,NA12842,HG00131,NA10851,NA12750,HG00127,NA20774,NA12761,NA19256,NA20527,HG00345,HG00109,HG00324,HG00262,HG00384,NA12249,HG00246,NA20528,HG00096,NA11831,HG00325,HG00145,NA19113,NA18498,NA12156,NA12342,HG00108,NA20512,NA12144,NA20513,HG00139,HG00236,HG00373,HG00133,NA20518,HG00338,NA11894,HG00259,NA20543,HG00328,HG00188,HG00099,NA11992,NA19153,HG00154,NA07357,NA19131…	61	1	0	1
	1	9983251	AtoG	+	NA12341,NA20802,NA20812,NA19092,NA11831,HG00109,HG00138,HG00346,HG00369,HG00131,HG00108,HG00338,NA12156	13	1	0	1
	1	9983257	AtoG	+	NA20797,HG00268,NA20803,HG00375,NA20513,NA11995,HG00346,HG00342,NA11881,NA12144,HG00242,NA07347,NA12761,HG01334,HG00324,NA19130,NA20771	17	1	0	1
	1	9983261	AtoG	+	NA19153,NA11881,HG00188,HG00338,NA12890,NA18511,HG00277,NA20756,HG00274,NA18498,HG00246,NA12873	12	1	0	1
	1	9983267	AtoG	+	HG00157,NA20543,HG00188,NA12750,HG00105,NA12341,NA12776,NA07347,NA12716,HG00346,HG00378,NA20814,NA19113	13	1	0	1
	1	9983276	AtoG	+	NA20765,NA20803	2	0	0	1
	1	9983289	AtoG	+	NA20797,HG00259	2	0	0	0
	1	9983300	AtoG	+	NA20797,NA19113,NA20513,HG00154,HG00345,HG00157,NA18511,NA20527,NA20812,NA18489,NA19190,NA19172,HG00315,NA12814,HG00244,HG00262,NA12144,HG00349,NA12829,HG00138,HG00367,HG00242,NA19130,HG00234,NA12716,HG00373,NA20538,HG00139,NA18873,NA12827,NA18498,NA12873,HG00268,NA19209,HG00130,NA07051,HG00324,HG00326,HG00325,HG00105,NA19256,NA19248,HG00133,NA06989,NA07347,NA19223,HG00269,HG00131,NA19200,HG00360…	129	1	1	1
	1	9983304	AtoG	+	HG00246,HG00365,NA12889,HG00174,NA20532,NA12340,NA11831,HG00262,HG00328,NA20768,NA12827,HG00315,NA18511,NA20814	14	1	0	1
	1	9983305	AtoG	+	NA19209,NA12144,HG00259,HG00313,NA12814,NA18489,HG00157,HG00154,HG00360,HG00138,HG00145,HG00109,NA12340,NA20802,NA11832,NA20516,HG00378,HG00345,HG00338,HG00139,HG00367,NA12827,NA12716,NA20517,NA19131,NA11995,NA19223,NA11992,NA19160,HG00105,NA19143,NA18858,HG00358,HG00369,NA20812,NA20771,NA19113,NA20803,NA19256,NA11829,HG00262,NA12750,HG00096,NA07347,HG00130,HG00346,NA10851,HG00108,NA19092,NA11894…	124	1	1	1
	1	9983342	AtoG	+	HG00274,NA19130,NA19248,NA11829,NA07347,HG00143,HG01334,NA19113,NA11894,HG00244,HG00142,HG00326,NA19190,HG00365,NA19223,NA20538,HG00114,NA20513,NA12829,NA12275,HG00373,HG00109,NA12813,NA12348,NA18498,NA20797,HG00369,NA19092,NA18858,NA11832,HG00280,NA20527,NA07051,HG00105,NA18511,NA12750,HG00234,HG00240,NA12058,NA19200,HG00157,NA18519,NA20774,NA19143,NA19131,HG00315,HG00375,NA11992,HG00378,NA20543…	53	1	0	1
	1	9983357	AtoG	+	NA12776,NA19117	2	1	0	1
	1	9983393	AtoG	+	HG00338,HG00268,HG00114,HG00346,NA20756,NA20803,NA20532,NA18511,NA12889,HG00269,NA12006,NA11894,HG00143,NA07347,NA18489,NA11832,HG00358,NA12340,NA18916,NA06985,NA12249,NA11930,NA19200,HG00109,HG00325,NA20758,HG00367,HG00349,NA19209,HG00379,HG00145,NA20513,NA12760,HG00328	34	1	0	1
	1	9983399	AtoG	+	NA19223,NA12286,NA20508,NA20800,HG00269,NA20803,HG00349,NA18489,NA20758	9	1	0	1
	1	9983400	AtoG	+	NA20765,NA18858,NA12286,HG00378,HG00139,NA19190,NA12716,HG00342,NA12340,NA12776,HG00277,NA19209,NA12763,NA12043,NA18916,HG00268,NA12842,HG00328	18	0	0	1
	1	9983423	AtoG	+	NA20508,NA12249,HG00373,NA20758,NA19200,NA12760,HG00269,NA12889	8	0	0	1
	1	9983435	AtoG	+	HG00109,NA18519,HG00326,NA19209,NA11930,NA19131,HG00349,NA11830,HG00244,NA19143,NA12889,HG00105,NA11893,NA12058,NA20527,NA20774,NA12829,NA20797,HG00114,HG00269,NA18916,HG00379,HG00117,NA20756,NA11995,NA06985,NA20803,HG00133,HG00367,NA19256,NA11894,HG00325	32	1	0	1
	1	9983440	AtoG	+	NA12249,HG00349	2	1	0	1
	1	9983446	AtoG	+	HG00133,NA11894,NA19223,NA18923,NA12156,NA12829	6	0	0	1
	1	9983454	AtoG	+	NA19223,HG00378,NA11830,HG00111,HG00143,NA12842,HG00338	7	0	0	1
	1	9983468	AtoG	+	NA12043,NA11930,NA12340,NA18934,NA11832,NA12249,HG00259,NA11893,NA20527,HG00378,NA12006,NA18858,HG00133,NA19223,NA12156,NA20797,NA10847,NA19256,HG00375,NA19172,NA11830,NA12058,HG00105,NA11995,HG00244,NA20532,HG00117,HG00109,NA19131,NA12889,NA12716,HG00111,NA12275,NA18923,HG00114,NA11894,HG00338,NA12829,NA12814	39	1	1	1
	1	9983469	AtoG	+	HG00117,NA19172,NA20532,NA18916,HG00375,NA11893,NA12249,NA10847,NA12814,NA11930,NA18923,NA12058,NA12889,NA12340,HG00338,HG00114,NA12776,HG00105,NA12043,HG00109,HG00111,NA12286,NA18934,NA11894,NA12156,NA11830,HG00259,NA20797,HG00349,NA11995,NA11832,NA12829,NA12275,NA19131,HG00378,NA19223,HG00139,NA06985,NA12716,HG00244,NA19256,NA12006,NA20527	43	1	1	1
	1	9983479	AtoG	+	NA12275,NA12716,NA18934,HG00375,NA12340,HG00338,NA10847,NA19256,NA20797,HG00117	10	1	0	1
	1	9983493	AtoG	+	NA20797,NA20527	2	1	0	1
	1	9983509	AtoG	+	HG00117,HG00338,NA12814,NA18916,HG00259,NA12006,NA19172,NA12156,NA20527,NA12716	10	1	0	1
	1	9983535	AtoG	+	NA12716,NA20527	2	1	0	1
	1	9983809	AtoG	+	HG00344,NA06989	2	0	0	0
	1	9984079	AtoG	+	NA19095,NA12716,NA06985,HG00117,NA20527,NA06986	6	1	1	1
	1	9984165	AtoG	+	NA12874,NA12716,NA06985,HG00105,HG00117	5	1	0	1
	1	9984177	AtoG	+	NA12058,NA20527,NA12874,HG00117,NA06985,NA12716,HG00105,NA06986,NA19095,NA19189	10	1	0	1
	1	9984187	AtoG	+	NA19095,NA06986,NA12716,NA19099,NA20527,NA06985,HG00105,HG00117,NA11992,NA12058,NA11894,NA19189,NA12340,NA19209,HG00111	15	1	0	1
	1	9984189	AtoG	+	NA18916,NA19099	2	1	0	1
	1	9984213	AtoG	+	NA19095,NA12340,NA06985,NA19209,NA11894,NA20771,NA19108,NA20543,NA11994,NA18858,HG00111,NA20527,NA19116,NA12716,NA18498,HG00117,NA19189,HG00105	18	1	0	1
	1	9984214	AtoG	+	NA11894,NA06985,HG00105,NA19209,NA12874,NA12340,NA20771,NA06986,NA18916,NA19095,NA11994,NA11992,NA20527,NA12716,NA19189,HG00117,NA19093	17	1	0	1
	1	9984221	AtoG	+	NA19116,NA19095,HG00111,NA20527,HG00117	5	1	0	1
	1	9984227	AtoG	+	NA20527,NA19099,NA11992,NA19095,NA20543,NA12340,HG00117,NA11894,NA18916,NA18498,NA12716,NA19093	12	1	0	1
	1	9984247	AtoG	+	NA20527,NA06985,NA06986,NA19095	4	1	0	1
	1	9984252	AtoG	+	NA19093,NA12716,NA19095,NA11994,NA06986,NA20527,NA18916,NA12340,NA11992,HG00117	10	1	1	1
	1	9984294	AtoG	+	NA06986,HG00117,NA19108,NA19095,NA20527,HG00111	6	1	0	1
	1	9984308	AtoG	+	HG00105,NA19093,HG00133,NA11992,NA19159,NA18502,HG00150,NA20815,NA11894,NA20771,NA12043,NA19108,HG00117,NA20527,HG00240,NA06986,NA19116,NA20513,HG00338,NA19118,NA19095,NA12763,NA18858	23	1	1	1
	1	9984309	AtoG	+	NA19209,NA20765,NA20543,HG00150,NA11994,HG00240,NA20513,NA20527,NA18916,NA19144,NA18502,NA18858,HG00133,NA19108,NA20815,HG00364,NA12400,NA19095,HG00338,NA19118,NA12763,NA20771,NA11992,NA19093,NA19116,HG00111,HG00105,NA06986,NA19159,NA11894,HG00117,NA12842,HG00262,NA12043	34	1	1	1
	1	9984321	AtoG	+	NA19159,HG00240,NA19095,NA12340,NA12716,NA20771,NA12400,HG00111,NA19209,NA20765,NA11894,NA12842,HG00105,NA11994,NA19144,NA19118,NA06986,NA19116,NA18502,NA19108,HG00133,NA06985,NA20513,NA20527,HG00117,NA20543	26	1	1	1
	1	9984327	AtoG	+	NA19144,HG00150,HG00133,HG00338,NA12716,NA20527,HG00111,NA12763,NA19095,NA20765,HG00105,NA18498,NA11992,NA11832,NA19209,NA06986,NA12842,NA18502,HG00240,NA11994,NA12043,NA19099,NA19118,NA18916,NA18858,NA19108,NA12400,NA20771,HG00130,HG00117,NA11894	31	1	1	1
	1	9984339	AtoG	+	NA18502,NA19116	2	1	0	1
	1	9984387	AtoG	+	NA12842,NA18916,NA20815	3	0	0	0
	1	10306514	AtoG	+	HG00234,HG00143,HG00355,NA20527,HG00117,NA19108,NA19095,NA20796	8	1	0	1
	1	10377683	AtoG	+	HG00131,NA20509,NA19129	3	1	0	1
	1	10418628	AtoG	+	HG00355,NA20527	2	1	0	1
	1	10457216	AtoG	-	NA19153,NA11830,HG00160,NA11829,NA19114,NA20790,NA12763,NA12348,HG00380,NA20799,HG00180,NA20508,HG02215,NA20787,HG00362,HG00148,NA19248,HG00369,NA20773,NA12045,NA12400,NA20542,NA20531,HG00138,HG00159,NA20521,HG00154,HG00263,NA18916,NA19197,NA07357,HG00145,HG00136,NA11930,NA12155,HG00125,HG00109,HG00327,HG00096,NA19198,NA07048,HG00240,NA20803,NA20517,HG00233,NA18488,HG00120,HG00346,NA20752,HG00123…	231	0	0	1
	1	10457219	AtoG	-	NA12813,HG00120,HG00179,NA20761,NA20803,NA20517,HG00173,HG00233,NA11881,NA19116,NA19198,NA20819,NA18908,NA18870,HG00116,HG00331,HG00234,NA12155,HG00176,HG00327,HG00266,HG00189,HG00280,NA19114,NA20790,NA20513,HG00160,NA11830,HG00351,NA20525,HG00256,NA20752,NA20814,HG00358,NA12760,HG00178,NA20760,NA12234,HG00338,NA06985,NA12814,HG02215,NA20797,NA20504,NA12399,HG00186,HG00180,HG00244,HG00362,NA11931…	287	1	1	1
	1	10457233	AtoG	-	NA20538,NA11894,NA12273,NA18498,HG00189,HG00266,NA20772,HG00257,HG00149,NA12043,NA20518,NA11892,HG00356,HG00373,NA20771,NA20541,NA20796,NA11831,NA12873,HG00119,HG00275,HG00181,NA20828,NA11994,HG00282,NA20806,HG00264,HG00265,HG00309,NA12400,HG00343,NA12341,HG00258,HG00099,HG00129,NA20521,NA12045,HG00130,HG00369,HG00349,NA20512,NA12776,NA12272,HG00148,NA19248,NA12827,HG00362,NA20531,NA20773,HG00126…	241	0	0	1
	1	10457238	AtoG	-	NA20507,NA20757,NA20528,NA12273,HG00258	5	1	0	1
	1	10457243	AtoG	-	HG00178,NA20772,HG00189,HG00160,HG00278,NA20513,HG00373,NA12144,HG00106,HG00117,NA20512,NA07000,HG00100,NA12005,HG00329,NA20771,HG00268,NA12761,NA18505,HG01789,NA20525,NA19153,NA18917,NA20508,HG00361,NA20538,HG00311,NA12778,HG00262,NA20814,NA12272,HG00257,NA12760,NA12045,HG00234,NA12282,NA11894,HG00338,NA20509,NA20790,HG00382,NA20773,NA20539,NA19200,NA20514,HG00267,NA07051,NA06986,NA20544,HG00096…	271	1	1	1
	1	10457249	AtoG	-	NA20808,HG00137,HG00139,HG00242,HG00129,HG00177,NA20507,NA19119,HG00101,NA20752,NA20503,NA12762,HG00122,NA20516,NA11918,HG00133,HG00251,HG00105,NA18916,HG00344,NA20807,HG00274,NA20534,HG00276,HG00125,NA12154,NA19117,NA06989,NA20539,NA19144,HG00364,HG00261,NA12045,NA07357,HG00136,HG00178,HG00117,NA20586,NA20757,NA20812,NA12144,NA20512,HG00188,NA18870,NA19213,NA19118,HG00366,HG00246,NA20796,NA19153…	236	1	1	1
	1	10457250	AtoG	-	NA20586,HG00188,NA20502,NA11830,NA20531	5	1	0	1
	1	10457252	AtoG	-	NA20797,HG00338,NA20502,NA20766,HG00369,NA12341,NA20504,HG00150,NA06984,HG00257,NA20757,HG00178,HG00326,HG00321,NA11881,NA11892,HG00258,HG00133,NA18916,NA12348,HG00148,NA20589,HG00331,NA12272,HG00344,HG00325,HG00231,HG00108,NA12813,HG00240,NA20507,NA12287,NA20808,HG00264,HG00099,NA11930,NA11832,NA18505,NA20543,HG00096,NA20519,HG00121,NA07048,HG00129,HG00137,NA07347,HG00139,NA12234,HG00120,NA18517…	53	1	1	1
	1	10457256	AtoG	-	HG00111,HG00245,NA11840,NA12275,HG00309,NA12776,NA12286,NA12874,NA20774,NA19197,HG00158,HG00344,HG00130,HG00138,HG00240,NA11894,HG00337,HG00149,HG00361,HG00266,HG00380,HG00116,HG00118,NA12829,NA18498,HG00189,NA12489,NA12005,NA12273,NA12873,NA10851,NA20505,HG00346,HG00264,HG00343,HG00188,NA19213,HG00246,NA12761,NA12750,NA20796,NA19153,NA18488,NA11995,HG00121,HG00329,HG00263,HG00114,HG00381,NA20507…	286	1	1	1
	1	10457257	AtoG	-	NA20812,NA12827,NA20773,NA12814,HG00120,NA20803,NA11918,HG00159,HG00256,NA11992,HG00281,NA12383,NA12044,HG00326,NA19248,NA20525,NA19113,NA20800,NA20761,NA20814,NA20538,NA11893,HG00360,NA18908,HG00356,HG00373,NA12043,HG00102,HG00331,NA19116,NA19198,NA20517,HG00383,HG00262,NA18870,HG00362,HG00369,NA12399,NA18488,NA12750,NA12058,HG00122,HG00123,NA12761,NA11831,HG00343,HG00313,HG00376,HG00231,HG00119…	276	1	1	1
	1	10457278	AtoG	-	HG00159,HG00251,NA12044,HG00099,HG00311,HG00371,NA19210,NA20812,NA12287,NA12400,NA20800,NA20796,NA12813,HG00119,HG00353,NA12058,NA20803,HG00349,HG00383,NA12827,HG00281,NA20765,NA19213,HG00373,NA20802,NA12043,HG00100,NA11881,NA11995,NA20757,NA11931,NA20531,HG00344,NA20518,NA19096,NA07347,NA20536,HG00276,NA20505,HG00136,NA20532,HG00116,HG00138,HG00325,NA19117,HG00158,NA20530,NA20516,HG00285,NA20585…	133	1	1	1
	1	10457279	AtoG	-	NA20519,HG00335,NA11881,NA12340,HG00349,NA19213,HG00383,HG00255,HG00189,HG00265,HG00099,HG00128,NA20787,HG00371,NA12155,NA20525,HG00180,NA12044,NA20804,NA20800,NA18511	21	1	0	1
	1	10457295	AtoG	-	HG00269,HG00128,NA12155,NA20503,HG00364,HG00261,NA12144,NA19118,HG00178,NA20541,NA12890,HG00366,NA20787,NA20514,NA11892,NA20516,HG00133,HG00278,HG00188,NA20812,NA19210,HG00120,NA12814,NA20773,HG00099,HG00262,NA19198,NA19096,HG00176,HG00187,NA07000,NA20532,HG00384,HG00327,HG00145,NA20539,NA20502,HG00108,NA18923,NA12340,NA12717,NA12812,NA12778,HG00331,NA11832,NA20801,HG00244,HG00268,NA19116,NA10847…	285	1	1	1
	1	10457305	AtoG	-	NA20802,HG00122,NA12287,NA20787,NA19213,HG00369,HG00128,HG00327,NA20532,NA19117,NA20540,NA20585,NA11930,NA20586,NA12829,HG00310,HG00139,NA20790,HG00180,HG00160,HG00256,NA20773,HG00362,NA20513,NA19210,NA12827,HG00099,HG00154,HG02215,HG00326,NA20542,HG00376,NA11829,NA20516,NA12286,NA12775,NA12874,HG00130,HG00358,NA20534,NA12763,HG00244,NA12717,NA12340,NA12489,NA11918,NA20797,NA19144,HG00150,NA12144…	98	1	1	1
	1	10457310	AtoG	-	HG00255,NA20519	2	1	0	1
	1	10457323	AtoG	-	HG00328,HG00268,HG00251,HG01789,NA20773,NA19153,NA12399,NA20586,NA18498,HG00362,HG00114,NA11894,NA12287,NA20504,HG00116,NA12890,NA12760,NA20770,NA12546,HG00383,HG00178,HG00122,HG00150,NA20536,NA18917,HG00149,NA07000,NA20518,HG00101,NA20543,HG00126,NA20761,NA11918,NA12340,NA20516,NA20800	36	1	0	1
	1	10457324	AtoG	-	HG00114,NA19197,HG00338,NA19153,HG00276,NA11930,HG00148,NA11918,NA12778,HG00244,HG00149,NA20544,HG00187,HG00128,NA12282,NA12546,HG00267,HG00268,HG01334,NA20525,HG00121,NA12043,HG00159,NA12829,HG00275,NA12287,NA20773,HG00245,NA12760,HG00335,NA20586,NA11831,NA12813,NA19144,NA11893,HG00262,HG00119,NA20543	38	1	1	1
	1	10457325	AtoG	-	HG00265,HG00275,HG00105	3	1	0	1
	1	10457326	AtoG	-	NA07051,NA11830,HG00242,NA20543,NA20814,NA20530,HG00263,HG00157,HG00122,HG00346,NA12340,HG00148,NA12813,HG00266,NA12287,HG00123,NA20802,HG00159,NA11881,NA20800,NA20532,HG00245,NA12760,HG00275,HG00128,NA19197,NA12341,NA20542,HG00181,NA12827,HG00109,NA07347,NA20806,HG00096,NA20544,HG01789,NA12043,NA12829,HG00136,NA12058,HG00137,HG00139,NA20536	43	1	1	1
	1	10457335	AtoG	-	HG00242,NA20799,NA12340,HG00263	4	1	0	1
	1	10457346	AtoG	-	NA19096,NA20519,NA12546,HG00362,HG00346,NA12341,HG00343,NA20530,NA07000,NA07051,HG00138,NA12275,NA12842,HG00114,NA20544,NA12827,HG00159,NA11830,NA20828,NA20534,NA20502,NA12814	22	1	0	1
	1	10457399	AtoG	-	NA19213,NA19197,NA20828,HG00310,NA20771,NA12043,HG00309,NA11829,HG00257,HG00265,NA12874,NA18517,NA20772,HG00121,NA12400,HG00123,HG00179,NA20797,NA07000,NA20814,HG00328,NA20543,HG01791,NA10851,NA12546,NA12873,HG00346,NA11840,HG00264,NA20807,NA12275,NA12342,HG00373,HG00376,HG00122,HG00380,HG00258,HG00148,NA18511,NA20800,NA20534,HG00138,NA12761,HG00250,NA12750,HG00282,HG00119,HG01334,NA11831,NA20518…	135	0	0	1
	1	10457406	AtoG	-	NA12340,NA12043,NA20530,NA11831,NA12873,HG00114,NA20787,NA18923,HG00111,HG00133,NA07048,HG00158,NA12762,NA12763,HG01789,HG00343,HG00321,NA11830,NA12874,HG00159	20	1	0	1
	1	10457414	AtoG	-	HG00099,NA20815	2	0	0	0
	1	10457428	AtoG	-	HG00130,NA20773,NA11831,NA12058,NA12761,HG00310,NA12400,HG00313,HG00262,NA20528,NA19198,NA12814,HG00245,NA19210,NA12874,NA20517,NA18870,HG00111,HG00251,HG00099,NA12273,HG00282,HG00364,NA12144,NA20799,NA12155,HG00311,HG00145,HG00250,NA18517,HG00234,NA12234,HG00257,HG00263,NA20531,NA20804,NA19114,NA12045,NA12043,NA12399,NA20752,HG00159,NA20815,NA18488,NA20771,HG00123,HG00233,NA11894,NA11830,HG00373…	183	1	1	1
	1	10457429	AtoG	-	NA20772,NA12814,HG00364,NA19198,NA20519,HG00282,NA12287,NA20505,HG00284,HG00266,HG00335,NA12873,HG00328,HG00119,HG00259,NA20543,NA12762,HG00105,HG00158,NA10847,HG00380,HG00122,NA11931,NA12234,NA12340,NA12156,NA19114,NA20509,NA12750,NA07347,NA06986,HG00100,NA20525,HG00371,NA06984,HG00111,NA20802,NA11994,NA11881,NA20517,HG00309,HG00344,NA12775,NA12045,HG00263,NA20516,NA20518,HG02215,HG01334,HG00137…	82	1	1	1
	1	10457447	AtoG	-	HG00108,NA19118,NA12889,NA20804,NA19248,NA06986,NA12776,NA20771,NA12716,NA20815,NA12399,HG00269,NA18916,HG00384,NA20765,NA19200,NA12156,HG00335,NA19197,HG00117,HG00157,HG00259,NA18502,HG00111,NA12286,HG00356,NA11994	27	1	1	1
	1	10457451	AtoG	-	NA19116,HG01791,NA11994,NA11894,HG00100,HG00154,NA12154,HG00138,HG00369,NA12043,HG00188,NA06985,NA12813,NA19118,HG00268,NA18916,HG00251,NA20532,HG00338,HG00282,HG00265,HG00117	22	1	0	1
	1	10457455	AtoG	-	HG00263,NA20518,NA19198,HG00356,NA12400,HG00130,NA12286,HG00245,HG00111,HG00251,NA11829,HG00349,HG00274,NA18502,HG00234,NA12043,NA20807,NA12275,HG00373,NA19197,NA20828,HG00117,HG00313,NA12058,HG00154,NA12234,HG00099,HG00369,HG00256,NA12763,NA11994,NA12814,NA07048,NA18498,HG00266,NA20773,HG00321,HG00177,HG00276,HG00338,NA11893,NA12842,NA20512,HG00269,HG00366,NA12813,HG00242,HG00102,NA06986,HG00384…	141	1	1	1
	1	10457456	AtoG	-	NA19118,NA20532,HG00117,NA12829,HG00102,NA20828,NA20765,HG00346,HG00255,NA06986,HG00242,NA10851,NA12043,NA12813,HG00114,HG00265,NA12842,NA12156,NA20796,NA11893,NA20519,NA19144,HG00258,NA18511,NA20800,NA20512,NA12399,NA12814,NA20773,HG00263,NA20518,NA12286,HG00251,NA11829,NA18502,NA19248,HG00259,HG00338,NA20530,NA12144,HG00256,HG00154,NA20752,NA20812,HG00126,NA12889,HG00328,NA10847,NA18916,HG00150…	52	1	1	1
	1	10457468	AtoG	-	HG00109,NA20518,HG00138,NA20815,HG00269,NA12154,HG00321,HG00251,NA20528,NA12716,HG00157,HG00356,NA12814,HG00117,HG00259,HG00150,NA12842,NA12546	18	1	0	1
	1	10457469	AtoG	-	NA12842,HG00119,NA18498,HG00133,NA19198,NA11893,HG00231	7	1	0	1
	1	10457470	AtoG	-	NA20528,HG00330,NA19200,HG00114,HG00258,HG00269,HG00325,NA19114,HG00369,NA07357,HG00099,NA12342,NA20812,HG00188,HG00262,NA12234,NA07051,NA11893,NA20519,NA20803,HG00119,NA12775,NA18505,NA12776,HG00133,NA12842,NA20502,NA12761,NA12282,NA20772,HG00275,NA20796,HG00149,NA18517,HG00360,NA20516,HG00137,HG00285,NA06985,NA18908,NA12154,NA20797,NA12716,HG00108,HG00187,HG00268,NA20527,HG00244,NA19118,HG00313…	140	1	1	1
	1	10457481	AtoG	-	HG00321,HG00262,NA20804,NA18498,HG00105,NA11831,NA11992,HG00111,HG00369,HG00231,NA12155,NA12776,NA19114,NA10847,NA20772,HG00150,NA11994,NA20543,HG00109,NA18502,HG00343,HG00338,HG00259,HG00256,HG00177,NA20509,NA12286,NA12342,NA20815,NA19198,NA12400,HG00251,NA20516,NA20505,NA20521,HG00117,NA12716,NA20828,HG00188,NA18923,NA19144,HG00362,HG00276,NA18916,NA20519,HG00157,NA20797,NA12156,NA19248,NA20527…	67	1	1	1
	1	10457490	AtoG	-	NA18908,HG00114,NA20505,HG00123,NA20814,NA19248,HG00157,NA20527,HG00338,HG00313,NA19114,HG00149,HG00136,NA20796,HG00251,NA20772,NA12282,NA12761,NA20815,NA19096,NA20544,NA11992,HG00131,NA18505,NA20803,NA11829,NA20773,NA11831,NA19118,NA18916,NA12814,HG00130,NA19197,NA18923,HG00360,HG00327,HG00328,NA12156,NA20509,NA19198,HG00109,NA12874,NA18498,HG00138,NA12043,HG00117,NA06986,HG00262,HG00346,NA20513…	52	1	0	1
	1	10457493	AtoG	-	HG00240,HG00268,HG00356,NA06986,NA11832,NA10847,NA12716,NA11893,NA18916,HG00234,NA20534,NA20586,HG00338,NA11831,NA19198,NA20516,NA11994,HG00117,HG00346	19	1	1	1
	1	10457501	AtoG	-	NA20534,NA12829,HG00188,HG00361,NA06986,NA12546,NA20771,NA11831,NA12716,HG00282,HG00328,HG00362,NA20815,HG00262,NA12399,HG00321,HG00231,NA12842,HG00269,NA20541,HG00259,NA11995,NA11829,NA12400,NA20518,NA18498,NA12005,HG00330,NA20505,NA20502,HG00346,HG00311,NA12282,NA19197,NA20766,NA20796,NA20544,NA20828,NA20757,HG00114,NA19144,NA20519,HG00158,HG00138,NA18505,NA20543,HG00105,NA20506,HG00149,NA12775…	106	1	1	1
	1	10457507	AtoG	-	NA12287,HG00327,HG00130,NA12156,NA19118,NA12889,NA19210,NA20517,NA11992,NA12058,NA07051,HG00119,HG00313,HG00344,HG00123,NA20797,NA06985,NA18505,NA20527,NA20812,HG00106,HG00179,HG00358,HG00245,NA20807,NA12286,NA20518,HG00251,NA12272,NA18498,HG00159,NA12340,HG00150,HG00133,NA20502,HG00308,HG00187,NA19117,NA20516,NA20772,NA12282,NA20532,NA18908,NA18923,NA11930,NA19096,NA12717,NA19114,HG00276,NA12776…	195	1	1	1
	1	10457510	AtoG	-	NA12874,NA12286,NA20828,NA19197,NA06984,HG00117,HG00263,NA19198,HG00105,HG00360,NA12156,HG00382,NA19144,NA20800,HG00327,HG00240,HG00269,HG00255,NA12154,NA12775,HG00285,NA20532,NA19116,NA20804,HG00309,HG00133,NA12546,NA12043,NA11894,NA12273,NA12347,NA11994,HG00109,NA18505,NA18489,HG00376,NA12716,HG00179,HG00118,NA11829,NA20521,NA20806,HG00338,HG00265,HG00373,NA18923,NA20765,HG00111,HG00114,HG00245…	204	1	1	1
	1	10457516	AtoG	-	NA18916,NA12813,HG00157,NA20812,NA12399,HG00261,HG00186,NA20543,HG00138,HG00325,NA20530,HG00159,HG00358,NA12234,NA10847,HG00311,HG00384,HG00326,NA20534,NA12045,NA19114,NA20803,HG00233,NA20804,NA20505,NA20517,NA12750,NA18502,NA12154,NA11881,HG00361,NA11995,HG00255,HG00321,NA12814,HG00285,HG00282,NA20506,HG00099,HG00246,NA20525,NA19118,NA12889,NA12827,NA07051,NA20797,NA11894,NA20765,HG00177,HG00111…	95	1	1	1
	1	10457529	AtoG	-	HG00118,NA20518,NA12842	3	1	0	1
	1	10457530	AtoG	-	HG00349,HG00326,HG00187,HG00137,NA19096,NA12889,HG00251,NA20543	8	1	0	1
	1	10457538	AtoG	-	NA18498,NA20771,HG00149,HG00349,NA20586,NA12763,NA12287,NA20814,NA19116,NA20531,NA19096,HG00361,NA11881,NA20815,NA19092,HG00272,NA11992,HG00119,HG00264,NA19114,NA20812,HG00328,NA18489,HG00331,NA19184,NA20505,NA20502,HG00267,NA12775,NA11893,NA12489,NA19207,NA20516,NA07048,HG00178,NA19200,HG00133,NA20799,HG00159,NA20766,NA20765,HG00362,HG00246,HG00130,NA20773,NA11930,NA12399,HG00158,HG00244,NA11995…	80	1	0	1
	1	10457540	AtoG	-	NA20509,NA11918,NA20797	3	1	0	1
	1	10457554	AtoG	-	NA12155,NA12005,NA19144,HG00109,NA18923,NA20502,NA12347,NA11894,HG00309,NA12286,HG00280,HG00139,HG00366,HG00117,HG00282,HG00099,NA20540,NA12763,NA11831,NA19096,HG00131,NA20770,HG00272,NA11992,NA20804,NA20815,NA20513,NA20585,NA11832,HG00246,HG00138,NA19184,NA12813,HG00313,NA12750,NA19116,NA10851,HG00331,NA11995,HG00123,NA06985,HG00335,NA07051,NA19200,HG00244,HG00151,HG00262,HG00325,NA12058,NA20530…	56	1	0	1
	1	10457556	AtoG	-	NA11830,HG01791,HG00188,NA20797,NA18916,HG00151,NA12287,HG00123,NA12776,NA20534,NA12155,NA12873,NA06986,NA18488,HG00108,NA20509,HG00281,NA19116,NA11832,NA12144,HG00361,HG00331,HG00335,HG00369,NA19184,HG00148,HG00099,NA12763,NA12341,HG00358,NA20531,NA18917,HG00118,NA11829,NA20806,HG00187,NA07357,HG00189,NA12716,HG00265,HG00111,NA20765,HG00245,NA12286,NA12874,NA06984,NA20518,NA20802,NA12717,HG00325…	248	1	1	1
	1	10457566	AtoG	-	HG00114,NA07051,HG00151,HG00364,HG00119,HG00188,NA19114,HG00272,HG00326,NA11992,NA20770,NA20517,NA12761,HG00131,HG00268,HG00245,NA12286,NA06984,NA20518,NA19197,NA18498,HG00309,NA20771,HG00266,NA12716,HG00117,NA07048,NA12546,HG00356,NA19207,HG00122,HG00138,NA12399,NA20512,NA20796,HG00338,HG00258,HG00344,HG00133,NA20541,HG00242,NA12005,NA20519,NA18505,HG00337,NA20528,NA06986,HG00369,NA18517,NA20540…	254	1	1	1
	1	10457571	AtoG	-	HG00126,HG00109,HG00311,NA12546,HG00108,NA11995,HG00371,HG00272,HG00321,HG00258,NA12275,HG00099,NA11893	13	1	0	1
	1	10457578	AtoG	-	NA19118,HG00173,HG00269,NA20828,HG00114,NA19153,HG00246,HG00327,NA12282,NA11930,NA12156,NA12234,NA19197,HG00187,HG00366,HG00130,HG00106,HG00330,NA20506,HG00240,HG00285,HG00255,HG00311,NA18505,HG00102,NA19190,NA19248,HG00149,NA20803,NA11893,HG00349,HG00118,NA20801,NA18917,NA11831,NA12341,NA19114,NA11894,NA19149,NA19207,NA12812,HG00188,HG00356,NA19092,NA07048,NA12716,NA11830,HG00178,NA20771,NA12287…	241	1	1	1
	1	10457591	AtoG	-	NA19198,NA12546,NA20534,NA20521,NA12775,NA20814,NA19116,NA12489,HG00338,HG00117,HG00313,HG00328,HG00122,HG00319,NA20538,NA12234,HG00176,NA20513,NA20519,NA11995,NA20516,NA18502,NA12399,HG00150,NA11832,HG00353,NA12814,HG00360,NA12340,NA20757,HG00262,NA12282,HG00121,NA20772,HG00138,NA11840,NA18488,NA20803,NA11994,HG00148,HG00280,NA12155,HG00130,NA07347,HG00327,NA20543,HG00246,NA20815,HG00264,NA20505…	71	1	0	1
	1	10457596	AtoG	-	NA20517,HG00263,NA20532,HG00187,HG00233,NA20802,NA12813,HG00188,HG00137,NA19092,HG00331,HG00255,HG00131,NA20534,HG00105,HG00160,HG00128,HG00384,NA07357,HG00358,HG00101,NA07056,NA20800,HG00150,HG00256,NA20760,NA20507,NA06989,HG00371,HG00240,NA20769,NA11830,HG00151,NA19149,HG00337,NA11894,HG00330,HG00272,NA12812,NA12347,NA06984,NA20513,NA20518,NA20766,NA10847,NA20585,NA19096,NA18517,HG00269,HG00176…	266	1	1	1
	1	10457602	AtoG	-	HG00369,NA20512,NA07347,HG00244,NA18923,NA12827,NA19235,NA06986,HG00154,HG00361,HG00258,NA20506,NA19118,NA12778,HG00109,NA12750,HG00240,HG00351,NA12044,NA20769,HG00158,HG00145,HG00138,HG00284,NA20503,NA12272,NA20531,HG00276,HG00148,NA20760,NA20543,NA12144,NA20509,HG00371,NA12776,HG00176,NA06985,HG00130,NA20517,HG00233,NA12873,NA12813,HG00311,NA19207,NA18908,NA18488,NA20799,HG00267,HG00105,HG00131…	270	1	1	1
	1	10457615	AtoG	-	HG00267,HG00251,NA12761,NA11881,HG00282,NA11831,HG00325,NA12341,HG00349,NA20800,HG00189,NA18488,HG00371,NA12873,HG00131,NA12044,HG00099,NA20797,NA12763,HG00171,HG00382,HG00159,HG00108,NA11829,HG00123,NA20518,HG00119,HG00266,NA12287,HG00364,NA18498,HG00274,NA20771,NA11830,NA07048,NA12286,HG00356,NA19213,HG00259,HG00263,HG00350,NA19116,NA11832,NA20814,NA12814,HG00136,NA12348,HG00310,NA20517,HG00233…	196	1	1	1
	1	10457616	AtoG	-	NA20800,NA20806,HG00259,HG00106,NA20519,HG00120,HG00108,NA20530,NA12156,NA18489,NA20787,NA12778,HG00335,HG00176,NA12889,NA12234,HG00326,NA12058,NA19153,NA18923,NA07051,HG00173,NA12045,HG00273,NA20528,NA11894,HG00131,NA12399,NA12761,NA19144,HG00282,HG00127,NA20510,HG00136,NA20513,NA12546,NA19213,HG00111,NA20804,HG00231,HG00122,NA12348,HG00327,NA12814,HG00309,HG00330,NA07048,NA07056,HG00100,NA20772…	110	1	1	1
	1	10457621	AtoG	-	NA07357,HG00102,HG00325,HG00127,NA20502,HG00269,NA20800,NA18502,NA19213,NA20518,NA11893,HG00137,HG00350,HG00116,NA20516,HG00275,HG00268,HG00256,HG00108,NA11992,HG00240,HG00263,NA11832,HG00157,HG00309,NA11831,NA12873,NA20544,NA20803,HG00154,NA12044,NA20752,NA20532,HG00188,NA19198,HG00285,NA12827,NA12546,NA20513,HG00282,HG00369,NA12813,HG00308,HG00246,HG00138,NA20765,NA18908,NA12399	48	1	0	1
	1	10457631	AtoG	-	HG00280,NA07056,HG00384,NA18499,NA20766,NA11894,HG00101,HG00269,NA12347,HG02215,NA18517,NA06989,NA12489,NA20809,HG00160,HG00127,NA12043,HG00274,NA20527,HG00129,HG00117,NA20528,NA12750,HG00250,HG00313,HG00256,NA12546,NA20802,NA20757,HG00176,HG00246,NA20828,HG00366,NA12813,NA20770,NA20507,NA12716,NA20787,HG00331,NA18489,NA20530,NA12842,HG00150,HG00356,NA12286,HG00262,NA12341,NA11994,NA20532,NA20502…	228	1	1	1
	1	10457632	AtoG	-	NA20519,HG00382,HG00137,NA19118,NA11832,NA20534,HG00138,HG00263,NA12282,HG00358,HG00120,NA20512,HG00325,HG00349,NA19197,NA18923,HG00258,NA19184,NA20527,NA18916,NA11830,HG00151,HG00188,HG00338,NA19114,NA20796,HG00384,NA12045,HG00326,HG00231,HG00257,NA20517,HG00276,NA20815,NA20586,HG00131,NA12763,HG00232,HG00240,HG00117,HG00256,NA19198,HG00159,HG00171,HG00108,NA12044,HG00255,NA12058,NA12873,HG00267…	158	1	1	1
	1	10457634	AtoG	-	HG00276,NA18489,NA19117,NA11831,NA20808,HG00149,NA20510,HG00310,NA12873,NA18488,NA20509,HG00128,NA12716,HG00127,HG00109,NA12812,NA12874,HG00369,NA12155,NA11840,NA12347,NA11894,HG01334,NA12776,NA20502,HG00384,NA19144,NA12340,NA12760,HG00266,NA07051,NA18498,NA20518,HG00265,NA07056,NA20809,HG00160,HG00360,HG00245,NA11829,HG00273,NA20765,HG00111,NA20806,HG00187,NA20516,HG00327,HG00264,HG00275,HG00118…	221	1	1	1
	1	10457640	AtoG	-	NA20766,HG00311,NA12750,HG00119,NA20771,NA18488,HG00250,HG00264,HG00321,HG00233,NA20521,NA11930,HG00133,NA20807,HG00349,HG00114,NA18923,NA19213,NA12842,NA20800	20	1	0	1
	1	10457652	AtoG	-	HG00101,HG00344,NA11840,HG00160,NA07347,NA12761,HG00126,NA12340,NA19207,HG00326,NA18908,HG00119,NA20521,NA19198,HG00255,NA12287,NA20760,NA20518,HG00117,NA20534,HG00148,HG00257,HG00256,HG00187,NA20505,HG00234,NA11893,NA12829,NA20544,NA12286,NA11831,HG00276,NA20814,HG00261,NA12399,HG00178,HG00371,HG01334,NA20773,HG00131,NA07048,NA12275,NA11830,NA11894,NA20787,NA12813,NA19184	47	1	0	1
	1	10457671	AtoG	-	NA10851,HG00127,NA12874,NA11830,HG00362	5	0	0	0
	1	10457919	AtoG	-	NA12890,HG00233	2	1	0	1
	1	10457923	AtoG	-	HG00126,NA20826,NA12830,NA20542,NA19184,HG00261,NA20759,NA12890,NA10851	9	1	0	1
	1	10457925	AtoG	-	NA20757,HG00263,NA20768,HG00250,HG00257,NA20761,HG00146,NA12005,NA06989,NA12750,HG00335	11	1	0	1
	1	10457935	AtoG	-	HG00282,NA11831,HG00276,NA12716,NA20814,HG00372,HG00183,NA20803,NA19107,NA19118,HG00129,HG00232,HG00116,NA11892,HG00123,HG00132,NA12546,NA20800,HG00137,NA20807,HG00157,HG00257,NA18923,HG01791,NA20541,HG01790,HG00332,HG00235,NA18870,NA20815,NA20790,HG00268,NA12761,HG00099,NA10847,NA12842,HG00121,NA19198,NA20589,NA12814,HG00108,HG00329,HG00350,NA12830,HG00118,NA07048,NA18917,NA12155,NA20525,HG00369…	259	1	1	1
	1	10457939	AtoG	-	HG00344,NA19198,HG00262,NA20581,NA20528,NA19131,HG00123,HG00245,NA20520,NA20800,NA11930,HG00277,NA12827,HG00380,NA20539,HG00183,HG00280,NA12347,HG00232,NA11881	20	1	0	1
	1	10457941	AtoG	-	NA18873,HG00235,NA20540,NA06989,HG00329,NA20530,HG00371,NA11830,NA19210,NA11881,HG00123,NA20586,HG00188,HG00362,HG00159,NA20528,NA18502,NA19147,HG00278,NA11893,NA20539,HG00328,HG00285,HG00353,HG00342,HG00148,NA19129,NA20752,HG00335,NA10851,HG00174,HG00272,NA19214,NA20754,HG00105,NA20802,NA20769,HG00349,NA20806,NA20826,HG00136,NA11994,HG01334,HG00378,NA20527,NA12762,HG00379,NA19223,HG00311,HG01789…	268	1	1	1
	1	10457955	AtoG	-	HG00262,NA20542,HG00313,NA07048,NA20769,HG00346,NA20538,NA11918,NA12287,NA12762,HG00233,HG00109,HG00105,HG00179,HG00319,NA20757,NA12275,HG00182,HG00251,NA12827,HG00151,HG01334,NA20543,HG00269,NA19149,HG00344,NA20804	27	1	0	1
	1	10457963	AtoG	-	NA20540,NA12775,HG00182,NA12273,NA20766,HG00285,HG00262,NA20758,HG00110,HG00126,HG00117,NA20530,NA19107,NA06989,NA19153,NA12829,HG00186,NA19210,HG00272,NA19108,HG00277,HG00281,NA20754,HG00119,NA20768,NA12272,NA12827,NA10851,NA12763,NA20512,HG00259,NA20808,HG00328,NA20752,NA12813,HG00155,NA19197,NA12761,NA20505,NA18934,NA11930,HG00180,NA20581,NA18517,NA20760,HG00160,HG00306,NA20521,HG00118,HG00264…	140	1	1	1
	1	10457968	AtoG	-	NA18510,NA20766,NA11830,NA19144	4	1	0	1
	1	10457976	AtoG	-	HG00118,HG00262,HG02215,HG00233,HG00146,NA20802,HG00129,HG00250,HG00121,HG00243,HG00114	11	1	0	1
	1	10457977	AtoG	-	HG00237,NA06989,NA20530,NA12750,HG00139,NA12827,HG00235,HG00150,NA12760,HG00148,NA18510,NA07347,HG00285,HG00121,HG00159,HG00309,HG00313,NA20543,NA20535,HG00373,HG00366,NA20518,HG00271,NA12813,NA20766,HG00369,HG00250,HG00356,HG00177,NA12286,NA20581,HG00262,HG00117,HG00233,NA11893,HG00146,NA20531,NA20757,NA19107,HG00372,HG00131,HG00345,NA12348,NA18489,HG00324,NA19117,NA12890,NA20525,NA12889,HG00136…	79	0	0	1
	1	10457980	AtoG	-	NA19214,NA11930,NA11829,NA20542,NA20809,HG00110,HG00123,NA20790,NA20815,NA12287,NA18870,HG00142,HG00332,HG01790,NA20541,NA12154,NA20772,HG01791,NA11918,HG00268,HG00321,NA12776,HG00236,NA19256,HG00238,HG00155,HG00308,HG00362,HG00324,NA12812,HG00267,HG00180,NA18934,NA19117,HG00275,HG00099,NA11892,NA19197,HG00232,NA20581,HG00133,NA10847,HG00182,NA11830,NA18916,NA07056,HG00341,HG00096,NA19129,HG00160…	322	1	1	1
	1	10457981	AtoG	-	NA20589,HG00261,NA07347,NA19143,HG00250,NA20507,NA20530,HG00332,HG00378,HG00148	10	1	0	1
	1	10457988	AtoG	-	HG00179,HG00364,NA20512	3	1	0	1
	1	10457993	AtoG	-	NA12286,NA19256,NA20768,NA20814,HG00339,HG00235,HG00384,HG00350,NA19147,HG00353,NA18510,NA20787,NA18916,NA11830,NA19098,HG00188,NA10851,NA12383,HG01789,HG00171,HG00364,HG00158,HG00282,HG00269,HG00266,NA20585,HG00263,HG00121,HG00236,NA20507,HG02215,HG00250,NA20819,HG00149,NA12874,NA20772,NA20754,HG00280,NA11893,NA20801,NA20756,HG00257,NA06989,NA20508,HG00233,HG00131,HG00176,NA19207,HG00129,HG00278…	61	1	1	1
	1	10457995	AtoG	-	HG00319,HG00154,NA20503,NA20826,HG00180,HG00159,NA20585,NA20773,NA12348,HG00342,NA12874,NA12827,NA19210,HG00361,HG00187,NA20513,NA11881,NA12272,NA20790,HG00121,HG00384,HG00276,HG00346,NA19147,HG00373,HG00148,NA20752,HG00267,NA12842,NA20504,NA12144,HG00273,HG00329,HG00284,NA12282,HG00150,NA19256,NA11995,HG00189,NA20540,HG00321,NA12760,NA18923,HG00326,HG00106,HG00324,HG00146,NA10851,HG00369,NA20510…	325	1	1	1
	1	10458006	AtoG	-	HG00261,NA20761	2	1	1	1
	1	10458010	AtoG	-	NA12155,NA11894,NA12776,NA18502,NA11995,NA20504,NA20752,NA11994,HG00346,HG00356,NA12814,HG01334,HG00121,HG00271,HG00250,NA12156,HG01791,HG00336,HG00158,NA19223,HG01790,HG00142,NA18511,NA20828,HG00366,HG00100,HG00178,NA20518,HG00275,HG00353,NA20814,HG00118,NA19095,NA19131,NA11829,HG00155,NA20773,NA19143,HG00379,HG00273,HG00236,NA07048,HG00189,NA20508,HG00131,NA18489,NA12761,HG00109,NA12812,NA20589…	223	1	1	1
	1	10458015	AtoG	-	HG00309,NA12287,NA18873,NA11930,HG00232,NA20768,NA20819,HG00366,NA20773,HG00335,HG02215,NA20757,HG00236,HG00237,NA20506,HG00378,HG00158,NA18489,HG00096,HG01790,NA11892,HG00344,NA12776,HG00233,NA20814,NA11894,HG00313,HG00131,NA19117,HG00235,NA18510,NA20581,HG00137,NA11994,HG01789,HG00266,HG00182,HG00154,HG00250,HG00129	40	1	0	1
	1	10458044	AtoG	-	HG01791,HG00243,HG00237,NA11830,NA19198,NA19207,HG01334,NA20756,HG00137,NA12890,NA20800,HG00233,NA20812,HG00324,HG00154,HG00342,HG00364,HG00159,NA20796,HG00362,NA12830,NA20769,NA20540,HG00345,NA12347,NA20534,HG00384,HG00129,NA20589,HG00160,NA18489,NA19206,HG00313,NA12813,NA18873,NA19149,HG00188,HG00180,NA12287,HG00148,HG00280,HG00284,HG00120,HG00266,HG01790,NA12750,NA11840,HG00178,NA20519,NA18511…	99	1	0	1
	1	10458213	AtoG	-	HG00160,NA06989,HG00313	3	1	0	1
	1	10458631	AtoG	-	NA11995,HG00325,NA07357,NA20540,NA18502,NA20811,NA20530,HG00139,HG00109,NA12761,HG00189,HG00111,HG00180,HG00379,NA12813,HG00238,HG00236,HG00327,NA19143,NA20765,NA19095,NA19131,HG00360,NA20802,HG00373,HG00114,NA18870,HG00280,NA20544,NA20803,NA19189,HG00259,HG00364,NA19102,HG00320,NA19108,NA20585,HG00369,NA11881,NA19213,HG00187,NA20513,HG01334,NA19159,NA18517,NA19153,HG00356,NA12814,NA12347,HG00119…	207	1	0	1
	1	10458635	AtoG	-	NA12827,NA19256,NA12762,HG00373,NA19119,HG00234,NA12249,NA20519,NA11995,NA20513,HG00111,NA11930,HG00138,HG00336,NA20507,HG00358,NA20508,NA20588,NA20815,NA12830,NA20772,HG00145,HG00106	23	1	0	1
	1	10458644	AtoG	-	NA07056,NA20585,HG00132,NA12400,NA11840,HG00187,NA11930,NA20502,NA19131,NA12341,NA20812	11	1	0	1
	1	10458654	AtoG	-	HG00338,HG00273	2	1	0	1
	1	10458663	AtoG	-	HG00233,HG00111	2	1	0	1
	1	10458667	AtoG	-	NA19153,HG00328,HG00136,NA19143,HG00338,NA06985,HG00375,NA19119,NA06989,NA12348,NA12272,NA12249,HG00268,NA20765,NA11829,HG00159,NA12813,NA11881,HG00149,NA06986,NA12347,HG00335,NA20828,NA20541,NA20790,NA07347,NA12827,NA20815,NA20502,HG00336,NA20586,NA11832,NA19223,NA12762,NA20503,HG00138,HG00132,NA11992,HG00280,HG00111,NA19092,HG01791,HG00160,NA19114,HG00349,NA07357,NA20761,NA20806,NA20521,HG00236…	67	1	0	1
	1	10458671	AtoG	-	HG00360,HG00111	2	1	0	1
	1	10458676	AtoG	-	NA20765,NA12340,NA20803,HG00338,HG00187,NA20766,NA11994,NA12347,NA20528,NA20797,NA20790,HG00315,NA18908,HG00267,HG00158,HG00331,HG00277,NA20544,HG00236,HG00358,HG00139,HG00242,HG00375,NA19209,HG00369,NA07000,HG00278,HG00379,NA19256,HG00268,NA20757,NA20814,HG00356,NA20761,NA20774,NA20754,NA12005,HG02215,NA19143,NA20772,NA20543,HG00176,NA12400,HG00138,NA12287,NA20504,HG00276,NA18933,NA11840,NA12272…	83	1	0	1
	1	10458677	AtoG	-	NA18517,NA20796,NA11881,NA19096,NA20521,NA12889,NA20771,NA19092,HG00236,HG00154,NA11832,NA12399,HG00189,HG00277,NA19160,NA20510,NA18508,HG00267,NA19197,NA18498,NA07347,NA12750,NA20828,NA12272,HG00159,HG00379,NA12813,NA11992,HG00268,NA20586,NA11931,NA20505,NA20514,NA20758,HG00349,NA19248,HG00306,HG00361,NA19102,HG00142,HG00336,HG00281,HG00126,HG00256,NA12006,HG00280,NA12341,HG00117,NA06985,NA11830…	125	1	0	1
	1	10458699	AtoG	-	NA12827,NA12341,HG00123,NA07000,NA20514,HG00320,HG00189,HG01791,NA07347,NA19098,NA12750,HG00127,HG00130,NA12890,NA12873,NA20828,NA19116,NA18933,HG00150,NA12272,HG00243,NA20504,NA19185,NA12287,HG00274,HG00327,HG00358,NA19092,NA20803,HG00236,NA19153,NA20521,NA20812,NA11931,HG00126,HG00146,HG00159,HG00313,NA20799,NA20806,NA20519,NA07056,NA11992,NA19248,NA20757,HG00251,NA12775,NA19160,HG00108,HG00278…	204	1	0	1
	1	10458703	AtoG	-	NA20581,NA20531,NA19207,HG00111,NA19119,HG00114,NA20514,HG00148,NA20814,NA20811,HG00132,NA20787,NA20528,NA19153,NA20772,NA12005,NA19108,NA19197,HG00174,HG00108,NA12760,NA20766,NA07347,NA20542,NA18498,HG00331,NA11840,HG00158,NA12342,NA20828,NA19102	31	1	0	1
	1	10458712	AtoG	-	NA19098,NA19207	2	1	0	1
	1	10458715	AtoG	-	NA18498,HG00133,NA18508,NA19213,NA12156,NA20528,HG00097,NA12776,NA07051	9	1	0	1
	1	10458716	AtoG	-	NA12761,NA20544,NA11992,NA07347,NA20814,NA11995,HG00109,HG01791,NA20581,HG00281,HG00376,NA19256,NA19114,NA18923,NA12043,NA12156,HG00118,NA11840,NA20528,NA20521,HG00235,HG00138,NA18933,NA18916,HG00274,NA19214,NA18499,NA20509,NA20826,NA12776,HG00179,NA12234,HG00311	33	1	0	1
	1	10458717	AtoG	-	HG00372,HG00138,NA20826,NA18933,HG00235,NA18499,NA20806,NA20802,NA12761,NA18923	10	1	0	1
	1	10458718	AtoG	-	NA12340,NA19214,NA20588,NA12154,NA12275,HG00281,HG00343,HG00177,HG00276,HG00369,NA12282,HG00236,HG00259,NA12776,HG00250,HG00179,NA20797,NA20806	18	1	0	1
	1	10458721	AtoG	-	NA20787,NA19096,NA20586,NA19147	4	1	0	1
	1	10458730	AtoG	-	HG00237,NA12760,NA12006,NA20581,HG00273,HG01334,NA12234,HG00178,NA20509,NA19147	10	1	0	1
	1	10458732	AtoG	-	HG00251,NA20542	2	1	0	1
	1	10458733	AtoG	-	NA19153,NA12827	2	1	0	1
	1	10458740	AtoG	-	NA12004,HG00183,HG00338,NA12873,HG00234,NA19108,NA19114,NA19098,NA12156,HG00380,NA11829,HG00273,HG00180,HG00099,NA18923,NA20812,NA19138,NA06985,NA12234,HG00105,HG00243,NA12874,HG00176,HG00127,NA20508,HG00256,NA20772,NA12286,NA12043,NA19116,NA06989,NA19095,HG00306,NA20518,NA20799,NA20544,NA12762,HG01334,NA19159,HG00139,HG00369,HG00126,NA20802,NA20797,NA12842,HG00356,NA19131,NA12400,HG00284,NA11894…	144	1	0	1
	1	10458750	AtoG	-	NA12399,HG01791,NA20543,NA20516,NA12275,NA11995	6	1	0	1
	1	10458755	AtoG	-	NA19131,NA12006,NA12842,NA11995,HG00376,NA18498,NA19198,NA20531,NA12546,NA20530,HG00109,NA19256,NA18908,NA20585,NA19129,NA12814,HG00188,HG00180,NA19114,HG01791,HG00343,HG00382,HG00276,NA20504	24	1	0	1
	1	10458764	AtoG	-	NA20505,HG00105,HG00276,NA12043,NA20807,HG00380,HG00117,NA12814,NA20766,NA20754,NA11830,NA12775,NA20761,HG00154,NA12044,NA19200,NA07357,NA12813,NA20532,HG00133,NA20508,NA18908,NA12287,HG00159,HG00131,HG00106,HG00258,NA11992,NA20541,NA07051,HG00382,NA12340,NA12342,NA18520,HG00362,HG00242,HG00356,NA20815,HG00243,NA19095,NA19197,NA18917,HG00375,HG00259,NA07347,HG00343,HG00335,HG00338,HG00121,NA19147…	113	1	0	1
	1	10458769	AtoG	-	NA19209,NA20544,NA11840,NA12286,NA20543,NA19138,HG00127,NA20507,NA11832,HG00375,NA18917,NA12760,HG00366,HG00259,HG00373,NA20812,HG00343,HG00158,NA19200,HG00271,HG00138,NA19198,NA07000,NA12287,NA11931,NA20509,HG00114,NA11992,NA19144,HG00280,NA20803,NA12842,NA18508,NA11881,HG00315,NA12347,HG00361,NA19141,NA11994,HG00325,NA12829,HG00188,NA20765,NA12156,HG00105,HG00183,NA19147,NA19131,NA11893,NA20801…	68	1	0	1
	1	10458774	AtoG	-	NA07000,NA18502,HG00284,NA19213,HG00237,HG00132,HG00315,NA20519,NA18933,HG00258,NA20544,HG00320,HG00150,HG00179,NA20503,HG00243,NA12775,HG00138,HG00271,HG00313,HG00334,NA07056,NA12830,HG00146,HG00362,NA20509,NA20802,NA19209,NA20513,NA12778,HG00158,NA20811,NA20586,HG00131,NA20581,NA12144,HG00331,NA12873,NA19108,HG00234,NA12005,NA12156,HG00176,HG00380,NA20525,HG00183,HG00099,HG00187,HG00108,NA12234…	209	1	0	1
	1	10458787	AtoG	-	HG00325,HG00262,HG00109,NA11829,NA20772,NA19213,NA20525,HG01791,HG00328,NA19098,NA19131,NA18498,HG00366,NA12144,HG00101,HG00108,HG00320,HG00097,NA19190,NA18499,NA18908,NA12813,HG00117,NA20528,NA20803,NA19200,NA12154,HG00114,NA20534,HG00127,NA12286,NA20519,NA12775,HG00131,HG00188,NA20543,NA12873,NA20513,NA20758,NA20757,NA20787,NA20530,HG00126,HG00315,NA20771,NA19138,NA19189,HG00245,NA20802,NA20532…	53	1	0	1
	1	10458788	AtoG	-	NA20586,NA12156,NA12348,NA12761,HG00309,NA12154,HG00123,NA12760,HG00100,NA12750,NA11840,HG00105,HG00127,HG00245,HG00126,HG00366,NA12282,NA19256,NA20771,NA19197,HG00328,NA20581,NA12813,NA12287,HG00349,NA11831,NA12234,NA20812,HG00315,NA19213,HG00097,NA20811,NA12004	33	1	0	1
	1	10458801	AtoG	-	NA18923,NA12004,NA20543,NA11831,NA19116,NA12813,NA20528,NA20797,HG00274,NA07051,HG00321	11	1	0	1
	1	10458804	AtoG	-	HG00251,NA19160,NA12829,NA07051,NA19147,NA12775,NA12144,NA19213,HG00154,HG00373,NA11840,HG00097,NA18916,NA19214,NA20826,NA19144,HG00114,HG00256,NA11930,HG00306,NA12890,NA12004,NA19248,HG00376,NA20516,NA20513,HG00133,NA20757,HG00117,HG00369,NA20797,HG00380,HG00315,HG00244,HG00101,HG00262,NA18505,NA20505,HG00106,NA11995,NA20528,HG00159,HG00320,NA20761,NA11830,NA20811,NA12347	47	1	0	1
	1	10458810	AtoG	-	NA12340,HG00309,HG00183,NA11894,NA19119,NA12778,NA20811,HG00244,NA19197,HG00139,HG00320,HG00243,NA12286,NA11995,NA19147,HG00321,HG00313,HG00097,NA20766,NA20801,HG00100,HG00236,NA12341,HG00117,NA20508,HG00119,NA18505,NA12045,NA11893	29	1	0	1
	1	10458816	AtoG	-	NA12890,NA11832,HG00123,NA06989,NA12750,NA19248,HG00372,NA19213,HG00127,HG00325,HG00233,HG00343,NA18498,HG00146,HG00313,NA18488,NA20757,NA12873,HG00105,HG00369,NA18870,HG00251,NA12761,NA20754,HG00159,NA12043,NA11930,NA12399,HG00178,NA19256,NA12044,HG00277,NA20530,NA06986,HG00331,NA12045,NA11831,NA18908,NA20528,HG00273,NA19092,NA20505,HG00119,NA12144,NA19131,NA12778,NA11830,NA20542,NA20589,NA12760…	137	1	0	1
	1	10458818	AtoG	-	HG00183,NA20811,NA18505,NA20534,NA20814,NA12489,HG00127,NA11995,NA20771,HG00123,NA20530,HG00188,NA12045,HG00284,HG00126,NA12156,HG00327,HG00245,NA11992,HG00263,HG00180,NA19114,HG00315,HG00309,HG00360,NA12340,NA18933,NA20815,HG00338,HG00142,HG00328,NA19190,HG00114,NA20797,HG00150,HG00382,NA18502,NA12006,HG00273,NA12043,HG00369,NA18520,NA19160,HG00145,NA12275,HG00362,NA18870,HG00366,NA07347,NA18917…	59	1	0	1
	1	10458826	AtoG	-	HG00313,HG00328,NA18933,NA19131,NA19119,NA11840,NA12760,NA11931,HG00118,NA12814,HG00269,HG00129,HG00187,NA12156,HG00349,NA12272,NA20542,NA12144,NA20506,HG00261,NA11930,HG00133,NA19198,NA12762,HG00160,NA19160,HG00320,NA20588,NA19116,NA20757,NA20799,NA07051,NA20581,HG00105,NA19129,HG00325,HG00188,HG00372,NA20815,NA11832,HG00273,HG00235,NA20796,HG01334,NA19114,NA20589,HG00101,NA11830,NA12813,NA11995…	135	1	0	1
	1	10458847	AtoG	-	HG00154,NA20796,NA12340,HG00335,NA20525,HG00118,HG00133,NA07347,NA20799	9	0	0	0
	1	10458918	AtoG	-	HG00311,NA11992,NA19116,NA20585,NA12154,HG00276,HG00360,HG00158,NA20814,NA12889,HG00258,HG00159,HG00114,NA11894,HG00179,NA20534,HG00256,HG00269,HG00366,HG00361,HG00139,NA11930,NA07051,NA19117,NA12043,NA12341,HG00325,NA18511,HG00188,HG00262,HG00155,HG00277,NA19096,NA12348	34	1	0	1
	1	10458919	AtoG	-	NA20589,NA12058,HG00102,HG00123,NA20514,HG00344,NA06986,NA12889,HG00158,HG00250,NA11831,NA12154,NA20770,NA11992,NA20585,NA20543,NA19197,NA18916,NA11840,HG00237,NA19159,HG00277,HG00261,NA06989,NA12155,NA11930,HG00308,NA12778,HG00358,HG00259,HG00242,NA19119,HG01791,HG00137,NA20518,HG00366,NA20803,HG00151,HG00269,HG00109,NA19213,NA12234,HG00117,HG00309,HG00126,NA12282,NA18933,HG00267,HG00356,NA12813…	145	1	0	1
	1	10458925	AtoG	-	NA20531,HG01334,NA20799,NA12282,HG00102,NA12043,NA20581,HG00258,HG00148,HG00100,NA11992	11	1	0	1
	1	10458941	AtoG	-	NA11831,NA20589,NA20790,HG00137,HG00127,NA20770,HG00179,HG00123,NA19096,HG00256,NA19198,HG01334,NA11893,NA07000	14	1	0	1
	1	10458945	AtoG	-	NA18511,HG00180,NA20799,NA19198,NA18870,HG00327,NA20543,NA19153,HG00133,NA12400,HG00256,NA11829,NA12762,HG00263,NA20534,HG00251,NA20508,HG00114,NA12489,NA19141,HG00321,NA20506,HG00101,HG00383,NA20521,HG00309,NA20588,NA12045,HG00233,HG00154,NA12341,NA12750,HG00102,HG00267,NA12873,HG00262,HG01791,HG00182,NA12287,NA12043,HG00277,HG00261,NA20814,HG01334,NA12058,NA11881,NA20770,NA12827,NA12272,HG00099…	170	1	0	1
	1	10458949	AtoG	-	NA20801,HG00242,HG00269,HG01791,HG00349,NA12058,HG00308,HG00128,NA20581,NA19207,HG00328,NA20757,HG00373,NA12282,HG01334,NA11829,NA19213,HG00285,HG00309,HG00330,NA12043,NA11894,HG00256,HG00189,NA18923,NA11992,NA12813,HG00182,NA20534	29	1	0	1
	1	10458958	AtoG	-	HG00233,HG00235,NA20531	3	1	0	1
	1	10458968	AtoG	-	NA12045,HG00234,NA20521,HG01791	4	1	0	1
	1	10458981	AtoG	-	HG00234,NA18908,HG00188,HG00251,NA12776,NA20506,NA12286,HG00309,NA20826,HG00366,NA18917,HG02215,NA19119,HG00356,HG00119,NA12750,NA07357,NA19160,HG00101,HG00117,NA20508,HG00149,NA18870,NA20768,HG00311,NA12156,NA12058,HG00258,HG01334,NA19144,HG00238,HG00256,NA20769,NA18923,HG00187,HG00335,NA11892,NA20812,HG00321,HG00308,HG00138,HG00151,HG00114,NA12275,NA20589,HG00177,NA20797,NA20521,HG00276,HG00330…	68	1	0	1
	1	10458985	AtoG	-	NA20812,NA19256,NA12716,HG00180,NA20802,HG00373,NA20531,NA20581,NA11831,NA20769,NA20541,NA19096	12	1	0	1
	1	10458991	AtoG	-	NA12776,HG00100,NA20543,NA19153,NA20516,HG00133,HG00327,NA12400,NA19144,NA11894,HG00361,HG00123,NA20506,NA20802,HG00251,NA20534,NA18908,HG00234,HG00360,NA20541,HG00263,NA18923,HG00127,NA12006,HG00256,NA12341,HG00380,NA11829,NA20772,NA12762,NA20761,HG00131,HG00160,HG00383,NA11994,HG00280,NA12286,HG00138,HG00335,NA20768,NA11892,NA20812,HG00321,HG00187,NA12814,NA18870,NA19198,NA20519,NA12156,HG00311…	209	1	0	1
	1	10458999	AtoG	-	HG00328,HG00114,HG00265	3	1	0	1
	1	10459007	AtoG	-	NA20771,NA18508,NA20802,NA18908,NA18923,NA07357,HG00127,HG02215,NA11831,NA20516,NA12156,HG00360,HG00234,HG00242,NA20801,NA20828,HG00237,HG00136,HG00369,NA11930,HG00178,NA12155,NA12842,HG00276,HG00154,NA12716,HG00267,HG01791,NA07347,HG00285,NA12287,HG00261,NA20790,HG00182,HG00277,NA20543,NA12272,NA07051,NA12043,HG00159,HG00324,HG00187,NA11893,NA12814,NA19117,HG00149,NA12234,NA20506,HG00180,HG00105…	195	1	0	1
	1	10459017	AtoG	-	HG00255,NA20507,HG00361,NA12842,NA07357,NA12043,NA11893,NA12778,HG00117,NA19223,NA12287,NA20812,HG00323,NA20513,NA12813,NA19114,NA12489,HG00313,NA11995,HG00325,HG00371,NA12058	22	1	0	1
	1	10459022	AtoG	-	HG00158,HG00105,HG00267,NA18908,NA20796,NA12716	6	1	0	1
	1	10459031	AtoG	-	NA19114,NA07357	2	1	0	1
	1	10459032	AtoG	-	NA19223,HG00138,HG00325,NA12776,NA20513	5	1	0	1
	1	10459057	AtoG	-	HG00117,HG00105,HG00180,NA20807,NA12716,NA18498,NA11994,HG00138,NA19116	9	1	0	1
	1	10459072	AtoG	-	NA06986,NA19114	2	1	0	1
	1	10459091	AtoG	-	NA19159,NA12761	2	1	0	1
	1	10459104	AtoG	-	NA12814,NA20802,NA20796,HG00277,NA12889,NA20509,NA19248,NA20771,NA18908,NA20581,NA19159,HG00309,NA18511,HG00138,NA20803,NA19223,HG00321	17	1	0	1
	1	10459105	AtoG	-	NA12814,NA11893,HG00136,NA20801,HG00321,NA18511,HG00338,NA12716,NA20528,HG00117,NA12873,NA19116,NA12775,HG00313,NA20802,NA12776,HG00105,NA18908,NA07357,NA20771	20	1	0	1
	1	10459126	AtoG	-	NA12156,NA11893,HG00105,NA20765,NA18916,HG00234,NA12287,HG00330,NA18498,HG00338,HG00133,HG00137,HG00325,NA20803,NA20541,NA12889,HG00139,NA19116,NA12750,NA12275,NA20769,HG00369,HG00114,NA12144,NA20588,NA20512,NA11832,HG00331,HG00117,NA12058,NA06986,NA19213,HG00138,NA07357,NA12775,HG00111,NA19248,NA20509,HG01791,HG00321,HG00238,HG01334,NA11995,NA20797,NA12814,NA12716,NA20796,NA11992,NA19114,NA20802…	52	1	0	1
	1	10459127	AtoG	-	NA06986,NA07357,NA20814,NA12275,NA07000,NA20534,NA12814,HG00105,NA18498,NA12058,HG00369,NA20509,NA20513,NA12287,NA18908,HG00114,HG00234,HG00277,HG00139,NA12400,HG00338,HG00119,NA10847,NA20796,NA12761,NA12156,HG00117,HG00237,HG02215,NA12776,NA19213	31	1	0	1
	1	10459133	AtoG	-	NA18908,NA12814,NA19159,NA12716,NA11995,NA06986,NA12873,NA18511,NA20588,HG00133,NA20534,NA18870,NA20512,NA19144,NA12400,NA12762,NA20796,HG00114,HG00180,NA19160,NA11992,NA07000,NA12287,HG00313,HG00330,NA20581,HG01791,NA18498,NA07357,NA07347,NA10847,NA20513,NA12156,NA11831,HG02215,NA12776,NA20769,HG00119,NA20528,NA18916,NA20765,NA20801,HG00105,NA19248,NA20509,NA12761,HG00136,NA20814,NA12842,NA20771…	78	1	0	1
	1	10459135	AtoG	-	NA11894,NA19144	2	1	0	1
	1	10459143	AtoG	-	NA20512,NA20771,NA19114,NA12775,NA20769,HG00139,NA11992,NA12340,NA20532,NA11994,NA12750,HG00133,HG00180,NA12762,NA12400,NA20803,NA12058,NA20581,HG00313,HG00234,HG00238,NA12889,HG00105,HG00331,NA12776,NA20802,HG01791,NA20796,NA06986,NA07357,HG02215,NA12287,NA19116,NA20588,NA18498,NA20534,HG00277,NA11894,NA12716,NA12873,NA18511,NA12275,HG00321,HG00309,HG00330,NA20528,HG00117,NA12761,NA11881,HG01334…	81	1	0	1
	1	10459218	AtoG	-	HG00234,NA19144,NA12400,HG00325	4	0	0	0
	1	10459757	AtoG	-	HG00181,NA18508,NA12043	3	0	0	1
	1	10459789	AtoG	-	HG01334,NA20504,NA12286,HG00157,NA20769,HG00129	6	1	0	1
	1	10459799	AtoG	-	NA20756,NA12546,HG00122	3	0	0	0
	1	10459807	AtoG	-	HG00323,HG00315,HG00383,HG00235,NA11840	5	1	0	1
	1	10459817	AtoG	-	NA18916,NA12286,NA12044,HG00131,NA12762,NA20787,HG00380,NA12154,NA12383,NA20504,NA12827,HG00315,NA12004,HG01791,NA19108,NA11832,NA12760,NA12287,NA18508,NA20544,NA07051,NA07048,HG00174,HG00179,HG00383,NA20814,HG00320,HG00187,HG00345,NA11920,NA12813,HG00324,NA10851,NA11830,HG00137,HG00186,HG00371,NA19153,NA12890,HG00119,NA20800,HG00243,NA20508,NA07357,NA19198,NA11829,NA12775,NA06989,HG00378,HG00102…	161	1	1	1
	1	10459820	AtoG	-	NA19197,NA20504,NA20581,NA11992,HG00231,NA20811,HG00364,NA20531,NA20508,NA11840,HG00369,NA12890,HG00259,HG00186	14	1	0	1
	1	10459825	AtoG	-	HG00238,NA20581,HG00136,NA20538,NA20588	5	1	0	1
	1	10459830	AtoG	-	HG00142,HG00339,HG00265,NA19153,NA18510,NA10851,NA11893,HG00129,NA20802,HG00345,NA12813,HG00342,NA19190,HG00118,NA20772,HG00189,NA18498,HG00110,NA20759,NA19185,NA12874,HG00258,HG00282,NA12830,NA20807,NA20769,NA20508,HG00242,NA20530,HG00259,NA20804,HG00375,NA20790,NA18508,HG00256,NA11832,NA19108,HG00096,HG00255,NA20787,NA12286,NA18916,NA20518,HG00373,HG00160,NA12873,NA12340,NA12778,HG00111,HG00109…	179	1	1	1
	1	10459831	AtoG	-	HG00118,NA18933,HG00276,HG00327,NA12890,NA20502,NA12760,NA20772,NA18873,HG00323,HG00146,HG00235,HG00306,HG00155,HG00236,NA19200,HG00105,NA12762,NA20768,NA20504,NA12383,HG00133,NA12058,HG00240,NA12775,NA18499,NA11840,HG00358,HG00132,HG00139,NA11995,HG00319,NA20809,NA20761,HG00244,HG00177,HG00136,NA20799,HG00353,NA20538,NA18502,NA06989,NA20811,NA11918,NA19095,NA18520,NA07048,NA20814,HG00181,HG00275…	286	1	1	1
	1	10459843	AtoG	-	NA12043,NA19160,HG00133,NA07347,NA20801,NA12750,HG00125,NA20796,NA20765,NA19198,NA18508,HG00271,NA20588,NA20797,HG00321,NA12234,NA20518,NA19138,HG00342,NA12272,NA20811,NA19102,HG00335,NA20519,NA11995,HG00188,NA20585,NA12813,NA18916,HG00331,NA12273,HG00119,HG00238,HG00313,HG00278,HG00274,NA18873,NA20589,HG00366,HG00378	40	1	0	1
	1	10459847	AtoG	-	HG00266,HG00121	2	1	0	1
	1	10459852	AtoG	-	NA20756,NA20502,NA20774,HG00174,HG00269,NA12043,NA19184,NA20785,NA12058,NA06989,HG00240,HG00327,NA20811,HG00236,HG00328,NA19095,NA19210,NA12005,NA19200,HG00155,HG00278,NA19129,HG00142,HG00364,NA11994,NA12890,NA20588,NA20800,NA18499,NA11840,HG00324,NA12272,NA10851,NA11893,NA19185,NA20543,HG00128,NA12234,HG00109,HG00273,HG00149,NA19092,NA20771,NA20525,HG00336,NA12275,HG00130,HG00180,NA12273,NA19159…	73	1	0	1
	1	10459853	AtoG	-	HG00375,NA20531,HG00180,NA20544,HG00259,NA19198,HG00336,NA20771,NA12830,NA19092,NA20530,HG00383,NA20518,NA20525,HG00323,HG00332,NA07056,NA12044,NA20504,HG00131,NA12383,HG00096,HG00263,HG00186,NA20508,NA12004,NA19153,NA11832,NA20787,NA20796,NA18870,NA20769,NA12489,NA12750,HG00125,NA18520,HG00349,HG00334,NA07048,HG01334,HG00378,NA20514,HG00335,NA12762,HG00384,NA20519,HG00146,NA20800,HG00275,HG00268…	151	1	0	1
	1	10459855	AtoG	-	NA19159,NA19095,NA18520,HG00328,HG00334,NA07048,HG00179,NA20814,HG00320,NA10847,HG00181,HG00360,NA12156,HG00275,NA18917,HG00321,HG00281,HG00346,NA18923,HG00127,NA07357,NA12761,NA20758,NA19209,NA20540,NA20528,HG00277,NA20506,NA20581,HG00128,NA19207,HG00188,NA20819,HG00313,NA12273,NA19197,HG00278,NA20768,NA11992,NA12043,HG00187,HG00174,NA19185,HG00110,NA12874,NA20761,NA20772,HG00154,NA12342,NA07051…	274	1	1	1
	1	10459875	AtoG	-	HG00180,NA20531,NA12762,NA11881,HG00242,NA11832,NA18917,NA18502,NA19095,NA20756,HG00275,HG01334,NA20519,NA19108,NA19116,NA18870,NA18508,NA11918,NA12716,NA12830,HG00146,NA20807,NA07056,NA12058,NA12282,NA20588,NA20538,HG01791,NA20828,HG00139,HG00271,HG00109,HG00284,NA20815,HG00238,HG00137,NA12341,HG00233,HG00116,HG00127,NA20796,NA11995,HG00346,HG00149,NA20811,HG00277,NA19256,NA19209,NA12776,HG00371…	161	1	1	1
	1	10459879	AtoG	-	HG00101,HG00277,NA20787,NA12827,NA19256,NA11918,HG00371,HG00335,NA19185,NA11920,NA11893,NA19129,NA12155,NA18498,NA19213,HG00110,NA19153,NA20541,NA20531,NA20514,NA12762,NA19095,NA12842,NA20513,NA20811,NA19143,HG00231,HG00236,HG00242,NA18917,NA12717,HG00266,NA12340,NA20808,NA11830,NA11992,NA20797,HG00364,NA20544,HG00360,HG00244,HG00145,HG00118,HG00276,HG00328,NA19160,NA20761,NA20589,NA19149,HG00263…	165	1	0	1
	1	10459889	AtoG	-	NA20541,NA20585,HG00244,NA20508,HG00240,HG00342,NA11994,NA12286,NA12005,HG00129,NA12058,HG00315,NA12813,HG00123,HG00271,NA20815,HG00110,NA20531,HG00332,NA19143,NA20502,NA20514,NA19095,HG00231,NA18502,HG00236,HG00178,HG00284,HG00320,NA18917,NA11881,NA19098,HG00139,HG00126,HG01791,HG00275,HG00102,HG00259,HG00375,HG00105,NA20544,NA20530,NA11918,NA12830,NA20771,HG00331,HG00145,NA20586,HG00366,HG00101…	149	1	1	1
	1	10459890	AtoG	-	HG00178,NA19138,HG00240,HG00179,HG00321,NA20508,NA19160,HG00324,NA20519,NA20803,NA20769,HG00376,NA20771,NA11995,HG00278,HG02215,HG00267,NA20589,NA20800,HG00364,NA19129,NA12340,HG00121,NA12043,NA20540,NA12155,HG00187,HG00131,NA12716,NA19209,NA12154,HG00236,NA19116,NA11881,NA19107,HG00378,HG00114,NA12342,NA19098,NA18873,NA12005,NA06989,HG00174,NA12874,NA19159	45	1	0	1
	1	10459893	AtoG	-	NA19190,NA19210,NA19209,HG00267,HG00356,NA20530,NA10851,NA19129,HG00101,NA11995,HG00276,NA11832	12	1	0	1
	1	10459894	AtoG	-	NA11995,NA20504,HG00383,NA19102,NA12005,HG00132,HG00378,HG00345,HG00353,NA19210,NA20509,NA12873,NA12286,HG00244,NA12760,NA20774,HG00129,HG00155,NA20531,HG00328,HG00110,NA18508,NA20815,HG00139,NA12272,HG00364,HG00376	27	1	0	1
	1	10459895	AtoG	-	HG00133,NA12760,NA19223,NA11829,HG00271	5	1	0	1
	1	10459896	AtoG	-	NA19190,NA12004,HG00263,NA20790,HG00110,HG00118,HG00339,NA12341,NA12234,NA19159,NA18499,NA20765,NA20803,HG00121,NA20800,NA18520,NA19160	17	1	0	1
	1	10459899	AtoG	-	HG00271,NA19096	2	1	0	1
	1	10459912	AtoG	-	NA19207,NA11881,NA12760,HG00383,NA19185,NA20808,NA20772	7	1	0	1
	1	10459913	AtoG	-	NA11992,NA11994,NA20531,HG00306,NA11920,NA11829,HG00109	7	0	0	1
	1	10459916	AtoG	-	HG00361,HG00383,NA12058,NA12045,HG00271,HG00188,HG00114,HG01334,NA19210,NA19108,HG00136,HG00130,NA18508,HG00371,NA12813,NA19198,NA12004,NA07357,NA12873,HG00127,HG00280,NA07347,NA20514,NA12044,NA19185,HG00360,HG00238,HG00315,NA20520,NA12342,HG00180,HG00129,NA07048,NA20519,NA20768,NA20756,NA12275,HG01789,NA20796,HG00109,NA12842,NA11829,HG00233,HG00119,HG00139,NA18520,NA11995,NA19095,HG00380,NA12775…	177	1	0	1
	1	10459918	AtoG	-	NA12489,NA18870,HG00264,NA20585,NA11840,HG00130,NA20797,NA20508,NA20796,HG00324,NA20586,HG00126,NA18923,HG00179,HG00127,NA18505,NA20538,HG00315,HG00180,HG00362,NA12272,NA20756,HG00331,NA20543,HG00330,NA20761,HG00269,HG00139,HG00284,NA12044,NA19207,HG00154,HG00346,HG00109,HG00265,NA12400,HG00276,NA11832,HG00155,NA20581,NA20804,NA11881,HG00128,NA12005,HG00321,NA19184,HG00243,HG00149,NA19129,HG02215…	93	1	0	1
	1	10459920	AtoG	-	NA20581,HG00189	2	1	0	1
	1	10459925	AtoG	-	NA20504,HG00282,HG00276,NA20528,HG00263,NA19107,NA20828,NA11840,HG00261,NA20796,HG00321,NA20804,NA12762,HG00186,NA20538,HG00100,HG00258,HG00345,HG00267,HG00353,NA06985,HG00366,HG00383,NA18916,NA12156,HG00325,NA12827,HG00264,HG00361,NA12340,NA20799,HG00266,NA20815,NA12282,NA19184,NA12275,HG00315,NA07056,HG00146,NA12005,HG00119,HG00128,NA06989,NA12286,NA20772,NA12058,HG00382,NA12775,NA12154,HG00281…	247	1	0	1
	1	10459972	AtoG	-	NA18499,HG02215,HG00105,HG01334,HG00306,HG00111,NA20797,NA12156,NA10851,NA20588,NA12286,NA20589,NA19197,NA19256,NA20765,NA20530,HG00364,NA20771,NA07051,HG00240,HG00137,NA12275,NA11830,HG00142,NA12058,NA19223,HG00346,NA12287,NA12341,NA20796,HG00187,HG00119,NA19095,HG00180,HG00280,NA20513,NA12750,NA19107,NA11893,HG00321,NA19159,NA12043,NA12761	43	1	0	1
	1	10459979	AtoG	-	NA20796,NA19209,HG00109,NA12340,NA20774,HG00105	6	0	0	1
	1	10459988	AtoG	-	HG00114,NA11893,NA18502,HG00315,NA20765,NA19138,NA19095,NA19108,NA20519,NA12275,HG01334,HG00371,NA12058,NA11994,NA12234,NA20588,NA20756,HG00346,NA20508,HG00259,NA19159,NA19107,NA20796,HG01791,HG00105,HG00240,NA19185,HG00328,NA19160,HG00356,NA20581,HG00384,HG00383,NA20530,NA19213,HG00100,NA19198,HG00111,NA12827,NA19098,NA20509,NA19143,NA11995,NA07357,NA12873,HG00378	46	1	1	1
	1	10460000	AtoG	-	NA19159,NA18498,NA20796,NA12873,NA20509,NA19108,NA12716,NA19160,NA19213,NA19095,HG00378,NA20508,NA20586,NA18502,NA20581	15	1	0	1
	1	10460001	AtoG	-	NA19095,NA18498,NA12234,NA20508,NA20765,NA18502,HG00384	7	1	0	1
	1	10460010	AtoG	-	NA12275,NA20509,NA19209,NA19138,NA18502,NA19095,NA07357,NA20765,NA20532	9	1	1	1
	1	10460079	AtoG	-	NA20509,NA19200,HG00240,NA12716,NA19095,NA20815,NA19198,NA19159	8	1	1	1
	1	10460082	AtoG	-	HG00110,NA11893,NA19198,NA19159,NA19095,NA12814	6	1	0	1
	1	10460088	AtoG	-	NA19098,HG00127,NA20815,NA12829,HG00325,HG00132,NA18916,HG01334,HG00110,NA19095,HG00375,NA12045,NA19200,NA20509,HG00119,NA19159,NA12716,NA06985,HG00378,HG00108,NA18502,HG00157	22	1	1	1
	1	10460096	AtoG	-	NA19159,HG00109,HG00378,HG00127,NA12829,NA20765,NA19189,HG00110,HG00234,NA11893,HG00157,HG00375,NA20509,NA18934,HG00376,NA19198,HG00309,HG00097,HG01791,HG00119,NA11831,NA12716,HG00251,NA11832,NA19108,HG00132,NA19223,HG00361,NA12045,NA19099,NA12750,HG00108,NA19257,HG00240,NA19095,HG00373,NA18502,HG00325,HG01334,NA06985,NA18916,NA20796,NA20815,NA19098	44	1	1	1
	1	10460097	AtoG	-	NA20796,NA06985,HG00110,HG00361,HG00251,NA19185,HG00157,HG00378,NA19159,NA20509,NA18502,NA12814,NA19099,HG00127,NA18916,NA11893,NA19095,NA20765,HG00309,NA11832,HG01334,HG00244,HG00325,NA19108,HG00376,HG00109,HG00119,NA12716,NA19098,HG00234,NA12829,NA12275,NA20815	33	1	0	1
	1	10460107	AtoG	-	NA12234,NA19214,NA19185,NA11893,NA20754,HG00234,NA12813,HG00137,HG00256	9	1	0	1
	1	10460117	AtoG	-	NA20505,NA20758,HG00342,NA19095,NA20796,HG00187,HG00373,NA18933,NA20513,HG00131,NA12156,HG01334,HG00183,NA20543,HG00346,NA12273,HG00137,NA19257,HG00313,NA19108,HG00330,NA19138,NA12045,HG00361,HG00309,HG00375,NA12814,NA19223,NA12750,NA20509,HG00244,NA12873,NA07051,NA11893,NA20754,NA18916,NA19198,HG00315,HG00261,NA19096,NA18505,HG00378,NA20803,NA12842,NA20528,HG00097,NA20800,NA20512,NA12829,NA12716…	62	1	0	1
	1	10460121	AtoG	-	HG00349,HG00358,NA18933,NA19138,HG00361,NA11831,HG00309,HG00187,NA20765,HG00127,HG00384,NA12763,NA19198,HG00142,HG00132,NA12045,HG00139,HG00238,NA12058,HG00319,NA20505,NA19223,HG00234,NA12874,NA20803,NA12234,NA19201,NA12716,HG00149,NA18916,NA20538,NA12873,NA07048,NA20506,HG00157,NA12842,NA18505,NA20532,NA12006,HG00380,NA20807,NA19189,NA20512,NA19108,NA19159,NA20761,HG00284,NA20519,NA19095,NA12762…	98	1	1	1
	1	10460123	AtoG	-	NA20513,NA20516,NA12234,NA20771,NA20790,NA19201,HG00277,NA06985,HG00127,NA12156,NA19209,NA18517,HG00157,NA20509,NA12273,HG00187,HG00116,NA11831,HG00272,NA12750,HG00330,HG00308,HG00137,NA19189,NA12058,HG00108,NA07000,HG00325,NA20797,HG00234,HG00097,NA19198,NA19095,HG00345,NA19207,NA19257,NA19108,NA19223,NA12874,HG00375,NA11830,NA12763,NA19160,HG01334,HG00246,NA19159,NA19098,NA20765,NA10851,NA20758…	149	1	1	1
	1	10460133	AtoG	-	NA20803,NA12762,NA10851,NA11840,NA12272,HG00111,NA19223,HG00149,NA19214,HG00328,NA19185,HG00110,HG00379,NA18934,NA18916,NA20809,HG00375,HG00154,HG00376,NA12340,NA20512,NA07051,NA07357,NA12156,NA12827,NA10847,NA20812,HG00240,NA20509,HG00183,NA18502,NA12341,HG00313,HG00137,NA07048,NA20771,HG00159,HG00342,NA06985,NA20541,NA20521,HG00320,HG00189,HG00188,NA20796,NA20801,NA07000,NA12273,NA18510,HG00280…	177	1	1	1
	1	10460145	AtoG	-	NA12156,NA20815,HG00244,NA19160,HG00315,HG00262,HG00096,NA20521,NA20538,HG00132,NA12347,NA20796,HG00306,NA20541,NA12006,HG00111,NA20756,HG00313,HG00116,NA12275,HG00263,NA12340,NA20530,NA20797,NA12716,HG00143,NA19107,NA20808,HG00321,HG00261,HG00246,NA19200,HG00369,HG00335,HG00236,HG00373,HG00139,NA18510,NA18498,NA20807,NA11893,NA20509,NA12812,HG00328,HG00155,NA19214,HG00379,NA19201,NA11930,NA20771…	147	1	1	1
	1	10460158	AtoG	-	NA11893,HG00272,NA20532,HG00238,NA19098,HG00256,HG00328,NA18933,HG00126,NA12776,HG00132,NA12156,NA19185,HG00142,HG00369,HG00246,HG01789,HG00189,HG00321,HG00349,NA12827,NA20509,HG00240,NA12812,NA20543,NA19096,HG00183,HG00342,NA19092,NA19209,HG00187,HG00311,HG00380,NA11831	34	1	0	1
	1	10460162	AtoG	-	NA11830,NA07357,NA20790,NA20505,HG00126,HG00188,HG00149,NA18498,NA20506,HG00106,HG00100,NA12874,HG00111,NA12273,NA20516,NA12814,NA19257,NA20509,HG00335,NA19200,NA19160,NA20532,NA12829,HG00326,NA12716,NA20513,HG00277,NA20543,NA20801,HG00341,HG00182,NA12272,HG00148,HG00320,HG00159,NA20758,HG00097,NA19209,NA18517,HG00187,NA20519,NA19095,NA18502,NA20754,NA20768,HG00127,NA20765,NA18520,HG01789,NA12763…	218	1	1	1
	1	10460163	AtoG	-	NA18916,NA19099,NA20757,NA19159,NA12156,NA19092,NA19214,HG00234,NA11832,HG00183,HG00259,NA12813,NA18505,HG01334,HG00238	15	1	0	1
	1	10460169	AtoG	-	HG00261,NA19107,NA20800,HG00327,NA11992,NA12044,NA12144,NA20538,NA12347,NA12889,NA20528,NA12249,HG00256,NA20828,NA12275,HG00328,HG00325,HG00373,NA20521,HG00143,HG00334,HG00330,HG00132,HG00313,NA07000,NA12341,HG00236,NA20541,NA12873,NA20543,HG00159,HG00271,NA12156,NA18934,NA20771,NA19189,HG00145,NA12813,HG00106,HG00238,NA12750,NA20516,NA20787,HG00375,HG00142,NA20826,NA11920,NA19185,NA20506,HG00361…	128	1	1	1
	1	10460176	AtoG	-	HG00256,HG00272,HG00326,NA12045,HG00378,NA19096,HG00309,HG00342,NA19138,NA20812,NA11894,NA19201,NA19108,NA12058,NA20508,NA19098,NA18505,NA12829,HG00246,NA12827,NA12812,NA06985,NA12273,NA19207,HG00183,HG00231,NA18498,NA12776,NA12043,NA20754,HG00157,HG00346,HG00188,NA20505,NA12763,HG01789,NA19159,NA20787,NA19095,HG01334,HG00265,NA20814,NA18870,NA12716,HG00266,HG00148,NA20796,HG00261,NA12044,NA12286…	117	1	0	1
	1	10460182	AtoG	-	NA07048,NA20530,NA19198,NA20812	4	1	0	1
	1	10460188	AtoG	-	HG00309,HG00321,HG00384,HG00346,NA20756,NA12045,NA20769,HG00282,NA12383,NA20800,HG00325,HG00315,HG00326	13	0	0	0
	1	10460201	AtoG	-	HG00154,HG00159,NA11992,NA12155,HG01789,HG00132,HG00116,NA20514,HG00127,HG00110,NA19185,HG00313,NA18517,HG00320,NA12272,HG00148,HG00371,NA10847,NA20519,NA07051,HG00324,NA19198,NA20541,NA18510,NA12750,NA06985,HG00315,NA12273,NA12156,NA12874,HG00183,NA20790,HG00328,NA20814,NA20768,NA19257,NA12340,HG00261,NA19159,NA19184,HG00369,NA19107,NA18505,NA12044,HG00182,HG00383,NA12249,NA20801,HG00380,HG00306…	221	1	1	1
	1	10460207	AtoG	-	HG00150,NA20756,HG00379,HG00108,NA20588,NA18934,NA07357,HG00306,NA12776,NA20505,HG00154,NA20528,NA19214,NA20543,HG00313,HG00110,NA11832,NA11830,NA12750,NA20802,NA20541,HG00127,HG00143,HG00277,NA18916,HG00345,NA18502,HG00234,HG00109	29	1	0	1
	1	10460212	AtoG	-	HG00277,NA20815,NA11893,HG00276,HG00119,NA12155,HG00137,HG00346,NA19099,HG00180,NA19209,NA18488,NA12763,HG00097,NA19095,NA12045,NA07048,HG00282,HG00281,NA12273,NA06985,NA20808,HG00246,NA19098,HG00379,HG00263,HG00234,NA20505,HG00321,HG00274,NA19092,NA11892,HG00306,HG00380,NA20796,NA20812,NA20513	37	1	1	1
	1	10460223	AtoG	-	NA12058,NA12286,HG00375,NA20754,NA18916,NA12814,NA18917,HG00380,NA11992,HG00139,HG00277,HG00358,NA20826,NA20588,NA20752,NA18934,NA11831,HG00142,HG00356,NA11893,NA12044,NA20815,NA12763,HG00119,HG00378,NA12006,NA20828,NA20800,NA19214,NA12144,HG01791,NA20505,NA10847,HG00240,HG00309	35	1	0	1
	1	10460231	AtoG	-	NA19189,NA12776,HG00325,NA12006,NA20790,NA12058,NA19223,NA19095,NA20541,NA18498,NA19198,HG01789,NA12812,NA12155,NA11830,NA11832,NA20505,NA07347,NA19159,HG00313,NA20769,HG00110,NA20543,HG00127,NA20508,HG00274,NA12813,NA19138,NA11829,HG00238,NA20799,HG00263,NA11992,NA19102,HG00342,NA19099,HG00384,HG00119,NA12546,NA11893,HG00326,NA11840,NA20807,NA12154,NA12889,HG00280,HG00319,HG00378,NA18933,HG00097…	98	1	1	1
	1	10460239	AtoG	-	NA19099,NA07051,NA20513,NA10847,NA12044,HG00126,HG00383,NA12889,NA12340,NA18498,HG00309,NA18488,HG00123,NA19207,NA11893,HG00271,NA19107,NA18933,NA20812,HG00277,NA20803,HG00325,HG00244,HG00319,HG00251,HG00375,NA19214,NA12275,NA19138,HG00328,HG00268,HG00324,NA20588,HG00234,NA20771,NA18934,NA20800,HG00131,NA12272,NA20769,NA20754,NA20752,NA11840,NA07048,NA12776,NA20538,HG00240,HG00313,HG00108,HG00336…	141	1	1	1
	1	10460243	AtoG	-	HG00234,HG00378	2	1	0	1
	1	10460270	AtoG	-	NA12043,HG00378	2	1	0	1
	1	10460271	AtoG	-	NA12156,NA07051	2	1	0	1
	1	10460272	AtoG	-	NA19099,NA19207,NA18870	3	0	0	0
	1	10460290	AtoG	-	NA12043,NA12812,NA18502,HG00251,NA11831,HG00384,NA12341,NA20796,HG00119,HG00313,NA18870,NA19209,HG00105,NA19257,HG00137,NA11840,NA20768,NA19108,HG00346,NA20538,HG00122,NA20509,NA19197,HG00262,NA20532,NA10851,NA12889,NA12234,NA12842,NA20828,NA20528,NA12347,NA20765,HG00326	34	1	0	1
	1	10460294	AtoG	-	NA12234,NA20815,HG00272,NA19197,HG00342	5	1	0	1
	1	10460296	AtoG	-	HG00119,NA20801,NA12889,NA20796,HG00139,NA20771,NA12760,HG00240,NA12347,HG00246,HG00321,HG00125,HG00346,HG00154,NA12827,HG00360,HG00373,NA12716,NA11930,NA20807,NA12873,HG00143,NA12286,NA07056,NA07347,HG00108,HG00342,NA12400,NA11832,HG00349,NA20505,HG00255,NA12058,NA20754,HG00118,HG00109,NA19095,NA19096,HG00183,NA19257,NA12763,NA20506,HG00272,HG00188,HG00111,HG00149,NA11831,HG00158,HG00259,NA20756…	53	1	0	1
	1	10460313	AtoG	-	HG00272,NA19209,NA12058,NA19099,HG00238,NA20543,NA12045,NA20796	8	1	0	1
	1	10460318	AtoG	-	HG00342,NA11893,NA19198,HG00375,HG00157	5	1	0	1
	1	10460321	AtoG	-	NA20812,NA12812,NA12750,HG00136,HG00234,NA19095,NA20508,HG00143,HG00097,NA20588,NA18502,HG00131,HG00308,HG00349,NA12762,NA07347,NA06985,NA12814,HG00123,NA12716,NA12827,NA11840,HG00122,HG00336,HG00335,HG00272,NA18933,NA19096,HG00373,NA12043,HG00238,HG00378,NA19189,NA20799,NA20543,NA19153,HG00250,HG00240,HG00342,HG00360,NA07000,HG00358,NA07056,NA18934,NA19209,HG00330,NA19092,HG00105,NA19214,NA20815…	230	1	1	1
	1	10460326	AtoG	-	HG00149,HG00188,NA18508,HG00251,NA12400,NA07357,HG00180,HG00131,HG00157,HG00346,HG00259,NA18498,NA20787,HG00116,NA19159,NA20768,NA11995,NA20803,HG00379,HG00262,HG00242,NA18517,NA20797,HG00127,HG00121,HG00246,NA12763,NA18520,HG00277,HG00378,NA18934,HG00268,HG00105,NA20756,NA19214,NA18502,NA20519,HG00097,NA20588,NA19095,NA18510,HG00101,NA12347,NA19198,HG00109,NA20758,NA11832,HG00255,NA12827,NA19207…	203	1	1	1
	1	10460328	AtoG	-	NA12286,NA20756,HG00119	3	1	0	1
	1	10460333	AtoG	-	NA20772,NA19214,HG00255,NA19149	4	1	0	1
	1	10460337	AtoG	-	HG00182,HG00101,NA12044,NA20799,NA12347,NA20802,NA12341,HG00118,NA19200	9	1	0	1
	1	10460346	AtoG	-	NA07000,HG00119,NA20513,NA20807,NA12827,NA07051,NA18917,HG00261,NA20532,HG00188,NA18502,NA20756,HG00097,NA12874,NA12814,HG00306,NA18498,HG00149,NA20581,HG00335,HG00376,NA12763,NA20828,HG00121,HG00187,HG00178,HG00250,HG00313,HG00109,NA18517,NA12154,NA20530,NA12347,NA07347,NA20812,NA20754,NA12400,NA11829,NA19257,NA20505,HG00284,NA18916,HG00356,HG00240,HG00321,NA07048,NA12760,NA19099,HG00258,NA19214…	61	1	0	1
	1	10460357	AtoG	-	NA19209,NA12286,NA19160,NA07347,NA20530,NA06985,HG00345,HG00130,NA20505,NA20506,HG00313	11	1	0	1
	1	10460361	AtoG	-	HG00376,NA20528	2	1	0	1
	1	10460366	AtoG	-	NA20530,NA19200,HG00183,NA12760,NA07357,HG00277,NA11995,NA19222,NA20771	9	1	0	1
	1	10460367	AtoG	-	HG00150,NA12874,HG01334,NA19138	4	1	0	1
	1	10460382	AtoG	-	HG00380,HG00128,HG00320,HG00262,HG00321,HG00346,HG00131,HG00180,NA20796,NA19185,HG00335,HG00261,HG00242,NA20513,NA19107,NA19207,NA20756,NA12154,HG00139,NA18498,HG00326,NA20815,NA19138,HG00097,HG00315,NA12045,NA12874,NA19153,NA19099,NA11832,NA20758,HG00306,HG00246,NA20808,NA19159,NA12044,NA20801,HG00313,NA10847,HG00376,HG00132,NA20530,HG00382,NA20803,NA18870,NA19160,HG00108,HG00282,HG00375,NA19223…	119	1	0	1
	1	10460393	AtoG	-	HG00379,NA06985,NA19108,HG01791,NA12006,HG00132,NA10851,HG00366,HG00145,HG00143,HG00119,HG00313,NA19207,HG00328,HG00262,NA20807,NA20803,HG00320,HG00187,NA20536,HG00271,HG00178,NA20541,NA12275,NA20796,HG00234,HG00250,NA20530,NA20790,NA12043,NA12342,HG00360,NA19200,HG00246,NA12144,HG00376,NA19159,NA07056,HG00384,HG00346,NA12763,NA19098,NA07048,HG00097,NA12873,NA19222,HG00242,NA19198,NA19095,NA12813…	150	1	0	1
	1	10460398	AtoG	-	NA12889,NA20803,NA20797,NA06984,HG00234	5	1	0	1
	1	10460399	AtoG	-	HG01334,HG00330,HG00375,NA10847,NA12006,NA12874,NA20530,HG00281,HG00349,NA12043,HG00154,HG00108,HG00139,HG00342,NA20543,NA12813,HG00157,HG00373,HG00111,NA11893,NA07048,HG00275,HG00259,NA18508,NA19108,HG00379,HG00326,NA19189,NA12750,NA20803,NA12889	31	1	0	1
	1	10460402	AtoG	-	NA07048,HG00143,NA20790,HG00380,NA20814,HG00128,HG00379,NA19095,HG00188,NA10851,HG00274,HG00139,HG00373,NA19108,HG00119,NA12842,NA19138,NA20812,HG00251,NA12144,NA12156,NA20756,NA12400,NA19197,HG00180,HG00384,NA19160,NA18498,NA19223,NA12234,HG01334,HG00364	32	1	0	1
	1	10460406	AtoG	-	NA12272,NA12873,NA07048	3	1	0	1
	1	10460408	AtoG	-	NA07347,HG00306,HG00119,NA10851	4	1	0	1
	1	10460422	AtoG	-	HG00149,HG00378,HG00361,NA20581,NA12154,NA18916,NA20766,NA07048,NA11829,NA19223,NA18934,HG00240,HG00131,HG00275,HG00373,NA19222,HG00137,NA19107,NA12889,NA12813,NA19149,NA20509,NA19214,HG01791,HG00335,NA20513,HG00246,NA20796,NA19108	29	1	0	1
	1	10460430	AtoG	-	HG00271,HG00263,HG00137,NA20814,NA18934,NA12750,HG00276,HG00360,NA20771,NA18916,NA20505,NA11829,NA12154,NA20766,HG00111,NA20815,HG00356,NA07048,NA20812,HG00100,NA19138,NA12286,HG00309,NA18933,NA12716,HG00101,NA12813,NA19222,NA19189,NA19095,HG00158,HG00097,NA11930,HG00262,HG00109,NA20543,NA20754,HG00364,HG00234,HG00261,NA20506,HG00122,HG00187,NA20581,HG00361,HG00143,NA12144,HG00251,NA20513,HG00110…	92	1	1	1
	1	10460441	AtoG	-	HG00366,NA19138,HG00100	3	1	0	1
	1	10460447	AtoG	-	NA12156,NA19222,HG00109,NA20528,HG00271,NA12546,NA20505,NA19107,NA07048,NA20756,HG00111,HG00100	12	1	0	1
	1	10460448	AtoG	-	HG00321,NA20797,NA19108,HG00262,NA20787,NA20812,HG00110,HG00274,NA19198,NA20513,NA19159,NA10847,NA20796,NA20771,HG00097,HG00258,HG00269,NA19096,NA12144,HG00346,NA19095,NA11930,HG01334,NA19098,NA19107,HG00276,HG00155,NA20508,HG00277,NA20765,NA19207,HG00111,HG00128,NA20505,NA18916,HG00149,HG00335,NA19099,HG00157,NA07347,NA07357,HG00328,HG00154,HG00330,NA19222,HG00375,HG00360,NA12750,NA20538,NA12760…	91	1	0	1
	1	10460456	AtoG	-	NA19198,NA11995,NA20771,NA20807,HG00237,NA20765,HG00143,NA19223,HG00328	9	1	0	1
	1	10460466	AtoG	-	NA20581,HG00139,HG00128,NA18510,NA19257,HG00242,HG00328,HG00246,NA12546,HG00149,NA18517,NA19197,HG00335,NA20787,NA12813,NA12144,HG00321,HG00097,NA20803,NA12400,NA18498,NA19138,NA12058,NA12889,NA19207	25	1	0	1
	1	10460475	AtoG	-	NA12286,HG00335,NA12814,HG00157,HG00122,NA20756,HG00126,NA12842,HG00281,HG00242,HG00321,NA19108,HG00110,NA20787,HG00376,HG01789,NA18498,NA20766,NA20803,NA20808,HG00341,HG00277,HG00148,NA12873,NA20532,HG00271,HG00379,HG00325,HG00155,NA12827,HG00143,NA19107,HG00272,HG00259,HG00263,NA12400,NA11995,HG00111,NA18502,NA12156,HG00308,HG00375,HG00309,NA12750,NA19095,NA12763,HG00180,NA07357,HG00330,NA12272…	174	1	1	1
	1	10460507	AtoG	-	NA12874,HG00277,HG00148,HG00319,NA19200,HG00345,NA12286,NA12546,HG00142,HG00250,NA19096,NA20787	12	1	0	1
	1	10460563	AtoG	-	NA20543,NA19184	2	0	0	1
	1	10460577	AtoG	-	NA11892,HG00328	2	0	0	0
	1	10460582	AtoG	-	NA20769,NA20544	2	0	0	0
	1	10460592	AtoG	-	NA11930,HG00280,HG00118,NA20530,NA20828,HG00263,NA19144,NA20536,NA11995,HG00148,HG00261,HG00268,NA20756,HG00255,NA18923,NA11992,HG00338,NA12776,HG00109,HG00132,HG00182,NA18510,HG01334,NA20800,HG00238,NA19256,NA18916,NA19257,HG00364,HG00379,NA06984,NA12045,HG00378,NA19214,NA11918,NA11920,NA19096,NA19153,HG00382,HG00237,HG00234,HG00136,NA18505,NA20585,NA20769,NA12341,NA12813,NA20774,HG00373,HG00100…	71	1	0	1
	1	10460606	AtoG	-	HG00160,HG00245,HG00142,HG00268,NA18499,NA19144,HG00236	7	1	0	1
	1	10460612	AtoG	-	HG00105,NA12889,NA12154,NA12341	4	0	0	0
	1	10460615	AtoG	-	HG00186,NA20771,HG00189,HG00327,NA19131,NA20513,NA19116,HG00105,NA20525,NA12763,NA12155,NA19222,HG01334,HG00282,NA20812,HG00372,NA20797,HG00236,HG00157,HG00384,NA20508,HG00159,HG00315,HG00127,HG00237,NA20765,HG00148,NA20758,NA20752,NA12287,NA07051,HG00146,NA12234,NA11920,NA19184,HG00262,HG00342,NA20504,HG00338,NA18873,NA19114,HG00255,HG00126,NA20790,NA20756,HG00251,NA12043,NA20760,HG00382,HG00331…	203	1	0	1
	1	10460619	AtoG	-	NA07357,NA20506,NA19147,NA20771,HG00262,HG00188,NA18917,NA18870,NA19096,HG00323,NA07051	11	1	0	1
	1	10460626	AtoG	-	NA11840,HG00376,HG00267,NA20757,HG00109,NA12829,NA07347,HG00132,HG00233,HG00335,HG00272,NA12154,HG00375,NA06986,NA11995,NA19144,HG00108,NA12156,NA12400,HG00119,NA20536,HG00240,NA10851,HG00111,NA18502,HG00258,HG00364,NA20518,HG00157,HG00379,HG00346,HG00127,NA20766,NA11881,NA19092,HG00373,HG00349,HG00324,NA20509,NA19143,NA20799,HG00097,NA20759,NA19160,NA12006,NA19147,NA12045,HG00271,HG00366,NA12761…	257	1	1	1
	1	10460627	AtoG	-	HG00097,HG00242,NA12489,NA20796,NA12717,NA19159,NA20540,HG00323,HG00328,NA12546,HG00128,HG00139,NA20541,NA19248,NA11831,NA20800,NA11830,NA20802,NA19160,NA12776,NA06986,NA12716,HG00366,NA20506,HG00306,NA06985,HG00131,HG00177,NA06984,NA20771,HG00189,HG00255,NA20513,NA19225,NA19131,NA20504,HG00282,NA20752,NA12760,HG00146,HG00262,HG00178,NA19198,HG00338,HG00231,HG00267,HG00126,NA12842,NA11893,HG00362…	202	1	0	1
	1	10460635	AtoG	-	NA11892,HG00149,HG00186,NA12348,NA20812,NA20507,HG00187,HG00345,NA20521,NA18505,HG00321,HG00337,NA20826,NA11832,HG00271,NA12873,HG00179,HG00349,NA19257,NA12546,HG00231,NA20581,HG00372,HG00378,NA20506,HG00366,NA18917,NA20542,NA19209,NA18873,NA19225,NA20528,NA19131,NA18870,HG00313,HG00099,NA19153,NA19096,HG00353,NA18909,NA20532,NA12144,HG00356,NA11920,HG00116,NA12342,NA20807,NA19141,HG00343,NA20797…	69	1	0	1
	1	10460641	AtoG	-	NA19257,HG00371,NA11830,NA20541,NA12717	5	0	0	0
	1	10460645	AtoG	-	HG00383,HG00097,NA18909,NA12286,HG00262,HG00353,HG00117,NA18923,HG00356,NA18934,NA19141,HG00242,HG00280,NA19198,NA11994,NA20531,HG00129,NA19108,HG00110,NA20828,NA12249,NA20768,NA20787,NA10851,HG00119,HG00342,NA20812,NA12873,NA11893,NA19190,NA12348,HG01789,NA12829,HG00245,HG00373,NA19114,NA20766,NA12340,HG00255,NA11894,HG01791,NA12761,NA10847,HG00108,NA12155,NA20518,HG00341,HG00187,HG00154,NA19143…	169	1	1	1
	1	10460651	AtoG	-	HG00349,HG00345,NA07000,HG00127,NA20757,NA20772,NA12045	7	0	0	0
	1	10460658	AtoG	-	HG00319,NA12775,HG00306,NA11832,NA20519,NA20508,HG00183,HG00334,HG00136,NA18505,NA20757,NA19096,HG00234,NA19153,NA12489,NA20796,NA18508,NA12812,NA12004,NA11831,NA20800,HG00332,NA18510,NA20815,HG00258,NA19160,NA20541,NA12776,HG00158,NA18511,NA07051,NA20528,NA06986,NA12716,HG00366,NA12006,NA12275,NA20506,HG00174,NA20771,NA11931,HG00189,NA20513,NA12890,NA19116,NA19225,NA20812,NA19131,HG00105,HG00186…	311	1	0	1
	1	10460662	AtoG	-	NA20536,NA11894,HG00231,NA20799,NA12873,HG00180,HG00346,HG00315,NA11832,NA07056,NA07048,HG00342,NA19096,NA07357,NA11881,NA19143,NA18917,NA11994,NA11892,NA19257,NA12762,NA19256,NA12889,HG00237,NA20765,NA19223,NA18508,NA20815,HG01334,NA20541,HG00246,HG00256,NA18870,NA20768,NA12340,HG00325,NA12348,NA18499,NA12155,NA19225,NA07051,HG00235,HG00361	43	1	1	1
	1	10460668	AtoG	-	HG00181,NA12249,NA11930,HG00121,HG00278,NA20532,HG00177,HG00105,NA20801,HG00236,NA18873,NA12155,NA12775,HG00325,NA20521,NA19197,NA20828,NA19098,NA20756,NA12340,NA07000,HG00154,NA12348,HG00382,HG00238,NA12890,HG00137,HG00131,NA19160,NA18499,NA20815,HG00258,HG00281,NA11931,NA18505,HG00319,NA18923,HG00110,NA12546,NA19131,NA12399,NA20757,NA19095,HG00331,HG00097,HG00268,NA18502,NA12275,NA20774,NA20802…	321	1	1	1
	1	10460678	AtoG	-	NA07347,NA06985,HG00373,NA19159,NA20801,NA19207,NA12287,HG00119,HG00105,HG00362,HG00233,NA11893,NA12546,NA20807,HG00099,NA19153,NA06984,NA19189,HG00179,HG00343,NA19210,NA19098,NA19099,HG00371,NA12400,HG00097,HG00136,NA11831,NA12045,HG00315,NA12340,NA19214,NA20766,NA19118,NA12043,HG00277,HG00330,HG00122,HG00372,NA20581,NA19185,NA11931,HG00281,NA12750,HG01791,NA20803,HG00256,NA20544,NA20541,HG00346…	72	1	1	1
	1	10460694	AtoG	-	NA18923,NA12043,NA12286,NA12273,HG00356,HG00281,HG00116,HG00371,HG01789,NA11930,NA20765,NA19118,NA07347,NA20769,NA20525,NA12812,NA11920,NA11931,NA20581,HG00174,HG00256,HG00361,HG00342,NA06986,HG00151,NA12347,HG00235,HG00155,NA18511,NA20772,NA20538,HG00117,NA12058,NA11992,NA19159,HG00244,NA18488,NA12889,NA19200,NA20502,NA20532,NA20801,NA19256,NA12775,NA20521,NA20828,NA20540,NA12340,HG00320,HG00285…	324	1	1	1
	1	10460697	AtoG	-	NA18508,NA19197,HG00315,NA20752,HG00097	5	1	0	1
	1	10460698	AtoG	-	HG00366,NA19222,NA06984,NA12154	4	1	0	1
	1	10460699	AtoG	-	HG00309,HG00245	2	1	0	1
	1	10460700	AtoG	-	NA12249,HG00375,NA18934,NA11894,NA20532	5	1	0	1
	1	10460701	AtoG	-	HG00234,NA11994,HG00343,HG00256,HG00149,NA11893,NA19257,NA20800,NA18917,NA20761,NA20758	11	1	0	1
	1	10460704	AtoG	-	NA12006,NA11892,NA18873,NA12275,HG00321,HG00245,NA20518	7	1	0	1
	1	10460707	AtoG	-	NA18505,NA12874,NA12750,NA20752,HG00126,HG00362,HG00149,HG00119,NA18498,NA11893,HG00129,NA20771,NA20757,HG00256,HG00383,NA12829,HG00189,HG00376,NA20518,HG00238,NA19116,NA11894,HG00326,NA12156,HG00259,HG00281,HG00330,HG00324,HG00255,NA11994,NA07000,HG00146,NA11995,NA12842,HG00096,NA12234,NA19108,NA18502,HG00320,HG00261,HG00111,HG00373,NA11918,NA19222,NA20787,HG00251,HG00174,HG00106,NA20505,HG00101…	230	1	1	1
	1	10460708	AtoG	-	HG00330,NA10851,NA12156,HG00375,NA06985,HG00118,HG00282,NA20752,NA19138,NA20797,HG00369,NA12763,NA20512,HG00272,HG00309,HG00276,NA20807,HG00321,NA19257,HG00373,HG00181,HG00099,NA18508,NA19184,NA12399,NA18502,HG00111,HG00109,HG00240,HG00126,NA20519,HG00231,NA19190,NA19102,NA18510,HG00338,NA07048,NA11840,HG00183,NA12045,NA12155,NA19147,NA20513,NA20803,NA12044,NA19096,HG00326,HG00256,NA20771,NA11892…	162	1	1	1
	1	10460709	AtoG	-	NA19143,HG00382,HG02215,HG00238,NA20797,HG00188,HG00137,HG00097,NA12762,NA12761,NA20761,NA12043,NA18873,HG00111,NA20544,NA11992,NA12750,HG00150,NA20531,NA20528,HG00245,HG00375,NA18499,HG00330,HG00276,NA12716,NA18508,HG00177,HG00187	29	1	0	1
	1	10460710	AtoG	-	HG00369,NA20536,HG00362,HG00242,HG00149,NA12400,NA12874,HG00353,HG00145,NA18917,NA20769,NA20796,NA20543,HG00180,NA12144,NA12045,HG00097,NA18934,HG00159,HG00372,HG00324,NA19184,NA20504,NA12717,NA20801,HG00267,NA11830,HG00356,HG00246,HG00309,NA12286,HG00272,NA20512,NA12043,NA12889,NA20797,NA19159,HG00244,HG00341,NA20532,NA19207,HG00240,HG00126,NA11918,NA19222,HG00320,NA18502,NA12842,NA11995,NA12489…	217	1	1	1
	1	10460713	AtoG	-	NA20812,HG00137,NA19143,NA12340,NA11840,HG00151,NA12287,NA12234,NA19198,HG00277,NA20811,HG00271,NA12717,NA18511,HG00369,NA19129,HG00320,HG00099,NA07000,HG00383,NA20800,HG00364,NA11995,HG00243,NA19256,HG00275,HG00233,HG00326,HG00325,HG00371,NA20803,HG00361,NA12399,HG01789,NA11931,NA20544	36	1	1	1
	1	10460723	AtoG	-	HG00188,HG00126,HG00325,HG00371,NA20800,NA19189,NA12763,NA10847,HG02215,NA20771,HG00240,NA20544,NA19248,NA20812,NA11992,NA11840,HG00187,NA19108,NA20519,HG00349	20	1	0	1
	1	10460731	AtoG	-	NA11894,NA20518,NA18488,HG00361,HG00129	5	1	0	1
	1	10460757	AtoG	-	HG00128,HG00180,NA12775,HG00276,HG00326,NA20513,NA12275,HG00285,NA20531,HG00119,NA12156,NA20802,NA20754,HG00328,HG00362,NA11930,NA20796,HG00338,NA19116,HG00122,HG00234,NA11995,NA20519,HG00342,NA18502,HG00132,NA20504,NA12043,HG00116,NA20766,HG00244,HG00136,HG00117,NA19159,NA11918,HG00142,NA19248,HG00149,NA19131,HG00353,NA19185,HG00126,HG00306,NA20771,HG00235,HG00259,HG00263,NA19114,NA12546,HG00356…	61	1	1	1
	1	10460762	AtoG	-	HG00383,HG00376,NA20800,HG00238,NA20802,NA12156,NA12155,NA12829,HG00313,NA20519,HG00281,NA20507,NA20812,NA07048,HG00179,NA19143,NA19214,HG00349,NA19116,HG00183,NA11931,HG00189,NA11831,NA20506,NA19225,NA12044,HG00330,NA20803,HG00256,NA19256,NA19210,HG00326,NA20530,HG00378,HG00137,HG00379,NA19096,HG00236,HG00325,NA18933,HG00110,NA12546,NA20756,HG00356,HG00336,NA12778,NA20518,NA18909,HG00150,NA18508…	250	1	1	1
	1	10460765	AtoG	-	HG00149,NA12399,NA19223	3	1	1	1
	1	10460792	AtoG	-	NA19225,NA18502,HG00313,NA19256	4	0	0	1
	1	10460795	AtoG	-	NA20757,NA18511	2	1	0	1
	1	10460800	AtoG	-	HG00243,NA19189,NA19143,HG00335,NA20532,NA20765,NA18873,NA12716,HG00108,HG00099,NA20807,HG00105,NA12058,NA20800,HG01334,NA20508,NA20507,HG00320,NA20766,NA20519,HG00338,NA20530,NA20528,HG00119,HG00349,NA19197,NA19108,HG00111,NA20761,NA12813,HG00258,HG00117,NA20513,NA18511	34	1	0	1
	1	10460801	AtoG	-	NA12234,NA19143,HG00349,HG00137,HG00378,NA12347,NA19248,HG00117,HG00150,HG00139,NA20528,HG00336,HG00356,NA12761,HG00276,HG00364,NA06986,HG00119,HG00280,HG00384,NA20508,NA20541,NA20758,HG00346,NA18873,HG00373,NA20754,HG00111,NA19118,NA20581,NA19102,HG00126,NA12399,NA20801,NA19131,NA18488,NA20812,NA19214,HG00328,HG00366,NA19197,HG00238,NA20800,NA20771,NA19138,HG00371,NA12045,NA19108,NA20532,NA12006…	67	1	1	1
	1	10460809	AtoG	-	NA18909,NA19099,HG00323,NA20512,HG00369,HG00143,HG00234,NA20757,NA19129,NA18916,NA19256,NA20532,HG00313,NA12813,HG00238,NA19257,NA20507,HG00139,HG00154,NA20799,HG00379,NA19160,NA12717,NA20506,HG00189,NA20765,NA20543,NA19102,NA19131,NA19143,NA20513,NA18873,NA20508	33	1	0	1
	1	10461020	AtoG	-	NA19225,NA20505	2	0	0	1
	1	10461024	AtoG	-	NA18909,HG00117,HG00109	3	0	0	1
	1	10461037	AtoG	-	HG00117,HG00309,NA19159,NA18499,NA19189,NA20505,NA20765,NA19098,HG00321,HG00183,NA12842,HG00131,NA12144,NA12829,NA19107	15	1	1	1
	1	10461047	AtoG	-	HG00127,NA20588,HG00326,NA19092,HG00242,HG00117,HG00142,NA20765,NA12400,NA18502,NA12750,HG00373,NA12814,NA19107,NA19095,HG00372,HG00321,NA10847,HG00255	19	1	0	1
	1	10461069	AtoG	-	HG00099,NA20527,HG00338,NA19190,HG00242,NA18912	6	1	1	1
	1	10461073	AtoG	-	HG00338,NA12045,NA20754,NA19223,NA19116,NA20524,NA12889,NA18486,NA18505,NA19190,NA19138,HG00138,NA12156,HG00373,NA18912,HG00097,NA19144,NA20786,HG00180,NA19108,HG00105,NA20513,NA18511,HG00355,NA11994,NA12234,NA12716,NA19143,NA06986,NA20503,HG00183,NA19248,HG00309,NA19175,NA12144,NA19225,NA19160,NA20800,HG00365,HG00315,HG00240,NA19172,NA18498,NA18916,NA18934,HG00188,NA12815,HG00117,NA19184,NA20534…	76	1	1	1
	1	10461085	AtoG	-	HG00117,HG00255	2	1	0	1
	1	10461105	AtoG	-	NA18498,HG00234,NA12234,NA12275,NA19107,HG00231,HG00364,NA19197,NA19116,NA19256,NA19225,HG00180,NA12283,NA12873,NA19206,NA19114,HG01791,NA20812,HG00097,NA19159,NA11829,NA19214,NA19131,NA19118,NA12750,NA19095,HG00255,NA18870,HG00127,HG00139,NA20796,NA20765,HG02215,NA20527,NA20754,HG00136,NA20509,NA19175,NA19108,NA19200,NA18511,NA12814,NA19222,NA18489,HG00343,NA20786,NA18934,HG00138,HG00240,NA19172…	93	1	1	1
	1	10461113	AtoG	-	NA12399,HG00349,NA07051,NA19143,NA12234,HG00326,NA19131,HG00240,NA20754,NA12716,HG00372,NA19118,NA18934,HG02215,HG00375,NA18498,NA19171,NA19095,HG00358,HG00277,NA11992,HG00361,NA19257,HG00238,HG00139,HG00143,NA19098,NA12058,HG00136,HG00378,NA19185,NA20589,NA19213,NA12872,NA18499,HG00244,HG00142,NA20826,NA20803,HG00105,NA20503,HG00365,HG00343,NA07347,NA18489,HG00111,HG00116,HG00187,NA06986,NA19198…	165	1	1	1
	1	10461115	AtoG	-	NA19160,HG00271,NA12275,HG00349,NA12399,NA11994,HG00142,NA12154,NA19116,NA07051,NA11894,NA06986,NA12156,NA20800,NA20521,NA12762,NA18499,NA19131,NA19143,HG00373,HG00126,HG01334,NA12234,NA20803,NA12489,NA12006,NA19209,NA19159,HG00255,NA20754,NA19114,HG00346,NA19189,NA19257,HG00139,HG00240,NA18870,NA20769,NA20812,HG00338,NA19256,HG00117,NA20543,HG02215,HG00383,NA11893,NA18502,NA19095,NA18511,HG00127…	56	1	1	1
	1	10461139	AtoG	-	HG00181,NA12760,HG00099,HG00313,NA12762,HG00285,HG00262,NA12813,NA12761,HG00234,NA19160,NA11894,HG00331,HG00139,HG00378,HG00232,NA20543,HG00110,NA10847,NA20801,NA19222,HG00343,NA19248,NA07048,NA19131,NA19144	26	0	0	1
	1	10461143	AtoG	-	NA12341,NA11830,HG00267,HG00099,NA11840,NA19146,HG00257,HG00355,HG00132,NA20582,NA12004,NA18510,HG00367,HG00343,NA12005,NA19129,NA20761,HG00365,NA20766,NA07347,NA11930,NA19172,NA12272,NA12155,NA20810,HG00271,NA12489,NA20765,NA20805,NA18907,NA18910,NA12717,NA19204,HG00263,HG00117,NA20801,HG00341,HG00188,NA20790,NA12812,NA12413,NA19235,NA20828,NA07056,NA20514,HG00323,HG00239,HG00356,NA12761,HG00336…	381	1	1	1
	1	10461166	AtoG	-	NA12813,HG00342,NA06984,NA20807	4	1	0	1
	1	10461180	AtoG	-	HG00335,NA12156,NA20814,NA20589,NA19185,NA12827,HG00143,HG00238,HG00109,NA11843,HG00325,NA18505,NA12829,HG00376,NA11829,HG00183,NA07048,NA19213,NA19248,NA12777,NA12546,HG00181,HG00141,NA20521,HG00313,NA18916,NA19159,NA19204,NA20502,NA11881,NA06994,NA20757,NA12282,NA20808,NA19096,NA12249,NA20508,NA19201,NA12814,HG00114,HG00258,NA20786,NA20528,HG00383,HG00345,HG00159,HG00263,NA18907,NA20810,NA12815…	291	1	1	1
	1	10461181	AtoG	-	HG00232,NA12775,HG00252,NA12058,NA20507,NA20826,HG00137,HG00379,HG00376,HG00157,NA19213,NA19248,NA07048,HG00321,HG00328,NA18933,NA20756,NA20752,HG00110,NA20804,NA19204,NA12154,HG00105,NA19257,NA19214,NA19138,HG00112,NA07357,HG00118,NA18517,NA12287,NA19189,NA10851,NA12776,NA19116,NA12890,HG00103,NA20506,HG00285,NA12842,NA19131,HG00332,HG00154,HG00177,NA11931,NA11831,NA12399,NA20792,NA20798,NA20795…	414	1	1	1
	1	10461189	AtoG	-	HG00178,NA20540,NA20769,NA11830,HG00240,NA12347,NA07048,NA12761	8	0	0	1
	1	10461197	AtoG	-	NA19102,NA19141,NA07048,NA12400,HG00236,NA18499,NA12347,NA12156,HG00243,HG00240,HG00328,HG00155,HG00261,NA19143,HG00315,HG00324,HG00276,NA20504,NA12272,NA18505,HG00246,HG00272,NA19107,NA11881,HG00309,NA19197,HG00245,NA12829,NA11894,NA12762,NA20519,NA12144,NA20808,NA19144,NA12044,HG00266,NA20799,NA20759,HG00142,NA12154,NA19214,HG00129,HG00123,NA19209,HG00268,NA20812,HG00149,NA20796,NA20588,NA10847…	308	1	1	1
	1	10461203	AtoG	-	HG00315,HG00334,HG00320,HG00145,HG00324,NA18907,NA20504,NA20811,HG00360,HG02215,NA10847,NA18520,NA20754,NA19146,HG00278,NA19147,HG00129,NA12873,HG00338,NA20797,HG00272,HG00246,HG00353,NA20809,NA12830,NA20534,HG00180,HG00339,HG00149,HG00101,NA11894,NA19137,HG00119,HG00238,HG00240,HG00384,HG00277,HG00243,NA11920,NA19152,NA07051,NA12775,NA20795,NA20798,NA20792,NA12399,HG00268,HG00332,HG00154,NA19225…	328	1	1	1
	1	10461918	AtoG	-	NA06986,NA18502,HG00313	3	1	1	1
	1	10461960	AtoG	-	HG00343,HG00142	2	1	0	1
	1	10461983	AtoG	-	NA19223,NA18502,HG00343,HG00142,NA06986	5	1	1	1
	1	10461993	AtoG	-	HG00142,HG00343,NA12813,NA18502,NA06986,NA19223,HG00158,NA12750	8	1	0	1
	1	10462258	AtoG	-	HG00323,NA20765	2	1	0	1
	1	10576918	AtoG	+	NA19095,HG00355	2	1	1	1
	1	10576919	AtoG	+	HG00355,NA19095	2	1	0	1
	1	10577004	AtoG	+	HG00355,NA19095	2	1	1	1
	1	10577016	AtoG	+	HG00355,NA19095	2	1	1	1
	1	11020653	AtoG	+	HG00355,NA19095,NA20588	3	0	0	1
	1	11020654	AtoG	+	NA19095,NA19131,NA20588,NA12750,HG00117,HG00355	6	1	1	1
	1	11020659	AtoG	+	NA20588,NA12761,NA19131,HG00117,NA19095,HG00355	6	1	0	1
	1	11020662	AtoG	+	NA20588,NA12829,HG00117,NA19131,NA19095,NA12761,HG00355	7	1	0	1
	1	11020799	AtoG	+	NA18511,NA20588,NA19198	3	0	0	1
	1	11020803	AtoG	+	NA18870,HG00339,NA12716,NA12761,HG00355,HG00373,NA18502	7	1	0	1
	1	11020816	AtoG	+	NA12234,HG00355,NA20543,NA20527,NA19210,HG00276,NA19118,NA20801,HG00331,NA19247,NA19095,HG00338,NA06986,NA19113,HG00373,NA19222,HG00375,NA20796,HG00234,NA18916,NA20532,NA12761,NA19114,NA18923,HG01334,NA19130,NA12716,NA20773,NA06994,HG00321,NA19159,NA19144,NA20588,HG00379,NA19248,HG00277,HG00339,NA12383,NA19117,NA12718,NA19213,HG00116,NA19175,NA19209,HG00149,NA18511,NA12873,HG00110,NA12813,NA19206…	105	1	0	1
	1	11020835	AtoG	+	HG00117,NA19131,NA20797,NA12813,NA20768,NA19093,HG00339,NA18498,HG00243,NA19210,NA19223,HG00373,NA19257,NA20515,HG01334,NA20588,NA20761,NA18923,NA19175,NA12286,NA12843,NA19214,NA12750,NA18868	24	1	0	1
	1	11020848	AtoG	+	NA20797,NA12761,NA20761,NA18498	4	0	0	1
	1	11020859	AtoG	+	HG00373,NA19247,NA19198,NA19214,NA19093,HG00344	6	1	1	1
	1	11020860	AtoG	+	HG00328,HG00236,NA19098,NA11994,NA19099,NA19223,NA18873,NA12889,NA18923,HG00355,NA06994,HG00117,HG00380,HG00183,NA19131,NA20509,NA19222,NA20771,HG00365,HG00373,HG00344,HG00262	22	1	1	1
	1	11020869	AtoG	+	NA18873,NA20787,NA19256,NA19223,HG00114,NA11994,HG00246,NA19213,NA18511,HG00259,HG00313,NA18934,HG00268,NA12399,NA12775,HG00277,NA20771,HG00139,NA19248,NA12873,HG00358,NA20515,NA12716,NA19175,HG00319,NA12829,NA12843,NA18907,NA19095,NA12043,NA18517,NA12275,NA20527,NA19214,NA18870,NA20756,NA19114,NA19108,NA19093,HG00315,NA18868,NA12156,NA20797,NA11992,NA19210,NA07048,NA19099,NA19107,HG00111,HG00183…	111	1	1	1
	1	11020871	AtoG	+	NA19095,NA19248,NA20765,HG00236,NA12750,NA11840,NA18502,NA19210,HG00339,HG00338,NA19129,NA12829,HG00262,NA20771,NA18498,NA20758,NA19175,NA19141,NA19098,HG00114,NA19093,NA18873,NA18916,NA11994,NA12814,HG00137,HG00365,HG00277,NA19131,NA12751,NA12889,HG00268,HG00259,NA20783,HG00358,NA19206,HG00132,NA19200,NA12154,NA19114,HG00260,NA19213,NA20768,HG00331,NA12873,NA19223,NA19256,HG00183,NA20588,NA19222…	104	1	1	1
	1	11021218	AtoG	+	NA18934,HG00117,NA12761,NA12399,HG00183,NA19213	6	1	1	1
	1	11021225	AtoG	+	NA19108,HG00375,NA11831,NA19131,HG00355,NA06986,NA19159,NA20761,NA19141,HG00321,NA12814,NA19144,NA20588,HG00137,NA20527,HG00188,NA12273,NA19118,NA19095,NA19093,HG00117,NA19206,NA19130,NA18934,NA19223,HG00313,HG00133,NA12751,NA19256,HG00259,NA12716,NA20765,NA12340,HG00239,NA19222,NA12399,HG00331,HG00183,NA19190,NA12283,HG00378,HG00266,NA19209	43	1	1	1
	1	11021238	AtoG	+	HG00239,NA19175,NA20761,NA19117,NA06986,HG00378,HG00117,NA19144	8	1	0	1
	1	11021239	AtoG	+	NA19171,NA20588,NA12751,HG00239,NA20508,NA12273,NA19118,NA12058,NA20527,NA19213,NA19159,HG00188,NA12716,HG00328,NA12761,NA19095,HG00278,NA19117,NA19206,HG00137,NA12399,NA18912,HG00313,NA11831,NA19207,NA19143,HG00183,NA12873,NA12827,NA20756,NA19130,NA19141,NA20761,NA18916,NA11994,HG00321,NA11881,HG00136,NA06986,NA19222,HG00331,NA19175,HG00375,NA19113,NA11930,NA19209,NA19108,NA12283,HG00309,HG00378…	83	1	1	1
	1	11021256	AtoG	+	NA19206,NA12814,NA19118,HG00137,HG00365,NA20765,NA19222,NA20761,NA18873,NA20512,NA19223,HG00378,NA20527,NA19213,NA11930,NA18486,HG00266,NA19130,NA19095,NA19108,HG00259,NA20756,NA11831,HG00117,HG00255,NA19214,NA18858,NA06986,NA20588,NA19093,NA18909,HG00355,NA18934,NA19175,HG00142,NA12827,NA06985,NA20509,HG00338,NA18511,HG00133,NA19129,HG00268,HG00097,NA19116,NA12750,NA19131,NA12873,NA19113,HG00331…	62	1	0	1
	1	11021265	AtoG	+	NA20761,HG00117	2	0	0	0
	1	11021268	AtoG	+	NA12751,NA18934,HG00378,NA19130,NA12716,NA19175,NA19213,NA20588,NA19146,NA12399,NA18909,NA20509,NA20765,NA19141,NA06985,HG00338,NA12750,NA06986,NA19093,HG00268,NA19131,HG00239,HG00336,HG00097,HG00274,NA19119,NA19160,NA18873,HG00355,NA11930,HG00255,HG00133,NA20512,NA19129,NA18511,HG00131,NA20527,NA20797,NA19256,NA18912,HG00138,NA19222,HG00331,HG00154,NA20761,HG00321,NA18502,HG00365,NA19210,NA19207…	74	1	1	1
	1	11021280	AtoG	+	NA11831,NA20761,NA06986,HG00117,NA20588,NA19108,NA19130,HG00321,NA11930	9	1	1	1
	1	11021321	AtoG	+	NA12413,HG00183,NA12775,NA12842,NA18934,HG00117,NA20588,NA19171,HG00365,NA11831,NA18486,NA19095,NA18511,NA20527,NA06986,NA19131,HG00375,HG00105,HG00131,NA12006,NA20761,HG00355,NA12761	23	1	1	1
	1	11021330	AtoG	+	NA20527,HG00365,NA19095,NA12873,HG00117,HG00375,NA20761,HG00355,NA20588,HG00183,NA06986,NA19131	12	1	1	1
	1	11021393	AtoG	+	HG00355,NA19095	2	1	1	1
	1	11021415	AtoG	+	HG00276,HG00237,NA20828,NA19143,NA12814,NA12761,HG00375,NA19206,HG00117,NA11994,NA18873,NA11843,NA20527,NA19095,NA18511,HG00355,NA19222	17	1	0	1
	1	11021417	AtoG	+	NA19222,NA12814,HG00117,NA20828	4	1	1	1
	1	11021457	AtoG	+	NA19130,NA19171,NA18486,NA12814,NA18511,NA20773,NA19175,NA20761,HG00378,NA19095,HG00117,NA19108,HG00362,HG00379,HG00309,NA11994,NA11832,NA12546,NA06986,NA20828,HG00187,NA20756,NA12287,HG00371,NA20800,HG00278,HG00355,NA18858,NA20797,NA19222,NA12347,HG00361,HG00102,HG00364,HG00328,HG00327,NA20582,HG00265,HG00373	39	1	1	1
	1	11021530	AtoG	+	NA06994,NA20797,HG00355,NA19159,HG00233,NA19257,NA19117,NA19223,NA07347,NA12273,NA12814,HG00328,NA19197,NA19131,HG00375,NA19107,NA18498,HG00276,HG00379,HG00146,HG00131,NA11994,NA19200,HG00138,NA18934,NA19146,NA12413,NA19189,HG00130,NA19118,HG00157,NA12399,NA07051,NA19147,HG00378,NA19213,HG00344,NA12716,NA20787,NA20761,NA20756,HG00268,HG00338,NA20509,HG00325,HG00271,NA12872,NA12750,NA19095,NA12489…	68	1	0	1
	1	11021539	AtoG	+	HG00117,NA20761,NA19213,NA20797	4	1	0	1
	1	11021540	AtoG	+	HG00130,NA12814,HG00364,NA19213,HG00378,NA20761,HG00131	7	1	0	1
	1	11021610	AtoG	+	NA20768,HG00137,HG00277,NA12154,NA19114,HG00154,NA18873,NA20797,HG00320,NA18868,NA10851,NA07037,HG00097,HG00119,HG00378,NA19152,NA19247,HG00379,HG00117,HG00373,NA19248,NA20773,NA19117,NA12058,NA19159,NA19207,HG00328,NA12546,HG00285,NA12762,NA19095,NA19147,NA12750,NA12814,NA07051,NA12777,NA20588,HG00273,HG00343,HG00187,HG00233,HG00138,NA20761,NA18870,NA12829,HG00364,NA18923,NA19093,HG00344,HG00128…	83	1	1	1
	1	11021653	AtoG	+	NA19130,NA20518,HG00344,HG00117,NA19093,NA20772,NA06986,NA19108,HG00364,NA12283,NA20803,HG00268,NA11893,HG00306,HG00309,NA12761,HG00326,NA12814,NA19146,NA12874,NA11829,NA18502,HG00331,NA19117,NA19113,HG00273,NA06994,NA07037,NA20527,HG00233,NA19095,NA12234,NA11831,HG00260,NA18511,NA11843,HG00142,NA12156,HG00276,NA19175,NA20787,NA20515,HG00130,NA12813,NA20509,HG00114,HG00343,NA19129,NA12777,HG00376…	62	1	0	1
	1	11021654	AtoG	+	HG00280,NA19175,HG00356,NA19159,HG00233,HG00328,HG00108,NA20518,HG00306,NA12286,NA19093,NA20588,NA20772,NA12272,HG00130,HG00268,NA19171,HG00371	18	1	1	1
	1	11021667	AtoG	+	NA12761,NA12750,HG00232,HG00268,NA18868,NA12154,HG00233,NA19147,NA12814,NA20787,HG00328,HG00117,NA20772,HG00178,HG00141,NA18934,NA07037,NA20761,NA19197	19	1	0	1
	1	11021718	AtoG	+	NA20761,NA20532	2	1	0	1
	1	11021734	AtoG	+	HG00116,NA11930,HG00315,NA19144,NA20761,NA12400,NA12750,HG00306,NA19095,HG00240,NA11830,NA20541,NA19171,NA12273,NA19159,HG00141,NA18912,NA18517,NA12776,NA12043,NA12546,NA19160,HG00285,HG00131,NA19248,NA20588,NA07357,NA12751,NA19172,NA20582,HG00356,NA20797,NA12814,HG00137,NA20795,HG00154,NA11931,HG00114,NA20528,NA20814,HG00336,HG00276,HG00111,HG00341,HG00233,HG00364,NA18907,NA19210,HG00099,HG00331…	235	1	1	1
	1	11021739	AtoG	+	NA19175,HG00343,HG00233	3	0	0	0
	1	11021792	AtoG	+	NA20800,HG00154,NA11832,NA18498,NA20787	5	1	0	1
	1	11021831	AtoG	+	NA19175,HG00178,NA12760,NA20532,HG00355,NA18870,NA20813,HG00233,HG00373,HG00268,NA18511,HG00105,HG00260,NA10847,NA12843,HG00331,HG00343,HG00177,HG00117,NA12777,NA11840,NA19214,NA19129,HG00375,NA20507,NA20797,NA20528,NA06994,NA18510,NA19248,NA18934,NA18909,HG00097,NA19197,NA20828,NA20588,NA19198,NA06989,NA18498,NA12815,HG00242,NA20530,NA19210,NA19143,HG00376,NA12413,HG00328,NA20761,HG00344,HG01791…	53	1	0	1
	1	11021878	AtoG	+	HG00379,NA12400,NA12830	3	0	0	1
	1	11021879	AtoG	+	NA18511,HG00268,NA18488,NA20588,NA19095,HG00115,NA12829,NA12777,NA06994,HG00133,NA20758,NA06986,NA19198,HG00233,HG00365,HG00327,HG00271,HG00343,HG00111,NA18934,HG00260,HG00142,HG00344,NA06989,NA18873,HG00171,NA18908,HG00119,NA12760,NA19159,NA12043,NA11930,NA11994,NA12383	34	1	0	1
	1	11021885	AtoG	+	NA11920,HG00364,NA11995,NA20803,HG00233,NA12830,NA19185,HG00337,HG00111,HG00324,HG00341,HG00130,NA19210,NA06985,NA11843,HG00276,NA20527,NA20787,HG00157,HG00339,HG00263,NA20771,NA12156,NA12815,HG00242,NA19256,NA20810,NA11829,NA18489,HG00259,HG00266,NA20754,NA11930,NA12874,HG00110,HG00365,NA19131,NA18499,HG00308,NA12348,NA20516,HG00373,HG00236,NA19223,NA12763,HG00282,HG00355,NA18858,HG00133,NA11830…	218	1	1	1
	1	11021891	AtoG	+	NA20772,HG00139,NA18912,NA19159,NA06989,HG00177,HG00268,NA12383,NA11832,NA07347,NA20761,NA11894,NA18873,NA20530,NA11920,NA19198,NA18489,NA20815,HG00148,HG00242,NA12873,NA12815,NA12144,HG00246,NA20771,NA12814,NA06986,NA12843,HG00263,NA19247,NA11829,HG00315,HG00344,HG00327,NA18517,NA19257,NA19175,NA12874,NA12889,NA18934,HG00137,NA19210,HG00154,NA11994,NA12058,HG00117,NA19197,NA20582,HG00105,NA20525…	148	1	1	1
	1	11021893	AtoG	+	NA18934,HG00233,HG00178,NA20787,NA12815,NA12716,NA19108,NA12843,NA19175,HG00344,HG00379,NA20527,NA12829,NA12777,HG00331,NA20761,HG00282,NA06989,NA19256	19	1	0	1
	1	11027958	AtoG	+	NA20787,NA19116	2	1	0	1
	1	11027960	AtoG	+	HG00238,HG00325,HG00146,HG00309,NA19116,HG00306,NA12058,NA12156	8	1	1	1
	1	11028012	AtoG	+	HG00309,NA12156	2	1	0	1
	1	11028036	AtoG	+	HG00306,HG00146,NA20787,NA12058	4	1	1	1
	1	11028075	AtoG	+	NA12156,HG00321	2	1	0	1
	1	11028095	AtoG	+	HG00142,HG00146,HG00309	3	1	1	1
	1	11028101	AtoG	+	HG00236,HG00142,NA12156,NA19223,NA12058,HG00306,HG00189,NA12827,NA12399,NA12716,NA12761,NA06986,HG00146,NA20772	14	1	1	1
	1	11028102	AtoG	+	HG00117,NA20530,NA12763,NA12399,HG00182,NA06986,NA20509,NA12813,HG00355,NA20765,HG00146,HG00142,HG00332,NA12827,NA19116,NA12156,NA19223,NA11892,NA12842,HG00238,HG00309,HG00119,HG00321,HG00338,HG00375,HG00306,HG00315,NA12716,HG00325,HG00259,NA11893,NA20772,NA20787,HG00189	34	1	1	1
	1	11028107	AtoG	+	NA11892,NA20530	2	1	0	1
	1	11028111	AtoG	+	HG00259,HG00375,NA20765	3	1	1	1
	1	11028142	AtoG	+	NA12058,HG00384,HG00131	3	1	0	1
	1	11028143	AtoG	+	NA07357,HG00236,HG00189,HG00325,NA20787,NA20772,NA06986,HG00321,NA20765,NA12842,NA12156,NA12058,NA19247,NA11930,HG00384,NA12399,HG00355,HG00309,HG00259,HG00117,NA20509,HG00119,HG00146,NA12827,HG00375,HG00332,HG00280	27	1	1	1
	1	11028163	AtoG	+	HG00236,NA12058,NA11892,HG00234,NA07357,HG00309,NA12761,NA20530,NA20772,HG00338,HG00355,HG00259,NA06986,NA19141,NA19116,HG00117,NA12716,HG00384,HG00119,HG00146,NA12775,NA20771,HG00332,HG00280,NA12827,NA20787,HG00369,HG00149,NA11930,NA20765	30	1	1	1
	1	11028166	AtoG	+	NA12842,NA07357,NA20532,NA20765,HG00309,HG00280,HG00369,HG00146,HG00325,HG00142,HG00332,HG00131,NA11893,HG00236,NA06986,NA12775,NA20771,HG00315,NA12716,HG00117,NA11930,HG00234,NA19247,NA12058,NA20787,HG00384,HG00355,NA19141,NA12761,NA20772,HG00338,HG00259,HG00149,NA20530	34	1	1	1
	1	11028176	AtoG	+	HG00280,HG00355,HG00234,NA11893,NA12775,HG00369,NA19223,NA12156,HG00259,NA20772,NA12716,NA12058,NA19141,NA20787	14	1	0	1
	1	11028202	AtoG	+	NA20787,HG00338,HG00306,NA19141,HG00234,NA11995,NA20509,HG00355,NA12058,HG00131,HG00117,NA06986,NA11930	13	1	0	1
	1	11028205	AtoG	+	HG00234,NA20772,HG00315,NA20530,NA07357,NA11995,NA19141,HG00119,NA12058,HG00369,HG00325,NA19223,NA20509,NA20765,HG00338,NA19247,HG00142,NA11893,HG00355,HG00309,HG00131,NA12399,NA20787,HG00332,HG00306,NA12775,HG00117,NA12716,NA06986,NA11930,NA20771,NA12763	32	1	1	1
	1	11028206	AtoG	+	HG00355,HG00315,HG00280,HG00309	4	1	0	1
	1	11028207	AtoG	+	NA20787,NA20771,NA19247,HG00355,HG00117,NA11995,HG00315,HG00338,HG00309	9	1	0	1
	1	11028853	AtoG	+	HG00355,NA20509	2	1	1	1
	1	11028920	AtoG	+	NA20509,HG00238,HG00183,NA20532,NA12058,HG00355,HG00131	7	1	1	1
	1	11029016	AtoG	+	NA12058,HG00355,HG00183,HG00325,NA20509	5	1	1	1
	1	11029346	AtoG	+	NA12156,HG00238,HG00131	3	1	1	1
	1	11029690	AtoG	+	NA19130,NA12399,NA20530,NA12874,NA20509	5	1	0	1
	1	11029698	AtoG	+	NA20765,NA20588	2	1	0	1
	1	11029716	AtoG	+	HG00277,HG00131,NA12058,NA12286,NA12156,NA11831,HG00117,NA11893,NA18511,NA19131,NA20765,HG00120,NA20806,HG00309,HG00119,NA20509,NA06986	17	1	1	1
	1	11029722	AtoG	+	NA12273,NA12286	2	1	0	1
	1	11029728	AtoG	+	HG00334,NA20530,NA12058,HG00332,NA19095,NA12286,HG00259,NA11831,NA12399,NA20806,NA12340,NA12273,NA20532,HG00355,HG00117,NA11893,NA19131,NA12874,HG00376,NA12775,NA19223,HG00233,HG00315,HG00137,HG00331,NA06986,NA20772,NA07347,NA20828	29	1	1	1
	1	11029741	AtoG	+	NA12842,NA12273,HG00259,NA12058	4	1	0	1
	1	11029742	AtoG	+	NA19197,HG00373,NA20765,NA20530,NA19095,NA12827	6	1	0	1
	1	11029756	AtoG	+	HG00338,NA06984,HG00309,NA12341,NA12058,HG00131,NA12829,HG00277,HG00332,HG00142,NA19116,NA18916,HG00259,NA11831,HG00177,NA12340,NA12286,NA19141,NA12273,NA19197,NA19130,HG00183,NA12399,NA12874,NA12775,NA12842,NA19223,HG00233,NA20765,HG00150,NA12156,HG00137,HG00120,HG00356,NA20772,HG00355,NA20530,HG00315,HG00102,HG00373,NA11930,HG00234,HG00306,HG00331,NA11830,HG00157,HG00105,HG00334,NA19095,HG00358…	70	1	1	1
	1	11029768	AtoG	+	NA12341,NA20509,HG00117,NA12286,NA11893,HG00177,HG00331,HG00325,HG00121,HG00313,HG00378,HG00105,NA19095,NA12156,NA20588,NA12775,HG00233,HG00182,HG00234,NA12763,NA11930,HG00309,NA19141,HG00306,HG00142,NA20806,NA20828,NA06984,NA19223,NA18923,HG00157,NA19116,NA12761,NA11830,HG00259,HG00137,NA20765,NA18916,NA12058,NA20787,NA19197,NA11831,NA12829,NA12750,HG00332,HG00355,NA19131,HG00131,NA12874,NA20530…	59	1	1	1
	1	11029778	AtoG	+	HG00120,HG00131,HG00355,HG00259,NA20787,HG00375,NA20806,NA12775,HG00137,HG00183,HG00150,NA12763,NA11830,HG00142,NA12273,NA18923,NA12058,NA20772,NA12341,HG00306,NA20530,NA20532,NA20828,NA12813,NA07347,NA12827,NA12829,NA11831,HG00376,NA06986,HG00325,NA20771,HG00233,NA18916,NA12156,NA12761,HG00309,NA12399,NA12340,NA11930,NA06984,HG00378,HG00313,NA12874,HG00105,NA19223,HG00315,HG00334,NA19141,HG00117…	59	1	1	1
	1	11029796	AtoG	+	HG00105,HG00177	2	1	0	1
	1	11029812	AtoG	+	NA12340,NA11830,NA12763,HG00356,HG00355,NA07347,NA20806,HG00259,NA19095,NA12058,NA20509,HG00375,HG00234,HG00117,NA20530,NA20772,NA18916,NA12399,HG00183,NA11930,NA19116,NA12827,NA06986,NA20828,NA18923,NA20765,HG00137,HG00105,NA12775,HG00150,NA18511,NA20532,NA06984,HG00325,NA20771,HG00332,HG00233,NA12874,NA12829,NA11831,NA12842,NA19141,HG00120,HG00331,HG00334,NA11893,HG00358	47	1	1	1
	1	11029821	AtoG	+	HG00119,HG00309,NA19141,NA20530,NA06986,NA20509,NA20771,HG00355,NA11930,NA12763,NA12874,NA12058,NA12842,HG00277,NA11893,HG00177,NA12286,NA19197,NA19223,HG00142,HG00331,HG00183,NA12156,HG00259,NA20828,HG00137,HG00105,NA19095,HG00131,HG00306,NA18916,NA12340,HG00332,HG00375,NA12761,NA20772,NA12273	37	1	1	1
	1	11029825	AtoG	+	NA12340,NA19141	2	0	0	0
	1	11029885	AtoG	+	NA20532,NA07347,NA12874,NA19223,NA12156	5	1	0	1
	1	11071376	AtoG	-	NA19095,HG00376	2	0	0	0
	1	11078025	AtoG	-	NA20765,NA19095,NA19159,HG00355,NA06986	5	1	1	1
	1	11078028	AtoG	-	NA19095,NA20765,HG00355	3	1	1	1
	1	11078038	AtoG	-	NA06986,NA20765,HG00355,NA19095,NA19159,NA20588	6	1	0	1
	1	11078081	AtoG	-	NA19095,HG00355,NA06986	3	1	1	1
	1	11078106	AtoG	-	NA19095,NA20588	2	1	0	1
	1	11078127	AtoG	-	NA06986,HG00355,NA19095,NA20588	4	1	1	1
	1	11078163	AtoG	-	NA12763,NA20588,HG00355	3	1	1	1
	1	11078180	AtoG	-	NA19159,NA20588,NA12763,NA06986	4	1	1	1
	1	11083089	AtoG	-	HG00355,HG00117	2	1	1	1
	1	11106656	AtoG	-	NA19141,HG00155	2	0	0	0
	1	11286279	AtoG	+	NA20518,HG00242	2	0	0	0
	1	11287808	AtoG	+	HG00137,HG00334,HG00259,NA20513,NA06985,HG01791,NA18912,HG00325,NA20503,NA19113,NA18916,NA19116,NA19159,NA18486,HG00115,HG00240,NA20538,NA20765,NA12275,HG00319	20	1	1	1
	1	11295922	AtoG	+	NA19095,HG00378,HG00355	3	1	0	1
	1	11295934	AtoG	+	NA19095,HG00378,HG00355	3	1	1	1
	1	11820997	AtoG	+	NA20527,NA19095,HG00355,HG00117,HG00375,NA19153,NA06986	7	1	1	1
	1	11836084	AtoG	+	NA11840,NA20502	2	0	0	0
	1	11840781	AtoG	+	HG00244,NA12761,HG00182,HG00261,HG00330,HG00127,HG00233,HG00110,NA20502,NA12763	10	0	0	0
	1	11920392	AtoG	-	NA19213,NA12006,NA20543,NA12763,NA20518,HG00233	6	0	0	0
	1	11922487	AtoG	-	NA12283,HG00261,HG00338,HG00182	4	0	0	0
	1	12012665	AtoG	+	HG00242,NA20543,HG00158,HG00263	4	0	0	0
	1	12022869	AtoG	+	NA07000,NA20804	2	0	0	0
	1	12064202	AtoG	+	NA20538,NA20524,NA19131,NA07051,NA19213	5	0	0	0
	1	12126001	AtoG	+	HG00264,NA19131	2	0	0	0
	1	12201071	AtoG	+	HG00117,NA19223	2	1	1	1
	1	12207208	AtoG	+	HG00244,NA12006,HG00269,NA20507,HG00242,NA11918,HG00148,NA11830,NA12830,NA12287,HG00127	11	0	0	0
	1	12208514	AtoG	+	HG00148,HG00269,NA12830	3	0	0	0
	1	12568159	AtoG	-	NA20507,HG00269,NA11830,HG00282,HG00273,HG00373,NA07051,NA20538	8	0	0	0
	1	13779361	AtoG	+	NA20787,HG00282,HG00373	3	0	0	0
	1	13782493	AtoG	+	HG00373,HG00282	2	0	0	0
	1	13782619	AtoG	+	HG00148,HG00155,HG00242,HG00234,HG00373,NA20527,HG00269,NA12762,NA12890,HG00121,HG00238	11	0	0	0
	1	15491610	AtoG	-	NA20527,NA12058	2	1	0	1
	1	15569774	AtoG	+	NA20538,HG00234	2	1	0	1
	1	15569814	AtoG	+	NA19247,NA20538	2	1	1	1
	1	15570489	AtoG	+	NA20524,NA12058,NA19213,HG00146,HG00360,HG00331,NA20538	7	0	0	0
	1	15572632	AtoG	-	NA18909,NA11840,NA12813	3	1	1	1
	1	15572633	AtoG	-	NA12775,NA11840,NA12813,NA18909	4	1	0	1
	1	15572651	AtoG	-	NA11840,NA18909,NA12813	3	1	0	1
	1	15572759	AtoG	-	NA11832,NA20586,NA19213,NA11840,HG00338,NA11931	6	0	0	0
	1	15572849	AtoG	-	HG00338,NA11831,HG00108,NA18502,HG00343,NA19257,NA19118,NA12399,NA19093,NA11994,NA11840,HG00133,NA19206,NA12874,NA12763,NA12348,NA11832,HG00309,NA18916,NA12775,HG00321,NA06994,NA19223,NA20586,NA19131,NA20801,NA07051,NA11931,NA19207,HG00344,NA19095,NA20518,NA19107,NA19159,NA12144	35	1	0	1
	1	15572850	AtoG	-	NA19093,NA19159,HG00344,HG00343,NA19107,NA20801,NA06994,HG00108,NA19257,HG00133,NA19095,NA11832,NA12775,NA12874,NA19213,NA19207,NA11840,HG00338,NA19223,NA19131,HG00321,NA19118,NA19206,NA11831,NA07051,NA12348	26	1	0	1
	1	15572853	AtoG	-	NA11831,NA19197,NA18502,NA20518	4	1	0	1
	1	15572880	AtoG	-	HG00343,NA11881,NA12842,NA19197,HG00272,NA19159,NA19225,NA11831,HG00365,NA19256,NA19129,NA06994,HG00321,HG00330,NA19107,HG00309,HG00181,HG01334,NA19118,NA20524,NA11830,NA20801,NA20519,NA19213,NA11994,NA11840,HG00137,NA12760,NA12813,HG00384,NA19095,NA19200,HG00133	33	1	0	1
	1	15572885	AtoG	-	NA19256,NA12760,HG00384,NA19095,NA20524,NA20519,NA11840,NA20785,NA12144,HG00111	10	1	0	1
	1	15572887	AtoG	-	HG00269,NA19107	2	1	0	1
	1	15572892	AtoG	-	HG00269,HG00108,HG00331,NA18502,NA19257,HG00262,NA11832,HG00272,NA20518,NA19107,HG00330,HG00338,NA20524,NA19129,HG00133,NA11881,NA19207,NA20530,HG00234,HG00365,NA20785,NA19223,NA19159,NA12399,NA19093,NA18916,HG00137,NA11831,NA19206,NA12775,NA19200,HG00321,NA19131,NA11830,NA20801,NA11931,NA20586,NA19213,NA19197,NA07051,NA12760,NA06994,HG00384,NA11994,NA20519,HG00343,NA12043,NA19095,HG00111,NA19118…	64	1	1	1
	1	15572896	AtoG	-	NA18916,HG00133,HG01334,NA12399,HG00365,NA11830,NA11831,HG00181,HG00338,HG00330,HG00344,NA19223,NA20518,NA19213,NA12043	15	1	0	1
	1	15572918	AtoG	-	NA19131,NA20518,HG00272,NA20785,NA12399,NA11830,HG00137,NA11931,NA19213,NA11881,HG00331,NA19225,NA19129,NA12842	14	0	0	1
	1	15573001	AtoG	-	NA19095,NA18934,NA18916	3	1	0	1
	1	15573013	AtoG	-	NA18934,NA19095,NA18916	3	1	0	1
	1	15573014	AtoG	-	NA18916,NA19095	2	1	0	1
	1	15573135	AtoG	-	HG00338,NA19223,NA12155,NA20527,NA20803,NA19093,NA06986,NA18511,NA18916,HG00108,NA19222,NA20512,NA19131,HG00277,NA19118,NA19092,NA19108,NA11994,NA11893,HG00343,NA19143,NA12718,NA20786,NA20765,NA11831,NA20756,NA06994,NA18934,NA19210,NA19095,NA20519,HG00365,NA12813,HG00284,HG00355,HG00117,NA18908,HG01334,NA19214,NA20801,NA12716,NA19152,HG00139,NA18508,NA11832,NA12814	46	1	1	1
	1	15573137	AtoG	-	NA19118,HG00365,NA12718,NA18934,NA19143,HG00355,NA12813,NA20527,NA19095,NA18908,NA12814,NA20519,NA19159,NA18916,NA06994,HG00383,HG00117,NA19257,NA11831,HG00284,NA06986,NA12716,NA19222,NA19116,NA19093,NA19131,NA20803,NA19108,HG00277,NA20786,NA12155,NA18499,HG00108,NA12234,NA19210,NA19207,HG00111,HG00338,NA20801	39	1	0	1
	1	15573147	AtoG	-	HG00284,NA07051,HG00331,NA18916,NA19257,NA18498,NA19131,NA12814,NA11893,NA19143,NA19159,NA18502,NA20803,NA20527	14	1	0	1
	1	15573159	AtoG	-	NA19213,NA18508,HG00159,NA20514,NA20803,HG00365	6	0	0	1
	1	15573177	AtoG	-	HG00284,HG00365,NA18508,HG00353	4	1	0	1
	1	15573182	AtoG	-	HG00236,NA07051,HG00255,NA20812,NA18916,NA20516,NA20518	7	0	0	1
	1	15573196	AtoG	-	HG00133,NA20527,NA19129,NA12006,NA12829,HG00139,NA11995,HG00244,HG00130,NA18502,NA18934,NA18508,HG00338,NA12399,NA12144,NA12155,NA07051,HG00159,NA20514,HG00336,NA12234,NA19210,HG00255,NA20801,HG00234,NA20774,NA12043,HG00375,NA19107,NA19099,NA19207,NA07347,HG00149,NA20530,NA19197,NA19213,NA20803,HG00277,NA18909,NA06994,NA20519,NA19209,NA19093,NA11893,NA19143,NA12763,NA19247,HG00332,NA19190,HG00108…	92	1	1	1
	1	15573197	AtoG	-	HG00332,NA20589,NA19257,NA18508,NA18934,NA20507,HG00139,HG00150,HG00244,HG00149,NA19190,NA19095,NA12760,NA11840,NA12874,NA11994,NA11893,HG00325,NA20538,NA20519,NA12813,HG00378,HG00117,NA19198,NA20518,NA18907,NA20508,NA19210,HG00119,HG00238,NA19114,NA11832,NA18486,HG00255,HG00143,NA19200,HG00365,NA19143,NA20801,HG00313,NA11831,NA19099,NA19146,NA20786,NA18916	45	1	0	1
	1	15573212	AtoG	-	NA20532,NA20765,NA19095,HG00114,NA11831,HG00159,NA19159,NA19207	8	0	0	1
	1	15573215	AtoG	-	NA18870,NA20524,HG00332,NA11881,NA06986,NA19190,NA20765,NA12155,HG00326,HG00238,NA20527,NA20507,HG00338,NA12413,NA20514,NA19146,NA19210,NA19099,NA19114,NA19095,HG00117,NA20519,NA11994,HG00355,NA20517,NA19198,HG00336,NA19130,NA18934,HG00130,NA18486,NA20532,HG00244,HG00367,NA07051,NA06994,NA18908,NA19108,NA18511,NA12043,HG00255,NA19102,NA20508,NA20774,HG00187,NA20505,NA20772,NA12829,HG00262,NA20795…	74	1	0	1
	1	15573220	AtoG	-	NA20541,NA20786,HG00336,NA19213,NA19209,HG00262,NA19248,NA19129,NA07051,HG00244,HG00330,NA06985,HG00139,NA11995,NA19172,NA19222,NA20527,NA20507,NA12413,NA19146,NA18502,NA20519,NA11994,HG00126,HG00231,NA19102,HG00313,NA20803,NA11830,HG00263,NA19197,HG00159,HG00133,HG00285,NA12234,HG00375,NA19143,NA18908,NA19223,NA19099,NA12043,NA12006,NA19114,HG00338,NA18486,NA19107,NA20756,NA12399,NA11840,HG00187…	160	1	1	1
	1	15573221	AtoG	-	NA19114,NA18934,HG00149,NA19131,NA19159,NA11840	6	0	0	1
	1	15573237	AtoG	-	NA07051,HG00139,HG00244,NA20527,NA18508,HG00159	6	1	0	1
	1	15573252	AtoG	-	NA20797,HG00159,NA18858,NA12043,NA19119,NA19257,NA11931,NA11829,NA19197,HG00326,NA19143,NA19116,NA06986,NA19248,HG00336,NA18508,NA19129,NA18498,NA12762,NA20581,HG00114,NA18934,NA19247,NA12399,NA18909,HG00239,NA12154,NA07347,NA18517,NA06984,HG00109,NA20515,NA19207,NA19131,NA18908,HG00185,NA12004,NA19206,NA19107,NA18502,NA20519,NA19200,NA11994,NA19102,NA12234,NA19121,NA20765,HG00349,NA19201,NA12155…	70	1	1	1
	1	15573256	AtoG	-	NA19118,NA12874,NA18934,NA18909,HG00111,NA11832,NA11831,NA19213,NA19210,NA20527,NA12144,HG00114,NA19131,NA12004,NA19209,HG00349	16	1	1	1
	1	15573591	AtoG	-	NA11920,NA19213,HG00242,NA06994,NA19235,NA11894,HG00239,NA18870,NA07051,NA20802,NA19257,NA20783,NA11995,NA19113,NA20585,NA19117,HG00178,HG00321,NA20796,NA19096,NA20504,NA20819,NA20535,NA12889,NA19236,HG00310,HG01791,HG00325,NA19225,HG00342,NA18508,NA20826,NA20544,NA19223,HG00129,HG00259,NA12750,HG00128,HG00365,NA20503,HG00313,HG00109,NA19152,NA20771,NA20525,NA20807,NA20797	47	1	1	1
	1	15573609	AtoG	-	HG00155,HG00262,HG00146	3	0	0	0
	1	15662383	AtoG	+	HG00131,NA12006,HG00326,HG00360,NA19131,NA07037,NA12760,NA20765,NA19213	9	0	0	0
	1	15664057	AtoG	+	HG00131,HG00097,NA20765,HG00327,NA07037,NA12760,HG00326,NA12006	8	0	0	0
	1	15666843	AtoG	+	HG00269,HG00327,NA20765,NA11994,HG00127,NA12006,HG00282,HG00231,HG00111,NA06985,HG00131,NA20532	12	0	0	0
	1	15729889	AtoG	-	HG00155,HG00236,NA12761	3	0	0	0
	1	15807585	AtoG	-	NA20543,HG00282,NA12775	3	0	0	0
	1	15933897	AtoG	+	HG00278,NA19130,NA20520	3	0	0	0
	1	16198374	AtoG	-	NA12282,NA20527,NA12399	3	0	0	0
	1	16247821	AtoG	-	HG00121,NA20524,HG00129,NA20527,NA12282,NA19130,HG00110,HG00246,NA20517	9	0	0	0
	1	16396773	AtoG	-	NA20530,HG00258,NA19107,NA11918	4	0	0	0
	1	16620040	AtoG	-	NA12760,NA20527	2	0	0	0
	1	16621342	AtoG	-	NA12812,HG00236,HG00234,NA11831,HG00260,NA12156	6	0	1	0
	1	16622452	AtoG	-	NA19159,NA20765	2	0	0	1
	1	16622504	AtoG	-	NA20807,NA19214,NA19130,NA12272,NA18486,NA12156,NA19143,NA20527,NA12815,NA18916	10	1	0	1
	1	16622533	AtoG	-	NA18499,NA18916,NA19107,NA12815,NA19130,NA20527	6	1	0	1
	1	16622539	AtoG	-	NA20765,NA06986,NA19159,NA18486,NA18499,NA11831,NA20527,NA18916,NA12156,HG00236,NA20807,NA19146,NA19130,NA19095,NA12815,NA19209	16	1	0	1
	1	16622574	AtoG	-	NA19159,NA19107,NA19214,NA11831,NA19146,NA06986,NA19209,NA19095,NA18499,NA20807,NA12815	11	1	1	1
	1	16622580	AtoG	-	NA18486,NA06986,NA19209,NA11831,HG00260,NA20527,NA19095,NA19214,NA18499,NA19130,NA19159,NA20765,HG00121,NA19143,HG00236,NA19146,NA12156,NA20807,NA19107,NA12815	20	1	1	1
	1	16622587	AtoG	-	NA19209,NA19143	2	0	0	0
	1	16622596	AtoG	-	NA20527,NA12156,NA20765,NA11831,NA18916,NA19214,NA19159,NA20807	8	1	0	1
	1	16622683	AtoG	-	NA19095,NA20527,NA19214,NA20807,NA19159	5	1	1	1
	1	16622869	AtoG	-	NA20527,NA19095	2	1	1	1
	1	16622978	AtoG	-	NA19143,NA20527,HG00236,NA19095	4	1	1	1
	1	16623287	AtoG	-	NA19143,NA12775,HG00236,NA19095,NA19130	5	0	0	0
	1	16623422	AtoG	-	HG00263,NA12814,NA12045,NA20527	4	0	0	0
	1	16624385	AtoG	-	NA19095,NA12814,NA12156,NA20527,HG00365,HG00263,NA19130,NA19143	8	0	1	0
	1	16624693	AtoG	-	HG00236,NA12045	2	1	0	1
	1	16624724	AtoG	-	NA19143,NA20527,HG00117	3	1	0	1
	1	16625562	AtoG	-	NA20527,HG00365,HG00263,HG00236,HG00324	5	1	0	1
	1	16625572	AtoG	-	NA19143,NA20527	2	1	0	1
	1	16625765	AtoG	-	NA12814,NA20527,HG00365	3	0	1	0
	1	16625772	AtoG	-	NA20527,HG00365,NA12814,HG00324,NA19143	5	0	0	0
	1	16936757	AtoG	+	NA18486,NA19095,NA19223,NA19256	4	0	0	0
	1	16969269	AtoG	+	HG00266,NA19225	2	0	0	0
	1	17021438	AtoG	-	HG00355,NA19095	2	1	1	1
	1	17068786	AtoG	-	NA11894,NA12272,NA12058	3	0	0	0
	1	18871647	AtoG	-	NA06986,HG00260,NA20544,NA12058,HG00341,HG00186,HG00108,NA12761,NA20787,NA19185,NA20774,HG00236,NA11894	13	0	0	0
	1	18876423	AtoG	-	HG00182,HG00237,HG00373,NA19225	4	0	0	0
	1	18876432	AtoG	-	HG00237,NA19225	2	0	0	0
	1	18912035	AtoG	-	HG00262,HG00275	2	0	0	0
	1	19173066	AtoG	-	HG00237,NA19130,NA20530	3	0	0	0
	1	19215745	AtoG	-	HG00282,NA19093,NA20804,NA12716,HG00102,NA20801,HG00101,NA19175,HG00378,HG00266,HG00260,NA20507,HG00138,NA12272,NA12827,NA18933,NA20754,HG00268,NA06986,NA12776,NA19159,NA20505,HG00346,NA11994,NA19118,HG00328,NA12004,NA12058,HG00133,NA19197,NA07037,HG00251,NA20513,NA12154,NA18858,NA20798,NA19096,NA18868,NA20509,NA12347,NA19185,NA12889,HG00274,NA12156,NA20539,NA06989,HG00099,NA18934,HG00151,NA20756…	152	1	0	1
	1	19215755	AtoG	-	NA19159,NA20790,NA20772,NA18923,HG00271,NA19152,HG00105,NA11994,HG00159,NA20530,NA07051,NA10851,HG01791,HG00343,NA12872,NA19257,NA12272,HG00133,HG00337,NA12829,HG00266,NA12286,NA20752,NA12889,HG00110,NA12716,NA20808,NA19107,NA06989,HG00341,NA20785	31	1	0	1
	1	19215756	AtoG	-	HG00355,NA12776,NA20785,NA12058,NA20508,HG00151,NA12156,NA20513,HG00338,NA12154,NA11992,NA18486,HG00361,HG00256,NA20752,NA11894,HG00186,NA19209,HG00183,NA19189,HG00337,NA20796,NA19247,NA19236,HG00231,HG00308,HG00131,NA20512,NA20527,NA19099,HG00375,NA19146,NA19107,HG00128,NA12283,NA12347,NA11831,HG00274,NA18517,NA11931,HG00356,NA07347,HG00159,NA20758,NA20505,NA07037,HG00251,HG00366,NA12272,NA07056…	181	1	1	1
	1	19215759	AtoG	-	HG00338,NA12347	2	1	0	1
	1	19215767	AtoG	-	NA11892,NA19171,HG00361,NA19130,NA11894,HG00236,NA20524,NA20505,NA18912,NA20828,NA19160,NA18908,NA12043,NA19206,NA19189,NA11992,NA18870,HG00259,NA20785,NA20532,NA11831,HG00138,NA18486,NA20509,NA20796,NA20772,NA20754,NA12275,HG00373,NA12716,NA19257,NA12776,NA19131,NA12286,HG00349,HG00101,NA19236,HG00282	38	1	0	1
	1	19215775	AtoG	-	NA20811,NA19235,HG00142,HG00320,HG00127,NA12842,NA11829,HG00355,NA18502,NA11930,NA19131,HG00309,NA07037,HG00343,NA20796,NA20509,NA07056,NA12272,NA20808,HG00344,NA12889,NA12283,NA12872,HG00251,HG00099,NA11881,NA19092,NA12776,NA20790,NA19144,NA19175,HG00271,NA12890,HG00242,NA11893,NA20812,NA19257,NA12156,NA18910,HG00366,NA12716,NA11995,HG00138,NA18870,HG00334,NA20809,HG00236,NA20534,HG00111,NA18908…	124	1	0	1
	1	19215779	AtoG	-	HG00326,NA12282,NA20809,NA12383,NA20752,NA12751	6	1	0	1
	1	19215807	AtoG	-	NA12156,NA19172,NA19200,NA12400,NA18923,HG00139,NA19222,NA11831,NA20541,NA19223,NA18870,HG00188,NA19092,NA19117,NA18486,NA12842,NA12827,NA12776,NA11893,NA11881,HG00361,NA18508,NA19118,NA11992,HG00328,NA20505,HG00234,HG00378,NA20826,HG00171,HG00257,HG00263,NA12282,HG00360,NA19146,NA19099,NA12249,NA12413,NA18502,HG00379,NA19144,NA18910,HG00179,HG00345,HG00173,NA12006,NA20799,NA11894,NA12283,NA12275…	120	1	0	1
	1	19215811	AtoG	-	NA12889,HG00281,NA20524,HG00157,HG00180,HG00121,HG00102,NA18923,HG00154,NA19185,HG00256,NA12058,NA18909,NA11931,NA12400,HG00315,NA19206,NA12716,HG00111,NA12399,NA19130,HG00130,HG00126,HG00177,HG00257,NA12156,HG00139,NA20804,NA18870,NA20513,NA18511,NA19175,HG00237,NA20826,NA07347,HG00266,HG00109,NA12283,NA20529,NA20812,HG00143,NA11894,NA19159,HG00150,NA20772,HG00346,NA20505,NA20521,NA12827,NA20785…	81	1	0	1
	1	19215816	AtoG	-	HG00365,HG00127,NA19172,HG00375,NA10847,NA12275,NA19144,NA20527,HG00335,HG00131,HG00308,NA12400,NA20812,HG00345,NA19198,HG00341,NA12889,HG00111,NA12286,HG00364,HG00239,HG00182,HG00373,NA12813,NA12775,NA20538,NA20530,NA20509,NA18511,HG00271,HG00319,NA19235,HG00097,HG00257,HG00173,HG00109,HG00356,NA18508,NA18908,NA20508,NA11992,NA20758,NA19118,HG00268,NA20802,HG00355,NA12413,NA20754,NA20581,NA19206…	261	1	0	1
	1	19215817	AtoG	-	HG00309,NA19257,HG00271,NA11931,NA12762,HG00237,NA06994,NA18511,HG00177,HG00315,NA20772,HG00373,HG00280,NA19107,HG00182,NA07037,HG00110,NA12751,NA12044,HG00355,NA07048,NA20516,HG00188,NA19152,NA19118,NA12400,NA19206,HG00344,NA18858,HG00133,NA12156,HG00282,NA19184,HG00108,NA20757,NA19096,NA12889,NA19093,NA11881,NA12399,NA12874,HG00143,NA18508,HG00105,HG00240,HG00157,NA18912,NA18934,NA19172,HG00128…	99	1	0	1
	1	19215839	AtoG	-	HG00268,NA20758,NA11992,NA10847,NA20508,HG00186,NA12275,HG00349,HG00308,NA12874,HG00102,NA12400,NA20796,HG00345,NA19184,HG00133,NA12546,HG00157,HG00324,NA20754,NA12341,NA20772,NA18923,NA12287,NA12156,NA20828,NA18868,NA19225,NA11894,NA12827,NA19175,HG00111,NA12043,NA20756,NA12249,NA11843,HG00138,NA19099,NA06986,NA11994,HG00100,HG00262,NA19093,NA19096,NA12154,NA12889,NA19206,HG00097,NA18909,NA06989…	58	1	1	1
	1	19215843	AtoG	-	NA12156,NA11992,NA11930,NA12718,NA12763,NA18909,NA12272,NA12889,NA19223,NA07056,NA12282,HG00365,HG00179,NA12413,HG00142,NA19099,NA20798,HG00234,NA12249,NA20828,HG00274,NA11920,NA10851,NA19096,HG00242,NA20796,HG00315,HG00280,NA20757,NA20543,HG00114,NA20530,NA11894,HG00138,NA18923,NA12154,NA12874,NA20801,NA12234,NA19256,HG00309,NA19206,NA20505,NA12399,HG00355,NA11893	46	1	1	1
	1	19215847	AtoG	-	HG00151,NA12761	2	1	0	1
	1	19215848	AtoG	-	NA12761,NA20507,NA06985,HG00251,HG00159,NA12814,HG00186,NA12004,NA12813,NA12546,NA11992,NA20516,HG00110,NA20525,NA19206,NA20773,NA12144,NA20541,NA19159,NA12341,NA07051,HG00183,NA20543,NA19223,HG00379	25	1	0	1
	1	19215849	AtoG	-	NA18508,HG00349,NA12546,HG00272,HG00133,NA20509,HG00179,HG00183,HG00282,NA19130,NA19210,NA12761,NA07347,NA12286,HG00119,NA18486,HG00182,HG00159,NA20757,NA20527,NA12234,HG00251,NA19222,HG00234,NA11893,HG00240,NA20525,NA12829,NA20541,NA20502,NA19118,HG00256,NA12272,NA19200,NA11829,NA18912,NA19257,NA12413,HG00130,HG00263	40	1	0	1
	1	19215850	AtoG	-	NA19159,NA20541,HG00105,NA12872,NA11829,HG00131,NA07051,NA20509,NA12286,NA20773,HG00127,NA20757,NA20826,HG00110,HG00282,HG00111,NA20756,HG00142,HG00102,NA18486,NA12889,NA12156,HG00338,NA11994,HG00349,NA20502,NA20796,NA20828,HG00272,NA18858,HG00186,NA19198,NA06986,NA20812,NA19223,HG00355,HG00251,NA20515,HG01791,NA18517,NA20532,NA20539,NA20527,HG00384,NA19189,NA18908,NA19185	47	1	1	1
	1	19215851	AtoG	-	NA20530,HG00379,HG00159,HG00108,HG00315,NA19152	6	1	0	1
	1	19215852	AtoG	-	NA20806,NA20785	2	1	1	1
	1	19215853	AtoG	-	HG00326,NA12874	2	1	1	1
	1	19215856	AtoG	-	HG00100,NA12286,HG00274,HG00341	4	1	0	1
	1	19215860	AtoG	-	NA12812,NA12872,HG00179,HG00361	4	1	0	1
	1	19215870	AtoG	-	HG00121,NA11994,NA12872,NA20806	4	1	1	1
	1	19215875	AtoG	-	NA11830,HG00251,NA12234,NA20773,NA12156,NA12761,NA11994,HG00378,HG00274,NA20757,HG00281,NA20785,NA18486	13	1	0	1
	1	19215905	AtoG	-	NA19118,NA19206,NA20796	3	1	0	1
	1	19215907	AtoG	-	HG00126,HG00326,NA19198,HG00231,NA10847,HG00379,NA20512,HG00179,NA20515,HG00375,NA12249,NA12282,NA12413,NA19099,NA06986,NA12814,NA12889,NA11918,NA19256,NA12761,NA19257,NA11829,NA12399,HG00127,HG00246,NA19206,HG00319,NA20785,NA20826,NA20795,HG00187,NA11994,NA11893,NA19223,NA12400,NA19247,NA18923,HG00262,NA12760,NA12383,NA19184,NA07347,NA20758,NA18908,NA11894,NA06985,NA20799,NA12874,HG00356,HG00109…	146	1	1	1
	1	19215908	AtoG	-	NA11994,NA19185,NA20826,HG00139,NA19189,HG00138,NA20586,HG00133,HG00324,HG00259,HG00281,HG00282,NA20505,NA12282,NA18910,HG00126,HG00328,HG00271,HG00360,NA20804,NA20512,HG00356,NA12286,HG00375,NA12775,NA20521,NA06985	27	1	1	1
	1	19215913	AtoG	-	HG00138,NA20773,HG01791	3	1	0	1
	1	19215916	AtoG	-	NA12399,NA19184,HG00309,NA20513,NA20509,HG00105,NA19096,HG00276,NA18511,NA19257,NA20807,NA19189,NA20543,NA12778,NA20538,NA12751,HG00246,NA12775,HG00328,NA20507,HG00180,NA06985,NA20826,NA20505,HG00239,NA18912,NA19131,HG00154,NA19185,NA20530,HG00360,HG00355,NA19206,NA18923,NA20806,HG00111,HG00125,HG00319,NA12043,NA12761,NA20801,NA19256,NA18908,NA12383,HG00271,NA20532,HG00364,HG00365,NA11892,HG00267…	90	1	0	1
	1	19215921	AtoG	-	HG00131,NA19189,NA20802,NA12413,NA12814,NA19092,NA20752,NA20505,NA19225,HG00180,HG00130,NA12872,NA19131,NA12006,NA11830,NA12776,NA12383,HG00138,NA12842,NA11829,NA19256,NA20543,HG00097,HG00263,HG00365,HG00344,NA12399,NA12400,NA19184,HG00127,HG00274,NA12763,HG00262,HG00119,HG00108,NA19144,HG00139,NA19093,HG00251,NA18912,NA12775,NA20828,NA12004,NA12815,NA10851,NA12286,NA06986,NA20531,HG00179,HG00174…	88	1	1	1
	1	19215931	AtoG	-	NA20795,HG00271,HG00108,HG00138,NA12778,NA12751,HG00097,NA19119,NA06994,NA12716,HG00328,NA07056,NA18912,HG00121,HG00355,NA19235,HG00111,NA12814,NA20529,NA07037,HG00099,NA20804,HG00282,NA19093,NA19197,NA19131,NA20512	27	1	0	1
	1	19215939	AtoG	-	NA12400,NA20509,HG00187,NA12058,NA12144,NA12775,HG00105,NA20807,NA11831,HG00251,NA18858,HG00139,HG00384,NA20510,NA20801,HG00174,NA12814,NA12347,NA20518,NA12718,HG00378,NA20515,NA20773,NA20812,NA20808,HG00154,HG00344,NA12399,NA20531,NA12829,HG00262,HG00338,NA12761,HG00309,NA20544,HG00315,NA20543,NA10851,NA20525,NA12716,HG00110,NA11931,NA20785,NA11992,NA20512,NA19223,NA12815,NA19144,NA12842,NA11994…	63	1	1	1
	1	19215940	AtoG	-	NA19189,NA12383,HG00097,NA10847,HG00262,NA11992,HG00109,HG00309,NA11831	9	1	0	1
	1	19215956	AtoG	-	HG00183,NA18489,NA12718,HG00108,NA20809,NA20512,NA07051,HG00350,NA19185,HG00109,NA12234,NA19257,NA12763,HG00315,NA12399	15	1	0	1
	1	19215961	AtoG	-	NA11992,NA12889,NA19096,NA12763,NA18489,HG00267,HG00109,NA12399,NA20773,HG00142,NA12546,NA12413,NA20801,NA11843,NA19222,HG00111,NA18909,NA20518,HG00309,NA12760,NA18486,NA19257,NA12058,NA12347,HG00256,NA20758,NA20826,NA12286,NA20510,HG00154,HG00264,NA06986,HG00102,NA20797,NA19144,NA18502,NA12043,NA20527,HG00105,NA20796,HG00320,NA06989,NA11930,NA20530,NA18511,HG00378	46	1	1	1
	1	19215962	AtoG	-	HG00272,HG00355,NA18486,HG00239,NA19099,NA20518,NA12889,NA12760,NA19247,HG00231,NA12004,HG00142,NA18934,HG00319,NA20785,NA19222,NA20512,HG00311,HG00266,NA10847,NA19225,NA19257,NA19190,HG00349,NA11995,NA20539,NA20798,NA19130,NA07051,HG00320,HG00105,NA12546,NA11930,NA20519,NA18511,NA11992,HG00274,NA19159,HG00259,HG00378,NA20529,NA18858,NA18923,NA07048,HG00159,NA19131,NA11931,NA20515,HG00114,HG00260…	102	1	1	1
	1	19215964	AtoG	-	NA19114,HG00110,NA19225,NA12043,NA11931,NA12383,NA11894,NA12718,NA12716,NA12761,NA07051,HG00188,NA20527,NA20806,NA20544,NA12286,HG00130,NA12872,HG00274,NA20758,HG00114,HG00384,HG00108,NA19130,NA12234,HG00119,NA20801,NA20510,HG00350,NA19096,NA20796,HG00133,NA18923,NA10851,NA20507,NA20539,NA12751,NA12413,NA19256,NA11892,HG00355,NA06994,HG00234,NA20516,NA19099,NA10847,NA11992,HG00356,HG00256,NA07037…	174	0	1	1
	1	19215969	AtoG	-	NA20543,NA20808,NA20586,HG00349,NA20797,NA11892,HG00356,NA12763,NA20756,NA20515,NA12829,NA20804,HG00110,NA20527,NA12282,HG00360,HG00327,NA12716,NA06994,NA11931,NA18489,NA12889,HG00268,NA20828,HG00319,NA12144,HG00188,HG00234,NA11995,NA19257,HG00309,HG00262,NA19144,NA11930,NA19099,NA19247,NA20795,NA20525,HG00315,NA19197,NA19223,HG00109,NA19256,HG00111,HG00145,NA12249,NA12272,NA20796,HG00139,NA07056…	179	1	1	1
	1	19215970	AtoG	-	NA20531,HG00138,NA12399,HG00159,NA12874,NA20527,NA11994,NA20804,HG00251,NA12872,NA18858,NA12286,HG00315,HG00139,NA20795,NA18923,NA18511,HG00262,HG00324,NA12413,HG00309,HG00105,NA12058,HG00111,HG00145,NA20532,NA18498,NA19118,HG00351,HG00344,HG00150,NA07048,NA12775,NA18908,HG00272,NA18909,NA20756,NA20797,NA19256,NA12272,NA20516,NA20801,NA12814,NA12154,NA20509,NA19210,HG00328,NA06986,NA20752,HG00364…	84	1	0	1
	1	19216113	AtoG	-	HG00154,NA12762,NA11920,NA19099,NA18486,HG00262,HG00257,NA07037,HG00240,HG00344,NA11831,HG00174,HG00187,HG00324,NA12889,NA12154,NA20589,HG00239,HG00343,NA07347,NA18489,HG00278,NA20758,NA19152,HG00272,NA20771,NA19225,NA20757,NA20544,NA11894,NA20754,NA18912	32	1	0	1
	1	19216115	AtoG	-	HG00324,NA12760,NA19214,NA10847,NA20828,NA12890,NA12144,NA07056,NA20809,HG00266,NA11843,NA19118,NA20504,NA10851,HG00338,HG00240,HG00110,NA11931,NA06984,NA12751,NA20544,NA12399,NA20531,NA18486,HG00143,NA07051,HG00244,HG00108,NA18511,NA11920,HG00260,NA20541,HG00171,NA20517,NA11832,NA20790,NA19114,NA19197,NA19184,HG00127,NA20752,NA20539,NA18520,NA19247,HG00231,HG00372,HG00251,NA06989,HG00257,NA19099…	86	1	1	1
	1	19216127	AtoG	-	NA20536,HG00122,NA12889,NA20530,NA12156,HG00099,NA20754,HG00277,HG00251,NA20812,NA12546,NA12400,HG00378,NA19095,NA19198,NA12812,NA19236,NA06994,HG00343,HG00154,NA18923,HG00243,HG00326,NA12341,NA19131,HG00126,NA12383,NA20524,NA11994,HG00151,NA19210,HG00250,HG00138,NA19099,NA19256,NA06989,NA12815,NA19092,NA20796,NA20757,NA12144,NA18508,NA18486,NA07051,NA10847,NA18517,NA12283,NA07347,NA12760,NA19206…	150	1	1	1
	1	19216128	AtoG	-	HG00109,NA20785,HG00151,NA06994,NA19144,NA20530,NA18510,HG00256,NA20514,NA20536,HG00179,HG00281,HG00133,HG00267,NA12890,NA20544,NA12762,NA19130,NA20758,NA20811,NA19152,HG00148,NA07056,NA12272,HG00266,NA10851,NA20799,NA11894,HG00100,HG00251,NA12347,HG00146	32	1	0	1
	1	19216129	AtoG	-	NA20815,NA20758,NA07347,NA12718,NA12348	5	1	0	1
	1	19216137	AtoG	-	NA19172,NA12814,NA06986,HG00341,NA18870,NA12058,HG00160,NA18910,HG00142,HG00321,NA19235,NA19149,HG00263,HG00351,HG00328,NA12413,HG00239,NA12286,NA20539,NA20772,HG00109,NA20802,NA20815,NA20508,NA18519,NA19236,NA19198,NA20761,NA19144,HG00335,HG00233,NA18510,HG00375,HG00121,NA12873,NA20536,NA19222,NA19107,HG00243,NA12341,NA19131,NA12383,HG00100,NA11893,NA11994,HG00138,NA19256,NA12842,HG00343,NA19185…	287	1	1	1
	1	19216150	AtoG	-	HG00159,NA20785,HG00361,HG00106	4	1	0	1
	1	19216154	AtoG	-	NA19107,NA18499,NA19214,NA18486,NA19210,NA19159,NA19146,NA18519,NA12778,NA19185,HG00139,NA20802,NA19114,NA19189	14	0	0	1
	1	19216155	AtoG	-	NA18908,NA19257,HG00178,NA20826,NA19222,HG00139,NA12873,NA18510,NA12762,NA19185,NA19130,NA12760,NA19131,HG00326,NA12154,NA20799,HG00105,NA06989,NA11843,NA20798,NA12341,NA20785,NA20758,HG00108,NA20761,NA12045,HG00159,NA20525,NA20534,NA20530,NA18520	31	1	0	1
	1	19216167	AtoG	-	HG00332,NA20518,HG00263,NA12342,NA19092,NA20534,HG00349,NA12006	8	1	0	1
	1	19216175	AtoG	-	HG00325,HG00108,NA20530,HG00246,NA12775,HG00274,HG00154,HG00360,NA20541,HG00114,HG00119,NA19118,NA20514	13	1	0	1
	1	19216180	AtoG	-	HG00341,NA19184,NA12341,HG00320,NA18908,HG00148,HG00143,NA19172,NA12763,NA12348,NA11930,NA19107,NA12751,HG00105,NA19095,NA20519,NA12778,NA12890,NA12400,HG01334,NA12889,NA19114,NA19225,HG00186,NA20516,NA20773,HG00106,HG00243,NA07037,NA10851,HG00265,HG00266,HG00331,NA12842,NA18917,NA19152,NA12282,HG00338,HG00146,NA19130,NA11893,NA12286,NA20512	43	1	0	1
	1	19216185	AtoG	-	HG00154,NA19197,HG00119,HG00111,HG00278,NA10851,NA20768,NA20795,HG00341,NA10847,HG00343,NA18923,NA12287,NA12776,NA19198,NA20766,NA12058,HG00259,HG00272,NA12761,HG00171,NA20502,NA20541,HG00360,HG00231,NA06994,HG00244,HG00139,NA18510,HG00188,NA20809,NA12873,NA12842,NA20527,NA20517,NA20531,HG00151,NA19114,NA20802,NA18486,HG00177,NA12154,NA20801,HG00238,NA11931,HG01791,NA20516,NA12829,NA20518,NA20811…	227	1	0	1
	1	19216187	AtoG	-	HG00127,HG00114	2	1	0	1
	1	19216191	AtoG	-	HG00126,NA20512,HG00338,HG00179,HG00239,NA12775,HG00146,NA19131,HG00355,NA11893,NA20807,NA12234,NA18868,HG00180,NA11881,HG00262,NA12413,HG00143,HG00250,HG00311,NA12763,NA12249,NA20543,NA19146,NA19236,HG00321,NA19149,HG00263,NA18511,NA18510,NA11832,NA12762,HG00127,NA19152,NA20757,HG00375,HG00334,HG00379,HG00109,NA18502,HG00332,HG00264,HG00100,NA11831,NA12156,HG00125,NA20513,NA19130,HG00251,NA20542…	205	1	0	1
	1	19216199	AtoG	-	NA20513,HG00188,NA12778,NA12751,NA20524,NA20807,NA12044,NA12234,HG00187,NA20771,HG00372,NA11832,HG00328,NA12889,NA18511,HG00355,NA18508,HG00263,NA12546,NA12775,NA20757,NA06986,HG00239,NA12282,HG01334,HG00159,HG00338,HG00375,NA07048,HG00334,NA20772,NA20502,NA18520,NA19130,NA06984,NA20752,NA19096,HG00321,NA11843,NA20525,NA12272,NA19222,HG00109,HG00099,NA12815,NA19198,NA12249,NA11894,HG00121,HG00105…	146	1	0	1
	1	19216215	AtoG	-	HG00179,HG00284,HG00100,NA12341,NA12347,NA19222,HG00119,NA18907,HG00233,HG00331,NA19152,NA12234,HG00146,NA20752,NA12815,NA19256,HG00332,HG00320	18	1	0	1
	1	19216726	AtoG	-	NA19099,NA20512,NA12842,NA18511,NA07347,NA18489,NA18498,HG00238,HG00259,NA18868,HG00236,NA12814,NA20513,NA20761	14	1	0	1
	1	19216728	AtoG	-	NA19114,HG00131	2	1	0	1
	1	19216753	AtoG	-	NA19146,NA20517,NA11829,NA19185,NA12144,NA07051,NA20527,HG00250,NA11992,HG00131,NA19113,NA12286,NA12776,HG00356,NA12872,HG00151,HG00138,NA20802,HG00330,NA19235,HG00240,HG00255,HG00384,NA12842,NA19114,NA20530,HG00233,HG00337,NA12154,NA19172,HG00309,NA12058,NA18489,NA20787,HG00238,NA12413,NA20815,NA19189,HG00335,NA19206,HG00259,NA11830,HG00150,HG00274,NA19225,HG01791,HG00262,NA20516,NA20589,NA19190…	230	1	1	1
	1	19216755	AtoG	-	HG00380,HG00360,NA19190,HG00274,NA19189,HG00309,NA19209,NA20505,NA12873,HG00127,HG00233,NA20757,NA19198,NA10847,NA20801,NA18486,NA20826,NA12761,HG00142,HG00308,HG00188,HG00321,NA20785,NA20804,NA18511,HG00128,HG00150,NA18489,NA20516,NA18910,NA20761,NA07037,NA11930,NA12716,HG00119,NA12383,HG00365,HG00341,NA20795,NA20812,NA19118,NA18909,NA11920,NA20798,NA20515,NA19119,NA10851,NA20528,HG00097,NA12275…	229	1	1	1
	1	19216756	AtoG	-	NA12829,NA11830,NA19256,HG00344	4	1	0	1
	1	19216759	AtoG	-	NA20756,NA07037,HG00331,NA20761,NA18489,HG01791,NA20516,NA19206,HG00379,NA20521,NA19130,HG00160,NA20502,NA12399,HG00262,NA19146,NA20765,NA11995,NA11992,NA20799,NA20814,HG00239,NA19210,NA12814,HG00266,HG00130,NA19118,NA20812,HG00110,NA12400,HG00328,HG00364,NA18908,HG00365,HG00183,HG00285	36	1	0	1
	1	19216763	AtoG	-	NA12873,NA12058,NA18486,HG00346,NA12750,NA20516,NA19152,NA20812,NA07347,NA11893,NA18498,NA20799,NA12872,HG00110,NA18858,HG00338,HG00361,NA18923	18	1	0	1
	1	19216767	AtoG	-	HG00321,HG00234,NA11829,NA19256,NA19225,NA19204,NA19099,NA20795,NA10847,NA19197,HG00128,NA18868,NA19114,NA06994,NA19210,HG00379,NA20771,NA12154,NA20513,NA20761,HG00097,HG00105,NA12282,NA20785,HG00250,NA12718	26	1	0	1
	1	19216780	AtoG	-	NA19130,NA19160,HG01334	3	1	0	1
	1	19216788	AtoG	-	NA06994,HG00105,HG00259,NA20771,NA20807,NA12058,NA20589,NA19214,NA20505,NA12873,NA20541,NA18486,NA12347,HG00234,HG01334,HG00128,HG00138,HG00308,NA19171,HG00349,HG00365,NA20534,NA20756,HG00142,NA12814,NA18868,NA20785,HG00111,NA11829,NA07347,NA20814,NA12234,NA19185,HG00361,HG00239,NA07048,NA12750,NA19114,NA19200,NA20542,NA12829,NA20765,NA20525,NA06986,NA12776,NA18508,NA20795,NA20508,NA19198,NA10847…	95	1	1	1
	1	19216793	AtoG	-	NA12751,NA12347,HG00234,NA19131,NA12154,NA20519,HG00105,NA11843,NA20543,NA12249,NA11930,NA12873,NA12716,HG00327,HG00097,NA20754,NA19114,NA18486,NA06986,NA18498,HG00250,NA20795,HG00356,NA12718,NA20801,HG00128,NA12814,HG00361,NA18923,HG00183,HG00325,NA19198,HG00111,NA12275,NA10851,HG00236,NA19152	37	1	0	1
	1	19216802	AtoG	-	NA20502,HG00251	2	0	0	0
	1	19216815	AtoG	-	HG00105,NA10851,HG00234,NA19206,NA11830,NA12718,NA18909,NA11893,NA12814,NA20513,HG00327,NA20509,NA11831,HG00338,NA18858,NA18868,NA20528,HG00142,NA12347,HG00097,NA19131,NA18907,HG00146,NA19152,HG00188,NA18908,HG00276,NA20807,NA07051,HG00250,HG00183,NA12716,NA19197,NA19114,NA20802,NA11829,NA20754,HG00138,NA12155,NA19118,HG00111,NA12751,NA20765,NA18486,HG00128,NA20795,NA12383,HG00236,NA20805,NA20756…	62	1	0	1
	1	19216819	AtoG	-	NA07347,HG00356,NA06994,HG00328,NA12776,NA12155,NA19113,NA12283,NA20795,HG00361,NA20515,NA20543,HG00343,HG00346,NA19118,NA18486,NA12716,NA18909,NA18858,NA20812,NA19159,HG00154,NA20807,HG00105,NA12751,NA11831,NA19256,NA19185,NA18908,NA12829,NA19197,NA20796,NA11920,HG00108,NA20814,NA12400,HG00336,HG00234,NA20527,NA19171,NA11994,NA20509,NA12286,NA20756,HG00320,NA11843,NA06986,HG00282,NA19190,NA19095…	147	1	0	1
	1	19216855	AtoG	-	NA19184,HG00334,NA12815,NA19172,NA12842,HG00365,NA11831,NA12813,HG00341,HG00327,HG00110,NA12718,NA19159,NA18909,NA20798,NA19119,HG00183,NA19118,HG00108,NA20515,NA19160,NA20795,NA12155,NA12283,NA18498,HG00265,NA19206,HG00125,NA12154,NA18910,NA19256,NA11830,NA20513,HG01791,NA12156,NA18489,NA18502,NA12383,HG00109,HG00151,NA19152,NA12775,HG00240,NA20802,NA11829,HG00118,HG00330,HG00366,NA18912,NA20530…	218	1	1	1
	1	19216858	AtoG	-	NA19197,NA19113,HG00325,HG00244,NA19225,HG00142,NA19130,HG00238,HG00138,NA20772,NA19149,NA12286,NA10847,NA18912,NA20530,NA20527,NA19256,HG00121,NA10851,NA06986,NA12761,HG00143,NA07051,NA12287,NA20512,NA12775,HG00330,NA20532,HG00111,NA20513,HG00145,HG00269,NA20797,NA20807,HG00384,HG00151,NA19185,NA20787,HG00133,NA19114,NA20802,NA19159,NA18858,HG00110,NA12155,NA20765,HG00114,NA11832,HG00360,NA06985…	83	1	0	1
	1	19216859	AtoG	-	NA20505,HG00272,NA20519,HG01791,NA20797,HG00276,HG00097,NA11843,HG00331,NA20790,NA19200,HG00099,HG00321,NA19209,NA20513,NA20771,HG00142,NA20814,NA20509,NA19095,HG00366,HG00109,NA07056,NA12750,NA19131,HG00277,NA20543,NA11832,NA19214,HG00315,HG00130,HG00334,HG00259,NA20811,HG00285,HG00275,NA20541,NA12761,HG00262,HG00151,HG00343,NA19222,NA19118,NA06994,NA20508,HG00102,NA19146,NA07048,NA06985,NA19189…	108	1	1	1
	1	19216860	AtoG	-	HG00356,NA20758,NA18908,HG00327,NA19236,NA19095,HG00100,NA12716,HG00338,NA19225,NA20814,NA06986,NA20509,HG00183,HG00101,HG01791,NA12750,NA12829,HG00111,NA20517,HG00308,HG00142,NA11894,NA20527,HG00315,NA20543,NA18912,NA12761,HG00384,NA18870,HG00151,NA20798,NA11832,NA12058,NA19152,NA20512,HG00105	37	1	0	1
	1	19216861	AtoG	-	HG00259,NA20795	2	1	0	1
	1	19216862	AtoG	-	NA19099,NA20504,NA12383,HG00262,NA19206,NA19138,HG00126,HG00364,NA12751,HG00346,NA07347,HG00282,HG00102,NA20802,HG00309,HG00130,HG00234,HG00281,HG00360,HG00337,NA20754,NA06986,NA20814,NA20771,NA12004,HG00114,NA12827,NA20519,NA20790,NA20796,HG00236,NA12287,HG00160,NA19198,NA20544,NA19209,NA10847,NA11995,NA19197,NA20787,NA20826,NA12776,NA10851,HG00111,HG00308,NA06985,NA19236,NA19225,HG00284,NA11994…	153	1	1	1
	1	19216863	AtoG	-	HG00132,HG00285	2	1	0	1
	1	19216866	AtoG	-	NA18520,HG00337,HG00114,HG00373,NA19113,HG00238,NA12761,NA19159,NA19114,NA07056,NA20814,NA19131,HG01791,NA12873,NA20756,NA20589,HG00257,NA12829,NA11831,NA19099,NA20765,NA20509,HG00353,NA20758,HG00180,HG00338,HG00259,NA20768,NA20530,HG00321,HG00133,HG00346,NA19214,NA06994,NA12282,HG00240,HG00234,NA12155,NA19225,NA20752,NA18908,NA19152,NA07347,NA11832,HG00309,HG00334,NA12775	47	1	1	1
	1	19216868	AtoG	-	HG00343,HG00321,NA20541,NA19257,NA12716,HG00105,HG00262,NA12761,NA20802,NA19198,NA20527,NA20826,HG00373,NA07347	14	1	0	1
	1	19216869	AtoG	-	NA19235,NA12058,NA19117,NA20516,NA18910,NA11992,HG00265,NA19160,NA20517,NA12144,NA12829,HG00188,NA11995,HG00365,HG00364,HG00236,NA11920,HG00130,NA19095,HG00341,NA20801,NA18912,NA12718,NA12383,HG00133,NA20796,HG00276,NA19130,NA12814,NA18868,HG00338,HG00251,NA19131,NA19256,HG00263,NA19149,NA20814,HG00355,HG00262,HG00240,NA12775,NA20826,HG00308,NA12716,NA20799,NA11831	46	1	0	1
	1	19216870	AtoG	-	HG00114,NA20814,NA20796,NA20804,NA18486,NA12761,HG00263,NA20752,HG00365,HG00109,NA18498,HG00240,NA11832,HG00142,HG00338,NA12716,HG00242,NA20524,NA12814,NA12413,NA12813,NA12156,NA07037,NA06994,NA12775,NA20765,HG00277,HG00328,HG00255,NA12399,HG00326,NA12872	32	1	0	1
	1	19216875	AtoG	-	NA20519,NA19222,NA20513,HG00262,NA20771,NA19184,HG00353,NA12399	8	1	0	1
	1	19216879	AtoG	-	HG00119,HG00251,NA19130,NA11930,NA20589,HG00365,HG01334,HG00315,NA19225,NA19117,NA20768,HG00160,NA20790,HG00325,NA19096,NA12775,HG00111,NA18909,NA11920,HG00284,NA12154,NA12399,NA19131,HG00257,NA19118,HG00355,NA19107,NA12156,HG00234,NA12842,NA20513,NA20797,NA12045,NA11893,HG00349,HG00373,NA20771,NA19114,HG00125,NA20765,NA12716,NA12827,NA11894,NA12004,HG00151,NA12751,HG00384,NA20802,HG00337,NA18923…	164	1	1	1
	1	19216886	AtoG	-	NA12058,NA20530,NA19201,NA20756,NA12751,NA18498,NA07048,NA18502,NA18511,HG00334,NA19118	11	1	0	1
	1	19216887	AtoG	-	NA19095,HG00372,NA11831,HG00332,NA20814,HG00239,HG00111,HG00242,NA12751,NA12283,NA20826,HG00281,NA12761,NA19222,HG00330,HG00361,HG00356,NA11830,NA20787,HG00118,HG00338,NA20756,HG00346,HG00334,NA12058	25	1	0	1
	1	19216918	AtoG	-	NA20752,HG00325,NA12283,NA20796,HG00133,NA20543,HG00346,NA12842,NA18907,NA19146,NA19206,NA07037,NA06986,HG00285,NA19236,HG00114,NA12827,NA07051,NA19159,NA06994,NA18502,HG00245,NA12716,NA20798,HG00326,NA18917,NA19130	27	1	0	1
	1	19216923	AtoG	-	HG00114,NA11894,NA19214,HG00129,NA20515,HG00255,HG00383,NA12872,NA19248,NA19138,NA20798,HG00133,NA19118,HG00331,NA20509,NA20527,NA19159,HG00145,HG00346,NA12156,NA19198,NA11992,NA12058,NA12827,NA11832,NA06986,HG00157,HG00341,HG00372,NA12814,NA20790,HG00110,NA12045,HG00138,NA19206,NA19256,NA11920,NA19184,NA19225,NA06994,NA18502,NA20502,HG00278,HG00251,NA12813,HG00326,NA12750,NA20752,NA12716,HG00244…	74	1	0	1
	1	19216962	AtoG	-	NA12873,NA12348,NA20796,HG00382,NA20771,NA18858,HG00373,NA11893,NA18870,NA20543,HG00355,NA18520,NA06985,NA19131,HG00284,NA20807,NA20758,HG00146,NA20773,HG00285,HG00366,NA12718,NA07048,NA19171,NA20756,NA18912,NA12829,HG00384,NA12144,HG00275,HG00151,NA20527,HG00132,NA20805,NA20517,HG00272,HG00250,NA20516,HG00143,NA11892,NA12763,HG00276,NA12842,NA07037,HG00311,HG00133,NA11843,HG00337,NA20759,NA11894…	303	1	1	1
	1	19216963	AtoG	-	NA20754,HG00266,NA06986,HG00267,NA19200,HG00129,HG00328,NA20502,NA20532,NA12874,NA19201,HG00268,HG00274,HG00281,HG00309,NA07347,NA19204,NA19152,NA12272,HG00280,HG00381,HG00380,NA19146,HG00142,HG00246,NA18511,HG00263,HG00182,NA20528,HG00321,NA11832,NA12275,NA12890,NA19198,NA19189,HG00356,NA19190,NA10851,NA20774,NA20799,NA20804,NA18486,NA19197,NA20826,HG00244,NA20504,NA10847,HG00114,NA20811,HG00122…	277	1	1	1
	1	19216965	AtoG	-	NA20530,NA20770,HG00282,NA19092,NA19171,NA20502,NA12812,HG00338,HG00346,NA19160,NA20521,NA12283,NA20525,NA20804,NA07051,NA12383,HG00234,NA19198,HG00262,HG00356,NA11894,NA19210,HG00274,NA20765,HG00102,NA12750,HG00120,NA20805,NA19236,NA12045,NA11843,NA18489,NA12830,HG00096,NA12413,NA20756,NA20524,NA20799,NA18520,NA19214,NA06986,NA19138,HG00132,NA11830,HG00265,HG00320,NA20795,NA18912,HG00266,NA12815…	288	1	1	1
	1	19216971	AtoG	-	HG00182,NA19107,NA12874,HG00133,NA19152,HG00127,NA10851,NA07037,HG00246,HG00142,HG00101,NA18910,NA20774,NA07056,HG00327,NA12872,HG00366,NA12275,HG00277,HG00334,NA19209,NA12400,HG00118,NA11995,NA20532,NA19257,NA19099,HG00315,NA19222,NA18508,NA20811,NA19185,HG00122,NA20808,NA12154,NA19113,NA20517,HG00151,HG00263,NA19149,NA18511,NA12342,NA19114,NA20787,HG00331,HG00256,NA18498,HG00160,NA20524,NA20799…	278	1	1	1
	1	19216978	AtoG	-	HG00319,HG00320,HG00381,NA20536,NA12842,NA12348,NA20796,NA12874,HG00181,NA12751,NA11843	11	1	0	1
	1	19216995	AtoG	-	NA11995,NA20581,NA12814,NA19197	4	0	0	0
	1	19217282	AtoG	-	HG00138,NA12399,NA19225,NA12006,NA19159,HG00131,NA12813,NA20507,NA19209,HG00097,NA12400,HG00234,NA12347,NA18868,HG00126,NA11918,HG00325,NA12761,NA12890,NA20798,HG00379,NA20786,NA20589,HG00277,NA12842,HG00188,NA12275,NA12154,NA20765,HG00282,HG00159,NA11843,NA20799,NA10851,HG00139,NA18912,HG00321,NA20828,NA20509,NA19096,HG00183,NA12760,NA07056,NA20773,HG00355,NA18910,HG00130,HG00338,NA12286,HG00256…	85	1	0	1
	1	19217289	AtoG	-	NA19214,HG00356,NA19114,NA19222,HG00365,HG00114,HG00379,NA19159,NA19146,NA18908,HG00159,NA18508,NA12842,NA18912,HG00349,NA18519,NA19093,NA19152,NA18917,NA12813,HG00334,HG00338,HG00111,NA20812,HG00131,NA12814,HG00325,NA19190,NA18868,NA06986,HG00383,NA12156,NA12874,NA18909,HG00324,NA12775,NA19175,NA18489,NA19096,HG00375,NA20796,HG00234,NA19095,NA10851,HG00138,HG00341,HG00281,HG00277,NA20801,HG00097	50	1	0	1
	1	19217291	AtoG	-	NA20530,HG00127,HG00309,HG00133,NA06994,NA19152,NA19247,HG00262,NA20757,HG00365,NA19223,HG00361,HG00282,NA19236,HG00384,HG00336,NA12718,NA19092,HG00259,NA20766,HG00143,NA19171,HG00355,NA19204,HG00239,NA20509,HG00109,NA18933,NA12399,NA19248,NA12775,NA12717,HG00159,HG00138,HG00326,NA11931,NA19130,NA07056,HG00105,HG00277,NA20508,HG00285,HG00281,HG00272,NA12872,NA20796,NA20756,HG00349,NA06986,HG01791…	196	1	1	1
	1	19217303	AtoG	-	HG00234,NA12775,HG00383,NA12383,NA18933,NA20797,HG00328,NA18502,NA20530,HG00272,HG00108,NA12286,NA20509,NA20515,NA19095,NA20525,HG00126,NA20503,HG00159,NA20773,NA20756,NA20512,HG00282,NA06986,NA19172,HG00109,NA12399,NA19107,HG00281,NA12760,NA19117,NA19130,NA11831,NA12812,HG00265,HG00242,NA20802,NA11920,NA20828,HG00096,HG00105,HG00132,HG00338,NA19175,NA12287,HG00231,NA11830,NA11894,NA19236,NA19138…	200	1	1	1
	1	19217304	AtoG	-	HG00375,HG00114,NA11881,HG00188,NA20765,NA11843,NA19248,HG00149,NA19190,NA12890,NA12154,HG00111,HG00325,NA20503,HG00255,HG00240,NA06986,NA20519,NA11831,NA11892,NA20828,NA19114,HG00096,NA18912,NA10851,NA11894,NA20509,NA12275,HG00277,NA12761,HG00109,NA12873,NA07037,HG00383,NA20797,NA19096,NA20772,HG00183,NA19225,NA18868,HG00336,HG00355,HG00131,NA19159,NA12144,NA12716,NA18923,HG00379,HG00231,NA18908…	104	1	0	1
	1	19217305	AtoG	-	HG00326,NA19222,NA12761,HG00375,HG00138,HG00183	6	1	0	1
	1	19217326	AtoG	-	HG00321,HG00236,HG00383,HG00355,NA12830,NA20798,NA12750,NA18912	8	1	0	1
	1	19217330	AtoG	-	HG00315,NA12058,NA19214,NA19119,NA19146,HG00325,NA19222,HG00187,NA20752,HG00108,NA07347,NA12761,HG00321,NA19184,NA18508,NA19138,HG00346,NA12234,NA11830,NA12400,NA20812,NA20505,HG00239,NA12399,NA19159,NA19257,NA18923,HG00380,HG00375,HG00278,NA19225,NA20797,NA19153,NA18908,NA19117,NA20509,NA20519,HG00114,NA12830,NA18498,NA20798,NA07056,NA19099,NA20515,NA19172,NA20801,NA12347,NA19095,NA19131,NA11995…	109	1	0	1
	1	19217331	AtoG	-	NA18489,HG00278,HG00375,NA20752,NA20589,HG00108,HG00138,NA20516,NA07056,NA11832,NA11831,NA11995,NA19095,HG00187	14	1	0	1
	1	19217356	AtoG	-	NA20503,HG00365,NA19152,NA19247,NA07056,HG00239,NA18498,HG00353,HG00127,HG00278,HG00133,NA19095,HG00246,NA07347,NA12830,NA19159,HG00143,NA19222,HG00105,HG00138,NA20761,NA19146,NA20508,NA12272,NA19214,NA12154,HG00361,NA20516,NA19131,HG00262,NA20801,HG00356,NA10847,NA19223,NA12750,NA18858,NA06994,HG00251,NA11994,NA12156,NA12283,HG00326,NA19099,HG00338,NA20773,NA19235,HG00187,NA19189,NA19117,NA12286…	148	1	1	1
	1	19217382	AtoG	-	NA19171,HG00380,NA19206,HG00108,NA19117,NA12273,NA19146,HG00278,NA19114,NA12814,NA19131,NA20761,NA11931,NA20517,NA20796,NA12156,HG00375,NA12890,NA12815,HG00328,NA12058,NA11831,NA12399,HG00384,HG00259,NA12718,HG00143,HG00126,HG00346,NA12874,HG00349,HG00133	32	1	0	1
	1	19217385	AtoG	-	NA11831,HG00338,NA12717,NA20507,NA20826,NA20509,NA18868,NA12813,HG00244,NA20512,HG00108,NA19204,NA12287,NA18502,NA07048,HG00328,HG00099,HG00114,NA20513,NA12890,NA11843,NA20514,NA19093,HG00237,HG00326,NA20765,NA11881,HG00139,NA12842,NA18489,NA12045,NA11894,NA12413,NA12775,NA20756,HG00159,NA20796,NA20530,NA19092,HG00236,NA12718,NA12286,NA19172,NA12156,NA11893,NA19149,HG00182,HG00188,NA07037,NA19114…	172	1	1	1
	1	19217400	AtoG	-	NA12156,HG00133,NA19159,NA20512,NA19200,NA12872,NA12283,HG00285,HG00111,NA18508,HG00138,HG00375,NA20508,NA12273,NA11894,HG00139,NA12234,NA20766,NA20756,NA20765,HG00259,NA20589,NA18917,NA19117,HG00159,HG00097,NA11994,NA12154,NA12286,NA19114,NA12413,NA12282,NA12004,NA06994,HG00355,NA12776,HG00343,NA11830,HG00321,NA19171,HG00131,HG00188,NA20807,NA12399,NA19092,NA12829,NA11831,NA20513,HG00099,NA11992…	55	1	0	1
	1	19217401	AtoG	-	NA11931,NA20512,NA12144,NA19137,NA18909,NA20758,HG00281,NA19095,NA20518,NA07048,NA12234,NA12829,NA12156,HG00361,HG00139,HG00154,NA19131,HG00263,NA19114,NA12872,NA20519,HG00126,NA19201,NA12413,NA20802,HG00187,NA12717,NA12716,NA18519,HG00159,NA12842,HG00346,HG00315,NA12814,NA12760,NA12399,NA20513,HG00188,HG00328,NA18508,NA19200,NA18910,HG00355,HG00353,HG00111,NA20509,NA12272,HG00114,HG00183,HG00349…	73	1	0	1
	1	19217405	AtoG	-	NA20786,NA20798,NA18909,HG00341,HG00371,HG00246,NA20505,NA20756,HG00154,NA19257,NA12716,NA20517,NA12413,NA20519,NA18519,HG00105,NA12282,HG00356,NA19206,NA07037,HG00343,NA20752,HG00349,NA19146,HG00262,HG00271,NA20801,NA12273,HG00336,HG00142,NA12718,NA12400,NA19236,NA12399,NA19149,HG00285,NA12283,NA18912,NA12827,NA12842,NA18858,NA11893,NA11830,NA19153,HG00097,NA11994,NA20524,HG00379,HG00188,NA20811…	136	1	0	1
	1	19217414	AtoG	-	HG00096,HG00154,HG00183,NA20799,NA19206,NA19248,HG00179,NA20541,HG00159,HG00149,NA12286,NA18908,NA20761,NA11831,HG00143	15	1	0	1
	1	19217425	AtoG	-	HG00133,HG00259,NA19130,NA12272,NA12761,NA20516,NA12842,NA20766,NA11881,HG00343,NA12286,NA19175,NA12827,NA20795,HG00379,HG00380,NA18508,HG00361,NA19197,HG00328,HG00114,HG00271,NA20507,HG00105,NA20509,HG00138,NA20796	27	1	0	1
	1	19217427	AtoG	-	NA20525,NA12890,NA11918,NA12283,NA20795,NA19160,NA20512,NA19190,HG00251,NA12272,HG00346,HG00126,HG00132,HG00111,HG00237,HG00369,NA12814,NA07037,NA19189,NA12347,NA12830,HG00142,HG00240,NA20796,NA18868,NA18908,NA11843,NA19093,NA18907,HG00188,NA20513,HG00328,NA12760,NA12778,NA20524,NA19153,NA18858,NA11830,NA18498,NA12044,NA18923,NA10847,NA19171,NA11992,NA18909,NA10851,HG00373,HG00239,NA19247,NA20799…	176	1	0	1
	1	19217437	AtoG	-	NA12275,HG01334,NA10851,HG00309,NA19223,NA12006,NA20798,NA12873,NA20799,HG00366,NA20505,NA20796,NA12399,HG00239,HG00336,HG00096,NA12815,HG00097,NA19248,NA11830,NA20512,HG01791,NA12058,NA12272,HG00278,NA12413,NA19117,NA18933,NA18917,NA20519,HG00267,NA07051,NA20757,NA06986,NA18489,NA20766,NA11831,NA07347,NA19114,HG00187,NA20802,NA19095,HG00271,NA12347,NA12842,NA20589,NA12718,NA20807,NA12234,NA20541…	104	1	0	1
	1	19217440	AtoG	-	NA11881,HG00324,NA07347,NA20543,NA20799,HG00180,NA20514,HG00105,NA20761	9	1	0	1
	1	19217448	AtoG	-	HG00128,HG00097	2	1	0	1
	1	19217454	AtoG	-	NA19256,HG00180,HG00328,HG00099,NA12058,NA12814,HG00109,NA12872,NA20503,NA19225,NA12413,NA11992,NA19107,HG00097,NA18912,NA18917,NA20541,NA07056,NA12282,HG00237,NA11994,HG00353,NA12718,NA20766,NA20756,HG00278	26	1	0	1
	1	19217460	AtoG	-	HG00338,NA19189,NA20541,NA20787,NA19206	5	1	0	1
	1	19217470	AtoG	-	HG00133,HG00338,NA10851,NA12058,NA19225,NA12717,HG00154,NA12814,NA11894,NA11992,NA19114,NA20517,HG00105,HG00259,NA19206,NA20812,NA12383,NA20756,NA19149,NA12282,HG00328,NA18917,NA12156,NA12842,NA19201,NA12776,HG00355,NA12873,NA20519,NA10847,NA20787,HG00179,NA12716,NA12829,HG00143,NA20765,NA12275,NA19189,NA20802,NA20513,HG01791,NA20512,HG00139,HG00174,NA12775,HG00188,HG00380,NA20589,HG00187,NA20790…	105	1	0	1
	1	19217479	AtoG	-	NA11892,NA20504,HG00234,NA11995,NA07051,NA19201,HG00280,NA20790,NA20516,HG00128,NA18909,HG00375,NA18502,NA07056,NA07048,NA20518,NA20519,NA11920,NA11831,NA12716,HG00099,HG00353,HG00325,HG00362,HG00105,HG00346,NA12154,HG00142,HG00246,HG00343,NA12272,HG00138,NA20513,NA19190,NA20795,HG00154,NA07037,HG00371,HG00114,NA12874,HG00267,NA19172,NA12399,NA19247,NA20505,NA19107,NA19197,NA12234,HG00263,HG00328…	199	1	1	1
	1	19217503	AtoG	-	NA20786,NA11920,NA19214,NA07048,HG00343,NA18502,HG00174,NA19095,NA12045,HG00127,NA06986,HG00109,NA11831,NA19248,NA19159,NA11881,NA19107,NA20807,HG01334,NA19137,HG00106,NA07347,NA12842,NA10851,NA12873,NA12006,HG00138,HG00375,NA19114,NA12144,NA12283,HG00180,NA19175,NA18910,NA12273,HG00328,NA19222,HG00105,HG00246,HG00349,NA19257,NA20801,HG00369,HG00371,HG00111,NA18508,NA12286,NA18868,NA19206,NA18912…	52	1	0	1
	1	19217508	AtoG	-	NA12156,HG00277,HG00346,NA19172,NA12842,NA20518,NA11831,NA11892,HG00099,HG00109,NA19214,NA19095,HG00259,HG00353,NA20828,NA12872,HG00097,NA11920,NA12761,NA19256,NA19223,NA20771,NA12776,HG00149,HG00349,NA20513,NA10851,HG00174,NA19130,NA19190,NA19159,HG00361,NA12829,HG00375,NA19175,HG00133,NA20541,HG00180,NA11832,NA19119,NA20519,NA11843,NA12045,NA19225,HG00369,NA07048,NA19248,HG00114,NA12814,NA12234…	119	1	0	1
	1	19217511	AtoG	-	HG00259,HG00174,HG00114,NA20519,NA19131,HG00309,HG00365,NA12872,NA19095,HG00131,NA20518,HG00111,NA19172,NA19171,NA12873,HG00237,HG00133,HG00325,HG00149,NA20801,HG00109,HG00349,NA12272,NA07347,NA18868,NA06986,NA20797,HG00355,NA18912,HG00338	30	1	0	1
	1	19217515	AtoG	-	HG00349,NA19175,HG00259,HG00111,HG00138,NA12776,HG00154,NA20513,HG00099,NA18502,HG00263,HG00174,NA19214,NA12234,NA20518,NA19190,NA19172,NA20796,NA10851,NA19095,NA19223,NA19189,NA19225,NA19153,HG00143,NA12399,NA12775,NA12716,HG00105,NA11995,HG00106,HG00355,HG00375,NA11832,NA12155,HG00267,HG00182,NA07037,HG00369,NA06986,NA20765,NA20519,NA20802,NA19130	44	1	1	1
	1	19217646	AtoG	-	HG00099,HG00236	2	0	0	0
	1	19218306	AtoG	+	HG00183,HG00099	2	0	0	0
	1	19258972	AtoG	+	HG00159,HG00280,NA12750,HG00332,NA20507,NA20773,HG00268,HG00371,NA20768,NA20813,NA20544,HG00122,HG00324,HG00356,NA20757,HG00236,HG00323,NA12872,HG00232,NA19184	20	0	0	0
	1	19258973	AtoG	+	NA20813,HG00122	2	0	0	0
	1	19258999	AtoG	+	NA06994,NA11840,HG02215,HG00235,NA20531,NA20513,NA12830,HG00099,HG00362,HG00264,HG00369,NA20809,NA12287,NA07048,HG00231,NA11831,HG00186,NA19236,NA19130,HG00146,HG00336,NA20797,NA12815,NA20801,HG00345,HG00320,NA20507,HG00358,NA20514,NA06985,NA19121,NA20769,NA20754,NA20543,HG00332,HG00306,NA20803,HG00371,NA19131,NA20589,NA19159,HG01334,NA12004,HG00257,NA19093,HG00132,NA20811,NA19222,HG00189,HG00131…	357	1	1	1
	1	19259008	AtoG	+	NA12045,NA12761,NA20802,NA20514,NA20819,NA20539,NA20506,NA18861,HG00157,NA12283,HG00155,HG00281,HG00128	13	1	1	1
	1	19259013	AtoG	+	NA20768,HG00114,NA20542,NA20805,NA19137,HG00243,HG00353,HG00324,HG00232,HG00136,HG00121,HG00361,NA07347,HG00267,HG00183,HG00382,HG00129,HG00115,HG00146,HG00284,NA12749,HG00250,HG00128,NA20539	24	1	1	1
	1	19259025	AtoG	+	NA20514,NA07347,HG00158,NA20765,NA20802,HG00183,NA12413,HG00267,NA18870,HG00328,NA20507,NA19171,NA20804,NA20541,NA12045,HG00311,NA20521,NA20796,HG00325,NA20813,NA12751,NA20506,NA12761,HG00244,HG00129,NA12283,HG00096,HG00321,NA12004,HG00101,NA19207,HG00272,NA11992,NA12144,HG01791,NA12273,NA20509,NA19209,HG00127,NA19235,HG00361,HG00339,HG00384,NA18917,NA20515,NA11918,NA12272,NA20814,HG00273,NA12275…	216	1	1	1
	1	19259059	AtoG	+	NA20513,NA20586,NA19175,NA20520,NA18499,NA18517,NA20543,NA19095,NA20754,HG00338,HG00332,NA20815,HG00267,NA20770,NA20806,NA20803,NA12282,HG00239,NA06994,HG00371,HG00382,NA20544,HG00137,NA20589,NA18907,NA11893,NA12287,HG00251,HG00375,HG00350,HG00102,NA18858,NA07048,NA19130,HG00274,NA20503,NA11831,HG00231,NA12775,NA19172,HG00245,NA19236,NA12156,HG00362,NA11843,HG00171,HG00099,HG00264,HG00186,NA20531…	419	1	1	1
	1	19259060	AtoG	+	NA12287,HG00232,NA19130,NA20536,HG00326,NA11831,HG00131,HG00275,NA20507,NA20757,NA20801,NA18917,HG00145,HG00180,HG00273,NA12750,NA20581,HG00309,HG00277,NA20514,HG00236,NA12872,NA20752,NA18519,HG00321,NA20802,HG00182,HG00260,HG00353,NA11992,HG00142,NA19207,NA12778,NA12348,NA20813,NA12812,HG00149	37	1	1	1
	1	19259943	AtoG	+	HG00130,NA20811,HG00173,HG00118,HG00309,HG00138,NA19257,NA20506,HG00233,HG01789,HG00171,HG00155,NA20520,HG00360,HG00188,NA18508,NA20805,NA18510,HG00187,HG00380,HG00261,HG00129,HG00319,NA11881,NA12045,HG00139,NA12718,NA12762,HG00122,NA19184,NA19256,NA20766,HG00330,NA11831,HG00121,NA20508,NA20757,HG00332,NA20756,HG00371,NA20773,HG00159,HG00271,HG00186,NA20528,HG00350,NA20828,NA12750,NA20510,HG00179…	99	1	1	1
	1	19259961	AtoG	+	NA20802,NA20756,NA18912,HG00369,NA12045,HG00261,NA20539,HG02215,HG00114,HG00366,HG00119,NA20530,NA12413,NA12842,NA20766,NA12873,HG00376,NA12154,NA18511,HG00326,NA06986,NA10851,NA11831,NA18861,HG00245,HG00231,HG00238,HG00375,NA20503,HG01789,NA20502,NA07037,HG00188,NA18499,NA18510,NA12275,HG00372,NA12872,NA20528,HG00277,HG00327,NA20524,NA20786,NA20806,NA12249,HG00233,NA12058,NA20811,NA10847,NA19247…	287	1	1	1
	1	19259964	AtoG	+	HG00101,NA12286,NA18912,HG00180,HG00361,NA20802,HG00327,HG00384,NA20790,HG00130,HG00129,NA11992,HG00341,NA06984,HG00311,HG00142,NA11994,HG00271,NA12776,HG00150,NA11881,HG00097,NA12718,NA20539,HG00323,HG00139,NA20774,NA20828,NA20538,NA20808,HG00122,NA19223,NA12827,NA18861,HG00177,NA20757,NA20504,HG00145,HG00253,NA20805,HG00259,NA12717,NA20799,HG00176,NA19171,NA12275,HG00149,NA12341,NA12762,NA20773…	243	1	1	1
	1	19259984	AtoG	+	HG00262,HG00362,NA20757,NA20806,NA12827	5	1	0	1
	1	19259985	AtoG	+	NA20502,HG00362,NA20802,HG00096,NA20801,HG01789,HG00330,HG00236,NA20814,NA07037,HG00182,HG00369,NA20828,NA20757,NA20773,NA20806	16	1	0	1
	1	19259986	AtoG	+	NA20813,NA12341,NA20773,NA20757,NA19146	5	1	0	1
	1	19260003	AtoG	+	HG00096,HG00250,NA12283,NA10851,NA20771,NA20828,NA20524,NA19235,HG00130	9	0	0	0
	1	19260007	AtoG	+	NA20534,HG00177,HG00182,HG00188,NA07037,HG01789,HG00238,NA12342,HG00263,NA10851,NA18511,NA12154,NA12814,HG00151,HG00118,HG00278,NA20790,HG00384,HG00361,NA12144,NA11930,NA11832,HG00364,HG00243,NA12762,NA20538,HG00323,NA12718,HG00097,NA12776,NA20508,NA12155,NA11995,NA12348,NA12889,HG00178,HG00187,HG00324,NA19099,HG00237,HG00334,HG00189,HG00108,HG00315,HG00174,NA11829,HG00253,NA20803,HG00341,NA20799…	263	1	1	1
	1	19260025	AtoG	+	NA20786,HG00115,NA12348,NA20536,HG00379,HG00364,NA12341,NA19201,NA12282,HG00271,HG00233,NA12873,NA20529,HG00310,NA12815,HG00188,NA12249,NA18505,NA12342,NA19209,NA20799,HG00101,NA19257,NA12872,NA20757,HG00273,HG00133,HG00118,NA20790,NA12843,NA12347,NA12275,NA20528,NA19207,HG00311,HG00182,NA19248,NA12814,HG00131,NA18511,NA12044,HG00256,HG00335,HG00141,HG00179,HG00122,NA18916,HG00138,NA12234,HG00344…	334	1	1	1
	1	19260026	AtoG	+	HG00234,HG00345,NA12005,HG00114,HG00186,NA20520,HG00099,NA11831,NA20809,NA12751,HG00276,NA20512,NA12400,NA20796,HG00325,NA19143,NA11843,NA20535,HG02215,HG00320,NA19130,HG00362,NA12775,HG00231,HG00125,NA19214,HG00346,HG00105,NA19160,NA19093,HG00132,HG00185,NA20772,HG00344,HG00109,HG00371,NA20801,HG00157,HG00127,NA12340,NA20519,NA20754,NA19256,NA12004,HG00258,HG00141,NA20810,NA19153,HG00358,HG00121…	404	1	1	1
	1	19260038	AtoG	+	NA11831,NA12889,NA11995,NA12762,HG00243,NA12873,NA11832,HG00371,NA20801,HG00157,HG00127,NA12340,HG00271,HG00259,NA12004,HG00258,HG00122,NA20828,HG00159,NA20773,HG00326,HG00250,HG00319,HG00096,NA20802,HG00097,HG00130,NA20805,NA20756,NA12045,NA11920,HG00311,NA12341,HG00187,NA20768,NA12249,NA20809,HG00308,NA07048,HG01789,HG00238,NA12342,HG00369,NA07037,NA12813,HG00244,NA20507,NA18486,NA20766,HG00321…	279	1	1	1
	1	19260047	AtoG	+	NA20507,HG00365,NA12004,HG00330,NA20774,HG00259,NA20761,HG00327,HG00274,NA20796,NA20543,NA12282,NA19095,NA12340,NA19201,NA19121,NA06994,NA12546,NA18923,HG00136,HG00138,NA20582,NA11931,NA07048,HG01789,NA20585,NA12275,HG00238,NA20528,NA20531,NA12813,NA20809,HG00369,NA07037,HG00378,NA19207,NA20527,NA12842,NA11831,HG00376,HG00309,NA07347,NA12750,HG00250,NA20756,NA20773,NA20812,NA20828,NA18519,HG00320…	162	1	1	1
	1	19260060	AtoG	+	HG00266,NA19223,NA19099,HG00250,NA19143,NA12872,NA19204,HG00109,NA07357,HG00276,HG00176,NA11840,NA19222,NA20586,HG00261,NA20803,HG00326,HG00236,NA20756,HG00141,NA18511,HG00375,NA20819,HG00116,NA20530,NA12890,HG00311	27	1	1	1
	1	19329081	AtoG	+	NA20541,HG00378,NA20772	3	1	0	1
	1	19329086	AtoG	+	HG00274,HG00238	2	1	0	1
	1	19329110	AtoG	+	NA19152,HG00378	2	1	0	1
	1	19329126	AtoG	+	NA11832,NA20527	2	1	0	1
	1	19329136	AtoG	+	NA12842,NA18912,HG00360,HG00372,HG00112,NA07048,NA18517,HG00384,HG01789,NA12275,NA12287,NA20585,NA12813,NA10847,NA20528,HG00238,NA19248,NA12874,NA19114,NA19207,HG00236,HG00261,HG00242,NA20518,NA19171,HG00260,HG00131,NA12750,NA07357,HG00132,NA19152,HG00185,HG00324,NA11894,NA19197,NA12776,NA19223,HG00345,NA11994,HG00189,NA19236,HG00355,HG00180,NA12413,NA20814,NA12005,HG00237,HG00145,NA19093,NA12775…	270	1	1	1
	1	19329142	AtoG	+	NA12348,NA19130	2	0	0	1
	1	19329189	AtoG	+	NA12399,NA20792,NA12156,NA20502,NA20772,NA18912,NA19130,NA18934,NA19171,NA19093,NA07056,NA18498,NA20803,HG00262,NA11881,NA12348,HG00138,NA18517,HG00150,NA11831,NA18873,HG00365,NA19152,HG00236,NA12283,NA19247,NA12400,NA19098,NA19189,NA19197,NA11832,NA12815,HG00328,NA12873	34	1	0	1
	1	19329202	AtoG	+	NA19099,NA20752,NA07051	3	0	0	0
	1	19329203	AtoG	+	NA19096,HG00138,NA19185,NA20803,NA12751,NA20801,NA19257,NA19143,NA19099,NA19131,NA12156,HG00379,NA19152,NA18511,NA19116,NA12776,NA18912,NA18517,NA20828,NA11843,NA11894	21	1	0	1
	1	19600836	AtoG	+	NA20527,NA06986	2	1	0	1
	1	19600837	AtoG	+	HG00355,NA20509,NA06986	3	1	0	1
	1	19600869	AtoG	+	NA18511,NA20765,NA20527,HG00117,NA06986,NA19095	6	1	0	1
	1	19605789	AtoG	+	HG00117,NA20527,HG00355	3	1	0	1
	1	19694501	AtoG	-	HG00176,HG00274,HG00367,NA12399,NA18861,NA19114,NA19204,NA19235	8	0	0	0
	1	19740789	AtoG	-	NA06985,NA20811	2	0	0	0
	1	19910238	AtoG	+	NA12156,HG00117,HG00244,NA20518	4	0	0	0
	1	19911267	AtoG	+	HG00117,HG00360,HG00108,HG00097,HG00345,NA12399	6	0	0	0
	1	19911850	AtoG	+	NA20518,NA12154,HG00097,HG00149,HG00133,NA12156,NA12399	7	0	0	0
	1	19911973	AtoG	+	NA12399,NA12004,HG00244,NA12156,HG00179,HG00117,NA11832,NA11892	8	0	0	0
	1	20646017	AtoG	-	NA12399,NA12043,NA18923,NA20527,NA19118,NA20509,NA12775,NA20543,NA19247,HG00117,NA20518,HG00315,HG00108,NA19144,NA19248,NA12004,HG00309,NA12842,HG00268,NA18858,NA18912,HG00266,NA06985,NA20810,HG00284,NA19131,NA18511,NA12413,NA11995,HG00337,NA20796,NA19159,HG00334,NA11892,HG00338,NA19206,HG00269,NA20529,HG00114,HG00240,HG00378,NA20803,NA19207,HG01791,HG00138,NA20785,NA12829,NA12340,HG00346,NA19200…	59	1	1	1
	1	20646029	AtoG	-	NA20757,NA12286,NA19144,HG00234,NA11832,HG00266,NA19247,NA12004,HG00315,NA20518,NA18912,HG00268,NA20810,NA12399,NA11992,HG00157,NA12340,NA20796,NA11995,HG00258,NA12413,HG00378,NA11892,NA18511,HG00334,NA20527,NA19206,HG00114,NA20529,NA06985,HG00174,NA19207,HG00338,HG00269,HG00346,NA12043,NA20785,NA19159,HG00117,NA20509,NA12006,NA18858,NA19131,HG00138,NA20803,NA12842,HG00108,HG00240,NA19248,HG01791…	57	1	1	1
	1	20646030	AtoG	-	HG00114,NA12399,NA20810,NA12413,HG00284,NA19247,HG00266,HG00338,NA19144,NA06994,NA12043,HG00258,HG00244,HG01791,NA11832,NA12829,HG00346,NA19200,HG00117,NA12286,NA19206,NA18923,HG00108,NA12842,HG00334,HG00337,NA20529,NA19207,HG00309,NA20796,HG00157,NA12004,NA18858,NA20505,NA19248,NA20757,NA11992,NA19118,NA19159,NA20785,HG00138,HG00349,HG00174,NA11892,NA20527,HG00269	46	1	1	1
	1	20646031	AtoG	-	NA18858,NA19247,NA20803	3	1	0	1
	1	20646039	AtoG	-	NA12413,NA06994,NA20543,HG00346	4	1	0	1
	1	20646054	AtoG	-	NA12004,HG00240,NA12006,HG00114,HG00117,NA12874,NA20509,NA12413	8	1	0	1
	1	20646068	AtoG	-	NA18858,NA19159,NA19190,NA19200	4	1	0	1
	1	20646069	AtoG	-	HG00119,NA20513,NA12399,NA18502,NA06994,HG00337,NA20803,HG00334,NA20529,HG00234,HG00309,NA18912,NA20516,NA20509,NA19200,NA20543,HG00157,NA19190,HG00258,NA12413,NA12340,HG01791,NA20505,NA19247,HG00114,HG00338,NA11995,NA20796,NA19248,HG00276,NA19144,NA20785,HG00315,NA20810,HG00268,NA20765,NA12006,NA12775,NA20518,NA12842,HG00349,HG00174,HG00138,HG00108,NA19118,HG00378,NA19159,HG00240,NA20527,NA18511…	56	1	1	1
	1	20646080	AtoG	-	HG00315,NA20529,HG00284,NA20527,HG00117,HG00244,NA20803,NA12413,NA18858,NA11995,NA20513,NA19144,NA20765,NA20509	14	1	0	1
	1	20646092	AtoG	-	NA20513,HG00276,NA19144,NA12006,NA07347,NA18511,NA19207,NA19247,NA11832,NA20527,NA19248,HG00117,NA12399,NA20796,HG00315,NA20516,NA19159,NA20509,NA12413,NA20765,NA18912,NA20757,HG00138	23	1	1	1
	1	20646101	AtoG	-	NA20765,NA20516,NA18511,HG00268,NA20529,HG00119,NA12006,HG00315,NA18912,NA19200,NA19144,NA20527,NA19207,NA12775,NA12413,HG00244,HG00117,NA12340,HG00284,NA11995,NA19248,NA11832,NA19190,NA12286,NA18502,NA07347,NA12399,NA12874,NA12751,HG00138	30	1	1	1
	1	20646106	AtoG	-	NA19144,NA19248,NA20765,NA11832,NA12006,NA19207,NA20527,NA20796,HG00138,NA12413,NA12829,NA12874,NA19200,NA07347,NA12286,HG00268,HG00315,NA20516,NA18923	19	1	0	1
	1	20646171	AtoG	-	NA20527,HG00117,HG00315,NA18858,NA19190,NA20543,HG00284,HG00349,HG00244,NA12775,NA19159,NA18912,HG00138,NA18511,NA12004,NA10847,NA20516,NA19116,NA12340,NA12413,NA11893,NA20534,NA18502	23	1	0	1
	1	20646173	AtoG	-	NA18502,HG00133,NA12775,NA10847,NA18511,NA12413,NA11893,NA19190,NA19144,NA12340,NA20543,NA11995,HG00117,NA19116,NA20527,NA18912,HG00349,NA20534,NA20505,HG00138	20	1	1	1
	1	20646183	AtoG	-	NA12340,HG00244,NA18858,NA20518,NA11995,NA19159,HG00138,NA20529,NA11893,NA12413,NA20527,HG00349,NA18511,NA19201,HG00315,HG00133,NA11992	17	1	0	1
	1	20646186	AtoG	-	NA18511,HG00244,NA20515,NA11995,NA18858,NA11832,NA11893,NA20527,NA12340,NA19189,HG00138,NA19201,HG00284,NA19172,NA19144,NA11992,NA12413	17	1	1	1
	1	20646187	AtoG	-	NA19189,NA20534,NA11995,NA11832,NA11893,NA12413,HG00244,NA20527,NA19159,HG00349,HG00315,NA20529,HG00117,NA19144,NA18511,NA12775,NA19190,NA19201,NA19116,NA11992,NA20543,NA19172,NA18502,NA12340,HG00138	25	1	1	1
	1	20646195	AtoG	-	NA12413,NA20529,NA18912,NA20765,NA11832,NA19207,HG00138,NA20527,HG00117,NA11992,NA11893,NA07347,HG00133,NA20518,NA19189,NA19190,NA20534,NA19201	18	1	0	1
	1	20646212	AtoG	-	NA20527,NA11995,NA20515,NA07347,HG00117,NA12340,NA20518,NA19159,HG00143,NA18502,NA20765,NA19248	12	1	0	1
	1	20646219	AtoG	-	NA20527,HG00117,NA12006,NA12340,NA12775,NA19189,NA18502,HG00309,NA20515,NA20765,NA11995,HG00143,NA19172,HG00244,NA18912,HG00360,NA20529	17	1	0	1
	1	20646234	AtoG	-	NA20527,NA19189	2	1	0	1
	1	20646244	AtoG	-	HG00117,NA19248,NA11995,NA20527,HG00244	5	1	0	1
	1	20646260	AtoG	-	NA19116,HG00309,HG00244,HG00117,NA18502,NA07347,NA12006,NA20527,NA20529,NA19248,NA19159	11	1	0	1
	1	20646282	AtoG	-	HG00244,NA20527,NA20529,NA19248,HG00315,NA12340,HG00117,NA12775,NA12006,NA19116	10	1	0	1
	1	20646290	AtoG	-	NA12340,HG00309,NA20527,NA12775,HG00244,NA20529,HG00315,NA19248	8	1	0	1
	1	20646294	AtoG	-	HG00284,NA20527,NA19116,NA20529,HG00244,NA12775,HG00117,HG00309,HG00138,NA19248,NA12340	11	1	0	1
	1	20646303	AtoG	-	HG00244,HG00117,HG00143	3	1	0	1
	1	20647004	AtoG	-	HG00117,NA20518	2	1	0	1
	1	20647385	AtoG	-	NA19095,NA06985	2	1	1	1
	1	20647423	AtoG	-	NA12399,HG00117,NA19095,NA06985	4	1	1	1
	1	20647538	AtoG	-	HG00117,NA19095	2	1	0	1
	1	20647556	AtoG	-	HG00117,NA19118,NA19095	3	1	0	1
	1	20647595	AtoG	-	HG00117,NA19095,NA19118	3	1	0	1
	1	20647609	AtoG	-	NA19095,HG00117	2	1	0	1
	1	20647741	AtoG	-	NA20505,NA19095,HG00117	3	1	0	1
	1	20647742	AtoG	-	HG00117,NA20505,NA19095	3	1	0	1
	1	20647758	AtoG	-	NA20505,HG00117	2	1	0	1
	1	20647855	AtoG	-	NA19248,NA19095,HG00117	3	0	0	0
	1	20647859	AtoG	-	NA11832,HG00138,NA19144,HG00142,NA20505,HG00117,NA19095,NA19223,NA20541,HG00378,NA20765	11	1	0	1
	1	20647909	AtoG	-	HG00179,NA19152,HG00309,NA20518,NA19160,HG00234,NA12413,HG00187,NA20803	9	1	0	1
	1	20647915	AtoG	-	HG00185,NA12043,NA19130,HG00149,NA19248,NA18912,NA19093,HG00117,HG00234,NA19225,NA12342,NA12341,HG00131,NA19144,NA11994,NA12413,NA07056,NA19146,HG00244,HG00378,NA18923,HG00188,NA18508,NA20785,HG00375,HG00237,NA12340,HG00133,HG00284,HG00309,HG00179,NA19189,HG00108,NA06985,NA20765,NA20541,NA20771,HG00139,NA20798,HG00174,NA19223,NA20807,NA12775,HG00276,NA11832,HG00349,HG00111,NA07037,NA11992,NA20809…	64	1	0	1
	1	20647918	AtoG	-	HG00187,HG00139,NA20765,NA07051	4	1	0	1
	1	20647919	AtoG	-	NA19223,NA19118	2	0	0	0
	1	20647924	AtoG	-	NA12341,NA12413,NA12812,HG00309,NA11994,NA19093,NA19095,HG00362,HG00277,HG00185,NA07051,HG00111,NA12718,HG00188,NA12004,HG00276,NA12340,NA20518,NA20771,NA20807,NA20785,NA12342,NA19130,HG00375,NA19223,NA18923,NA19189,HG00139,NA12546,HG00121,NA20798,HG00349,NA07037,NA18508,HG00117	35	1	0	1
	1	20647928	AtoG	-	HG00349,NA18508,NA19189,HG00276,HG00133,HG00277,NA20798	7	1	0	1
	1	20647941	AtoG	-	NA12342,NA19143,NA19225,NA20505,HG00188,NA20809,NA20541,NA07037,NA12413,HG00362,NA19095,NA11832,HG00149,NA18912,HG00108,NA06994,HG00138,HG00244,HG00117,NA10847,NA19118,HG00315,NA20771,NA19189	24	1	0	1
	1	20647945	AtoG	-	NA19160,NA18511,HG00174,NA19223,NA20541,NA19095,NA19130,NA11992,HG00108,NA12546,NA19189,NA18923,HG00121,NA18912,HG00375,NA12751,HG00133,NA12342,NA19143,NA06994,HG00234,HG00258,NA12775,NA20803,HG00237,HG00131,NA10847,NA19152,NA20809,NA19118,HG00185,NA20505,NA19093,HG00111,NA12004,NA12812,NA20510,HG00138,HG00117,NA12043,HG00276,HG00277,NA12340,HG00349	44	1	0	1
	1	20647950	AtoG	-	NA12399,HG00142,HG00117,NA20771,NA12546,NA18912,NA19095,NA19160,NA18511,HG00258,NA20509,NA19189,HG00378,HG00138,NA19143,NA20505,HG00185,NA12340,HG00111,NA12043,HG00108,NA10847,NA12812,NA07051,NA19248,NA11994,NA11830,NA20798,NA12775,HG00362,HG00237,NA19225,NA07056,HG00133,NA19130,HG00309,NA18923,HG00244,HG00315,NA12751,NA11992,HG00234,HG00139,NA19093,NA20803,HG00188,NA20518	47	1	1	1
	1	20647968	AtoG	-	NA20785,NA07056,HG00237,NA11830	4	1	0	1
	1	20647972	AtoG	-	HG00138,HG00258,NA19118,NA12413,NA20771,HG00133	6	1	0	1
	1	20647976	AtoG	-	NA20807,HG00188,NA12340,NA19095,HG00131,HG00277,NA19107,HG00315	8	1	0	1
	1	20647982	AtoG	-	NA11830,HG00258	2	0	0	1
	1	20648008	AtoG	-	NA12775,NA19095,HG00309,NA20509,HG00111,NA19093,HG00174,NA20807,NA20785,NA18912,HG00117	11	1	0	1
	1	20648081	AtoG	-	NA20796,NA20543,NA12156,NA07347,NA19095,NA19146,NA20797,NA12775,HG00375	9	1	0	1
	1	20648087	AtoG	-	NA20796,NA20518,NA18912,HG00179,NA07347,NA20543,NA20785,HG00111,NA19095,NA20797	10	1	0	1
	1	20648088	AtoG	-	NA18508,HG00111,HG00117,NA20543,NA18912,NA12156,HG00179,NA07347,NA19093,NA20797,NA12775,NA19095,NA20509,NA20796,HG00360,NA20518,NA12399	17	1	0	1
	1	20648247	AtoG	+	NA20527,NA06985	2	0	0	0
	1	20648309	AtoG	+	HG00237,HG00127,HG00185,NA20527,NA20513,NA20512,HG00150,NA20808,NA20795,NA06986,HG00260,HG00126,NA20801,HG00240,NA11893,NA12340,NA20538,HG00097,NA20530,NA11920,NA20543,NA12004,HG00351,NA11994,NA20519,HG00263,HG00159,NA20758,HG00262,HG00267,NA12045,HG00271,NA20803,NA20502,NA07347,NA20586,HG00143,HG00315,NA12413,NA20505,HG00251,NA12761,NA20765,NA20515,HG00383,NA20797,HG00378,NA20536	48	0	0	0
	1	20648551	AtoG	-	NA07051,HG00375	2	0	0	0
	1	20649499	AtoG	-	HG00111,NA19172,NA18511,HG00356,NA19206,HG00132,NA11830,NA06985,NA20503,HG00375,NA19198,NA12751,NA12043,NA12342,HG00237,NA20765,HG00360,HG00383,HG00180,NA18868,NA19207,NA18912,NA11994,HG00117,HG00378,NA19118,NA11832,NA19116,NA12829,HG00258,HG00328,NA12340,HG00346,HG00284,NA20513,HG00119,HG00349,NA19146,NA19131,NA20512,NA19141,HG00255,NA12004,HG00338,NA20796,NA19248,NA19152,NA12872,NA11893,HG00334…	60	1	0	1
	1	20649506	AtoG	-	NA20765,NA12156	2	1	0	1
	1	20649508	AtoG	-	NA19131,NA19207,NA18912,NA11832,HG00117,NA12342,HG00258,NA20765,NA19198,NA12043,NA12751,NA06985,HG00360,HG00180,NA19093,HG00334,NA12399,NA12156,NA20527,NA12872,HG00131,NA19248,HG00383,NA19172,NA19206,HG00132,NA18868,NA12340,HG00356,HG00349,NA19116,HG00101,NA20512,NA11992,NA12829,NA19144,NA20503,NA11994,HG00255,HG00119,HG00138,NA11830,NA20543,NA11893,NA19152,HG00375,NA18508,HG00338,NA19146,NA19118…	53	1	1	1
	1	20649520	AtoG	-	NA20796,NA18868,HG00284,NA19141,HG00119,NA20543,NA12004,HG00101,NA19248,HG00255,NA20527,NA19093,NA11994,HG00117,NA12342,NA19118,NA18508,HG00378,HG00131,NA12043,NA11830,NA12006,NA19130,NA20765,HG00383,HG00258,HG00334,NA19198,HG00356,HG00328,NA20503,HG00132,NA12751,NA12829,HG00180,NA18511,NA12872,NA19172,NA20513,NA20512,NA19152	41	1	1	1
	1	20649521	AtoG	-	HG00255,HG00131,NA20512,NA19141,HG00132,HG00119,NA19118,NA20513	8	1	0	1
	1	20649530	AtoG	-	NA12751,NA19206,HG00338,NA19248,HG00101,HG00117,NA19141,HG00259,NA20527,NA19152,NA20765,NA19172,HG00111	13	1	1	1
	1	20649539	AtoG	-	NA18511,HG00334,HG00111,HG00117,NA11832,NA20796,NA19206,HG00132,NA20527,NA20765,NA19130,HG00138,NA19141,NA11994,HG00338	15	1	1	1
	1	20649582	AtoG	-	NA19098,HG00375,HG00117,HG00182,NA19146,HG00284,NA18858	7	1	1	1
	1	20649585	AtoG	-	HG00117,NA11994,HG00111,NA19130,NA20765,NA12340,NA12006,NA20527,HG00338,HG00375,NA20796,NA18858,HG00369	13	1	1	1
	1	20649602	AtoG	-	HG00255,HG00277,NA19207,NA06985,NA19141,NA19098,HG00131,NA19119,NA19116,HG00383,HG00378,HG00127,NA18511,NA11893,HG00111,NA19144,NA12340,NA20765,NA19130,NA19146,HG00338,NA19152,NA12874,NA19153,NA19200,NA12004,HG00349,NA11992,NA19201,HG00346,NA12275,NA20786,HG00132,NA12006,HG00117,NA19118,HG00328,NA19093,HG00259,NA20527,NA20513,NA12399,NA12829,HG00375,NA18858,NA19206,NA11994,NA12751,HG00179,NA12342…	59	1	1	1
	1	20649616	AtoG	-	NA19116,HG00328,NA19146,NA20518,NA12874,HG00136,NA18511,HG00117,NA19143,NA19119,HG00238,HG00277,HG00349	13	1	0	1
	1	20649617	AtoG	-	NA19200,NA19098,NA06985,NA12829,NA19119,NA19093,NA19116,NA20527,HG00338,NA20513,NA20801,NA12340,NA20786,NA19153,NA19146,NA19118,NA18858,NA19143,NA12004,NA20758,HG00375,HG00109,HG00256,HG00117,NA12751,NA12275,HG00238,HG00383,HG00182,NA18511,NA19144,HG00132	32	1	1	1
	1	20649625	AtoG	-	NA12399,NA11832,HG00255,NA12006,HG00375,NA19207,NA20758,NA12004,NA19143,NA20796,HG00109,HG00349,NA19153,NA19146,NA11992,NA11893,NA20529,HG00131,NA12829,HG00136,HG00117,NA19116,HG00277,NA18868,NA18511,HG00258,NA19200,HG00127,NA18909,NA19118,HG00284,NA06985,HG00338,NA19141,NA20527,NA18907,NA19093,HG00328,NA19198,NA12249,NA20786,NA20518,NA12751,NA11994,HG00383,NA20512,HG00238,NA20765,HG00346,NA12275…	53	1	1	1
	1	20649641	AtoG	-	HG00258,HG00136,NA20786,HG00182,NA12045,HG00277,NA18907,NA12342,NA18858,HG00383,NA19118,NA12874,NA11994,NA12006,NA12842,HG00328,NA19144,NA20512,HG00253,NA19201,HG00111,NA11992,NA19153,NA11893,HG00117,NA19130,NA20765,HG00131,NA12340,NA18511,NA18909,NA20804,NA12004,NA12829,NA20529,NA19119,HG00180,NA19143	38	1	1	1
	1	20649643	AtoG	-	HG00180,NA12874,HG00256,NA19144,NA19093,HG00117,HG00346,NA19206,NA20527,HG00258,NA19119,NA12829,NA18909,NA20804,NA12340,NA19131,NA20801,NA11893,HG00375,NA18858,HG00111,NA12275,NA19143,HG00259,NA18511,NA19146,HG00138,HG00338,HG00131,NA19207,HG00277,NA12842,HG00136,NA20758,NA18868,NA12399,HG00349,NA18907,NA20765,NA19118,NA19200	41	1	1	1
	1	20649653	AtoG	-	NA19141,NA20786,NA12275,HG00238,NA20801,NA19093,NA19144	7	1	1	1
	1	20649665	AtoG	-	NA12399,NA19116,HG00256,NA20765	4	1	0	1
	1	20649678	AtoG	-	HG00383,HG00253,NA20529,NA20527,HG00244,NA20534,NA11832,HG00378,NA12340	9	1	0	1
[truncated: 83,567 more rows]

## Sheet: Coding polymorphic diting sites
	Human coding polymorphic A-to-G RNA editing sites analyzed in this study
	Basic information										Protein-coding information				Reference allele in other species (strands based on Ensembl)				Phylogenetic informtaion			Population information				Selective constriants										Functional importance
																										Human-Macaque				Human-Mouse			PhyloP	PhastCons
	Chromosome	Position	SNP ID	Strand	Reference/Alternative allele	Ensembl gene ID	Gene name	Host gene expression (TPM)	CADD score		Type	Amino acid change	Nucleotide change		Chimpanzee	Macaque	Mouse		Types	co-SNP		Allele frequency of A	Median editing level	Prevalence		dn	ds	dn/ds		dn	ds	dn/ds				Essential genes	Expression level	Variant-intolerant genes (pLI ≥ 0.9)	Pleiotropic proteins
	1	961652	rs138709878	+	A/G	ENSG00000187961	KLHL17	6.66	14.79		Nonsynonymous	T/A	Acc/Gcc		-	A	A		-	0		0.998881	0.1	0.0123457		0.0328	0.2902	0.113025		-	-	-	9.004	1		N	high	N	-
	1	1014228	rs1921	+	G/A	ENSG00000187608	ISG15	289.25	2.276		Nonsynonymous	S/N	aGc/aAc		A	G	G		Hardwired	0		0.39821	0.169851	0.027027		0.038	0.2164	0.175601		-	-	-	-0.396	0		Y	high	N	-
	1	1203822	rs2298213	-	A/G	ENSG00000186891	TNFRSF18	3.95	0.012		Synonymous	P	ccA/ccG		G	A	-		-	-		0.847875	0.145455	0.0122699		0.1248	0.1711	0.729398		-	-	-	-0.363	0		N	low	N	-
	1	1486574	rs137911966	+	G/A	ENSG00000160072	ATAD3B	15.33	26.2		Nonsynonymous	A/T	Gcc/Acc		G	-	C		-	0		0.0302013	0.444444	1		0.0612	0.2502	0.244604		-	-	-	7.396	1		N	high	N	-
	1	1486611	rs860213	+	G/A	ENSG00000160072	ATAD3B	15.33	27.1		Nonsynonymous	R/Q	cGg/cAg		G	-	C		-	0		0.181208	0.363636	0.2		0.0612	0.2502	0.244604		-	-	-	7.396	1		N	high	N	-
	1	1487887	rs819977	+	A/G	ENSG00000160072	ATAD3B	15.33	0.745		Synonymous	A	gcA/gcG		A	-	T		-	-		0.744966	0.0690476	0.00760456		0.0612	0.2502	0.244604		-	-	-	-4.674	0		N	high	N	-
	1	1512287	rs201314162	+	A/G	ENSG00000197785	ATAD3A	26.96	0.016		Nonsynonymous	I/V	Att/Gtt		-	-	T		-	0		0.991051	0.0717949	0.0632911		-	-	-		-	-	-	0.859	0.738		N	high	N	-
	1	1704126	rs11488591	-	G/A	ENSG00000008128,ENSG00000268575	CDK11A,RP1-283E3.8	9.925	11.75		Synonymous	A	gcG/gcA		G	G	T		-	-		0.142058	0.094112	0.166667		0.0612	0.2537	0.24123		0.0189	0.9636	0.0196139	-3.924	0		Y	high	N	-
	1	1707486	rs200982240	-	G/A	ENSG00000008128,ENSG00000268575	CDK11A,RP1-283E3.8	9.925	15.2		Nonsynonymous	D/N	Gac/Aac		G	G	-		-	0		0.136465	0.058824	0.15		0.0612	0.2537	0.24123		0.0189	0.9636	0.0196139	3.757	0.998		Y	high	N	-
	1	1707555	rs139262276	-	G/A	ENSG00000008128,ENSG00000268575	CDK11A,RP1-283E3.8	9.925	20.7		Nonsynonymous	G/R	Ggg/Agg		G	G	-		-	0		0.238255	0.142857	0.979592		0.0612	0.2537	0.24123		0.0189	0.9636	0.0196139	4.923	0.984		Y	high	N	-
	1	3844915	rs2275822	-	G/A	ENSG00000116198	CEP104	15.11	12.89		Synonymous	T	acG/acA		G	T	T		-	-		0.403803	0.183333	0.028169		0.0139	0.0698	0.19914		0.1144	0.7752	0.147575	-1.536	0.007		N	high	N	-
	1	3883678	rs3205087	+	A/G	ENSG00000169598	DFFB	3.63	0.005		Synonymous	P	ccA/ccG		A	A	C		-	-		0.602908	0.0833334	0.0298507		0.0217	0.0932	0.232833		-	-	-	-1.6	0		N	low	N	-
	1	5866447	rs555164	-	A/G	ENSG00000131697	NPHP4	2.82	0.035		Synonymous	E	gaA/gaG		-	G	G		-	-		0.635347	0.0833334	0.0263158		0.021	0.1192	0.176174		0.1298	0.8869	0.146352	0.305	0.992		N	low	N	Y
	1	6098502	rs2229002	+	A/G	ENSG00000069424	KCNAB2	65.97	9.251		Synonymous	S	tcA/tcG		-	G	G		-	-		0.39821	0.308298	0.0285714		-	-	-		0.0595	0.8859	0.0671633	-1.775	0.001		N	high	N	-
	1	6218354	rs709209	+	A/G	ENSG00000158286	RNF207	4.27	0.003		Nonsynonymous	N/S	aAc/aGc		G	G	-		-	0		0.589485	0.135714	0.0253165		0.0209	0.1103	0.189483		0.1013	0.9137	0.110868	-0.309	0		N	low	N	-
	1	8358590	rs1058766	-	A/G	ENSG00000142599	RERE	21.86	0.045		Synonymous	R	cgA/cgG		G	G	G		-	-		0.308725	0.195454	0.04		0.0085	0.101	0.0841584		0.027	0.5509	0.0490107	-1.063	0.008		N	high	Y	-
	1	8359794	rs149634880	-	A/G	ENSG00000142599	RERE	21.86	0.002		Synonymous	R	cgA/cgG		A	A	A		-	-		0.998881	0.143039	0.0440098		0.0085	0.101	0.0841584		0.027	0.5509	0.0490107	-5.583	0		N	high	Y	-
	1	8359813	rs376434590	-	A/G	ENSG00000142599	RERE	21.86	8.644		Nonsynonymous	K/R	aAg/aGg		A	A	A		A-Conserved	0		0.997763	0.0929823	0.00470588		0.0085	0.101	0.0841584		0.027	0.5509	0.0490107	6.2	1		N	high	Y	-
	1	8365840	rs3753275	-	A/G	ENSG00000142599	RERE	21.86	2.342		Synonymous	T	acA/acG		A	A	G		-	-		0.775168	0.142857	0.0119048		0.0085	0.101	0.0841584		0.027	0.5509	0.0490107	-0.785	0.017		N	high	Y	-
	1	9264611	rs9434743	+	A/G	ENSG00000049239	H6PD	8.68	0.045		Synonymous	S	tcA/tcG		G	G	C		-	-		0.54698	0.0871212	0.039604		0.0181	0.1252	0.144569		0.0904	0.8294	0.108994	-3.272	0		N	high	N	N
	1	12022869	rs2295283	+	A/G	ENSG00000116691	MIIP	29.78	0.033		Nonsynonymous	K/E	Aag/Gag		G	G	G		G-Conserved	0		0.244966	0.396801	0.0833333		0.0371	0.1063	0.349012		0.2784	0.7853	0.354514	2.408	0.682		N	high	N	-
	1	15933897	rs115746085	+	A/G	ENSG00000065526	SPEN	23.31	21.8		Nonsynonymous	S/G	Agt/Ggt		A	A	A		A-Conserved	0		0.987696	0.0784314	0.00705882		0.011	0.0633	0.173776		0.1078	0.6818	0.158111	1.129	0.144		Y	high	Y	-
	1	16936757	rs200511311	+	A/G	ENSG00000058453	CROCC	2.09	2.318		Synonymous	K	aaA/aaG		A	G	G		-	-		0.997763	0.208556	0.8		0.0137	0.1407	0.0973703		-	-	-	2.014	1		Y	low	N	-
	1	16969269	rs56278097	+	A/G	ENSG00000058453	CROCC	2.09	15.49		Nonsynonymous	S/G	Agc/Ggc		A	A	A		A-Conserved	0		0.909396	0.247619	0.0465116		0.0137	0.1407	0.0973703		-	-	-	0.98	0.013		Y	low	N	-
	1	18876423	rs7550938	-	A/G	ENSG00000255275,ENSG00000159423	RP13-279N23.2,ALDH4A1	2.84	7.073		Synonymous	S	tcA/tcG		A	G	G		-	-		0.334452	0.284195	0.0487805		0.0107	0.1441	0.074254		0.0405	0.8	0.050625	-6.068	0		N	low	N	N
	1	18876432	rs2230706	-	A/G	ENSG00000255275,ENSG00000159423	RP13-279N23.2,ALDH4A1	2.84	5.66		Synonymous	A	gcA/gcG		G	G	A		-	-		0.33557	0.288477	0.0465116		0.0107	0.1441	0.074254		0.0405	0.8	0.050625	0.128	0.958		N	low	N	N
	1	19173066	rs16862578	-	A/G	ENSG00000127481	UBR4	69.62	7.768		Nonsynonymous	T/A	Acc/Gcc		A	A	A		A-Conserved	0		0.813199	0.0606061	0.012605		0.0021	0.057	0.0368421		0.015	0.5321	0.0281902	4.706	1		Y	high	Y	-
	1	19694501	rs4515815	-	G/A	ENSG00000162542	TMCO4	8.04	8.358		Nonsynonymous	R/H	cGt/cAt		G	G	G		G-Conserved	0		0.583893	0.071429	0.0143885		0.0189	0.1184	0.159628		0.1053	0.7301	0.144227	-0.026	0.01		N	high	N	-
	1	19740789	rs200687060	-	A/G	ENSG00000162542	TMCO4	8.04	25.4		Nonsynonymous	T/A	Aca/Gca		A	A	A		A-Conserved	0		0.998881	0.0717949	0.00531915		0.0189	0.1184	0.159628		0.1053	0.7301	0.144227	7.48	1		N	high	N	-
	1	23091660	rs10799790	-	G/A	ENSG00000169641	LUZP1	5.93	10.56		Nonsynonymous	D/N	Gac/Aac		A	A	A		A-Conserved	0		0.838926	0.192982	0.0120482		0.0202	0.05	0.404		0.1076	0.4698	0.229034	1.187	0.958		N	low	N	-
	1	23092890	rs477830	-	G/A	ENSG00000169641	LUZP1	5.93	11.31		Nonsynonymous	G/S	Ggc/Agc		G	G	G		G-Conserved	0		0.799776	0.316279	0.0102041		0.0202	0.05	0.404		0.1076	0.4698	0.229034	1.564	0.019		N	low	N	-
	1	23874619	rs2229580	-	G/A	ENSG00000188822	CNR2	5.68	4.038		Synonymous	P	ccG/ccA		G	G	A		-	-		0.646532	0.068966	0.0726257		0.0191	0.1273	0.150039		0.0931	0.7721	0.12058	-2.915	0		N	low	N	-
	1	25563698	rs28969504	+	A/G	ENSG00000157978	LDLRAP1	7.93	0.123		Synonymous	T	acA/acG		A	-	G		-	-		0.418345	0.250566	0.0266667		-	-	-		0.1079	0.9964	0.10829	-1.2	0		N	high	N	N
	1	26282768	rs7522905	-	G/A	ENSG00000158062	UBXN11	8.14	13.03		Synonymous	T	acG/acA		G	G	G		-	-		0.589485	0.164141	0.0134228		0.0187	0.0831	0.22503		0.109	0.6763	0.161171	-2.651	0		N	high	N	-
	1	26884230	rs3170660	-	A/G	ENSG00000142751	GPN2	28.1	14.63		Nonsynonymous	R/G	Aga/Gga		G	G	G		G-Conserved	0		0.293065	0.473712	0.0363636		0.0013	0.1335	0.00973783		0.0193	0.5665	0.0340688	5.865	1		Y	high	N	-
	1	30742517	rs1050663	-	A/G	ENSG00000162511	LAPTM5	816.59	0.097		Synonymous	S	tcA/tcG		G	C	G		-	-		0.463087	0.0948055	0.0217391		0.0225	0.1485	0.151515		-	-	-	-5.209	0		Y	high	N	-
	1	32217346	rs79700000	-	A/G	ENSG00000160055	TMEM234	5.22	22.6		Nonsynonymous	T/A	Acc/Gcc		A	A	A		A-Conserved	0		0.979866	0.154503	0.00534759		0.1852	0.2714	0.682388		0.0989	0.4269	0.23167	3.65	1		N	low	N	-
	1	32673531	rs12040512	+	A/G	ENSG00000162521	RBBP4	161.75	1.074		Nonsynonymous	R/G	Agg/Ggg		-	A	-		-	0		0.974273	0.0954545	0.52381		0.2195	0.3828	0.573406		-	-	-	-0.624	0		Y	high	Y	-
	1	37997832	rs7366048	-	G/A	ENSG00000183386	FHL3	12.26	14.15		Synonymous	P	ccG/ccA		G	C	C		-	-		0.482103	0.258621	0.0294118		0.0016	0.0747	0.021419		0.0127	0.6103	0.0208094	-0.033	0.89		N	high	N	-
	1	43441225	rs2027130	+	A/G	ENSG00000198198	SZT2	6.69	9.192		Synonymous	E	gaA/gaG		A	A	A		-	-		0.654362	0.0588235	0.0128205		0.0094	0.0639	0.147105		0.0429	0.4434	0.0967524	0.742	1		N	high	N	-
	1	44803661	rs17886354	+	A/G	ENSG00000173846	PLK3	10.78	0.035		Synonymous	T	acA/acG		A	G	A		-	-		0.916107	0.268182	0.00550964		0.0066	0.0759	0.0869565		0.0322	0.5259	0.0612284	-3.13	0		Y	high	N	-
	1	45014037	rs2228084	+	A/G	ENSG00000126088	UROD	52.24	8.47		Synonymous	P	ccA/ccG		A	A	A		-	-		0.9217	0.338626	0.00527705		0.0067	0.0431	0.155452		0.038	0.3602	0.105497	-0.44	0.244		Y	high	N	-
	1	45607925	rs76379164	+	A/G	ENSG00000132780	NASP	156.72	0.006		Synonymous	V	gtA/gtG		G	G	-		-	-		0.998881	0.0555556	0.00802139		0.0173	0.0342	0.505848		0.108	0.3395	0.318115	0.277	0.042		Y	high	N	-
	1	45613182	rs2230658	+	A/G	ENSG00000132780	NASP	156.72	10.39		Synonymous	S	tcA/tcG		A	A	A		-	-		0.269575	0.223514	0.0588235		0.0173	0.0342	0.505848		0.108	0.3395	0.318115	1.88	1		Y	high	N	-
	1	46031037	rs925524	+	A/G	ENSG00000086015	MAST2	11.02	4.691		Synonymous	S	tcA/tcG		G	G	A		-	-		0.282998	0.455357	0.0540541		0.0138	0.0583	0.236707		0.0678	0.4245	0.159717	-3.351	0		Y	high	N	-
	1	46032703	rs1622208	+	A/G	ENSG00000086015	MAST2	11.02	5.597		Synonymous	V	gtA/gtG		G	G	G		-	-		0.257271	0.296651	0.0625		0.0138	0.0583	0.236707		0.0678	0.4245	0.159717	2.025	1		Y	high	N	-
	1	46035321	rs1052610	+	A/G	ENSG00000086015	MAST2	11.02	0.049		Nonsynonymous	D/G	gAc/gGc		-	A	A		-	0		0.914989	0.0787879	0.00558659		0.0138	0.0583	0.236707		0.0678	0.4245	0.159717	0.178	0		Y	high	N	-
	1	46612965	rs4660947	-	A/G	ENSG00000079277,ENSG00000142961	MKNK1,MOB3C	12.425	0.023		Synonymous	A	gcA/gcG		G	-	A		-	-		0.497763	0.0957143	0.0222222		0.0092	0.072	0.127778		0.0362	0.5221	0.0693354	-2.37	0		Y	high	N	-
	1	47260415	rs13376679	-	A/G	ENSG00000123473	STIL	10.78	0.002		Nonsynonymous	H/R	cAt/cGt		A	A	A		A-Conserved	0		0.725951	0.199047	0.0083682		0.0224	0.0386	0.580311		0.1482	0.4994	0.296756	0.011	0		Y	high	N	-
	1	51752554	rs59146623	+	A/G	ENSG00000117859	OSBPL9	72.87	0.581		Nonsynonymous	M/V	Atg/Gtg		A	A	T		G-unfound	0		0.980984	0.157895	0.75		0.0148	0.0898	0.164811		0.0115	0.3651	0.0314982	-0.69	0		Y	high	Y	-
	1	52976704	rs41294530	+	A/G	ENSG00000116171	SCP2	78.7	8.897		Synonymous	E	gaA/gaG		A	A	A		-	-		0.954139	0.0849672	0.0057971		0.0107	0.0562	0.190391		0.0612	0.5398	0.113375	0.789	1		N	high	N	-
	1	53916975	rs7537364	-	A/G	ENSG00000081870	HSPB11	60.02	0.727		Nonsynonymous	K/E	Aag/Gag		-	-	-		-	0		0.763982	0.0909091	0.129032		-	-	-		0.0855	0.4142	0.206422	-0.893	0		N	high	-	-
	1	54758458	rs2270004	-	A/G	ENSG00000162396	PARS2	4.69	0.001		Nonsynonymous	N/S	aAc/aGc		A	A	A		A-Conserved	0		0.856823	0.0769231	0.012987		0.0259	0.0703	0.368421		0.1018	0.5969	0.170548	0.209	0.029		Y	low	N	-
	1	58536549	rs7537470	-	A/G	ENSG00000173406,ENSG00000162600	DAB1,OMA1	10.17	0.614		Synonymous	E	gaA/gaG		-	G	A		-	-		0.868009	0.122004	0.00588235		0.0296	0.0811	0.364982		0.1893	0.7146	0.264903	-0.047	0.954		N	-	N	-
	1	58677041	rs579110	-	A/G	ENSG00000162601	MYSM1	8.18	5.075		Synonymous	P	ccA/ccG		G	G	G		-	-		0.38255	0.325708	0.0384615		0.012	0.0337	0.356083		0.119	0.4187	0.284213	0.106	0.976		N	high	N	-
	1	59378799	rs835435	+	G/A	ENSG00000172456	FGGY	6	8.753		Synonymous	P	ccG/ccA		A	A	A		-	-		0.482103	0.15125	0.0206186		0.0135	0.0599	0.225376		0.0502	0.4145	0.12111	-0.394	0.489		Y	low	N	-
	1	61795496	rs7516332	+	A/G	ENSG00000132849	PATJ	4.15	0.913		Nonsynonymous	I/V	Ata/Gta		A	A	A		A-Conserved	0		0.567114	0.166667	0.0405405		0.0212	0.0612	0.346405		0.11	0.6203	0.177334	0.683	0.929		N	low	N	-
	1	62017927	rs34726576	+	G/A	ENSG00000132849	PATJ	4.15	13.07		Synonymous	K	aaG/aaA		G	A	G		-	-		0.213647	0.078788	0.181818		0.0212	0.0612	0.346405		0.11	0.6203	0.177334	0.397	0.997		N	low	N	-
	1	64844806	rs2230588	-	A/G	ENSG00000162434	JAK1	24.32	0.338		Synonymous	P	ccA/ccG		G	G	G		-	-		0.661074	0.19863	0.014218		0.0024	0.061	0.0393443		0.0245	0.494	0.0495951	-2.977	0		Y	high	Y	-
	1	66365687	rs783036	+	G/A	ENSG00000184588	PDE4B	9.91	11.18		Synonymous	E	gaG/gaA		A	A	A		-	-		0.55481	0.122004	0.0151515		0.0019	0.058	0.0327586		0.0716	0.6597	0.108534	0.313	0.975		N	high	N	-
	1	67386652	rs2228420	+	G/A	ENSG00000081985	IL12RB2	2.85	12.6		Synonymous	T	acG/acA		G	G	T		-	-		0.526846	0.138462	0.0357143		0.0317	0.0447	0.709172		0.2273	0.4964	0.457897	-0.599	0		N	low	N	-
	1	74182641	rs143682100	-	A/G	ENSG00000162620	LRRIQ3	1.64	14.46		Nonsynonymous	H/R	cAt/cGt		A	A	A		A-Conserved	0		0.998881	0.0811689	0.00909091		0.0314	0.0521	0.602687		-	-	-	1.673	1		N	low	N	-
	1	74199809	rs792310	+	G/A	ENSG00000254685,ENSG00000259030	FPGT,FPGT-TNNI3K	3.345	10.54		Synonymous	V	gtG/gtA		A	A	A		-	-		0.407159	0.245066	0.028169		0.0102	0.0461	0.221258		0.1626	0.6093	0.266864	-0.347	0.838		N	-	N	-
	1	74710202	rs3819946	-	A/G	ENSG00000116791	CRYZ	72.23	7.369		Nonsynonymous	I/V	Att/Gtt		G	G	G		G-Conserved	0		0.770694	0.196807	0.00722022		0.0911	0.1909	0.477213		0.1114	0.9239	0.120576	4.218	1		N	high	N	-
	1	74724768	rs1051122	-	G/A	ENSG00000116791	CRYZ	72.23	15.41		Synonymous	G	ggG/ggA		A	A	A		-	-		0.750559	0.265252	0.0119048		0.0911	0.1909	0.477213		0.1114	0.9239	0.120576	0.223	0.996		N	high	N	-
	1	77219357	rs12723684	-	A/G	ENSG00000142892	PIGK	8.98	1.535		Nonsynonymous	T/A	Act/Gct		G	G	G		G-Conserved	0		0.852349	0.136201	0.00626959		0.0138	0.0703	0.196302		0.0548	0.7753	0.0706823	1.015	0.001		Y	high	N	-
	1	86358813	rs144381853	-	A/G	ENSG00000122417	ODF2L	10.51	9.317		Nonsynonymous	K/E	Aaa/Gaa		A	A	A		A-Conserved	0		0.997763	0.0694444	0.00992556		0.0277	0.0562	0.492883		0.1794	0.6725	0.266766	0.681	0.998		N	high	N	-
	1	86372475	rs421105	-	G/A	ENSG00000122417	ODF2L	10.51	14.14		Synonymous	V	gtG/gtA		A	A	C		-	-		0.670022	0.208334	0.015748		0.0277	0.0562	0.492883		0.1794	0.6725	0.266766	0.497	0.742		N	high	N	-
	1	89013391	rs4656078	-	G/A	ENSG00000117226	GBP3	4.93	27.6		Nonsynonymous	R/Q	cGa/cAa		G	G	A		Hardwired	0		0.385906	0.245652	0.05		0.0755	0.1945	0.388175		-	-	-	2.377	0.565		N	low	N	-
	1	89186404	rs1142890	-	G/A	ENSG00000162654	GBP4	6.2	0.017		Nonsynonymous	E/K	Gag/Aag		G	A	C		Diversified	0		0.407159	0.442424	0.0833333		-	-	-		0.2226	0.6492	0.342884	-1.357	0		N	high	N	-
	1	89186414	rs1142886	-	G/A	ENSG00000162654	GBP4	6.2	0.001		Nonsynonymous	M/I	atG/atA		G	A	G		Hardwired	0		0.408277	0.435407	0.0740741		-	-	-		0.2226	0.6492	0.342884	-5.107	0		N	high	N	-
	1	93158817	rs12130734	-	A/G	ENSG00000117500	TMED5	36.63	0.045		Nonsynonymous	Q/R	cAa/cGa		G	C	-		-	0		0.362416	0.0942981	0.322581		0.0047	0.0211	0.222749		0.0525	0.3396	0.154594	-3.268	0		N	high	N	-
	1	95234273	rs142820652	+	A/G	ENSG00000271092,ENSG00000122481	TMEM56-RWDD3,RWDD3	7.16	23.2		Nonsynonymous	I/V	Att/Gtt		A	A	A		A-Conserved	0		0.99217	0.424342	0.00480769		0.074	0.0734	1.00817		0.137	0.3326	0.411906	5.107	1		N	-	N	-
	1	96806900	rs6699932	+	A/G	ENSG00000117569	PTBP2	6.34	0.644		Synonymous	L	ttA/ttG		G	G	G		-	-		0.719239	0.224026	0.0224719		-	-	-		0.0017	0.3034	0.00560316	0.217	0.989		N	high	Y	-
	1	97515839	rs1801159	-	A/G	ENSG00000188641	DPYD	5	9.639		Nonsynonymous	I/V	Ata/Gta		A	A	C		G-unfound	0		0.834452	0.166667	0.0144928		0.0147	0.0615	0.239024		0.0565	0.5459	0.103499	1.397	0.994		Y	low	N	-
	1	99709114	rs12145706	-	G/A	ENSG00000156869	FRRS1	2.8	15.66		Nonsynonymous	M/I	atG/atA		G	G	G		G-Conserved	0		0.121924	0.0625	0.157895		0.0309	0.0726	0.42562		0.1968	0.726	0.271074	0.108	0.156		N	low	N	-
	1	99861532	rs35278779	+	A/G	ENSG00000162688,ENSG00000283495	AGL,AC096949.1	4.88	19.82		Nonsynonymous	T/A	Act/Gct		A	A	A		A-Conserved	0		0.985459	0.0666667	0.010582		0.0146	0.0542	0.269373		0.0455	0.6588	0.069065	9.26	1		N	-	N	-
	1	100133310	rs472498	+	G/A	ENSG00000122435	TRMT13	8.41	22.9		Nonsynonymous	A/T	Gcg/Acg		G	G	G		G-Conserved	0		0.725951	0.083333	0.0142857		0.0092	0.0239	0.384937		0.0833	0.4223	0.197253	2.023	0.881		N	high	N	-
	1	108654729	rs9988420	-	A/G	ENSG00000162639	HENMT1	2.62	23.2		Nonsynonymous	T/A	Acg/Gcg		A	A	A		A-Conserved	0		0.995526	0.0714286	0.0127389		0.0142	0.0461	0.308026		0.2087	0.7217	0.289178	3.397	1		N	low	N	-
	1	108943931	rs77959993	-	A/G	ENSG00000274068,ENSG00000121940	RP11-475E11.9,CLCC1	6.865	24.6		Nonsynonymous	S/G	Agt/Ggt		A	A	A		A-Conserved	0		0.995526	0.0647773	0.00465116		0.1136	0.4031	0.281816		0.4268	0.9325	0.457694	4.769	1		Y	-	N	-
	1	109661214	rs112419376	+	A/G	ENSG00000168765	GSTM4	21.06	0.008		Nonsynonymous	K/R	aAa/aGa		A	A	C		G-unfound	0		0.97651	0.07125	0.0046729		0.0758	0.1959	0.386932		0.0665	0.6297	0.105606	-2.714	0		Y	high	N	-
	1	109661254	rs529656721	+	A/G	ENSG00000168765	GSTM4	21.06	1.845		Synonymous	*	taA/taG		A	A	G		-	-		0.994407	0.136364	0.0526316		0.0758	0.1959	0.386932		0.0665	0.6297	0.105606	0.419	0.336		Y	high	N	-
	1	109689124	rs147668562	+	A/G	ENSG00000213366,ENSG00000134184	GSTM2,GSTM1	27.2	6.167		Nonsynonymous	N/S	aAc/aGc		A	A	A		A-Conserved	0		0.977629	0.213053	0.00862069		0.0894	0.1321	0.67676		0.1186	0.4833	0.245396	2.844	0.986		N	high	N	-
	1	111755960	rs197392	+	A/G	ENSG00000064703	DDX20	8.36	6.789		Synonymous	A	gcA/gcG		-	-	A		-	-		0.722595	0.1	0.0265487		0.0241	0.0735	0.327891		0.095	0.484	0.196281	-0.565	0		Y	high	N	-
	1	111766350	rs197413	+	G/A	ENSG00000064703	DDX20	8.36	0.302		Synonymous	V	gtG/gtA		A	A	G		-	-		0.5	0.330493	0.0168067		0.0241	0.0735	0.327891		0.095	0.484	0.196281	-1.145	0		Y	high	N	-
	1	112456605	rs1175641	+	G/A	ENSG00000143079	CTTNBP2NL	3.27	0.076		Synonymous	Q	caG/caA		A	A	A		-	-		0.879195	0.076923	0.0184049		0.0045	0.0418	0.107656		0.0533	0.4623	0.115293	-0.414	0		Y	low	N	-
	1	112654581	rs3790599	+	A/G	ENSG00000116489	CAPZA1	134.77	2.769		Synonymous	E	gaA/gaG		A	A	T		-	-		0.947427	0.256985	0.005		0.069	0.0717	0.962343		0.2081	0.5377	0.387019	-0.778	0		N	high	Y	-
	1	113812032	rs3195954	-	A/G	ENSG00000081019	RSBN1	10.64	0.956		Synonymous	P	ccA/ccG		A	A	A		-	-		0.850112	0.183181	0.0112994		0.0041	0.0384	0.106771		0.0275	0.2107	0.130517	-0.905	0.619		Y	high	Y	-
	1	113962378	rs17852555	+	G/A	ENSG00000163349	HIPK1	10.15	14.08		Synonymous	P	ccG/ccA		A	A	A		-	-		0.246085	0.208333	0.1		0.0029	0.0386	0.0751295		0.012	0.2955	0.0406091	-0.886	0.006		Y	high	Y	-
	1	114581582	rs62621917	-	A/G	ENSG00000116752	BCAS2	34.67	23.4		Nonsynonymous	T/A	Aca/Gca		A	A	A		A-Conserved	0		0.94519	0.0789473	0.00514139		-	-	-		-	-	-	4.343	1		Y	high	N	-
	1	150457468	rs41273537	+	A/G	ENSG00000163125	RPRD2	10.34	0.001		Nonsynonymous	M/V	Atg/Gtg		A	A	A		A-Conserved	0		0.881432	0.112982	0.00645161		0.0061	0.0261	0.233716		0.0454	0.272	0.166912	-0.27	0.001		Y	high	Y	-
	1	151002632	rs771205	-	A/G	ENSG00000143409	FAM63A	4.38	0.008		Nonsynonymous	K/E	Aag/Gag		G	G	G		G-Conserved	0		0.16443	0.077381	0.047619		0.0531	0.0614	0.864821		0.0868	0.5804	0.149552	-0.113	0		Y	low	N	-
	1	151027261	rs11204762	+	A/G	ENSG00000143363	PRUNE1	9.45	7.998		Synonymous	K	aaA/aaG		-	G	G		-	-		0.767338	0.0710784	0.00784314		0.0141	0.0562	0.25089		0.0894	0.4245	0.210601	0.731	1		N	high	N	-
	1	152910134	rs2229496	+	A/G	ENSG00000163207	IVL	2.61	0.002		Nonsynonymous	T/A	Aca/Gca		G	G	-		-	0		0.772931	0.279412	0.0115607		0.0973	0.1471	0.661455		-	-	-	-0.791	0		Y	low	N	-
	1	152910355	rs372740691	+	A/G	ENSG00000163207	IVL	2.61	NA		Synonymous	P	ccA/ccG		G	G	A		-	-		0.997763	0.0769231	0.148649		0.0973	0.1471	0.661455		-	-	-	-3.069	0		Y	low	N	-
	1	152910877	rs541453475	+	A/G	ENSG00000163207	IVL	2.61	0.062		Synonymous	E	gaA/gaG		A	G	A		-	-		0.997763	0.0769231	0.113208		0.0973	0.1471	0.661455		-	-	-	-0.856	0		Y	low	N	-
	1	152911132	rs7545413	+	G/A	ENSG00000163207	IVL	2.61	1.299		Synonymous	Q	caG/caA		G	G	G		-	-		0.227069	0.066667	0.266667		0.0973	0.1471	0.661455		-	-	-	-0.122	0		Y	low	N	-
	1	152911204	rs7535306	+	A/G	ENSG00000163207	IVL	2.61	0.041		Synonymous	Q	caA/caG		G	G	-		-	-		0.772931	0.0769231	0.0157068		0.0973	0.1471	0.661455		-	-	-	-2.23	0		Y	low	N	-
	1	153561551	rs1047325	-	G/A	ENSG00000196754	S100A2	1.88	4.019		Nonsynonymous	S/N	aGc/aAc		A	A	A		A-Conserved	0		0.137584	0.188312	0.222222		0.0087	0.1151	0.0755864		-	-	-	0.269	0.001		Y	low	N	-
	1	155016481	rs2242195	+	A/G	ENSG00000160685	ZBTB7B	21.01	2.729		Synonymous	P	ccA/ccG		G	-	A		-	-		0.456376	0.169118	0.0340909		0.0325	0.1205	0.26971		0.042	0.497	0.084507	-7.521	0		N	high	N	-
	1	155310361	rs566939675	+	A/G	ENSG00000160752	FDPS	414.6	2.881		Nonsynonymous	E/G	gAg/gGg		A	A	-		-	0		0.995526	0.075	0.015444		0.0673	0.1719	0.391507		0.0918	0.4701	0.195278	-0.058	0.003		Y	high	N	-
	1	155765221	rs2297775	-	A/G	ENSG00000116580	GON4L	14.71	0.002		Nonsynonymous	M/V	Atg/Gtg		A	A	-		-	0		0.717002	0.385714	0.00858369		0.0179	0.0475	0.376842		0.1566	0.526	0.297719	-0.474	0		Y	high	Y	-
	1	155814365	rs34939643	-	A/G	ENSG00000116580	GON4L	14.71	12.97		Nonsynonymous	T/A	Act/Gct		A	A	-		-	0		0.985459	0.0839161	0.00571429		0.0179	0.0475	0.376842		0.1566	0.526	0.297719	0.182	0.602		Y	high	Y	-
	1	156530177	rs1171566	-	A/G	ENSG00000183856	IQGAP3	3.63	4.246		Synonymous	L	ctA/ctG		G	G	G		-	-		0.569351	0.0833333	0.0243902		0.0132	0.0537	0.24581		0.0867	0.5367	0.161543	1.52	1		Y	low	N	-
	1	156530304	rs115742679	-	A/G	ENSG00000183856	IQGAP3	3.63	0.397		Nonsynonymous	K/R	aAg/aGg		A	A	G		Hardwired	0		0.989933	0.0666667	0.00849858		0.0132	0.0537	0.24581		0.0867	0.5367	0.161543	0.873	0.001		Y	low	N	-
	1	156539000	rs79402045	-	A/G	ENSG00000183856	IQGAP3	3.63	7.899		Synonymous	T	acA/acG		A	A	A		-	-		0.986577	0.0833333	0.0101695		0.0132	0.0537	0.24581		0.0867	0.5367	0.161543	-4.886	0		Y	low	N	-
	1	156727264	rs3795737	-	A/G	ENSG00000143319	ISG20L2	32.05	0.001		Nonsynonymous	N/S	aAt/aGt		A	A	A		A-Conserved	0		0.909396	0.295882	0.00540541		0.071	0.1086	0.653775		0.1767	0.6435	0.274592	0.371	0.011		Y	high	N	-
	1	157092802	rs149756524	-	A/G	ENSG00000253831	ETV3L	1.16	0.01		Synonymous	E	gaA/gaG		A	-	-		-	-		0.995526	0.075	0.0222222		-	-	-		-	-	-	0.127	0		N	low	N	-
	1	157539092	rs6427384	-	G/A	ENSG00000143297	FCRL5	30.61	6.095		Nonsynonymous	V/I	Gtc/Atc		G	G	A		Hardwired	0		0.750559	0.178267	0.015748		0.059	0.0717	0.822873		0.4456	0.6801	0.655198	-1.488	0		N	high	N	-
	1	157539235	rs2012199	-	G/A	ENSG00000143297	FCRL5	30.61	0.004		Nonsynonymous	G/D	gGt/gAt		A	A	-		-	0		0.844519	0.160714	0.0100334		0.059	0.0717	0.822873		0.4456	0.6801	0.655198	-1.012	0		N	high	N	-
	1	160351275	rs12239747	+	A/G	ENSG00000162736	NCSTN	40.49	1.769		Synonymous	L	ctA/ctG		G	G	G		-	-		0.912752	0.299146	0.00527705		0.0055	0.0522	0.105364		0.0599	0.447	0.134004	0.827	1		Y	high	Y	N
	1	160823652	rs474131	+	A/G	ENSG00000122224	LY9	14.64	0.91		Synonymous	V	gtA/gtG		G	G	-		-	-		0.49217	0.244445	0.0238095		0.1489	0.1708	0.87178		0.4083	0.6238	0.654537	0.02	0		N	high	N	-
	1	160823770	rs509749	+	A/G	ENSG00000122224	LY9	14.64	NA		Nonsynonymous	M/V	Atg/Gtg		G	A	-		-	0		0.478747	0.20625	0.0217391		0.1489	0.1708	0.87178		0.4083	0.6238	0.654537	-0.201	0		N	high	N	-
	1	168542046	rs4282797	-	A/G	ENSG00000143185	XCL2	0.79	0.264		Synonymous	P	ccA/ccG		A	A	-		-	-		0.791946	0.573077	0.346939		0.0464	0.0451	1.02882		0.2886	0.5651	0.510706	-2.575	0		N	low	N	-
	1	168581100	rs41271659	+	A/G	ENSG00000143184	XCL1	1.07	0.087		Synonymous	T	acA/acG		G	-	-		-	-		0.972036	0.0833333	0.033195		0.0384	0.0784	0.489796		0.2754	0.5931	0.46434	-3.435	0		N	low	N	-
	1	170552235	rs913257	+	G/A	ENSG00000120370	GORAB	9.27	25.9		Nonsynonymous	E/K	Gaa/Aaa		G	G	G		G-Conserved	0		0.477629	0.155844	0.0294118		0.0264	0.0759	0.347826		0.1612	0.5411	0.297912	1.853	0.99		N	high	N	-
	1	173992854	rs10912711	-	A/G	ENSG00000135870	RC3H1	5.17	4.436		Synonymous	K	aaA/aaG		A	A	A		-	-		0.959732	0.0929823	0.0129032		0.0043	0.0361	0.119114		0.0335	0.3291	0.101793	1.171	1		N	low	Y	-
	1	179850896	rs115350827	-	A/G	ENSG00000169905	TOR1AIP2	11.24	5.15		Nonsynonymous	S/G	Agt/Ggt		A	A	A		A-Conserved	0		0.998881	0.0690476	0.0078125		0.0255	0.0449	0.567929		0.2152	0.613	0.35106	1.165	0.117		Y	high	N	-
	1	180041776	rs16855164	+	A/G	ENSG00000135837	CEP350	13.72	1.459		Nonsynonymous	T/A	Aca/Gca		A	A	A		A-Conserved	0		0.919463	0.133333	0.00694444		0.0138	0.0568	0.242958		0.1066	0.5103	0.208897	2.279	1		Y	high	Y	-
	1	180873857	rs147941113	+	A/G	ENSG00000143324	XPR1	9.56	11.24		Nonsynonymous	I/V	Atc/Gtc		A	A	A		A-Conserved	0		0.998881	0.0729166	0.0045977		0.0007	0.0513	0.0136452		0.0243	0.2684	0.0905365	0.583	0.986		N	high	Y	-
	1	181790521	rs704326	+	G/A	ENSG00000198216	CACNA1E	3.94	1.328		Nonsynonymous	A/T	Gcc/Acc		G	G	G		G-Conserved	0		0.371365	0.0840085	0.105263		0.0042	0.0651	0.0645161		0.0156	0.468	0.0333333	0.366	0.001		N	low	Y	-
	1	183116620	rs20563	+	A/G	ENSG00000135862	LAMC1	15.87	0.013		Nonsynonymous	I/V	Att/Gtt		G	G	G		G-Conserved	0		0.479866	0.182784	0.019802		0.0062	0.0805	0.0770186		0.0364	0.591	0.0615905	-0.015	0.003		N	high	Y	-
	1	184694447	rs9425634	-	A/G	ENSG00000116406	EDEM3	7.61	NA		Synonymous	Q	caA/caG		A	G	G		-	-		0.614094	0.0769231	0.0214286		0.0045	0.0422	0.106635		0.03	0.4629	0.0648088	-0.586	0.537		N	high	N	-
	1	186393949	rs182972937	+	A/G	ENSG00000157181	C1orf27	8.08	13.55		Synonymous	K	aaA/aaG		A	A	A		-	-		0.997763	0.266483	0.00497512		0.012	0.0373	0.321716		0.0759	0.3809	0.199265	4.442	1		Y	high	N	-
	1	186977737	rs28395831	+	A/G	ENSG00000116711	PLA2G4A	3.69	2.975		Nonsynonymous	I/V	Atc/Gtc		A	A	A		A-Conserved	0		0.985459	0.0769231	0.00854701		0.0065	0.0584	0.111301		0.0269	0.5918	0.0454545	3.259	0.996		N	low	N	-
	1	186977780	rs2307198	+	G/A	ENSG00000116711	PLA2G4A	3.69	14.82		Nonsynonymous	R/K	aGg/aAg		A	A	A		A-Conserved	0		0.978747	0.080128	0.00651466		0.0065	0.0584	0.111301		0.0269	0.5918	0.0454545	7.038	1		N	low	N	-
	1	197101567	rs41310927	-	A/G	ENSG00000066279	ASPM	14.07	25.5		Nonsynonymous	S/G	Agc/Ggc		A	A	A		A-Conserved	0		0.657718	0.159632	0.0097561		0.0188	0.0499	0.376754		0.1916	0.6366	0.300974	1.824	1		Y	high	N	-
	1	197104802	rs2878749	-	A/G	ENSG00000066279	ASPM	14.07	0.45		Synonymous	K	aaA/aaG		A	A	A		-	-		0.6566	0.0980861	0.013986		0.0188	0.0499	0.376754		0.1916	0.6366	0.300974	-0.911	0.001		Y	high	N	-
	1	200580323	rs115265657	-	A/G	ENSG00000118193	KIF14	6.01	0.204		Synonymous	L	ctA/ctG		A	A	T		-	-		0.967562	0.0620301	0.00547945		0.0198	0.0678	0.292035		0.1704	0.7796	0.218574	0.133	0.948		Y	low	N	-
	1	200600463	rs115233014	-	A/G	ENSG00000118193	KIF14	6.01	0.05		Synonymous	R	agA/agG		A	A	A		-	-		0.997763	0.0540936	0.00524934		0.0198	0.0678	0.292035		0.1704	0.7796	0.218574	1.013	1		Y	low	N	-
	1	200815632	rs34505744	+	A/G	ENSG00000118200	CAMSAP2	5.51	6.995		Synonymous	P	ccA/ccG		A	A	A		-	-		0.996644	0.0662394	0.00714286		0.0034	0.053	0.0641509		0.0384	0.579	0.0663212	-0.157	0.637		N	low	Y	-
	1	200832807	rs41306231	+	A/G	ENSG00000118200	CAMSAP2	5.51	20.3		Nonsynonymous	T/A	Act/Gct		A	A	A		A-Conserved	0		0.995526	0.0694444	0.00809717		0.0034	0.053	0.0641509		0.0384	0.579	0.0663212	3.426	1		N	low	Y	-
	1	201999954	rs1130790	+	G/A	ENSG00000176393	RNPEP	42.4	13.36		Synonymous	Q	caG/caA		G	G	G		-	-		0.356823	0.591357	0.0294118		0.0092	0.0784	0.117347		0.065	0.4898	0.132707	4.103	1		Y	high	N	-
	1	202160596	rs542698065	-	A/G	ENSG00000143851	PTPN7	53.56	25.4		Nonsynonymous	D/G	gAc/gGc		-	A	-		-	0		0.998881	0.0694444	0.0052356		0.0734	0.2042	0.359452		0.0407	0.4655	0.0874329	1.463	0.891		Y	high	N	-
	1	202764110	rs3196669	-	G/A	ENSG00000117139	KDM5B	7.47	18.75		Synonymous	T	acG/acA		A	A	A		-	-		0.671141	0.076923	0.0206897		0.0031	0.0493	0.0628803		0.0289	0.4459	0.0648127	0.463	1		Y	high	N	-
	1	203183673	rs880633	-	A/G	ENSG00000133048	CHI3L1	1.86	23.9		Nonsynonymous	R/G	Aga/Gga		A	A	A		A-Conserved	0		0.541387	0.0999999	0.0444444		0.0153	0.0983	0.155646		0.1596	0.7406	0.215501	2.1	0.98		N	low	N	-
	1	204469206	rs1124777	-	G/A	ENSG00000133056	PIK3C2B	11.39	2.096		Synonymous	P	ccG/ccA		G	G	-		-	-		0.83557	0.069048	0.0277778		0.0045	0.0608	0.0740132		0.0317	0.5361	0.0591308	-2.264	0		Y	high	Y	-
	1	206430185	rs2297539	+	G/A	ENSG00000266028	SRGAP2	5.44	12.06		Synonymous	L	ctG/ctA		G	G	G		-	-		0.428412	0.083333	0.0625		0.0004	0.0612	0.00653595		0.0081	0.3923	0.0206475	0.397	0.998		-	low	-	-
	1	207472977	rs1048971	+	G/A	ENSG00000117322	CR2	38.1	1.517		Synonymous	L	ctG/ctA		A	A	-		-	-		0.431767	0.275209	0.0227273		0.0383	0.0674	0.568249		0.214	0.5021	0.42621	0.522	0.443		N	high	N	-
	1	207609511	rs17047660	+	A/G	ENSG00000203710	CR1	3.72	7.292		Nonsynonymous	K/E	Aaa/Gaa		A	A	A		A-Conserved	0		0.950783	0.0729166	0.00961539		0.0371	0.0764	0.485602		0.2909	0.6056	0.48035	0.526	0		N	low	N	-
	1	209760195	rs2076150	+	A/G	ENSG00000009790	TRAF3IP3	69.48	4.571		Synonymous	Q	caA/caG		G	G	A		-	-		0.638702	0.144928	0.0146341		0.022	0.051	0.431373		0.2072	0.5393	0.384202	0.314	0.001		N	high	N	-
	1	214622268	rs6697155	+	A/G	ENSG00000117724	CENPF	42.9	27.4		Nonsynonymous	Q/R	cAg/cGg		A	A	A		A-Conserved	0		0.998881	0.0634921	0.00501253		0.0265	0.0525	0.504762		0.2248	0.616	0.364935	6.053	1		Y	high	N	-
	1	214640144	rs2070066	+	A/G	ENSG00000117724	CENPF	42.9	5.017		Synonymous	L	ttA/ttG		G	G	G		-	-		0.911633	0.0769231	0.0100334		0.0265	0.0525	0.504762		0.2248	0.616	0.364935	0.832	1		Y	high	N	-
	1	215620492	rs14137	+	G/A	ENSG00000136636	KCTD3	4.89	4.325		Synonymous	A	gcG/gcA		G	C	A		-	-		0.587248	0.118966	0.0296296		0.0022	0.0698	0.0315186		0.0327	0.8479	0.0385659	-3.656	0		Y	low	Y	-
	1	217431312	rs35737297	-	A/G	ENSG00000092978	GPATCH2	3.2	25.5		Nonsynonymous	M/V	Atg/Gtg		A	-	-		-	0		0.969799	0.233333	0.0133333		0.006	0.035	0.171429		0.0803	0.6513	0.123292	7.138	1		Y	low	N	-
	1	222629034	rs2936052	+	A/G	ENSG00000154305	MIA3	28.82	0.51		Nonsynonymous	K/R	aAa/aGa		-	A	A		-	0		0.812081	0.168301	0.00980392		0.0549	0.0673	0.81575		0.1542	0.6695	0.230321	3.169	0.092		Y	high	N	-
	1	222629862	rs2936051	+	A/G	ENSG00000154305	MIA3	28.82	19.55		Nonsynonymous	E/G	gAg/gGg		-	A	A		-	0		0.808725	0.267942	0.00947867		0.0549	0.0673	0.81575		0.1542	0.6695	0.230321	3.421	0.982		Y	high	N	-
	1	223712842	rs2230083	+	A/G	ENSG00000162909	CAPN2	10.33	16.37		Nonsynonymous	S/G	Agc/Ggc		A	A	A		A-Conserved	0		0.998881	0.0777778	0.00568182		0.0072	0.104	0.0692308		0.0321	0.6732	0.0476827	-0.528	0		N	high	N	-
	1	223717830	rs17596	+	G/A	ENSG00000162909	CAPN2	10.33	17.39		Synonymous	L	ctG/ctA		G	G	G		-	-		0.681208	0.1	0.0229885		0.0072	0.104	0.0692308		0.0321	0.6732	0.0476827	0.123	0.986		N	high	N	-
	1	223747018	rs17600	+	G/A	ENSG00000162909	CAPN2	10.33	4.544		Synonymous	A	gcG/gcA		G	A	-		-	-		0.758389	0.074176	0.0155642		0.0072	0.104	0.0692308		0.0321	0.6732	0.0476827	-1.887	0		N	high	N	-
	1	225423959	rs1056607	-	G/A	ENSG00000143815	LBR	57.55	15.02		Synonymous	V	gtG/gtA		A	A	A		-	-		0.699105	0.138282	0.00892857		0.0088	0.0573	0.153578		0.1168	0.7555	0.1546	-3.1	0		N	high	Y	-
	1	225859274	rs2292561	-	A/G	ENSG00000196187	TMEM63A	11.1	11.17		Synonymous	L	ctA/ctG		G	G	G		-	-		0.912752	0.115502	0.00555556		0.0078	0.1039	0.0750722		0.0507	0.6411	0.0790828	-0.403	0.48		N	high	N	-
	1	227028961	rs1929861	-	A/G	ENSG00000143776	CDC42BPA	4.18	0.053		Synonymous	K	aaA/aaG		-	G	G		-	-		0.53132	0.274243	0.0289855		0.0044	0.0382	0.115183		0.0196	0.402	0.0487562	0.51	0.995		Y	low	Y	-
	1	229325277	rs2282083	-	G/A	ENSG00000154429	CCSAP	9.67	12.06		Synonymous	P	ccG/ccA		G	G	-		-	-		0.397092	0.055556	0.0461538		0.0452	0.1236	0.365696		0.209	0.9124	0.229066	-7.614	0		N	high	N	-
	1	229637185	rs3811474	+	A/G	ENSG00000135763	URB2	7.19	6.432		Nonsynonymous	K/E	Aaa/Gaa		A	A	-		-	0		0.900447	0.08125	0.0056338		0.0295	0.0815	0.361963		0.1888	0.5925	0.31865	3.227	0.067		Y	high	N	-
	1	231266156	rs574553	+	G/A	ENSG00000116906	GNPAT	38.31	1.583		Synonymous	E	gaG/gaA		A	A	G		-	-		0.543624	0.250457	0.015625		0.0117	0.0442	0.264706		0.117	0.6771	0.172796	1.632	1		N	high	N	N
	1	234393806	rs2175594	-	G/A	ENSG00000059588	TARBP1	27.33	11.59		Synonymous	A	gcG/gcA		G	A	A		-	-		0.48434	0.242723	0.0392157		0.0286	0.0926	0.308855		0.1657	0.8352	0.198396	-0.644	0.013		N	high	N	-
	1	234433446	rs3754311	-	A/G	ENSG00000059588	TARBP1	27.33	7.394		Synonymous	A	gcA/gcG		A	G	A		-	-		0.887025	0.129329	0.0060423		0.0286	0.0926	0.308855		0.1657	0.8352	0.198396	-0.582	0.636		N	high	N	-
	1	234446905	rs4920246	-	A/G	ENSG00000059588	TARBP1	27.33	0.018		Nonsynonymous	S/G	Agt/Ggt		G	G	G		G-Conserved	0		0.706935	0.0769231	0.0232558		0.0286	0.0926	0.308855		0.1657	0.8352	0.198396	1.841	0.933		N	high	N	-
	1	234448485	rs2102596	-	G/A	ENSG00000059588	TARBP1	27.33	8.082		Synonymous	Q	caG/caA		A	A	G		-	-		0.274049	0.0679825	0.0606061		0.0286	0.0926	0.308855		0.1657	0.8352	0.198396	-0.965	0		N	high	N	-
	1	235160983	rs2295815	-	A/G	ENSG00000188739,ENSG00000054267	RBM34,ARID4B	39.965	0.032		Synonymous	E	gaA/gaG		G	G	G		-	-		0.825503	0.193321	0.00643087		0.0323	0.0691	0.467438		0.1945	0.7244	0.268498	0.622	0		Y	high	N	-
	1	235229231	rs12731746	-	A/G	ENSG00000054267	ARID4B	13.05	12.68		Synonymous	E	gaA/gaG		G	G	G		-	-		0.527964	0.299342	0.0176991		0.0057	0.0379	0.150396		0.049	0.4385	0.111745	4.555	1		Y	high	Y	-
	1	235977874	rs3213190	-	A/G	ENSG00000116962	NID1	8.75	9.458		Nonsynonymous	Q/R	cAg/cGg		G	G	G		G-Conserved	0		0.823266	0.0909091	0.0185874		0.0125	0.0923	0.135428		0.0801	0.6229	0.128592	0.151	0.974		N	high	N	-
	1	236012039	rs2031487	-	A/G	ENSG00000116962	NID1	8.75	10.48		Synonymous	V	gtA/gtG		G	G	G		-	-		0.444072	0.177997	0.0322581		0.0125	0.0923	0.135428		0.0801	0.6229	0.128592	-0.171	0.668		N	high	N	-
	1	236045473	rs10733133	-	G/A	ENSG00000116962	NID1	8.75	0.131		Nonsynonymous	V/I	Gtt/Att		A	A	A		A-Conserved	0		0.482103	0.124537	0.0434783		0.0125	0.0923	0.135428		0.0801	0.6229	0.128592	-1.092	0		N	high	N	-
	1	236583143	rs2794768	-	G/A	ENSG00000119285	HEATR1	21.47	7.705		Synonymous	V	gtG/gtA		G	G	G		-	-		0.608501	0.0791665	0.0233918		0.0143	0.0609	0.234811		0.0943	0.549	0.171767	-0.124	0.004		Y	high	Y	-
	1	236585205	rs1006456	-	A/G	ENSG00000119285	HEATR1	21.47	2.792		Synonymous	L	ttA/ttG		A	A	A		-	-		0.391499	0.162467	0.0246914		0.0143	0.0609	0.234811		0.0943	0.549	0.171767	0.203	0.992		Y	high	Y	-
	1	236592537	rs2564739	-	G/A	ENSG00000119285	HEATR1	21.47	14.13		Synonymous	R	agG/agA		G	G	A		-	-		0.61745	0.127907	0.0166667		0.0143	0.0609	0.234811		0.0943	0.549	0.171767	0.708	1		Y	high	Y	-
	1	236885200	rs1805087	+	A/G	ENSG00000116984	MTR	15.17	23.5		Nonsynonymous	D/G	gAc/gGc		A	A	A		A-Conserved	0		0.797539	0.258914	0.00749064		0.0146	0.0522	0.279693		0.0422	0.4376	0.0964351	8.536	1		Y	high	N	-
	1	236891269	rs2229276	+	A/G	ENSG00000116984	MTR	15.17	0.626		Synonymous	A	gcA/gcG		A	A	A		-	-		0.649888	0.0962708	0.0210526		0.0146	0.0522	0.279693		0.0422	0.4376	0.0964351	-1.117	0		Y	high	N	-
	1	241566555	rs142291823	+	A/G	ENSG00000117009	KMO	5.4	0.03		Nonsynonymous	N/S	aAt/aGt		A	A	G		Hardwired	0		0.997763	0.0767046	0.00662252		0.034	0.0604	0.562914		0.1236	0.6394	0.193306	1.182	0.002		N	low	N	-
	1	241634198	rs187777115	-	A/G	ENSG00000054277,ENSG00000203668	OPN3,CHML	8.455	0.326		Synonymous	E	gaA/gaG		A	A	A		-	-		0.995526	0.0732324	0.00660066		0.0215	0.0589	0.365025		0.1179	0.5433	0.217007	-0.383	0.001		N	-	N	-
	1	241858532	rs4149901	+	A/G	ENSG00000174371	EXO1	13.85	6.152		Synonymous	G	ggA/ggG		A	A	A		-	-		0.998881	0.0777778	0.0045977		0.0202	0.0963	0.209761		0.1592	0.839	0.18975	0.792	0.998		Y	high	N	-
	1	241866849	rs735943	+	A/G	ENSG00000174371	EXO1	13.85	0.029		Nonsynonymous	H/R	cAt/cGt		G	G	A		Hardwired	0		0.410515	0.216667	0.0238095		0.0202	0.0963	0.209761		0.1592	0.839	0.18975	0.399	0.99		Y	high	N	-
	1	246999356	rs2642973	-	G/A	ENSG00000197472,ENSG00000135747	ZNF695,ZNF670-ZNF695	1.31	0.029		Nonsynonymous	R/K	aGa/aAa		A	A	C		G-unfound	0		0.840045	0.090909	0.0157068		0.0349	0.0375	0.930667		0.3857	0.9909	0.389242	-1.671	0.037		Y	low	N	-
	10	7964835	rs4747647	+	A/G	ENSG00000165632	TAF3	4.55	0.01		Nonsynonymous	N/S	aAt/aGt		A	A	A		A-Conserved	0		0.466443	0.0694444	0.0185185		0.009	0.0636	0.141509		0.0736	0.6665	0.110428	-0.159	0		Y	low	Y	-
	10	11565566	rs142330030	-	A/G	ENSG00000148429	USP6NL	13.77	8.028		Nonsynonymous	*/W	tAg/tGg		-	G	-		-	0		0.996644	0.0690476	0.0679887		0.027	0.0913	0.295728		0.1086	0.6844	0.158679	-0.928	0.008		N	high	-	-
	10	11747383	rs4750090	+	G/A	ENSG00000134463	ECHDC3	6.3	25.1		Nonsynonymous	A/T	Gcg/Acg		G	G	-		-	0		0.917226	0.0625	0.0103093		0.0158	0.1259	0.125496		0.0976	0.9282	0.10515	6.514	1		Y	low	N	-
	10	11755485	rs34878615	+	A/G	ENSG00000134463	ECHDC3	6.3	5.612		Synonymous	Q	caA/caG		A	A	-		-	-		0.983221	0.0625	0.00611621		0.0158	0.1259	0.125496		0.0976	0.9282	0.10515	4.818	1		Y	low	N	-
	10	11763358	rs10906011	+	G/A	ENSG00000134463	ECHDC3	6.3	2.352		Synonymous	S	tcG/tcA		A	A	T		-	-		0.536913	0.083333	0.046875		0.0158	0.1259	0.125496		0.0976	0.9282	0.10515	-2.247	0		Y	low	N	-
	10	12004547	rs7079388	-	A/G	ENSG00000151461	UPF2	16.09	3.167		Nonsynonymous	N/S	aAc/aGc		A	A	A		A-Conserved	0		0.887025	0.110361	0.00566572		0.0021	0.042	0.05		0.0132	0.4186	0.0315337	0.006	0.955		Y	high	Y	-
	10	13611653	rs1135102	+	A/G	ENSG00000165630,ENSG00000282246	PRPF18,RP11-295P9.13	7.84	6.064		Synonymous	K	aaA/aaG		A	A	G		-	-		0.55481	0.104883	0.0144928		0.0235	0.1437	0.163535		0.0232	0.6667	0.0347983	1.579	1		Y	-	N	-
	10	15843220	rs549681937	-	A/G	ENSG00000148481	FAM188A	8.95	23.1		Nonsynonymous	D/G	gAt/gGt		A	A	A		A-Conserved	0		0.995526	0.0588235	0.0143678		-	-	-		0.0273	0.2831	0.0964324	3.927	1		N	high	Y	-
	10	16505059	rs7904014	+	A/G	ENSG00000165983	PTER	10.74	5.392		Synonymous	Q	caA/caG		A	A	A		-	-		0.487696	0.0939394	0.0183486		0.0454	0.1656	0.274155		0.066	0.6283	0.105045	0.049	0.068		N	high	N	-
	10	17174557	rs2273734	-	G/A	ENSG00000107614	TRDMT1	2.15	12.12		Synonymous	T	acG/acA		A	-	A		-	-		0.466443	0.21558	0.105263		-	-	-		0.1069	0.5411	0.197561	-0.3	0.869		Y	low	N	-
	10	27219829	rs10764690	-	A/G	ENSG00000107897	ACBD5	12.13	6.415		Synonymous	P	ccA/ccG		A	A	A		-	-		0.60962	0.0627451	0.0224719		0.0161	0.0459	0.350763		0.0952	0.4997	0.190514	2.842	1		N	high	N	-
	10	31831750	rs2808100	-	G/A	ENSG00000165322	ARHGAP12	6.92	15.78		Synonymous	G	ggG/ggA		G	G	G		-	-		0.191275	0.090909	0.2		0.0128	0.0842	0.152019		0.0421	0.4432	0.094991	0.046	0.984		N	high	N	-
	10	31852532	rs2799021	-	A/G	ENSG00000165322	ARHGAP12	6.92	4.593		Synonymous	E	gaA/gaG		A	A	G		-	-		0.815436	0.0909091	0.012605		0.0128	0.0842	0.152019		0.0421	0.4432	0.094991	0.352	0.997		N	high	N	-
	10	34119708	rs11009651	-	A/G	ENSG00000148498	PARD3	11.51	2.454		Synonymous	R	cgA/cgG		G	G	G		-	-		0.737136	0.258522	0.0192308		0.0141	0.0656	0.214939		0.0425	0.7179	0.0592004	-0.158	0.702		N	high	Y	-
	10	34331292	rs3781128	-	G/A	ENSG00000148498	PARD3	11.51	18		Synonymous	S	tcG/tcA		A	A	C		-	-		0.508949	0.142289	0.0183486		0.0141	0.0656	0.214939		0.0425	0.7179	0.0592004	-3.84	0		N	high	Y	-
	10	38118591	rs176889	+	A/G	ENSG00000075407	ZNF37A	8.06	0.503		Synonymous	S	tcA/tcG		G	-	A		-	-		0.511186	0.1	0.0319149		0.1283	0.1354	0.947563		-	-	-	-3.282	0		N	high	N	-
	10	42593883	rs7914982	-	A/G	ENSG00000196693	ZNF33B	5.68	8.925		Nonsynonymous	H/R	cAc/cGc		G	G	-		-	0		0.987696	0.0678733	0.00554017		0.0217	0.0553	0.392405		-	-	-	0.093	0		N	low	N	-
	10	43556947	rs190762635	-	A/G	ENSG00000196793	ZNF239	0.73	16.67		Nonsynonymous	Y/C	tAt/tGt		A	A	A		A-Conserved	0		0.997763	0.0763158	0.0740741		0.031	0.0531	0.583804		-	-	-	-1.967	0		N	low	N	-
	10	45763429	rs200274112	+	A/G	ENSG00000172661	FAM21C	18.99	2.465		Synonymous	A	gcA/gcG		-	-	-		-	-		0.996644	0.0734501	0.0637813		0.0331	0.0782	0.423274		0.1643	0.5888	0.279042	0.577	0.001		N	high	-	-
[truncated: 1,518 more rows]

## Sheet: Cumulative distribution
The cumulative distribution of the 447 individuals against the nonsynonymous SNP editing sites.
